# Supplementary material
Source: PubMed Central journal article supplement (PMC3796129)
Supplement: NIHMS477330-supplement-1_si_001.pdf [file NIHMS477330-supplement-1_si_001.pdf]

**Evidence for a functionally relevant rocaglamide binding site on the eIF4A:RNA  
complex**

Heather Sadlish<sup>1\*</sup>, Gabriela Galicia-Vazquez<sup>3</sup>, C. Gregory Paris<sup>2</sup>, Thomas Aust<sup>1</sup>, Bhupinder  
Bhullar<sup>1</sup>, Lena Chang<sup>1</sup>, Stephen B. Helliwell<sup>1</sup>, Dominic Hoepfner<sup>1</sup>, Britta Knapp<sup>1</sup>, Ralph Riedl<sup>1</sup>,  
Silvio Roggo<sup>1</sup>, Sven Schuierer<sup>1</sup>, Christian Studer<sup>1</sup>, John A. Porco Jr.<sup>6</sup>, Jerry Pelletier<sup>3,4,5</sup>, N. Rao  
Movva<sup>1</sup>

<sup>1</sup>Novartis Institutes for BioMedical Research, Novartis Campus, CH-4056 Basel Switzerland

<sup>2</sup>Novartis Institutes for BioMedical Research, 250 Massachusetts Avenue Cambridge MA 02139,  
United States of America

<sup>3</sup>Department of Biochemistry and <sup>4</sup>Oncology, <sup>5</sup>The Rosalind and Morris Goodman Cancer  
Research Center, McGill University, Montreal, Quebec, Canada

<sup>6</sup>Department of Chemistry, Center for Chemical Methodology and Library Development, Boston  
University, Boston, Massachusetts, United States of America

\* Corresponding author: heather.sadlish@novartis.com

| Systematic Name | MADL scores for ROC-N | MADL for Silvestrol | z-score for ROC-N |
|-----------------|-----------------------|---------------------|-------------------|
| Q0010           |                       |                     |                   |
| Q0017           |                       |                     |                   |
| Q0032           |                       |                     |                   |
| Q0045           |                       |                     |                   |
| Q0050           |                       |                     |                   |
| Q0055           |                       |                     |                   |
| Q0060           |                       |                     |                   |
| Q0065           |                       |                     |                   |
| Q0070           |                       |                     |                   |
| Q0075           |                       |                     |                   |
| Q0080           |                       |                     |                   |
| Q0085           |                       |                     |                   |
| Q0092           |                       |                     |                   |
| Q0105           |                       |                     |                   |
| Q0110           |                       |                     |                   |
| Q0115           |                       |                     |                   |
| Q0120           |                       |                     |                   |
| Q0130           |                       |                     |                   |
| Q0140           |                       |                     |                   |
| Q0142           |                       |                     |                   |
| Q0143           |                       |                     |                   |
| Q0144           |                       |                     |                   |
| Q0160           |                       |                     |                   |
| Q0182           |                       |                     |                   |
| Q0250           |                       |                     |                   |
| Q0255           |                       |                     |                   |
| Q0275           |                       |                     |                   |
| Q0297           |                       |                     |                   |
| R0010W          |                       |                     |                   |
| R0020C          |                       |                     |                   |
| R0030W          |                       |                     |                   |
| R0040C          |                       |                     |                   |
| YAL001C         | -0.065564455          | 0.759973622         | -0.081057283      |
| YAL002W         | -4.129750255          | -0.977883979        | -2.138541424      |
| YAL003W         | 0.98893158            | 1.230542318         | 0.979269341       |
| YAL004W         | 0.497243538           | 0.833681922         | 0.304430812       |
| YAL005C         | 1.550200993           | -0.123233345        | 0.390029466       |
| YAL007C         | -0.172775883          | 0.179005664         | -0.142743456      |
| YAL008W         | 2.960007569           | 2.65288496          | 2.144478803       |
| YAL009W         | -0.958190197          | 0.087504866         | -0.843627823      |
| YAL010C         | -0.116407229          | -0.039840065        | -0.112656063      |
| YAL011W         | 3.165905087           | 3.68740615          | 1.35173523        |
| YAL012W         | -0.27036163           | -1.248309369        | -0.209402417      |
| YAL013W         | -4.267884389          | -0.387087524        | -3.248998367      |
| YAL014C         | -0.393558995          | 0.377345729         | -0.306931237      |
| YAL015C         | 0.08156686            | 0.209359176         | 0.068786296       |
| YAL016C-A       |                       |                     |                   |
| YAL016C-B       |                       |                     |                   |
| YAL016W         | -3.096465665          | 0.10465954          | -2.055404287      |
| YAL017W         | -0.005563178          | 0.375482937         | -0.003871905      |
| YAL018C         | -0.099010323          | -1.975219689        | -0.074234997      |
| YAL019W         | -0.021395959          | 0.003468166         | -0.015187191      |

|           |              |              |              |
|-----------|--------------|--------------|--------------|
| YAL019W-A |              |              |              |
| YAL020C   | 0.013087593  | 1.324804294  | 0.012442653  |
| YAL021C   | -9.174291712 | -5.77723472  | -4.203504803 |
| YAL022C   | -0.11778648  | 0.01415769   | -0.12867047  |
| YAL023C   | 1.811646929  | 4.76536544   | 0.771175676  |
| YAL024C   | 0.336311134  | 0.051529177  | 0.435797255  |
| YAL025C   | 1.419341213  | 0.483751437  | 0.690239033  |
| YAL026C   | 0.147057889  | 0.667883814  | 0.094545375  |
| YAL026C-A |              |              |              |
| YAL027W   | -0.029529554 | -0.083133363 | -0.034081992 |
| YAL028W   | 3.049860339  | -0.132926939 | 2.596693401  |
| YAL029C   | -0.101951396 | 0.045854579  | -0.122194542 |
| YAL030W   | 0.647915792  | 0.73660581   | 0.88017938   |
| YAL031C   | -0.694805085 | -0.07492208  | -0.654875656 |
| YAL031W-A |              |              |              |
| YAL032C   | -0.202240337 | -0.023441166 | -0.17708387  |
| YAL033W   | -0.467224423 | 2.02956946   | -0.419593606 |
| YAL034C   | 0.030423361  | -1.742089558 | 0.022682537  |
| YAL034C-B |              |              |              |
| YAL034W-A | 0.500002927  | 1.536836789  | 0.45244904   |
| YAL035C-A | -0.712996093 | -0.014926316 | -0.548024323 |
| YAL035W   | -23.57482745 | -20.49212112 | -6.342076825 |
| YAL036C   | -0.016235085 | 0.208866152  | -0.016241437 |
| YAL037C-A |              |              |              |
| YAL037C-B |              |              |              |
| YAL037W   | -0.926461597 | 0.091277172  | -0.572355566 |
| YAL038W   | 0.137130145  | -0.003763558 | 0.11321802   |
| YAL039C   | -0.65341891  | -1.940121342 | -0.497218254 |
| YAL040C   | -0.166951851 | -1.740860082 | -0.132645577 |
| YAL041W   | 0.828259752  | 1.039297143  | 0.635705093  |
| YAL042C-A |              |              |              |
| YAL042W   | -1.834837055 | -1.471994206 | -1.029426529 |
| YAL043C   | -0.070968769 | 1.770571986  | -0.035809384 |
| YAL043C-A | -0.123149169 | -0.699999275 | -0.108104349 |
| YAL044C   | 14.87480521  | 3.536930361  | 4.998385823  |
| YAL044W-A |              |              |              |
| YAL045C   | 4.155681122  | 2.713315873  | 1.881044767  |
| YAL046C   | -0.015234283 | 0.09571125   | -0.01473488  |
| YAL047C   | 0.170200076  | -1.305963344 | 0.205198981  |
| YAL047W-A |              |              |              |
| YAL048C   | -0.118663951 | -2.404003989 | -0.105172312 |
| YAL049C   | -2.866316667 | -2.854145618 | -1.411486371 |
| YAL051W   | 0.065533696  | 0.137470647  | 0.082230522  |
| YAL053W   | -0.001729307 | -1.524196211 | -0.002331808 |
| YAL054C   | -0.03183066  | 0.57130393   | -0.03858952  |
| YAL055W   | 0.265682145  | 0.162656111  | 0.297645422  |
| YAL056C-A |              |              |              |
| YAL056W   | 0.088356392  | 0.595382534  | 0.108335796  |
| YAL058C-A | 1.584305183  | 0.271424637  | 1.694160316  |
| YAL058W   | -0.352342895 | -0.016529838 | -0.3816065   |
| YAL059C-A |              |              |              |
| YAL059W   | -0.095600734 | 0.583184028  | -0.08768765  |
| YAL060W   | -0.048750969 | 0.036655395  | -0.05861604  |

|           |              |              |              |
|-----------|--------------|--------------|--------------|
| YAL061W   | 2.00897447   | 2.504271362  | 1.421268311  |
| YAL062W   | -0.017945445 | 0.542884694  | -0.024240956 |
| YAL063C   |              |              |              |
| YAL063C-A |              |              |              |
| YAL064C-A | 1.433915736  | -2.798979246 | 1.256344924  |
| YAL064W   |              |              |              |
| YAL064W-B |              |              |              |
| YAL065C   | 0.031687272  | 0.637909695  | 0.027974977  |
| YAL066W   | 0.229643739  | 1.269344365  | 0.189265347  |
| YAL067C   | -0.014586106 | 0.197280255  | -0.011651663 |
| YAL067W-A |              |              |              |
| YAL068C   | 0.892330591  | 1.373879847  | 0.974941679  |
| YAL068W-A |              |              |              |
| YAL069W   |              |              |              |
| YAR002C-A | -0.319815657 | 0.638004823  | -0.26188149  |
| YAR002W   | -11.69865549 | -15.17499919 | -1.543333024 |
| YAR003W   | 0.108054523  | 0.137018888  | 0.13855401   |
| YAR007C   | 0.301624912  | 0.036552286  | 0.24671145   |
| YAR008W   | 1.516118072  | 0.056479599  | 1.215671384  |
| YAR014C   | -0.008879105 | 1.049733703  | -0.009729851 |
| YAR015W   | 0.018687082  | -0.177730087 | 0.025225853  |
| YAR018C   | -5.912180911 | -2.804915097 | -2.009710216 |
| YAR019C   | -0.044640463 | -0.355644113 | -0.038616455 |
| YAR019W-A |              |              |              |
| YAR020C   | -0.41486935  | -1.10497132  | -0.316310443 |
| YAR023C   | -0.042736297 | -0.374246038 | -0.047938045 |
| YAR027W   | 0.533421583  | 0.170670738  | 0.582041206  |
| YAR028W   | -0.070145539 | -0.399275308 | -0.0552842   |
| YAR029W   | -0.124885174 | -0.076294925 | -0.132088752 |
| YAR030C   | 0.097414824  | -0.124796769 | 0.120687298  |
| YAR031W   | 0.031290544  | 0.925673605  | 0.034357039  |
| YAR033W   |              |              |              |
| YAR035C-A |              |              |              |
| YAR035W   | 1.222362151  | 1.964024633  | 1.150139016  |
| YAR037W   | -0.2173673   | 0.219032045  | -0.245208826 |
| YAR040C   | -0.079357105 | -0.008521389 | -0.069446638 |
| YAR042W   | 0.502235272  | -0.626648788 | 0.401404613  |
| YAR043C   | 1.764713469  | 0.47278134   | 1.260140891  |
| YAR044W   | 0.04816657   | 0.250082866  | 0.034325475  |
| YAR047C   | 14.22882386  | 3.221707858  | 3.77917841   |
| YAR050W   | 0.239695474  | 1.938271727  | 0.204023136  |
| YAR053W   |              |              |              |
| YAR060C   |              |              |              |
| YAR064W   |              |              |              |
| YAR066W   |              |              |              |
| YAR068W   |              |              |              |
| YAR069C   |              |              |              |
| YAR070C   |              |              |              |
| YAR071W   |              |              |              |
| YAR073W   |              |              |              |
| YAR075W   |              |              |              |
| YBL001C   | 11.98642683  | 12.79860112  | 2.297972558  |
| YBL002W   | 13.02175027  | 0.165602142  | 2.995463871  |

|           |              |              |              |
|-----------|--------------|--------------|--------------|
| YBL003C   |              |              |              |
| YBL004W   | -0.050324597 | 0.02377039   | -0.054465421 |
| YBL005W   |              |              |              |
| YBL006C   | -0.084429382 | 0.22019426   | -0.093289853 |
| YBL006W-A |              |              |              |
| YBL007C   | -0.012364137 | 0.16958558   | -0.012685098 |
| YBL008W   | -0.600217628 | 0.113153352  | -0.633881066 |
| YBL008W-A |              |              |              |
| YBL009W   | -0.682948816 | -1.201202372 | -0.70834607  |
| YBL010C   | -0.266571497 | -0.025970963 | -0.327456229 |
| YBL011W   | 22.82688663  | 3.725963186  | 4.47904385   |
| YBL012C   | -0.039469234 | -0.102269238 | -0.039912986 |
| YBL013W   | 5.367974199  | 3.682269301  | 2.099732374  |
| YBL014C   |              |              |              |
| YBL015W   | 1.803969717  | 0.152816376  | 2.14731229   |
| YBL016W   | 0.137138795  | -0.013448463 | 0.17255867   |
| YBL017C   | -0.263255095 | 1.04637831   | -0.294308559 |
| YBL018C   | -0.327359388 | 0.107323296  | -0.420374049 |
| YBL019W   | -2.137898353 | 0.445229504  | -2.009621863 |
| YBL020W   | -1.38505514  | -0.280978296 | -1.636441653 |
| YBL021C   |              |              |              |
| YBL022C   |              |              |              |
| YBL023C   | -6.300509793 | -8.672187483 | -2.504660016 |
| YBL024W   | -0.029374817 | -0.018337136 | -0.03304648  |
| YBL025W   | -0.163886083 | -0.630742601 | -0.191067145 |
| YBL026W   | -0.120314846 | -0.029989373 | -0.053588642 |
| YBL027W   | 3.578907326  | 0.269624184  | 1.25034904   |
| YBL028C   | -0.070878538 | 0.762442148  | -0.104844679 |
| YBL029C-A |              |              |              |
| YBL029W   | 0.004369948  | 0.074900602  | 0.005460953  |
| YBL030C   | 2.027068432  | -0.055367518 | 1.782636445  |
| YBL031W   | -1.878114773 | 0.321272042  | -1.955308715 |
| YBL032W   | 0.242087439  | -0.773245427 | 0.219647011  |
| YBL033C   | -0.291114658 | 0.11646528   | -0.218351488 |
| YBL034C   | -0.06795862  | -1.102477337 | -0.07225498  |
| YBL035C   | -0.030951875 | 0.021947433  | -0.039482385 |
| YBL036C   | -0.016381095 | -0.165539565 | -0.020033244 |
| YBL037W   | 0.363233444  | -0.018353421 | 0.504623738  |
| YBL038W   | -0.012963629 | -0.216603469 | -0.012166652 |
| YBL039C   | 0.11860733   | 0.379049744  | 0.135030698  |
| YBL039C-A |              |              |              |
| YBL039W-B |              |              |              |
| YBL040C   | 0.012205612  | 0.870050322  | 0.020445469  |
| YBL041W   | 4.523395459  | 1.437804375  | 4.078575708  |
| YBL042C   | -0.012174104 | 0.890227171  | -0.004909669 |
| YBL043W   | 0.152603788  | 1.011424649  | 0.211795533  |
| YBL044W   | -5.972029283 | -6.604288327 | -2.138796163 |
| YBL045C   | 0.098347598  | 0.292636896  | 0.115059955  |
| YBL046W   | -1.605198644 | -0.258293013 | -0.258584393 |
| YBL047C   | 19.59609698  | 7.774480059  | 3.511368624  |
| YBL048W   | -0.127228493 | -0.116809297 | -0.168964534 |
| YBL049W   | -0.018314895 | -0.086332928 | -0.022113357 |
| YBL050W   | -2.687429021 | 0.701321524  | -2.270098927 |

|           |              |              |              |
|-----------|--------------|--------------|--------------|
| YBL051C   | 0.689090553  | 0.56470583   | 0.941181216  |
| YBL052C   | -0.033712402 | 0.528981057  | -0.033492662 |
| YBL053W   | -0.233874648 | -0.059595541 | -0.246843833 |
| YBL054W   | -0.506013705 | -0.225796534 | -0.390267011 |
| YBL055C   | -0.083537787 | -0.462855032 | -0.07044036  |
| YBL056W   | -1.773425259 | -0.069091812 | -1.612026013 |
| YBL057C   | 0.471870983  | 0.002424808  | 0.602533607  |
| YBL058W   | 0.222283901  | 0.064213557  | 0.249334484  |
| YBL059C-A |              |              |              |
| YBL059W   | -0.087151604 | 0.951122918  | -0.135526259 |
| YBL060W   | 0.891405659  | -0.099323204 | 1.272243028  |
| YBL061C   | 0.029755153  | 0.070527774  | 0.040217414  |
| YBL062W   | 0.005687378  | -0.100959329 | 0.006806302  |
| YBL063W   | 0.005734665  | 0.604085122  | 0.008975991  |
| YBL064C   | 0.046356253  | 0.003854752  | 0.052658022  |
| YBL065W   | -13.91536028 | -15.61829473 | -4.280568622 |
| YBL066C   | 0.151304697  | 0.088163543  | 0.144681064  |
| YBL067C   | -19.7242748  | -18.16445372 | -5.36604559  |
| YBL068W   | 1.940261543  | 1.045803538  | 1.832554157  |
| YBL068W-A |              |              |              |
| YBL069W   |              |              |              |
| YBL070C   | 0.654591843  | 1.356957482  | 0.736521829  |
| YBL071C   | -0.185217384 | -0.005777407 | -0.224137637 |
| YBL071C-B |              |              |              |
| YBL071W-A |              |              |              |
| YBL072C   | 3.040462606  | 1.119435573  | 1.430531052  |
| YBL073W   | 0.072889163  | 0.1556673    | 0.104421708  |
| YBL074C   | 0.003415994  | -0.11743211  | 0.004609917  |
| YBL075C   |              |              |              |
| YBL076C   | 0.173848948  | -0.04499021  | 0.189143936  |
| YBL077W   | -0.208621038 | -0.902693987 | -0.232295588 |
| YBL078C   | 0.215994198  | 0.033205751  | 0.203646328  |
| YBL079W   | -0.558370907 | -0.389854019 | -0.369581586 |
| YBL080C   | -0.159500282 | 1.034822454  | -0.155400778 |
| YBL081W   | 0.988782821  | 0.485624793  | 0.735087645  |
| YBL082C   | 0.070843418  | 0.808561269  | 0.089481716  |
| YBL083C   | 0.351579421  | -0.042146063 | 0.342098079  |
| YBL084C   | 0.493154642  | 0.341322278  | 0.440329911  |
| YBL085W   | 0.009270552  | 0.231150712  | 0.011511861  |
| YBL086C   | -1.948362965 | 1.35103699   | -1.293933679 |
| YBL087C   | 5.776960384  | 4.023473923  | 2.449181129  |
| YBL088C   | -1.427783637 | 0.091492969  | -1.569028984 |
| YBL089W   | 0.003964612  | -0.088379083 | 0.003848019  |
| YBL090W   | -0.082904784 | 0.029334555  | -0.08584606  |
| YBL091C   |              | -9.907779382 |              |
| YBL091C-A | -6.747549936 | -1.397284262 | -4.357933068 |
| YBL092W   | -2.986116949 | 0.010064066  | -1.613167977 |
| YBL093C   | 8.725777822  | 8.722255544  | 2.719378458  |
| YBL094C   | -0.017760496 | 0.250085586  | -0.019886756 |
| YBL095W   | 0.018892789  | 0.225381537  | 0.017695476  |
| YBL096C   | 0.898889743  | 0.014675608  | 0.745885959  |
| YBL097W   | -0.018262903 | 0.246081003  | -0.018074704 |
| YBL098W   | -0.065614563 | 0.469674371  | -0.096165549 |

|           |              |              |              |
|-----------|--------------|--------------|--------------|
| YBL099W   | -0.357350815 | -0.950141707 | -0.286936123 |
| YBL100C   | 0.2072612    | 0.067796023  | 0.234449043  |
| YBL100W-C |              |              |              |
| YBL101C   | -0.122512021 | -2.29198931  | -0.140699187 |
| YBL102W   | 0.479492019  | 0.052030261  | 0.547584683  |
| YBL103C   | -2.395250772 | -0.11070919  | -2.408887054 |
| YBL104C   | -0.179570571 | -0.008689821 | -0.226353171 |
| YBL105C   | 1.22919605   | 1.158689279  | 1.326633411  |
| YBL106C   | 0.735447355  | 0.257379279  | 0.759565674  |
| YBL107C   | 0.19229291   | -0.021015937 | 0.156865939  |
| YBL107W-A |              |              |              |
| YBL108C-A |              |              |              |
| YBL108W   |              |              |              |
| YBL109W   |              |              |              |
| YBL111C   |              |              |              |
| YBL112C   |              |              |              |
| YBL113C   |              |              |              |
| YBL113W-A |              |              |              |
| YBR001C   | 1.070854726  | -0.049359608 | 1.301010265  |
| YBR002C   | 4.949532352  | 4.165509063  | 3.352684826  |
| YBR003W   | -1.863301765 | -0.165585187 | -2.151925114 |
| YBR004C   | -0.941811068 | -0.081022473 | -0.821257584 |
| YBR005W   | -0.057265106 | -0.011177415 | -0.067367023 |
| YBR006W   | 2.333206199  | 0.027259012  | 2.315355287  |
| YBR007C   | -2.5993073   | -3.344660386 | -2.221421383 |
| YBR008C   | -0.805908191 | -0.283170619 | -0.871066255 |
| YBR009C   | -1.781117224 | 0.012166914  | -2.050089641 |
| YBR010W   | -2.002578881 | -0.012845953 | -1.831045686 |
| YBR011C   | -0.028258593 | -0.043985892 | -0.031446811 |
| YBR012C   | 0.01414216   | 0.718361431  | 0.01875834   |
| YBR013C   | -0.633605025 | 0.250597848  | -0.664780346 |
| YBR014C   | 2.866137842  | 0.211985045  | 2.145698339  |
| YBR015C   | -0.599445604 | 0.004738466  | -0.715367389 |
| YBR016W   | -1.560641797 | -1.338306139 | -1.188157051 |
| YBR017C   | -0.105545917 | -0.050958216 | -0.146767246 |
| YBR018C   | -0.642498425 | -2.11890648  | -0.551156099 |
| YBR019C   | -0.352792398 | -1.391237453 | -0.379187472 |
| YBR020W   | 6.859431973  | 0.003533991  | 7.478156057  |
| YBR021W   | 0.040279324  | -0.163143989 | 0.0372335    |
| YBR022W   | -0.226766948 | -0.070889166 | -0.259580672 |
| YBR023C   | 0.606258571  | 0.012637185  | 0.604826926  |
| YBR024W   | -0.081519765 | 0.778299704  | -0.103984376 |
| YBR025C   | 0.020087221  | -0.040174176 | 0.018271837  |
| YBR026C   | -0.366009393 | 0.005655716  | -0.416290583 |
| YBR027C   | 0.183856174  | 0.21685805   | 0.197600326  |
| YBR028C   | 0.765739223  | 0.111030632  | 0.883520172  |
| YBR029C   | -0.303582304 | 1.23922899   | -0.285336091 |
| YBR030W   | -2.699730867 | -0.57604981  | -2.203027747 |
| YBR031W   | -1.242095519 | -0.699373246 | -0.969574686 |
| YBR032W   | -0.094617586 | 0.00100833   | -0.083823722 |
| YBR033W   | -0.171549587 | -0.3371553   | -0.17582257  |
| YBR034C   | 0.326333928  | -0.112254933 | 0.296663874  |
| YBR035C   | -0.67300583  | 0.166010455  | -0.481024728 |

|           |              |              |              |
|-----------|--------------|--------------|--------------|
| YBR036C   | 0.198275496  | 0.129699485  | 0.160875492  |
| YBR037C   | 0.450040727  | 0.87248944   | 0.507897344  |
| YBR038W   | 0.064496771  | 0.276796429  | 0.058585383  |
| YBR039W   | -0.220842725 | 0.008119399  | -0.173514408 |
| YBR040W   | -0.197770938 | 0.310354283  | -0.187070299 |
| YBR041W   |              |              |              |
| YBR042C   | -1.709982683 | -0.093410399 | -1.534988543 |
| YBR043C   | -0.375074175 | 0.018181986  | -0.448654138 |
| YBR044C   | -0.014274834 | -0.31340205  | -0.01384167  |
| YBR045C   | -0.022178012 | -0.003394382 | -0.023632441 |
| YBR046C   | -0.171188178 | -0.301517097 | -0.207983834 |
| YBR047W   | -0.353309431 | 0.000604992  | -0.403841798 |
| YBR048W   | 0.531739929  | 0.925985686  | 0.474509741  |
| YBR049C   | 5.047685917  | -0.299820932 | 2.675464827  |
| YBR050C   | -0.339160476 | 0.151105803  | -0.317866649 |
| YBR051W   | -0.043242632 | -1.826548036 | -0.028387214 |
| YBR052C   | 0.051352003  | 1.01727709   | 0.045306287  |
| YBR053C   | 0.016197158  | 0.133853512  | 0.018584771  |
| YBR054W   | 0.044577332  | 0.01217747   | 0.055335871  |
| YBR055C   | -2.02431883  | -1.264720814 | -1.931348052 |
| YBR056C-B |              |              |              |
| YBR056W   | -0.003669246 | 0.001239043  | -0.004057245 |
| YBR056W-A |              |              |              |
| YBR057C   | 1.323602021  | 0.477574076  | 1.093237397  |
| YBR058C   | -0.208649886 | -0.040063979 | -0.22566904  |
| YBR058C-A |              |              |              |
| YBR059C   | -0.123618872 | 0.062944911  | -0.07182556  |
| YBR060C   | -3.394693128 | 0.342788455  | -3.116113246 |
| YBR061C   | -0.124187173 | -0.557578493 | -0.163617367 |
| YBR062C   | -0.349692704 | -0.058179401 | -0.411183395 |
| YBR063C   | 0.36108309   | -0.309024691 | 0.398637156  |
| YBR064W   | 1.602178369  | 1.108686203  | 1.42166576   |
| YBR065C   | -0.003204028 | 1.311465235  | -0.002848315 |
| YBR066C   | 0.071228877  | -0.536802239 | 0.068499152  |
| YBR067C   | -0.053118351 | 0.010834336  | -0.049751278 |
| YBR068C   | -0.171004129 | 0.092180217  | -0.173536876 |
| YBR069C   | 0.022551612  | -0.40461213  | 0.024815933  |
| YBR070C   | -1.323207875 | 0.008597371  | -1.441201532 |
| YBR071W   | 0.228322767  | 1.048539452  | 0.205349911  |
| YBR072C-A |              |              |              |
| YBR072W   | 1.362237397  | 1.023978222  | 1.120313557  |
| YBR073W   | -0.337608675 | 0.051998258  | -0.381837537 |
| YBR074W   | -0.282202073 | 0.00060506   | -0.318662196 |
| YBR075W   | 0.072638437  | -0.258326707 | 0.077096191  |
| YBR076C-A |              |              |              |
| YBR076W   | 0.122107786  | 0.019294654  | 0.167322796  |
| YBR077C   | -0.036222515 | -0.823520961 | -0.05701024  |
| YBR078W   | -0.336192907 | 0.27755885   | -0.136697298 |
| YBR079C   | -11.08308392 | -15.93561751 | -14.18919114 |
| YBR080C   | 0.00402932   | -1.392846379 | 0.002873176  |
| YBR081C   | -2.635806008 | -0.145919325 | -1.869656571 |
| YBR082C   | -0.784803766 | -1.136773944 | -0.643340933 |
| YBR083W   | -0.105092766 | 1.296920356  | -0.099532746 |



|           |              |              |              |
|-----------|--------------|--------------|--------------|
| YBR084C-A | -0.004483087 | 0.150367518  | -0.002264483 |
| YBR084W   | -0.02688751  | -0.09960059  | -0.028246836 |
| YBR085C-A |              |              |              |
| YBR085W   | 0.004227727  | 0.014291845  | 0.00627906   |
| YBR086C   | 0.124104541  | -0.590012444 | 0.113410347  |
| YBR087W   | -0.032187925 | -0.001856761 | -0.02592324  |
| YBR088C   | -0.009361996 | -0.187782772 | -0.007613176 |
| YBR089C-A |              |              |              |
| YBR089W   | -0.564608121 | 0.008327277  | -0.621648786 |
| YBR090C   | 0.000852532  | 1.693225773  | 0.00096413   |
| YBR090C-A | 0.135476011  | 1.827066398  | 0.11967387   |
| YBR091C   | -0.909280509 | 0.139791015  | -0.326728461 |
| YBR092C   | -1.858200313 | -0.082004215 | -1.712132311 |
| YBR093C   | -0.067543143 | 0.098720758  | -0.074194176 |
| YBR094W   | -0.57114077  | 1.986342045  | -0.58074363  |
| YBR095C   | -12.75069507 | -3.077039032 | -2.894965736 |
| YBR096W   | -0.176224598 | 0.006654822  | -0.223361948 |
| YBR097W   | 0.078508579  | -0.042861909 | 0.077322032  |
| YBR098W   | -0.236925541 | -1.216714217 | -0.24138061  |
| YBR099C   | -0.28715198  | -2.313238091 | -0.300173007 |
| YBR100W   | 0.039900068  | 0.196536427  | 0.035546255  |
| YBR101C   | -9.893606606 | -11.30107604 | -2.840854219 |
| YBR102C   | 0.726742121  | 0.087566248  | 0.757918951  |
| YBR103C-A |              |              |              |
| YBR103W   | 2.553008994  | 1.017916758  | 1.903202042  |
| YBR104W   | 0.025549555  | 0.059284591  | 0.028302593  |
| YBR105C   |              |              |              |
| YBR106W   | -0.76965494  | 0.075664708  | -1.106013316 |
| YBR107C   | -0.853669383 | 1.026020716  | -1.149003481 |
| YBR108W   | -0.045585879 | -0.099486144 | -0.047108724 |
| YBR109C   | -0.00108387  | 0.571382562  | -0.000632707 |
| YBR109W-A |              |              |              |
| YBR110W   | -0.544578323 | 0.386787975  | -0.332322716 |
| YBR111C   | -0.037022345 | -1.521500698 | -0.025656974 |
| YBR111W-A |              |              |              |
| YBR112C   | -0.575963203 | 0.142639189  | -0.521988619 |
| YBR113W   | 0.737426082  | -0.032677356 | 0.647107042  |
| YBR114W   | 0.534669483  | 0.0859095    | 0.537452827  |
| YBR115C   | -0.049527751 | 1.083553846  | -0.058002849 |
| YBR116C   | -0.095367886 | -0.279313271 | -0.104324054 |
| YBR117C   | -0.143580366 | 0.000965471  | -0.1669208   |
| YBR118W   | -1.308753834 | -0.497421652 | -1.659451819 |
| YBR119W   | -0.204733143 | -2.581991001 | -0.122564906 |
| YBR120C   | -0.041712921 | -0.902074127 | -0.039741994 |
| YBR121C   | -0.943357254 | -0.042749017 | -1.366666036 |
| YBR121C-A |              |              |              |
| YBR122C   |              |              |              |
| YBR123C   | 2.787367592  | 2.216633778  | 2.006923986  |
| YBR124W   | -0.014069505 | 0.753684448  | -0.01600589  |
| YBR125C   | 1.321922602  | 1.453397436  | 1.470531988  |
| YBR126C   | -21.13170487 | -14.15167816 | -6.899937595 |
| YBR126W-A |              |              |              |
| YBR126W-B |              |              |              |

|            |              |              |              |
|------------|--------------|--------------|--------------|
| YBR127C    | -1.01543458  | -2.133238673 | -0.905064255 |
| YBR128C    | -0.041477782 | -0.01336437  | -0.033275966 |
| YBR129C    | -0.145129114 | -0.020194133 | -0.116097568 |
| YBR130C    | -0.874263551 | -1.843624523 | -0.69780478  |
| YBR131C-A  |              |              |              |
| YBR131W    | -0.331383249 | 0.047107063  | -0.327303341 |
| YBR132C    | 0.333336194  | 0.034603595  | 0.29211006   |
| YBR133C    | 0.902970083  | 7.118329707  | 0.24108686   |
| YBR134W    | 0.039968457  | 0.075253195  | 0.033387984  |
| YBR135W    | 0.085675495  | 1.551091248  | 0.06643732   |
| YBR136W    | -0.183770269 | 0.53069595   | -0.122230505 |
| YBR137W    | 0.038342958  | 0.954047457  | 0.04420514   |
| YBR138C    | -0.028253165 | -0.058374373 | -0.031029191 |
| YBR139W    | -0.193817013 | -0.671906022 | -0.182551317 |
| YBR140C    | 0.602943547  | 4.437358489  | 0.427233538  |
| YBR141C    | -0.003096771 | 0.216398107  | -0.00326642  |
| YBR141W-A  |              |              |              |
| YBR142W    | -0.009558156 | 0.467514927  | -0.012096153 |
| YBR143C    | 2.145255672  | 1.015934581  | 1.477760824  |
| YBR144C    | -0.020972205 | 0.00270037   | -0.029467896 |
| YBR145W    | -1.447937518 | 0.411923017  | -1.618108957 |
| YBR146W    | 0.538352366  | -0.299286935 | 0.684892091  |
| YBR147W    | -0.050180301 | -0.907062285 | -0.07159153  |
| YBR148W    | -0.843528822 | -0.379868825 | -1.108077152 |
| YBR149W    | -0.956144408 | 0.025121362  | -0.830859648 |
| YBR150C    | -0.794371146 | -1.434090242 | -0.806862743 |
| YBR151W    | -0.178552711 | -0.159837155 | -0.225141404 |
| YBR152W    | 6.250103653  | -0.001331223 | 7.184667892  |
| YBR153W    | -0.262679549 | -0.226179563 | -0.285139055 |
| YBR154C    | 15.63430785  | 3.687674217  | 3.023151738  |
| YBR155W    | 0.065312211  | 0.280592525  | 0.052536958  |
| YBR156C    | -21.1749478  | -24.18088384 | -2.395974186 |
| YBR157C    | -0.024221928 | -1.590832404 | -0.021697541 |
| YBR158W    | 0.082147091  | -0.022587361 | 0.085852611  |
| YBR159W    | 1.714848368  | -1.86218711  | 1.180655442  |
| YBR160W    | -0.972216761 | -1.93527736  | -0.830135853 |
| YBR160W_AS |              |              |              |
| YBR161W    | -0.108510288 | 0.24744621   | -0.149463649 |
| YBR162C    | -0.515399837 | -1.853668589 | -0.455193532 |
| YBR162W-A  | -0.056396785 | -0.719664288 | -0.072698815 |
| YBR163W    | 0.000467212  | 0.112410532  | 0.000716415  |
| YBR164C    | -0.771959965 | 0.78178666   | -0.705248575 |
| YBR165W    | -3.59252067  | -0.239999785 | -3.126814758 |
| YBR166C    | -0.006641556 | -0.109264633 | -0.006547237 |
| YBR167C    | 0.009266473  | 0.001318083  | 0.011332421  |
| YBR168W    | -0.454436416 | 0.405376558  | -0.325851042 |
| YBR169C    | -0.030192611 | 0.046951205  | -0.025035616 |
| YBR170C    | 0.995930154  | -1.580323992 | 0.813177408  |
| YBR171W    | -0.078491667 | 0.094842396  | -0.079333766 |
| YBR172C    | -0.021756955 | 0.006391343  | -0.021511725 |
| YBR173C    | 7.187040478  | 1.771300748  | 3.570466838  |
| YBR174C    | 0.397010984  | -0.365956749 | 0.436615955  |
| YBR175W    | 2.540279445  | 0.59616439   | 2.050600801  |

|           |              |              |              |
|-----------|--------------|--------------|--------------|
| YBR176W   | 0.014399497  | 0.109821699  | 0.015996935  |
| YBR177C   | -0.00636781  | -1.056448983 | -0.006814028 |
| YBR178W   | 0.65851589   | 0.561871666  | 0.630706195  |
| YBR179C   | -0.025145061 | 0.037992074  | -0.039600632 |
| YBR180W   | 0.000298385  | -0.059120274 | 0.000357805  |
| YBR181C   | 6.072727655  | 0.644098503  | 2.24602012   |
| YBR182C   | -0.879810827 | 0.274242475  | -1.135307314 |
| YBR182C-A |              |              |              |
| YBR183W   | 0.007740494  | -0.744055961 | 0.009299588  |
| YBR184W   | -0.866923342 | -0.036986823 | -0.90759209  |
| YBR185C   | -1.142706767 | 0.164784098  | -1.15229365  |
| YBR186W   | -0.015791436 | -0.295002035 | -0.018690502 |
| YBR187W   | 1.527477675  | 0.948945163  | 1.450946174  |
| YBR188C   | -1.353777831 | 0.000156084  | -1.49371773  |
| YBR189W   | 2.974482117  | 1.48888249   | 2.071056234  |
| YBR190W   | 6.387310072  | 5.961402807  | 2.249387933  |
| YBR191W   | 6.565307853  | 7.347091541  | 2.079076656  |
| YBR191W-A |              |              |              |
| YBR192W   | 1.426327166  | -0.008385975 | 1.708036062  |
| YBR193C   | -0.107575782 | -0.283540151 | -0.115499611 |
| YBR194W   | 0.031962573  | -0.571131279 | 0.044155934  |
| YBR195C   | -0.249423747 | -0.652050247 | -0.283949109 |
| YBR196C   | -0.018027556 | -0.020412776 | -0.017743354 |
| YBR196C-A |              |              |              |
| YBR196C-B |              |              |              |
| YBR197C   | -0.002038075 | 1.190715504  | -0.002031736 |
| YBR198C   | -3.416458346 | -2.736443496 | -1.896538803 |
| YBR199W   | 0.088077229  | -0.427655665 | 0.129088495  |
| YBR200W   | -1.64757681  | -0.030274318 | -1.046025715 |
| YBR200W-A |              |              |              |
| YBR201C-A |              |              |              |
| YBR201W   | -0.098824    | -0.151307655 | -0.099946345 |
| YBR202W   | 7.354983659  | 3.841184477  | 2.827838236  |
| YBR203W   | 0.518037826  | 0.117725268  | 0.871095416  |
| YBR204C   | -0.653602144 | -0.008751328 | -1.188841713 |
| YBR205W   | 0.605111812  | -0.098838616 | 0.900408238  |
| YBR206W   | 0.083710575  | -0.005194776 | 0.086170779  |
| YBR207W   | 0.043551985  | 0.55127843   | 0.062815155  |
| YBR208C   | 0.087471111  | 0.251907379  | 0.076755339  |
| YBR209W   | -0.228255421 | -0.00901894  | -0.247542767 |
| YBR210W   | -0.025174119 | -0.629259375 | -0.030510904 |
| YBR211C   | 0.978171505  | -0.137750431 | 1.340375808  |
| YBR212W   | 0.604010907  | 0.430571752  | 0.869437974  |
| YBR213W   | 0.102209974  | -0.579870188 | 0.116420929  |
| YBR214W   | -0.584867682 | -0.02028394  | -0.726909905 |
| YBR215W   | -0.109480345 | -0.385764706 | -0.131266094 |
| YBR216C   | -1.18259082  | 0.036471653  | -1.573963655 |
| YBR217W   | -1.112033039 | 0.440201873  | -1.354793116 |
| YBR218C   | 0.115943257  | -0.247408397 | 0.169676548  |
| YBR219C   | -0.055912167 | -0.235273798 | -0.061621356 |
| YBR220C   | -0.248538358 | 0.418871958  | -0.410185003 |
| YBR221C   | 0.028586546  | 0.019109332  | 0.030697817  |
| YBR221W-A |              |              |              |

|           |              |              |              |
|-----------|--------------|--------------|--------------|
| YBR222C   | -0.045060073 | 0.05004774   | -0.06244304  |
| YBR223C   | 0.236588346  | 0.578598357  | 0.326917906  |
| YBR223W-A |              |              |              |
| YBR224W   | -1.25916885  | -2.29063359  | -1.263802857 |
| YBR225W   | -0.652007755 | -1.846619455 | -0.544735939 |
| YBR226C   | -1.368160604 | -0.008196904 | -1.73868957  |
| YBR227C   | 0.010804785  | -0.139557608 | 0.011964808  |
| YBR228W   | 0.01733098   | -0.014652061 | 0.024537936  |
| YBR229C   | -0.023905534 | -0.083233316 | -0.031351092 |
| YBR230C   | 0.372167643  | -0.173711344 | 0.633848594  |
| YBR230W-A |              |              |              |
| YBR231C   | -0.082888384 | -0.673324238 | -0.093789249 |
| YBR232C   | 0.005524692  | -0.016839457 | 0.008810242  |
| YBR233W   | 0.061305078  | 0.05271089   | 0.062102013  |
| YBR233W-A |              |              |              |
| YBR234C   | 0.146617724  | -0.012495198 | 0.232083704  |
| YBR235W   | 0.573244046  | 0.012905006  | 0.959274276  |
| YBR236C   | -0.052057522 | -1.07346256  | -0.056300832 |
| YBR237W   | -0.031389615 | -0.216568446 | -0.040590577 |
| YBR238C   | -0.239873598 | -0.064788714 | -0.225871158 |
| YBR239C   | -1.002151559 | -0.082233195 | -1.313518181 |
| YBR240C   | 0.008298402  | -1.094678064 | 0.00990998   |
| YBR241C   | 0.007471621  | -0.060221641 | 0.011692213  |
| YBR242W   | 0.001946574  | 0.009857023  | 0.002107224  |
| YBR243C   | 0.313673676  | 0.007607615  | 0.447025389  |
| YBR244W   | 0.020822701  | 1.505708587  | 0.021337881  |
| YBR245C   | -3.460220054 | -2.579646714 | -3.065985603 |
| YBR246W   | -5.821471791 | -3.117305062 | -4.854791818 |
| YBR247C   | 2.941790428  | 2.878130334  | 1.715349447  |
| YBR248C   | -1.866066514 | -0.221501669 | -1.501342763 |
| YBR249C   | -0.114478233 | 0.239621078  | -0.149779484 |
| YBR250W   | -0.219834355 | 0.13741964   | -0.236672342 |
| YBR251W   | 0.05302123   | 0.140497791  | 0.066749426  |
| YBR252W   | -0.008645264 | -0.017218675 | -0.010101417 |
| YBR253W   | -0.20849942  | 0.021036171  | -0.285608959 |
| YBR254C   | 0.350388907  | 0.132585704  | 0.463259159  |
| YBR255C-A |              |              |              |
| YBR255W   | -0.036880755 | -0.017396658 | -0.037973898 |
| YBR256C   | 1.212444153  | 0.350710137  | 1.575090993  |
| YBR257W   | 3.147183547  | 2.521886013  | 2.427029025  |
| YBR258C   | -0.202258822 | -0.907280523 | -0.19093666  |
| YBR259W   | 0.644821275  | 0.001666511  | 0.615597049  |
| YBR260C   | 0.019615291  | -0.400235167 | 0.023889277  |
| YBR261C   | 0.082094909  | 0.004328786  | 0.109466786  |
| YBR262C   | -0.008204635 | 0.79155863   | -0.011800427 |
| YBR263W   | -0.035028978 | -0.01830201  | -0.040675119 |
| YBR264C   | -0.001551311 | -2.204052776 | -0.001643087 |
| YBR265W   | -1.622072493 | -0.823941844 | -0.864024413 |
| YBR266C   | 1.718158166  | 1.455136468  | 0.838586868  |
| YBR267W   | 1.499018096  | 3.791402097  | 0.743394588  |
| YBR268W   | 0.008089397  | 1.214767893  | 0.011284093  |
| YBR269C   | 0.394142228  | -1.161179088 | 0.480680777  |
| YBR270C   | -0.521352694 | -0.698395151 | -0.44375877  |

|           |              |              |              |
|-----------|--------------|--------------|--------------|
| YBR271W   | -9.359302008 | -8.169529175 | -4.065872364 |
| YBR272C   | 0.277704164  | -0.081915536 | 0.255636071  |
| YBR273C   | 0.179939806  | 0.135514278  | 0.168198437  |
| YBR274W   |              |              |              |
| YBR275C   | 0.063641465  | -0.029115875 | 0.059280103  |
| YBR276C   | 0.861480722  | -0.039865812 | 1.0663449    |
| YBR277C   | -10.30980343 | -5.716704353 | -4.635810236 |
| YBR278W   | -10.58108128 | -6.80097042  | -5.228365305 |
| YBR279W   | -12.48784148 | -12.5015616  | -5.419194481 |
| YBR280C   | 0.030711868  | -1.956594289 | 0.030229515  |
| YBR281C   | -11.33346461 | -8.782751999 | -5.673818222 |
| YBR282W   | -13.44390362 | -7.95852426  | -5.66765762  |
| YBR283C   | -8.771654688 | -4.872722425 | -3.579252708 |
| YBR284W   | -12.78885494 | -5.988864257 | -6.201984552 |
| YBR285W   | -9.918759639 | -4.167540194 | -5.601660404 |
| YBR286W   | -11.88625654 | -8.103184542 | -5.384336152 |
| YBR287W   | 0.000313294  | 0.027945434  | 0.000334437  |
| YBR288C   | 0.105476911  | -0.097617472 | 0.102390471  |
| YBR289W   | -0.058689036 | -1.811907968 | -0.038920703 |
| YBR290W   | -19.29360184 | -18.2023282  | -6.858646761 |
| YBR291C   | -9.8202799   | -9.124207133 | -4.411761191 |
| YBR292C   | -10.45736778 | -7.48753999  | -5.061063784 |
| YBR293W   | -8.737246178 | -6.827622663 | -4.971895248 |
| YBR294W   | 0.864228856  | 0.404687027  | 0.730127819  |
| YBR295W   | -12.59493324 | -11.23308517 | -4.870534986 |
| YBR296C   | -11.00893741 | -6.143531573 | -5.511701362 |
| YBR296C-A |              |              |              |
| YBR297W   | -15.73310609 | -9.854086762 | -6.010295755 |
| YBR298C   | -11.87090402 | -8.847277044 | -4.906096428 |
| YBR298C-A |              |              |              |
| YBR299W   |              | -0.350364793 |              |
| YBR300C   | -12.24041872 | -6.522894538 | -5.110591586 |
| YBR301W   | 0.34019833   | 0.005551427  | 0.306227917  |
| YBR302C   |              |              |              |
| YCL001W   | 0.283256504  | 1.773413745  | 0.313210285  |
| YCL001W-A | -11.23817552 | -8.972110326 | -4.601899528 |
| YCL001W-B |              |              |              |
| YCL002C   | 0.060799422  | -0.114919784 | 0.071518342  |
| YCL003W   | 0.765857706  | 0.133990868  | 0.734476714  |
| YCL004W   | 0.202502081  | -0.43114375  | 0.292888265  |
| YCL005W   | 0.865849103  | -0.285818387 | 1.127138232  |
| YCL005W-A |              |              |              |
| YCL006C   | -0.549440137 | -1.515032746 | -0.594830924 |
| YCL007C   | -9.5175486   | -4.633655272 | -9.197354029 |
| YCL008C   | -0.0724941   | -2.265087596 | -0.066677786 |
| YCL009C   | 0.259888239  | 0.23634085   | 0.312306572  |
| YCL010C   | 1.910112965  | 0.190962579  | 1.579547179  |
| YCL011C   | -1.156608363 | -2.118262638 | -0.903478918 |
| YCL012C   |              |              |              |
| YCL012W   | 0.132154547  | 0.002691702  | 0.151886772  |
| YCL013W   | 0.306192167  | 0.040148319  | 0.274079562  |
| YCL014W   | 0.034094605  | 2.064749672  | 0.025090374  |
| YCL016C   | -1.742004521 | -0.065365217 | -1.903454645 |

|           |              |              |              |
|-----------|--------------|--------------|--------------|
| YCL017C   | -1.067306281 | 1.15697927   | -0.881724881 |
| YCL018W   |              |              |              |
| YCL021W-A |              |              |              |
| YCL022C   | 0.265615383  | 0.999014821  | 0.191656233  |
| YCL023C   | -0.821210411 | 0.119411676  | -1.083639211 |
| YCL024W   | 2.720219601  | 1.618458804  | 2.060030581  |
| YCL025C   | -0.022062807 | 0.176018125  | -0.0285389   |
| YCL026C   | 0.012323474  | -0.020155936 | 0.015251793  |
| YCL026C-A | 0.705855644  | -0.09750849  | 0.775172823  |
| YCL026C-B |              |              |              |
| YCL027W   | 0.301126317  | 0.921577711  | 0.26196662   |
| YCL028W   | 0.165489498  | 1.66465245   | 0.227842891  |
| YCL029C   | 1.222407158  | 0.296207513  | 1.007848219  |
| YCL030C   | 2.04789048   | 2.352083048  | 1.692369139  |
| YCL031C   |              |              |              |
| YCL032W   | 0.466697266  | 2.595139116  | 0.328171331  |
| YCL033C   | 0.377300916  | 1.363274275  | 0.32008896   |
| YCL034W   | 3.925214133  | 3.647218577  | 2.359743458  |
| YCL035C   | -0.114790232 | 0.011654176  | -0.112378895 |
| YCL036W   | -2.562559702 | 0.233008145  | -0.926008155 |
| YCL037C   | 7.330036934  | 0.210483118  | 2.141616297  |
| YCL038C   | 0.144225846  | 0.050593472  | 0.162108101  |
| YCL039W   | 0.071393306  | -0.044118354 | 0.085151825  |
| YCL040W   | 0.017240913  | -1.521491954 | 0.019537669  |
| YCL041C   | 0.563514481  | 0.1964771    | 0.903850525  |
| YCL042W   | 0.475069196  | 0.076477156  | 0.510236829  |
| YCL043C   | -0.006310227 | 1.702574073  | -0.00497608  |
| YCL044C   | 0.358208046  | 1.941201876  | 0.3783202    |
| YCL045C   | 0.401256508  | 0.273288831  | 0.490428379  |
| YCL046W   | -0.005531773 | 2.49066794   | -0.004227548 |
| YCL047C   | -0.006495363 | 0.008457496  | -0.007390825 |
| YCL048W   | -0.090583285 | 2.147922446  | -0.089406846 |
| YCL048W-A |              |              |              |
| YCL049C   | 1.529864368  | 1.595403421  | 1.249477428  |
| YCL050C   | 0.418458734  | -0.123288048 | 0.645885803  |
| YCL051W   | 0.022930126  | 1.07149292   | 0.02198034   |
| YCL052C   | 0.016025639  | 0.434547747  | 0.016187311  |
| YCL053C   | 0.031715449  | -0.03449318  | 0.020424717  |
| YCL054W   | 0.358518979  | 1.39166136   | 0.291242143  |
| YCL055W   | 1.184489403  | 0.942343746  | 1.067849272  |
| YCL056C   | 0.618637489  | 1.844269663  | 0.677686608  |
| YCL057C-A |              |              |              |
| YCL057W   | 2.192946329  | 0.794341795  | 2.18540263   |
| YCL058C   | 0.217120639  | 0.006256338  | 0.263056257  |
| YCL058W-A |              |              |              |
| YCL059C   | 0.504558966  | 0.032715697  | 0.519762731  |
| YCL060C   | 0.174143094  | 0.280127801  | 0.180173718  |
| YCL061C   | 1.309642365  | 1.583510132  | 1.262575696  |
| YCL062W   | 0.659576499  | 0.732070851  | 0.729568254  |
| YCL063W   | 2.403704214  | 0.656980176  | 1.881645789  |
| YCL064C   | 0.008912667  | 0.431075427  | 0.008860249  |
| YCL065W   |              |              |              |
| YCL066W   |              |              |              |

|           |              |              |              |
|-----------|--------------|--------------|--------------|
| YCL067C   |              |              |              |
| YCL068C   |              |              |              |
| YCL069W   | 0.186081653  | 0.616375432  | 0.214339638  |
| YCL073C   |              |              |              |
| YCL074W   | 0.15090317   | -0.016189512 | 0.164412317  |
| YCL075W   | 0.137921588  | 0.395172306  | 0.176948419  |
| YCL076W   | 0.180122758  | 0.682002658  | 0.256802705  |
| YCR001W   | 0.014548404  | 0.117891033  | 0.015596642  |
| YCR002C   | 0.775088745  | 0.744813427  | 0.564412187  |
| YCR003W   | 0.023093829  | 0.040312659  | 0.03018477   |
| YCR004C   | 0.078929221  | 1.122801342  | 0.068324207  |
| YCR005C   | 0.208200944  | 1.728704904  | 0.170755958  |
| YCR006C   | 14.0766362   | 5.77582033   | 3.865380433  |
| YCR007C   | 2.517929668  | 1.724711474  | 1.659256799  |
| YCR008W   | -1.976082369 | 0.063835694  | -1.167996194 |
| YCR009C   | 2.058141291  | 0.681521547  | 1.622779405  |
| YCR010C   | 0.115055676  | 1.252560416  | 0.102840673  |
| YCR011C   | 0.053238719  | 1.031037044  | 0.04613703   |
| YCR012W   | 0.617584358  | 0.498754326  | 1.04260507   |
| YCR013C   | 0.001350068  | -0.165650987 | 0.001791215  |
| YCR014C   | 0.048073039  | 0.357660836  | 0.052429935  |
| YCR015C   | 0.011887167  | -0.026234332 | 0.017349939  |
| YCR016W   | 0.290340535  | 1.123551747  | 0.337800324  |
| YCR017C   | 0.022149828  | 0.09324938   | 0.025063353  |
| YCR018C   |              |              |              |
| YCR018C-A |              |              |              |
| YCR019W   | -0.078008579 | 2.913367059  | -0.062782593 |
| YCR020C   | 0.522171232  | 1.031795646  | 0.6493997    |
| YCR020C-A | 0.139554401  | 0.76028732   | 0.169580219  |
| YCR020W-B | -12.47849588 | -9.374127778 | -4.606351923 |
| YCR021C   | -0.126205496 | 0.291699158  | -0.126835792 |
| YCR022C   | 0.04902588   | 2.188974202  | 0.05165511   |
| YCR023C   | 0.03324796   | 2.02366285   | 0.039389788  |
| YCR024C   | -13.15985768 | -8.884233035 | -5.473844841 |
| YCR024C-A | -8.46670521  | -7.072158878 | -3.334646763 |
| YCR024C-B |              |              |              |
| YCR025C   | -10.71149391 | -4.521497701 | -5.791348939 |
| YCR026C   | -9.832479498 | -6.752970236 | -4.16329915  |
| YCR027C   | -11.47426842 | -7.682768332 | -5.943485397 |
| YCR028C   | -10.81564882 | -7.431128352 | -4.936461329 |
| YCR028C-A | 0.01693413   | -0.540736929 | 0.010391492  |
| YCR030C   | 1.573965694  | 0.05763555   | 1.320154237  |
| YCR031C   | -10.60259548 | -9.073202376 | -5.824212477 |
| YCR032W   | -1.491688333 | -0.316719533 | -1.299192079 |
| YCR033W   | -0.19458523  | 0.222768511  | -0.153355013 |
| YCR034W   | -15.46780691 | -9.269957395 | -6.486558048 |
| YCR035C   | -0.142753135 | 1.1098049    | -0.057564882 |
| YCR036W   | -16.86004048 | -17.01993635 | -5.645322118 |
| YCR037C   | -11.99126851 | -7.662731413 | -4.857811133 |
| YCR038C   |              |              |              |
| YCR038W-A |              |              |              |
| YCR039C   |              |              |              |
| YCR040W   |              |              |              |

|           |              |              |              |
|-----------|--------------|--------------|--------------|
| YCR041W   |              |              |              |
| YCR042C   |              |              |              |
| YCR043C   | -12.1174755  | -6.321556106 | -6.253555737 |
| YCR044C   | -11.84623759 | -7.593446383 | -5.14086076  |
| YCR045C   | -10.56162732 | -5.710934163 | -5.182346882 |
| YCR045W-A |              |              |              |
| YCR046C   | 0.000703679  | 0.158921107  | 0.000640541  |
| YCR047C   | 0.003263161  | -0.107313774 | 0.003020909  |
| YCR047W-A |              |              |              |
| YCR048W   | 0.061431592  | -0.221112087 | 0.066879412  |
| YCR049C   | -12.40322436 | -10.51502327 | -5.791606156 |
| YCR050C   | -11.47742644 | -7.160771621 | -5.729827218 |
| YCR051W   | -9.479249881 | -9.350494219 | -5.476738648 |
| YCR052W   | -4.899811153 | -7.014805332 | -1.446821272 |
| YCR053W   | -0.042088583 | 0.0249596    | -0.041693375 |
| YCR054C   | -0.298170858 | 0.077711095  | -0.315699768 |
| YCR057C   | 0.166277534  | 0.161588362  | 0.099766605  |
| YCR059C   | -14.02571601 | -9.430929575 | -6.643463537 |
| YCR060W   | -2.074220443 | -2.478313088 | -1.599824607 |
| YCR061W   |              |              |              |
| YCR062W   | -3.442297007 | 0.923237386  | -2.731429392 |
| YCR063W   | -12.28655608 | -8.467601682 | -5.548072622 |
| YCR064C   | -1.669194432 | -0.094272782 | -1.340141922 |
| YCR065W   | -9.165709426 | -4.975486342 | -3.497811572 |
| YCR066W   | -10.99637577 | -7.964703623 | -4.545899324 |
| YCR067C   | -1.58645921  | -0.060669495 | -1.07248856  |
| YCR068W   | -13.23437436 | -8.089931084 | -5.082839052 |
| YCR069W   | 1.507036927  | 0.06471634   | 1.178198598  |
| YCR071C   | -10.30021491 | -8.4542009   | -4.113288889 |
| YCR072C   | 0.881403893  | -0.411213306 | 0.645732717  |
| YCR073C   | 0.026690408  | -3.472673883 | 0.02157639   |
| YCR073W-A | -16.075802   | -6.633233951 | -6.99573611  |
| YCR075C   | -1.292029379 | 0.04587684   | -1.172992914 |
| YCR075W-A |              |              |              |
| YCR076C   | -9.882936263 | -7.886223506 | -4.177463185 |
| YCR077C   | -9.370372276 | -9.746609468 | -3.573174828 |
| YCR079W   | -8.066304872 | -5.581465379 | -5.263416013 |
| YCR081C-A |              |              |              |
| YCR081W   | -7.087081996 | -6.321889119 | -4.553247043 |
| YCR082W   | -15.24257788 | -8.59826663  | -6.297864689 |
| YCR083W   | -0.104066598 | 0.001274536  | -0.108171025 |
| YCR084C   | 3.738166277  | -0.076353069 | 1.919818296  |
| YCR085W   | -10.27356056 | -8.650056515 | -4.908449087 |
| YCR086W   | -9.704357058 | -8.64939984  | -4.106979373 |
| YCR087C-A | -13.79511063 | -8.558391369 | -6.662012394 |
| YCR087W   | -8.700596957 | -6.449522054 | -3.650080289 |
| YCR088W   | -0.883512271 | -1.624603675 | -0.944913441 |
| YCR089W   | 0.015838218  | 0.096073939  | 0.015965435  |
| YCR090C   | 0.025709584  | 0.007294462  | 0.038671122  |
| YCR091W   | 0.018145762  | 0.563572713  | 0.023783237  |
| YCR092C   | 0.052975669  | 0.052803088  | 0.064052164  |
| YCR093W   | 0.024588684  | -2.850145899 | 0.025534336  |
| YCR094W   | 0.020010366  | -0.01915728  | 0.024812579  |



|           |              |              |              |
|-----------|--------------|--------------|--------------|
| YCR095C   | -0.195113308 | 0.194664568  | -0.212168962 |
| YCR095W-A |              |              |              |
| YCR096C   |              |              |              |
| YCR097W   |              |              |              |
| YCR097W-A |              |              |              |
| YCR098C   | 0.014711032  | 0.669396695  | 0.018250085  |
| YCR099C   | -0.001495965 | -0.164262268 | -0.001423242 |
| YCR100C   | 0.328151807  | 0.076576808  | 0.363413625  |
| YCR101C   | 0.054111309  | -0.005063632 | 0.062015184  |
| YCR102C   | 0.212904373  | 0.008915903  | 0.210185214  |
| YCR102W-A | 0.328698606  | 0.419948155  | 0.381554296  |
| YCR104W   |              |              |              |
| YCR105W   | 0.039624291  | 0.531603872  | 0.050367662  |
| YCR106W   | -0.003497185 | 0.643736518  | -0.004268227 |
| YCR107W   | -0.162992676 | -0.087773628 | -0.133316026 |
| YCR108C   |              |              |              |
| YDL001W   | 0.028076341  | -0.01358226  | 0.033516346  |
| YDL002C   | -1.120841328 | 0.147277158  | -1.238590789 |
| YDL003W   | -0.007887799 | -0.000828789 | -0.009920434 |
| YDL004W   | 0.861832928  | -0.584128563 | 0.802845496  |
| YDL005C   | -0.179483954 | -0.20382821  | -0.203924848 |
| YDL006W   | -0.067081825 | -0.20765928  | -0.057348453 |
| YDL007C-A |              |              |              |
| YDL007W   | 4.117725687  | 3.694440603  | 3.983946279  |
| YDL008W   | 0.033501468  | -0.405042147 | 0.038609924  |
| YDL009C   | -0.07415125  | 0.030456355  | -0.087756887 |
| YDL010W   | -1.024952507 | -0.426627059 | -1.006682529 |
| YDL011C   | -0.196885226 | -0.388001555 | -0.236566006 |
| YDL012C   | -1.221741364 | -0.133595985 | -1.430628265 |
| YDL013W   | 2.76242887   | 1.358218861  | 2.577241217  |
| YDL014W   | 4.086621822  | 3.962475127  | 1.833958647  |
| YDL015C   | -0.008435837 | 0.212639737  | -0.009217665 |
| YDL016C   | -0.498101478 | 0.000489257  | -0.579127029 |
| YDL017W   | -0.933916107 | -1.407547473 | -0.936382091 |
| YDL018C   | -0.042275666 | 0.045439551  | -0.047095487 |
| YDL019C   | -0.105350103 | -0.104716414 | -0.101759731 |
| YDL020C   | -5.960346206 | -0.890394498 | -3.900678572 |
| YDL021W   | 0.268079805  | -0.004968463 | 0.256560269  |
| YDL022C-A |              |              |              |
| YDL022W   | 3.416429031  | 0.603221721  | 2.623539674  |
| YDL023C   | 0.090229044  | -1.862275323 | 0.094147342  |
| YDL024C   | -0.12117712  | 0.011637711  | -0.145977037 |
| YDL025C   | 0.037814968  | 0.029172457  | 0.043598541  |
| YDL025W-A |              |              |              |
| YDL026W   |              |              |              |
| YDL027C   | 0.103019905  | 0.018588961  | 0.127086277  |
| YDL028C   | 0.016792882  | 1.05493181   | 0.023368247  |
| YDL029W   | -0.05625724  | -0.402829878 | -0.05322741  |
| YDL030W   | 0.556114953  | 0.006686994  | 0.613317008  |
| YDL031W   | 0.035254322  | 0.289836687  | 0.042082266  |
| YDL032W   | 0.019023016  | 1.237581143  | 0.017079799  |
| YDL033C   | -0.038203259 | 0.03982085   | -0.044398233 |
| YDL034W   | 4.465892627  | 5.726675059  | 2.177455266  |

|           |              |              |              |
|-----------|--------------|--------------|--------------|
| YDL035C   | -0.010929531 | -0.577803676 | -0.008874825 |
| YDL036C   |              |              |              |
| YDL037C   | -0.118629221 | 0.003004966  | -0.147937232 |
| YDL038C   | -0.011492695 | -0.10241074  | -0.014303948 |
| YDL039C   | 0.01976023   | 0.037375063  | 0.025943365  |
| YDL040C   | 0.127923029  | 1.041411824  | 0.166526341  |
| YDL041W   | 0.694019973  | 0.155967246  | 0.626046304  |
| YDL042C   | 0.112436577  | 0.054261382  | 0.07167164   |
| YDL043C   | 9.536013414  | 4.259254362  | 4.07081469   |
| YDL044C   | -0.085151375 | 0.164812256  | -0.088108024 |
| YDL045C   | 0.004766159  | 0.240065427  | 0.005225057  |
| YDL045W-A | 4.655359692  | 0.34553681   | 3.547645928  |
| YDL046W   | -0.232778328 | -0.081021182 | -0.30171684  |
| YDL047W   | 3.53866651   | -0.125477288 | 3.168456734  |
| YDL048C   | -1.555888657 | -1.182610978 | -1.850108778 |
| YDL049C   | -0.114666161 | 0.043480367  | -0.163106705 |
| YDL050C   | -1.191448942 | 0.084975485  | -1.449565517 |
| YDL051W   | -0.071774627 | 0.00699823   | -0.081225557 |
| YDL052C   | 0.700820158  | 0.230202021  | 0.813636543  |
| YDL053C   | -2.720564772 | -0.15871087  | -2.575760263 |
| YDL054C   | -0.065160187 | 0.047738383  | -0.076991969 |
| YDL055C   | 0.382477115  | 0.190823587  | 0.478900873  |
| YDL056W   | -1.051259765 | -0.091341659 | -1.198915704 |
| YDL057W   | 0.434059187  | 0.003651398  | 0.437959594  |
| YDL058W   | 0.083650987  | -0.018291319 | 0.111495745  |
| YDL059C   | -0.123332316 | -0.119618672 | -0.120248564 |
| YDL060W   | 1.430713471  | 1.730118762  | 1.253154298  |
| YDL061C   | 4.379189076  | 3.059468365  | 1.386082387  |
| YDL062W   | 0.009591578  | -0.15723788  | 0.011020834  |
| YDL063C   | -0.015502394 | 0.132556474  | -0.018293266 |
| YDL064W   | 1.023465811  | -0.181283048 | 0.939388941  |
| YDL065C   | -0.110884532 | -0.175438695 | -0.096420772 |
| YDL066W   | 0.080183052  | 0.003928493  | 0.075650944  |
| YDL067C   | 0.098205097  | 0.592900615  | 0.110637131  |
| YDL068W   | 0.198359532  | -0.003579597 | 0.257010404  |
| YDL069C   |              |              |              |
| YDL070W   | -1.688711173 | -1.664170441 | -1.598814102 |
| YDL071C   | -1.617075354 | -0.007041628 | -1.738242258 |
| YDL072C   | 0.764570266  | -0.766652026 | 0.941616826  |
| YDL073W   | 0.469792529  | -0.137661995 | 0.524717781  |
| YDL074C   | 2.205096688  | 1.928986751  | 2.359862055  |
| YDL075W   | 5.909736847  | -6.57512917  | 2.056456335  |
| YDL076C   | -0.942170532 | 0.003126375  | -0.778253855 |
| YDL077C   | 0.747503928  | 0.293314779  | 0.432862043  |
| YDL078C   | 0.01800518   | 0.033960389  | 0.021412433  |
| YDL079C   | 0.259628467  | 0.009963911  | 0.316894768  |
| YDL080C   | 0.016614305  | 0.086892253  | 0.019174     |
| YDL081C   | 0.381562661  | 0.270885568  | 0.112944126  |
| YDL082W   | 0.371820201  | -0.158537155 | 0.199297666  |
| YDL083C   | 4.674048777  | 1.269068182  | 1.61754908   |
| YDL084W   | -6.868111812 | -0.062463218 | -5.677921455 |
| YDL085C-A |              |              |              |
| YDL085W   | -0.126677368 | -0.118608893 | -0.174175316 |

|           |              |              |              |
|-----------|--------------|--------------|--------------|
| YDL086C-A |              |              |              |
| YDL086W   | -0.000709417 | 0.082148556  | -0.000967218 |
| YDL087C   | -0.103572453 | 0.4921369    | -0.111476728 |
| YDL088C   | 0.067119673  | -0.039636128 | 0.075682379  |
| YDL089W   | -1.683839627 | 1.139834072  | -1.00779147  |
| YDL090C   | -0.151354344 | -0.003874938 | -0.124778379 |
| YDL091C   | -1.582737993 | -0.004542002 | -1.145560877 |
| YDL092W   | -0.308873833 | 1.782446305  | -0.227687647 |
| YDL093W   | 0.769206924  | -0.048346738 | 0.591329017  |
| YDL094C   | -0.088540105 | -0.431518634 | -0.060509198 |
| YDL095W   | 0.066699683  | 1.584638881  | 0.068703647  |
| YDL096C   | -2.314978452 | -0.023323887 | -2.435940595 |
| YDL097C   | 5.409234032  | 3.975973836  | 4.028560051  |
| YDL098C   | 0.029784188  | -0.012824499 | 0.039668141  |
| YDL099W   | 0.777345959  | 0.193766612  | 0.820745483  |
| YDL100C   | -0.932008625 | 0.028981692  | -1.204815322 |
| YDL101C   | 0.036204667  | 0.144126608  | 0.048477412  |
| YDL102W   | -0.473287281 | -0.244110638 | -0.477694222 |
| YDL103C   | 0.044029434  | 0.598780316  | 0.039764303  |
| YDL104C   | -0.076184564 | 0.738464367  | -0.114834407 |
| YDL105W   | 0.681348581  | 0.043907557  | 0.81452867   |
| YDL106C   | -1.700201885 | -0.125492265 | -1.488433875 |
| YDL107W   | -0.036377735 | 0.037596332  | -0.044362552 |
| YDL108W   | -0.039647834 | 0.053651797  | -0.044807541 |
| YDL109C   | -0.427582089 | -0.003298334 | -0.433668238 |
| YDL110C   | -0.648450734 | 0.069471519  | -0.883337496 |
| YDL111C   | 6.722907226  | 6.796366149  | 2.572990953  |
| YDL112W   | -0.047101776 | -0.070302127 | -0.074882235 |
| YDL113C   | 0.11583797   | 0.227084732  | 0.140760865  |
| YDL114W   | 0.35645385   | 0.362820599  | 0.460738685  |
| YDL114W-A |              |              |              |
| YDL115C   | -0.781496552 | 0.333966562  | -0.772189636 |
| YDL116W   | 2.563536893  | 0.361130898  | 1.320157759  |
| YDL117W   | -0.071818766 | 0.009757611  | -0.058420364 |
| YDL118W   | -0.128550792 | 0.091882005  | -0.157688209 |
| YDL119C   | -0.232149007 | 0.141639196  | -0.311376883 |
| YDL120W   | -0.19312775  | 0.571734273  | -0.214046286 |
| YDL121C   | 0.041751058  | 0.160885361  | 0.05845069   |
| YDL122W   | 0.096225004  | 0.025877207  | 0.10664501   |
| YDL123W   | -0.090592035 | 0.002511899  | -0.110510419 |
| YDL124W   | -0.119390956 | -0.003240427 | -0.130224337 |
| YDL125C   | 0.004080384  | -0.00827988  | 0.003528596  |
| YDL126C   | 0.462993489  | -0.06962894  | 0.491067635  |
| YDL127W   | -0.158323148 | -0.373144371 | -0.153653407 |
| YDL128W   | -0.003376941 | 0.006121203  | -0.004176982 |
| YDL129W   | -0.041138852 | 1.6188867    | -0.04476203  |
| YDL130W   | -1.715207405 | 0.045586234  | -1.512585666 |
| YDL130W-A | 0.031597102  | 0.009981536  | 0.04443628   |
| YDL131W   | 0.104549327  | 0.036032361  | 0.151662132  |
| YDL132W   | -0.052656294 | -0.85795866  | -0.059512467 |
| YDL133C-A | 0.049861929  | -0.040781707 | 0.061564662  |
| YDL133W   | 0.831772114  | -1.034841817 | 1.015509611  |
| YDL134C   | -0.115216993 | -0.314349714 | -0.102662728 |

|           |              |              |              |
|-----------|--------------|--------------|--------------|
| YDL134C-A | -0.018159067 | 0.035906557  | -0.019380331 |
| YDL135C   | -0.081178682 | -0.215675545 | -0.076272318 |
| YDL136W   | 0.902341374  | 0.588530776  | 0.555793831  |
| YDL137W   | -2.285711826 | -0.161936234 | -2.241257355 |
| YDL138W   | -0.02335336  | -0.128875318 | -0.030367597 |
| YDL139C   | -0.104970774 | 0.156144273  | -0.116018337 |
| YDL140C   | -5.553180307 | -0.074777568 | -4.080153981 |
| YDL141W   | -1.604825163 | -0.609535876 | -1.692920129 |
| YDL142C   | -1.845379488 | -0.111437592 | -1.945948076 |
| YDL143W   | -2.839442823 | -0.746121715 | -1.191145975 |
| YDL144C   | 2.967766129  | 2.535359156  | 1.500222607  |
| YDL145C   | 0.220275974  | -2.279658397 | 0.233091948  |
| YDL146W   | -0.255806205 | -0.03557076  | -0.304023104 |
| YDL147W   | 6.397486585  | 2.932030826  | 4.858182642  |
| YDL148C   | -0.234559833 | 0.567161288  | -0.288079223 |
| YDL149W   | -0.066750172 | -0.015874731 | -0.076007855 |
| YDL150W   | 15.02620801  | 9.242134151  | 4.432973565  |
| YDL151C   | 7.861213634  | 3.166562918  | 3.235929041  |
| YDL152W   | 11.38489394  | 6.359601581  | 4.099042991  |
| YDL153C   | 0.481868267  | 0.711003679  | 0.708353923  |
| YDL154W   | -0.003386169 | -0.104050714 | -0.004268509 |
| YDL155W   | -0.006740154 | -1.45441261  | -0.00846254  |
| YDL156W   | 1.02900951   | 1.031764686  | 0.929567631  |
| YDL157C   | 0.075054593  | 0.290145533  | 0.069659164  |
| YDL158C   | -0.027353185 | 0.030483988  | -0.021358314 |
| YDL159C-B |              |              |              |
| YDL159W   | -0.806060115 | -2.263066978 | -0.669582681 |
| YDL159W-A |              |              |              |
| YDL160C   | 6.690885094  | 1.483094736  | 3.722171012  |
| YDL160C-A |              |              |              |
| YDL161W   | -0.867213992 | -2.315750073 | -0.732000181 |
| YDL162C   | -0.006495605 | 0.035428301  | -0.008456723 |
| YDL163W   | 1.285285884  | -0.023167601 | 1.1612366    |
| YDL164C   | -0.02938347  | -0.014631718 | -0.038529486 |
| YDL165W   | -1.488102874 | -1.901344188 | -1.262202213 |
| YDL166C   | 0.008819845  | 0.083898277  | 0.010553058  |
| YDL167C   | 0.242499476  | -0.018166304 | 0.256380642  |
| YDL168W   | 1.102751206  | 1.022929597  | 1.035215885  |
| YDL169C   | -0.016014321 | -0.281613876 | -0.018891544 |
| YDL170W   | 0.005469173  | 0.4793502    | 0.005888274  |
| YDL171C   | -0.238725575 | 0.019485304  | -0.249363852 |
| YDL172C   | 0.002867631  | 0.010254883  | 0.00243899   |
| YDL173W   | -0.015017666 | -0.048481271 | -0.011099591 |
| YDL174C   | -1.355636271 | -2.272206615 | -1.141890455 |
| YDL175C   | -0.51423137  | -0.326576176 | -0.438136211 |
| YDL176W   | -0.017618985 | 0.129288683  | -0.017673798 |
| YDL177C   | 0.037421001  | -0.757638966 | 0.042480494  |
| YDL178W   | -0.034014026 | 0.039562789  | -0.035932849 |
| YDL179W   | 0.045424942  | 1.553888801  | 0.041540989  |
| YDL180W   | -0.000696848 | -0.412827132 | -0.000797615 |
| YDL181W   | 0.181164249  | 0.377702459  | 0.156549333  |
| YDL182W   | 0.25400552   | 0.213471981  | 0.216014977  |
| YDL183C   | 0.087533576  | -0.045572994 | 0.087331442  |

|           |              |              |              |
|-----------|--------------|--------------|--------------|
| YDL184C   | 0.022578008  | -0.515733585 | 0.018560668  |
| YDL185C-A |              |              |              |
| YDL185W   | -2.880055308 | -5.746588801 | -3.011107259 |
| YDL186W   | -0.832835345 | -1.207566152 | -0.898612398 |
| YDL187C   | 0.209186844  | 0.030810111  | 0.178753468  |
| YDL188C   | -0.841825114 | -0.054144987 | -1.195044105 |
| YDL189W   | 0.408162608  | -0.03291962  | 0.378717786  |
| YDL190C   | -0.341787038 | -0.094830756 | -0.3421043   |
| YDL191W   | 7.447660819  | 7.976060379  | 1.591882094  |
| YDL192W   | -6.359746083 | -8.668115468 | -3.695052556 |
| YDL193W   |              |              |              |
| YDL194W   | -0.017803355 | -0.717760892 | -0.016751011 |
| YDL195W   | 4.848654536  | 3.04191186   | 4.200293052  |
| YDL196W   | 6.141760674  | 3.6495578    | 3.858061194  |
| YDL197C   | -0.822900189 | 0.805182431  | -1.09899607  |
| YDL198C   | -1.760735523 | 0.070167189  | -0.794359724 |
| YDL199C   | 0.074688371  | -0.07473309  | 0.077575494  |
| YDL200C   | -0.056828451 | -0.02379536  | -0.055403098 |
| YDL201W   | 0.061945715  | -0.25691552  | 0.060001364  |
| YDL202W   | -1.966987435 | -0.07838086  | -1.390348445 |
| YDL203C   | -0.109731535 | 1.051603762  | -0.078587988 |
| YDL204W   | 0.009744242  | -2.418948659 | 0.0092054    |
| YDL205C   | -3.780271419 | -0.184369851 | -3.775419802 |
| YDL206W   | -1.981970709 | -0.27543892  | -2.140804897 |
| YDL207W   | 0.050136385  | 0.296729554  | 0.040254554  |
| YDL208W   | 0.231899613  | 0.051075032  | 0.20475384   |
| YDL209C   | 0.017868309  | -1.479683912 | 0.02007401   |
| YDL210W   | -0.316133023 | 0.029058824  | -0.299092548 |
| YDL211C   | -1.659286221 | 0.008063138  | -0.866373945 |
| YDL212W   | 0.044033484  | 0.004157603  | 0.050116657  |
| YDL213C   | -0.011428346 | 0.036309073  | -0.011487088 |
| YDL214C   | 0.018406723  | -0.016135182 | 0.023045019  |
| YDL215C   | -1.043758903 | -3.697204354 | -0.763366602 |
| YDL216C   | 0.041546675  | 0.048635961  | 0.041743411  |
| YDL217C   | 0.034715602  | 0.338906889  | 0.040207374  |
| YDL218W   | -0.856981132 | 0.015125865  | -0.844211822 |
| YDL219W   | 1.736778126  | -1.518156542 | 1.737166335  |
| YDL220C   | -0.047141108 | -0.044378222 | -0.055695569 |
| YDL221W   | -0.000237515 | 0.011338082  | -0.000228746 |
| YDL222C   | 0.05579111   | -0.007486471 | 0.062999481  |
| YDL223C   | 0.220958996  | 0.150736707  | 0.117916089  |
| YDL224C   | -0.302784371 | 0.045724001  | -0.329240341 |
| YDL225W   | -0.001523704 | -0.013850785 | -0.001835618 |
| YDL226C   | 2.798623071  | 1.759503212  | 2.975049429  |
| YDL227C   | -0.003560865 | 0.020115573  | -0.003927824 |
| YDL228C   |              |              |              |
| YDL229W   | -0.641853613 | 1.576490168  | -0.568606146 |
| YDL230W   | -0.276766825 | 1.786571572  | -0.257060735 |
| YDL231C   | -1.436667214 | -0.019976336 | -1.377026007 |
| YDL232W   | -0.27532654  | 0.002484971  | -0.266771338 |
| YDL233W   | -0.873966275 | -0.083036936 | -1.074572168 |
| YDL234C   | -0.197131247 | 0.08362022   | -0.189354994 |
| YDL235C   | -0.037884166 | -0.022326421 | -0.043636095 |

|           |              |              |              |
|-----------|--------------|--------------|--------------|
| YDL236W   | 0.016335365  | -0.075326664 | 0.015890972  |
| YDL237W   | -0.026297118 | -0.533419267 | -0.028799738 |
| YDL238C   | 0.043301942  | -0.010534863 | 0.043183224  |
| YDL239C   | 0.04639192   | 0.008708778  | 0.030684378  |
| YDL240C-A |              |              |              |
| YDL240W   | 0.00791491   | -0.683560477 | 0.007276698  |
| YDL241W   | 0.009136739  | 0.015577683  | 0.010728898  |
| YDL242W   | 0.028640207  | 0.232585589  | 0.031682808  |
| YDL243C   | -0.250781104 | 0.196787351  | -0.279512572 |
| YDL244W   |              |              |              |
| YDL245C   |              |              |              |
| YDL246C   |              |              |              |
| YDL247W   |              |              |              |
| YDL247W-A |              |              |              |
| YDL248W   |              |              |              |
| YDR001C   | 0.363194452  | -0.014976209 | 0.429822494  |
| YDR002W   | -0.005026809 | 0.956822994  | -0.004717613 |
| YDR003W   | 0.033195841  | -0.081310673 | 0.034983526  |
| YDR003W-A |              |              |              |
| YDR004W   | -0.040070533 | 0.024158366  | -0.041703206 |
| YDR005C   | -8.500519078 | 0.078303904  | -5.977910784 |
| YDR006C   | -0.09490981  | 0.026563255  | -0.070198809 |
| YDR007W   | -0.617853597 | -0.093529417 | -0.63079677  |
| YDR008C   | 0.11206517   | -0.032431981 | 0.118566812  |
| YDR009W   | 0.788689882  | -0.042730605 | 0.876362243  |
| YDR010C   | 0.487975152  | 0.913120159  | 0.463080079  |
| YDR011W   | 1.587533315  | 0.187422714  | 1.540617303  |
| YDR012W   |              |              |              |
| YDR013W   | -0.315368046 | -0.546607394 | -0.311633703 |
| YDR014W   | -1.61417823  | 0.006815973  | -1.770599677 |
| YDR014W-A |              |              |              |
| YDR015C   | -0.004237912 | -0.036511779 | -0.004664586 |
| YDR016C   | -0.004204026 | 0.211514177  | -0.004711235 |
| YDR017C   | -0.695660888 | -0.039060717 | -0.524383074 |
| YDR018C   | -0.866637879 | 0.148765946  | -0.802079523 |
| YDR019C   | -0.017828346 | -0.132885247 | -0.020885903 |
| YDR020C   | -0.275010759 | -0.90141431  | -0.227380305 |
| YDR021W   | -0.026197546 | 0.071825924  | -0.030086573 |
| YDR022C   | -0.004907801 | 0.044739515  | -0.004055535 |
| YDR023W   | 0.058489466  | -1.25956895  | 0.064348646  |
| YDR024W   | 2.979641122  | 1.1516591    | 1.17191678   |
| YDR025W   | 5.105674057  | 1.789895348  | 1.95795846   |
| YDR026C   | 0.011705129  | -0.025473789 | 0.014930335  |
| YDR027C   |              |              |              |
| YDR028C   | -0.016853635 | -0.284873675 | -0.023078618 |
| YDR029W   | 0.416957369  | 0.167161153  | 0.368813885  |
| YDR030C   | -0.517034897 | -0.380920738 | -0.525614951 |
| YDR031W   | 0.150888936  | 0.006902472  | 0.165421723  |
| YDR032C   | -0.324024688 | 0.007817784  | -0.320500052 |
| YDR033W   |              |              |              |
| YDR034C   | -0.004519566 | -0.004156492 | -0.004984059 |
| YDR034C-A |              |              |              |
| YDR034W-B |              |              |              |

|           |              |              |              |
|-----------|--------------|--------------|--------------|
| YDR035W   | -0.773392866 | 0.428485413  | -0.674723942 |
| YDR036C   | -1.011592979 | 0.025411097  | -1.291969682 |
| YDR037W   | -0.055747287 | -0.026878309 | -0.06517465  |
| YDR038C   |              |              |              |
| YDR039C   |              |              |              |
| YDR040C   |              |              |              |
| YDR041W   | 0.02401467   | 0.337841191  | 0.025946464  |
| YDR042C   | -0.118102951 | 0.057297259  | -0.159630083 |
| YDR043C   | -0.062127652 | -0.012282436 | -0.082759211 |
| YDR044W   | -0.229725495 | 0.410805094  | -0.331246983 |
| YDR045C   | -19.91705419 | -23.57087058 | -13.28550495 |
| YDR046C   | 0.274762114  | 0.025099891  | 0.269152668  |
| YDR047W   | -2.314653429 | -0.766283247 | -1.864120547 |
| YDR048C   | -0.024719112 | -0.15399046  | -0.025016533 |
| YDR049W   | 0.483145388  | -0.149908978 | 0.642438319  |
| YDR050C   | 1.010349674  | 0.529180222  | 1.146130818  |
| YDR051C   | -0.67276711  | 0.088808701  | -0.867448594 |
| YDR052C   | -19.46051923 | -16.52172866 | -7.355190193 |
| YDR053W   | 0.088076158  | -1.140664201 | 0.10334545   |
| YDR054C   | -0.294165951 | -0.111275788 | -0.269561083 |
| YDR055W   | -0.040745335 | -0.026165382 | -0.029626203 |
| YDR056C   | -0.008244906 | -0.977808768 | -0.010455473 |
| YDR057W   | 0.367191801  | -0.125573936 | 0.356871804  |
| YDR058C   | -0.904379337 | -0.030168569 | -1.160237391 |
| YDR059C   | 0.794169946  | 0.061713971  | 0.928196011  |
| YDR060W   | 4.788492759  | 3.445877444  | 2.381430531  |
| YDR061W   | -0.010352347 | 0.000572329  | -0.010260149 |
| YDR062W   | -0.714192827 | 0.293383875  | -0.964960693 |
| YDR063W   | 0.064978858  | 0.044491449  | 0.089891893  |
| YDR064W   | 3.193647344  | 6.48521002   | 0.996182413  |
| YDR065W   | 0.018897931  | 0.364998792  | 0.018684733  |
| YDR066C   |              |              |              |
| YDR067C   | 0.166823267  | -0.02168137  | 0.146900146  |
| YDR068W   | 0.424290324  | -0.027277624 | 0.436097765  |
| YDR069C   | 0.846061137  | 0.893414215  | 0.823455666  |
| YDR070C   | -0.043019564 | -0.008684786 | -0.044170196 |
| YDR071C   | 0.129630047  | -1.52208011  | 0.109335599  |
| YDR072C   | 1.763962336  | 4.821312527  | 1.515846858  |
| YDR073W   | -3.944690337 | -0.717018235 | -3.327019622 |
| YDR074W   | -0.679208386 | -1.046081612 | -0.655068616 |
| YDR075W   | -1.993417479 | -1.105333635 | -1.426910207 |
| YDR076W   | -0.119807987 | 0.145267145  | -0.152423334 |
| YDR077W   | -0.19039672  | -10.11095131 | -0.022662238 |
| YDR078C   | 0.079565321  | -0.002058561 | 0.105946069  |
| YDR079C-A |              |              |              |
| YDR079W   | -0.103450782 | 0.064800744  | -0.119505053 |
| YDR080W   | 1.00955389   | -0.806381574 | 1.36255281   |
| YDR081C   | -0.179044757 | 0.821360937  | -0.22570451  |
| YDR082W   | -3.447800489 | -0.195470512 | -2.700883063 |
| YDR083W   | -0.017883017 | -1.44320772  | -0.021057827 |
| YDR084C   | -0.284313458 | 0.036993565  | -0.280422727 |
| YDR085C   | 0.131969512  | -0.020876876 | 0.159089033  |
| YDR086C   | 0.090876627  | 0.850721162  | 0.087447586  |

|           |              |              |              |
|-----------|--------------|--------------|--------------|
| YDR087C   | -0.034430924 | 0.373908437  | -0.033300777 |
| YDR088C   | -0.172603177 | 0.257218914  | -0.256850043 |
| YDR089W   | 0.024670662  | 0.251057519  | 0.036806199  |
| YDR090C   |              |              |              |
| YDR091C   | 2.970941501  | 0.046754984  | 3.046463585  |
| YDR092W   |              |              |              |
| YDR093W   | -2.26711844  | 1.591144133  | -2.887050209 |
| YDR094W   | -1.652430718 | -0.521572624 | -1.98162715  |
| YDR095C   | -2.003614602 | 1.952203108  | -2.424307295 |
| YDR096W   | 0.020966233  | 1.478004944  | 0.021641945  |
| YDR097C   | 0.03159268   | 0.658591015  | 0.039199458  |
| YDR098C   | -0.67802315  | 0.627346422  | -0.82972296  |
| YDR099W   | -0.015236563 | 0.067494413  | -0.015534353 |
| YDR100W   | -0.013199289 | -0.929341444 | -0.017581521 |
| YDR101C   | 0.829207362  | 1.337465552  | 0.765461239  |
| YDR102C   | 0.247726784  | 0.123254215  | 0.256277689  |
| YDR103W   | -0.088323395 | 0.244925418  | -0.10891453  |
| YDR104C   | -0.127325235 | 0.011128467  | -0.152913017 |
| YDR105C   | 1.500165819  | -1.347301033 | 1.40324766   |
| YDR106W   |              |              |              |
| YDR107C   | 0.105608473  | -0.036275365 | 0.141033188  |
| YDR108W   | 0.06121647   | 0.676808201  | 0.073140015  |
| YDR109C   | -0.037172047 | 0.046930052  | -0.050307497 |
| YDR110W   | 0.05725559   | 0.654457508  | 0.060948228  |
| YDR111C   | 0.731937086  | -0.005273288 | 0.820807292  |
| YDR112W   | -0.033441508 | 0.191802584  | -0.040604515 |
| YDR113C   | 0.723809305  | -0.534358586 | 0.84231316   |
| YDR114C   | 0.41271355   | 0.026530509  | 0.373094415  |
| YDR115W   | 0.651366718  | 4.027416575  | 0.433059607  |
| YDR116C   | 0.007138971  | -0.216891277 | 0.007439085  |
| YDR117C   | 0.011213693  | -0.066105019 | 0.009788065  |
| YDR118W   | 0.131323251  | -0.176142653 | 0.190134169  |
| YDR118W-A |              |              |              |
| YDR119W   | 0.126782839  | -0.025447455 | 0.161785794  |
| YDR119W-A |              |              |              |
| YDR120C   | -0.322286835 | -0.024526719 | -0.325306878 |
| YDR121W   | -0.003376135 | 0.050560156  | -0.003960179 |
| YDR122W   | -0.12724141  | -0.109233659 | -0.180932842 |
| YDR123C   | 0.463372936  | 0.20228978   | 0.677589441  |
| YDR124W   | -0.463883589 | 0.040228489  | -0.65186277  |
| YDR125C   | 0.098219118  | 0.014638561  | 0.103556558  |
| YDR126W   | -0.232611721 | -0.056974687 | -0.235225497 |
| YDR127W   | 0.008199903  | -0.193820455 | 0.008809588  |
| YDR128W   | 0.074403788  | 0.058998901  | 0.070813329  |
| YDR129C   | 0.05011221   | -0.070272222 | 0.052435027  |
| YDR130C   | -1.008640603 | -0.216235178 | -0.812478141 |
| YDR131C   | -0.076455908 | -0.157268762 | -0.077383842 |
| YDR132C   | 0.275856555  | 0.014207282  | 0.300563535  |
| YDR133C   | -0.010355272 | 0.082709131  | -0.009560186 |
| YDR134C   | 0.037018518  | -0.223078043 | 0.046554393  |
| YDR135C   | 0.108983497  | -0.033056864 | 0.110443092  |
| YDR136C   | 0.133571621  | 0.153459089  | 0.122785953  |
| YDR137W   | 0.004603276  | 0.003589251  | 0.005961467  |



|           |              |              |              |
|-----------|--------------|--------------|--------------|
| YDR138W   | -0.108613224 | -0.008109131 | -0.121176717 |
| YDR139C   | 0.006019147  | 0.014797875  | 0.006328133  |
| YDR140W   | 1.420492843  | 1.072643226  | 1.213512916  |
| YDR141C   | -0.122917926 | -0.017331432 | -0.101998158 |
| YDR142C   | 0.074236471  | 0.229634649  | 0.093063928  |
| YDR143C   | 0.082473705  | -1.149541943 | 0.093167011  |
| YDR144C   | -0.070837161 | 0.036529286  | -0.09718398  |
| YDR145W   | -0.082446357 | 0.12088363   | -0.050116709 |
| YDR146C   | 0.807189434  | 0.570741741  | 0.737946806  |
| YDR147W   |              |              |              |
| YDR148C   | -0.331801677 | 1.64460283   | -0.34871352  |
| YDR149C   | -0.097640079 | -0.030681422 | -0.123596602 |
| YDR150W   | 0.025588382  | 0.040241118  | 0.036247125  |
| YDR151C   | -3.807765907 | 0.056275955  | -2.894145314 |
| YDR152W   | 0.015463859  | 0.095272967  | 0.020559703  |
| YDR153C   | -0.037809259 | -0.627550913 | -0.04181573  |
| YDR154C   | -0.481062565 | -0.104592308 | -0.58478487  |
| YDR155C   | 0.019779015  | -0.046886217 | 0.016774012  |
| YDR156W   | -7.755915706 | -0.138355087 | -1.851542904 |
| YDR157W   | 0.33505683   | -1.367349134 | 0.259032415  |
| YDR158W   | 0.067713237  | -0.100418098 | 0.062512184  |
| YDR159W   | 0.260439666  | -0.17918782  | 0.321871923  |
| YDR160W   | 0.046199677  | 0.688742269  | 0.067820614  |
| YDR161W   | -0.146366631 | 0.737022363  | -0.156638098 |
| YDR162C   | -1.331080842 | -1.514022758 | -1.07189772  |
| YDR163W   | -0.656785139 | -0.004957114 | -0.646570845 |
| YDR164C   | 0.043921286  | -0.065153092 | 0.052243115  |
| YDR165W   | -0.082602193 | -0.761813308 | -0.081925865 |
| YDR166C   | 0.438893361  | 0.111501461  | 0.590308803  |
| YDR167W   | 0.928941257  | 0.186045212  | 0.81671208   |
| YDR168W   | 0.304889869  | -1.021602645 | 0.385363184  |
| YDR169C   | 0.182546883  | -0.058082431 | 0.242762992  |
| YDR169C-A |              |              |              |
| YDR170C   | -2.795020598 | 0.253227347  | -3.158492669 |
| YDR171W   | 0.002270258  | -0.299308535 | 0.002992962  |
| YDR172W   | 0.160047306  | 0.468941337  | 0.152433696  |
| YDR173C   | 0.075749405  | 0.173462314  | 0.087333247  |
| YDR174W   | -0.949457618 | -0.227066952 | -1.150705754 |
| YDR175C   | 0.374476212  | 0.120651093  | 0.370392949  |
| YDR176W   | -3.507858589 | -0.270030484 | -1.793693421 |
| YDR177W   | -0.02593488  | -0.517663527 | -0.041551188 |
| YDR178W   | 0.254231254  | -0.220800411 | 0.348881638  |
| YDR179C   | 0.018466497  | 0.020325851  | 0.020976553  |
| YDR179W-A | 0.041063658  | -0.003142544 | 0.037094925  |
| YDR180W   | -0.372693823 | -0.551063272 | -0.516994115 |
| YDR181C   | -0.006789204 | -0.231645161 | -0.006462944 |
| YDR182W   | -0.06952062  | -0.937840767 | -0.064036852 |
| YDR182W-A |              |              |              |
| YDR183C-A |              |              |              |
| YDR183W   | 0.004304358  | -0.01229559  | 0.004559343  |
| YDR184C   | 6.39467955   | 4.230411757  | 2.83879782   |
| YDR185C   | -0.290158033 | -0.098697335 | -0.286559086 |
| YDR186C   | -0.002728737 | 0.027502887  | -0.003380891 |

|           |              |              |              |
|-----------|--------------|--------------|--------------|
| YDR187C   | -0.628114671 | -0.233533995 | -0.314418501 |
| YDR188W   | -0.722833177 | -0.239922224 | -0.353454792 |
| YDR189W   | 1.343745387  | 1.589770058  | 1.506161606  |
| YDR190C   | -0.201098196 | -0.556567831 | -0.209816883 |
| YDR191W   | 0.011711173  | -0.048265298 | 0.013131432  |
| YDR192C   | -0.062603516 | -0.070207144 | -0.067189193 |
| YDR193W   | 0.065968714  | -0.825301417 | 0.055641889  |
| YDR194C   | 0.070598529  | -0.531409458 | 0.063499094  |
| YDR194W-A |              |              |              |
| YDR195W   | -0.617443717 | -1.628032618 | -0.428368256 |
| YDR196C   | -0.009126044 | -1.328872929 | -0.010500567 |
| YDR197W   | 0.074798967  | -0.234861739 | 0.084583435  |
| YDR198C   | 0.196401848  | 0.315096254  | 0.203708415  |
| YDR199W   | 0.065180134  | 0.104884442  | 0.068121858  |
| YDR200C   | 0.128413217  | 0.009268573  | 0.137506701  |
| YDR201W   | 0.149458066  | -1.140720387 | 0.186006599  |
| YDR202C   | -0.889737547 | -0.26508957  | -0.900969202 |
| YDR203W   | -0.0026239   | -0.086546666 | -0.002725516 |
| YDR204W   | 2.98183924   | 0.149985896  | 2.547252     |
| YDR205W   | 1.09807865   | 0.540195763  | 1.041144137  |
| YDR206W   | 1.539969632  | 0.125201003  | 1.388312269  |
| YDR207C   | 1.783642845  | 1.844769371  | 1.802584265  |
| YDR208W   | 1.543703698  | 0.109163117  | 1.666770717  |
| YDR209C   | 0.008222721  | -2.236734289 | 0.007957812  |
| YDR210W   | -0.802705846 | -0.21715959  | -0.723611411 |
| YDR211W   | -2.1763435   | -1.06241374  | -1.93776037  |
| YDR212W   | -1.458270561 | -0.065944045 | -0.718624719 |
| YDR213W   | -0.770154546 | -0.065594259 | -1.113556005 |
| YDR214W   | -0.023955873 | 1.055313535  | -0.033399533 |
| YDR215C   | 0.034613367  | 0.063485273  | 0.043227682  |
| YDR216W   | 0.186648385  | -0.070783465 | 0.22147228   |
| YDR217C   | -0.053987776 | -0.902488497 | -0.040706253 |
| YDR218C   | -0.648947784 | 0.302774546  | -0.652442326 |
| YDR219C   | -1.85867783  | -1.274806216 | -1.584204796 |
| YDR220C   | 0.146888567  | 0.120080712  | 0.111465146  |
| YDR221W   | -0.020324468 | -0.271986509 | -0.016627796 |
| YDR222W   | 0.933039265  | 0.070158126  | 1.18497866   |
| YDR223W   | 0.279979215  | -0.032313975 | 0.203284576  |
| YDR224C   | 0.000990635  | 0.911311162  | 0.001045204  |
| YDR225W   | 0.034080643  | 0.661938542  | 0.039464138  |
| YDR226W   | 0.965964395  | 2.030916697  | 1.0258785    |
| YDR227W   | -0.048670744 | -0.522748604 | -0.050841992 |
| YDR228C   | -4.349388896 | -1.803046991 | -1.910807707 |
| YDR229W   | 1.590525626  | -0.034407673 | 1.515746969  |
| YDR230W   | 0.564677742  | 0.653210158  | 0.583749694  |
| YDR231C   | 0.0044984    | 0.061949756  | 0.004823793  |
| YDR232W   | -3.221704252 | -1.664843638 | -2.6246233   |
| YDR233C   | 0.118680154  | -0.038849288 | 0.092862452  |
| YDR234W   | 0.813925629  | 0.245773949  | 0.854635062  |
| YDR235W   | 0.015514734  | 1.633021286  | 0.01763026   |
| YDR236C   | 0.008305188  | -0.005339402 | 0.00881537   |
| YDR237W   | 0.269661886  | -0.54254281  | 0.225542682  |
| YDR238C   | 1.331712067  | -2.641755637 | 1.163366686  |

|           |              |              |              |
|-----------|--------------|--------------|--------------|
| YDR239C   | -1.363037839 | 0.132132515  | -1.188382044 |
| YDR240C   | 0.000719554  | 0.742344032  | 0.000726738  |
| YDR241W   | -0.017083654 | -0.643925115 | -0.020498988 |
| YDR242W   | 0.001358311  | 0.205745448  | 0.001781847  |
| YDR243C   | 0.064753295  | 0.004775707  | 0.085215728  |
| YDR244W   | -0.625308889 | -1.0504478   | -0.786994579 |
| YDR245W   | 1.886835396  | 0.081901828  | 1.606367415  |
| YDR246W   | 0.217823577  | 0.433693752  | 0.160774865  |
| YDR246W-A |              |              |              |
| YDR247W   | -0.009437184 | 0.076922402  | -0.011274277 |
| YDR248C   | -0.020162813 | -0.414531753 | -0.017993234 |
| YDR249C   | 0.012193809  | -0.691998821 | 0.013060813  |
| YDR250C   | 0.026207267  | 0.440325328  | 0.033186539  |
| YDR251W   | 0.416542499  | 0.026048058  | 0.398728712  |
| YDR252W   | -0.198859658 | 0.013847841  | -0.206741013 |
| YDR253C   | 0.221888073  | 1.088186384  | 0.242052542  |
| YDR254W   | -2.218314651 | -0.027935333 | -1.371176574 |
| YDR255C   | -0.313923389 | -1.403927042 | -0.285128393 |
| YDR256C   | 0.03022418   | -0.020467503 | 0.028353325  |
| YDR257C   | 5.756803875  | 2.22023696   | 2.604132531  |
| YDR258C   | 0.056968323  | 0.245261473  | 0.062360791  |
| YDR259C   | -0.837128062 | -0.001426587 | -1.229526249 |
| YDR260C   | 0.013106435  | -2.098493146 | 0.01154154   |
| YDR261C   | -0.237370068 | 0.1273663    | -0.214412999 |
| YDR262W   | -1.134578958 | 0.046364927  | -0.758117817 |
| YDR263C   | 0.15062298   | -0.265167254 | 0.13989592   |
| YDR264C   | -6.023245682 | -3.059132534 | -0.824592783 |
| YDR265W   | 0.042286027  | -0.031564914 | 0.036061651  |
| YDR266C   | 1.923652078  | 0.422345038  | 1.806226515  |
| YDR267C   | 0.627454021  | 0.025865382  | 0.643139566  |
| YDR268W   | 0.244615784  | -1.712703575 | 0.238144448  |
| YDR269C   | -6.171439049 | -2.327056941 | -2.97147737  |
| YDR270W   | -0.024627207 | -0.092510947 | -0.017169755 |
| YDR271C   | -5.526601969 | -2.459701867 | -2.588699958 |
| YDR272W   | -0.210212838 | 0.350407037  | -0.221348806 |
| YDR273W   | 0.04173876   | -0.095941831 | 0.049318572  |
| YDR274C   | 0.000626934  | 0.139476626  | 0.000651573  |
| YDR275W   | 0.084211935  | -2.01811715  | 0.072339306  |
| YDR276C   | -0.086258839 | 0.054006272  | -0.063548325 |
| YDR277C   | 0.004293803  | -0.402785573 | 0.004484565  |
| YDR278C   | -0.115938722 | 0.057911968  | -0.104919981 |
| YDR279W   | 0.050218492  | 0.091956901  | 0.049196773  |
| YDR280W   | 9.646396881  | 8.861840045  | 2.692571151  |
| YDR281C   | -0.483408582 | -0.002530921 | -0.494354223 |
| YDR282C   | -0.102099768 | 0.754931071  | -0.085613293 |
| YDR283C   | -0.008770452 | -1.319824835 | -0.009356784 |
| YDR284C   | 0.0690106    | -0.161387437 | 0.069919202  |
| YDR285W   | -0.089926045 | -0.174781811 | -0.137209568 |
| YDR286C   | 2.300249402  | 0.174245254  | 2.170154488  |
| YDR287W   | 0.138464485  | 0.302134877  | 0.118026256  |
| YDR288W   | 0.14827976   | 0.439507789  | 0.080731952  |
| YDR289C   | 1.550723937  | 0.027099022  | 1.005792257  |
| YDR290W   | -7.67510996  | -4.027864506 | -2.905607624 |

|           |              |              |              |
|-----------|--------------|--------------|--------------|
| YDR291W   | 0.079036549  | 0.023278747  | 0.074005458  |
| YDR292C   | 0.572171723  | -1.67802185  | 0.539104995  |
| YDR293C   | -1.094053394 | 0.359103295  | -0.573934049 |
| YDR294C   | -0.069430647 | 0.007214631  | -0.072696058 |
| YDR295C   | -2.853058158 | -0.473222039 | -2.44523177  |
| YDR296W   | 1.144208467  | 0.245310951  | 1.073141873  |
| YDR297W   | 0.240770726  | -1.164549229 | 0.253017751  |
| YDR298C   | -0.257053736 | 1.314081377  | -0.283338186 |
| YDR299W   | 0.662261072  | -0.005444292 | 0.810762102  |
| YDR300C   | -0.027203226 | -0.104916382 | -0.004711041 |
| YDR301W   | -0.016737117 | 0.505120359  | -0.011971958 |
| YDR302W   | 4.015747171  | 0.647804364  | 2.555143191  |
| YDR303C   | 1.558527622  | 1.601139194  | 0.918140026  |
| YDR304C   | -1.164724206 | -0.111332134 | -1.403959144 |
| YDR305C   | 0.046553391  | 0.242216769  | 0.039691825  |
| YDR306C   | -0.002757145 | -0.006720725 | -0.003391162 |
| YDR307W   | 0.284158658  | 0.04734203   | 0.355871521  |
| YDR308C   | 2.147938723  | 0.403536445  | 1.463621658  |
| YDR309C   | 0.234327249  | -0.012021044 | 0.284832808  |
| YDR310C   | -2.155633913 | -0.467293217 | -2.341677957 |
| YDR311W   | 4.798350638  | 2.454507645  | 3.062430259  |
| YDR312W   | 1.497684104  | 2.201257568  | 0.866975496  |
| YDR313C   | 0.316079939  | -0.929159151 | 0.329098936  |
| YDR314C   | -0.048315208 | 0.061694477  | -0.033562976 |
| YDR315C   |              |              |              |
| YDR316W   | 0.198599012  | -0.383986477 | 0.179103927  |
| YDR317W   | -0.018444319 | 0.019556194  | -0.017613439 |
| YDR318W   | -0.201095847 | 0.139527745  | -0.20250952  |
| YDR319C   | 0.009158205  | 0.468524154  | 0.009093666  |
| YDR320C   | 0.006944176  | 0.578410121  | 0.006565625  |
| YDR320C-A |              |              |              |
| YDR320W-B |              |              |              |
| YDR321W   | -0.192692494 | -0.1532997   | -0.210567943 |
| YDR322C-A |              |              |              |
| YDR322W   | -5.855029374 | -7.65943453  | -3.805805875 |
| YDR323C   | -1.196665044 | -0.173180344 | -1.200831772 |
| YDR324C   | 1.422643526  | 0.90672758   | 0.804584763  |
| YDR325W   | -0.083118524 | -0.169211458 | -0.082990126 |
| YDR326C   | -0.051260351 | -0.017954937 | -0.05269173  |
| YDR327W   | -0.737156656 | -0.06909654  | -0.763814038 |
| YDR328C   | -1.704107966 | 0.211553313  | -1.422484464 |
| YDR329C   | 3.571577769  | 1.439910564  | 2.336593973  |
| YDR330W   | 0.04431123   | 0.092679123  | 0.054501302  |
| YDR331W   | 2.900636545  | 3.640614257  | 1.934659375  |
| YDR332W   | -0.023892048 | -0.304713955 | -0.024225026 |
| YDR333C   | -1.714202081 | 0.897881515  | -1.631733118 |
| YDR334W   | -2.865149102 | -1.060963333 | -2.250537696 |
| YDR335W   | -6.28707543  | -2.441087049 | -1.934071114 |
| YDR336W   | 0.205369956  | -0.026037143 | 0.206410985  |
| YDR337W   | 0.790857678  | -0.035127101 | 0.649922642  |
| YDR338C   | -1.382276775 | 0.029870683  | -1.995178194 |
| YDR339C   | -0.005297382 | -0.219309192 | -0.007301842 |
| YDR340W   | 0.071981393  | 0.270388022  | 0.052473594  |

|           |              |              |              |
|-----------|--------------|--------------|--------------|
| YDR341C   | 1.940231836  | 2.638538468  | 1.679516889  |
| YDR342C   |              |              |              |
| YDR343C   |              |              |              |
| YDR344C   | -0.027376473 | -1.176124163 | -0.019119796 |
| YDR345C   | -0.501343465 | -2.97157718  | -0.373034821 |
| YDR346C   | -3.986175709 | 0.214761821  | -3.836352193 |
| YDR347W   | -0.543151522 | -1.435021752 | -0.671685056 |
| YDR348C   | 8.7392265    | 3.134914993  | 3.720973337  |
| YDR349C   | 0.008435865  | 0.059498252  | 0.007779445  |
| YDR350C   | -0.033144913 | -0.135788202 | -0.041016312 |
| YDR351W   | 0.012250297  | 0.525155145  | 0.013915117  |
| YDR352W   | -0.014585214 | -0.096497074 | -0.017912675 |
| YDR353W   | 0.631562983  | -0.086238533 | 0.766428736  |
| YDR354C-A |              |              |              |
| YDR354W   | 0.388044096  | -0.164765781 | 0.436784946  |
| YDR355C   | -2.489466171 | -0.051294068 | -2.245764421 |
| YDR356W   | -0.341311302 | 0.000164809  | -0.395736774 |
| YDR357C   | -0.035039716 | -0.025568453 | -0.03159536  |
| YDR358W   | -0.102482703 | -0.029678059 | -0.073321319 |
| YDR359C   | 1.528733714  | -0.017604723 | 1.257378051  |
| YDR360W   | -0.163236884 | -1.912126778 | -0.109994212 |
| YDR361C   | -0.478911878 | -0.057894756 | -0.593824051 |
| YDR362C   | 0.104164371  | 0.057485861  | 0.108956681  |
| YDR363W   | 0.469078486  | -0.008705278 | 0.550034641  |
| YDR363W-A | 0.314977772  | 0.123171766  | 0.384311251  |
| YDR364C   | -0.203552557 | -0.002878285 | -0.25623193  |
| YDR365C   | 0.012198357  | 0.061792018  | 0.015284053  |
| YDR366C   |              |              |              |
| YDR367W   | -0.186925792 | 0.848760718  | -0.178237683 |
| YDR368W   | 0.993995186  | -0.144277907 | 1.031250888  |
| YDR369C   | 1.182789865  | -0.1600531   | 1.448013742  |
| YDR370C   | 0.035226742  | 0.79799684   | 0.037228119  |
| YDR371C-A |              |              |              |
| YDR371W   | 0.050596448  | 1.67734504   | 0.045686176  |
| YDR372C   | 0.150860404  | 0.084000498  | 0.169232751  |
| YDR373W   | 0.008104843  | -0.25162789  | 0.007400225  |
| YDR374C   | -1.365332529 | -0.047518466 | -1.445321071 |
| YDR374W-A |              |              |              |
| YDR375C   | 0.018297274  | 0.512474205  | 0.01785582   |
| YDR376W   | -0.042379672 | 0.034334952  | -0.051962257 |
| YDR377W   | -0.008241173 | 0.736449557  | -0.008206923 |
| YDR378C   | 0.954668729  | -1.031275735 | 1.01268373   |
| YDR379C-A |              |              |              |
| YDR379W   | -0.028086209 | -0.080221302 | -0.030228893 |
| YDR380W   | 0.028777639  | 0.097142043  | 0.034058562  |
| YDR381C-A |              |              |              |
| YDR381W   | -0.902690025 | -0.757533667 | -0.945410884 |
| YDR382W   | 0.017124085  | 0.033993111  | 0.01054464   |
| YDR383C   | -0.402248237 | -0.405736726 | -0.388938449 |
| YDR384C   | -0.814216969 | -0.052341131 | -0.854018815 |
| YDR385W   | 0.228951942  | 0.005600894  | 0.193070376  |
| YDR386W   | 0.414984446  | 0.2088145    | 0.529234247  |
| YDR387C   | -0.078935431 | 0.03397606   | -0.091224241 |

|           |              |              |              |
|-----------|--------------|--------------|--------------|
| YDR388W   | -0.026667669 | 0.055983929  | -0.025643136 |
| YDR389W   | -0.034289277 | 0.142039481  | -0.035584307 |
| YDR390C   | 0.017482556  | 0.002308345  | 0.025011155  |
| YDR391C   | -0.405525876 | -0.402524208 | -0.421714536 |
| YDR392W   | -0.032348894 | 1.346856352  | -0.036043229 |
| YDR393W   | -0.458918449 | -0.053620709 | -0.657645966 |
| YDR394W   | 6.391299041  | 2.942251799  | 3.970903094  |
| YDR395W   | 0.001411856  | 0.12727738   | 0.001507089  |
| YDR396W   | 1.121663488  | 0.010226415  | 0.877485708  |
| YDR397C   | -0.038056976 | -1.287986843 | -0.037643782 |
| YDR398W   | 2.686317496  | 0.209832684  | 1.330094939  |
| YDR399W   | 0.047136482  | -0.188765932 | 0.057494846  |
| YDR400W   | 0.036749606  | -0.698078106 | 0.03216257   |
| YDR401W   | -1.209388419 | 0.048996852  | -1.129376723 |
| YDR402C   | 0.241932224  | 0.011112585  | 0.160784518  |
| YDR403W   | 0.151892837  | -0.179082211 | 0.160874557  |
| YDR404C   | 0.233915741  | 8.961539648  | 0.053877292  |
| YDR405W   | 2.236591103  | 0.169379221  | 1.680186152  |
| YDR406W   | -0.265430936 | -1.156158436 | -0.235168984 |
| YDR406W-A |              |              |              |
| YDR407C   | 0.593580214  | 0.715733614  | 0.618775148  |
| YDR408C   | 0.085495323  | 0.906625382  | 0.060170075  |
| YDR409W   | 0.952170786  | -0.109415619 | 0.658990237  |
| YDR410C   | 0.030497711  | -0.177968054 | 0.022946008  |
| YDR411C   | -0.043858197 | 0.239323116  | -0.057378936 |
| YDR412W   | -0.037460639 | -0.251221552 | -0.048132477 |
| YDR413C   | -1.692862334 | -2.057975452 | -1.807515851 |
| YDR414C   | 2.470511052  | 0.642725496  | 2.071431122  |
| YDR415C   | 0.034966299  | 0.047746328  | 0.028714292  |
| YDR416W   | -0.126809192 | -0.208432041 | -0.123831541 |
| YDR417C   | 6.037755748  | 0.411438748  | 1.956598111  |
| YDR418W   | 1.891624883  |              | 0.485244867  |
| YDR419W   | -0.001690559 | -0.620642097 | -0.001380489 |
| YDR420W   | 0.020475475  | -0.10566268  | 0.019981822  |
| YDR421W   | -0.252585121 | 1.337884549  | -0.222997213 |
| YDR422C   | 1.39471775   | -0.055071757 | 0.991343461  |
| YDR423C   | -0.006809938 | -0.268503127 | -0.007173781 |
| YDR424C   | 0.138304918  | -0.197147406 | 0.172240971  |
| YDR425W   | 0.118834818  | 0.206241765  | 0.096825915  |
| YDR426C   | 0.104378123  | 0.253104646  | 0.077533547  |
| YDR427W   | 4.887402589  | 3.439061452  | 4.08946381   |
| YDR428C   | 0.316499028  | -0.275019026 | 0.332328652  |
| YDR429C   | -24.16514478 | -26.09696202 | -7.703052401 |
| YDR430C   | -0.213375879 | -0.30673271  | -0.174722433 |
| YDR431W   | 0.816708545  | -0.025675661 | 0.737003262  |
| YDR432W   | -0.075023342 | -0.004471493 | -0.085640544 |
| YDR433W   |              |              |              |
| YDR434W   | -0.18057918  | -1.070868828 | -0.211554232 |
| YDR435C   | 0.459544308  | 0.444739239  | 0.429442511  |
| YDR436W   | 0.116416415  | -1.370603498 | 0.133291953  |
| YDR437W   | 5.270777172  | 1.147297036  | 2.937730779  |
| YDR438W   | 0.006234298  | -0.011489737 | 0.006614433  |
| YDR439W   | -0.19465562  | 0.014074013  | -0.180230525 |

|           |              |              |              |
|-----------|--------------|--------------|--------------|
| YDR440W   | 0.060299349  | -0.115252094 | 0.081406317  |
| YDR441C   | 0.026729623  | -1.588916579 | 0.019832042  |
| YDR442W   | 1.134549078  | -0.396997677 | 0.97858208   |
| YDR443C   | 1.073820026  | -0.084301707 | 0.698403926  |
| YDR444W   | -0.068155429 | 0.241508844  | -0.084443997 |
| YDR445C   | -0.56341748  | -0.20261315  | -0.603133706 |
| YDR446W   | 6.530317292  | 1.398786312  | 4.310434707  |
| YDR447C   | 3.843858504  | 0.301522732  | 1.922512459  |
| YDR448W   |              |              |              |
| YDR449C   | 4.844694376  | 0.377915624  | 2.199385797  |
| YDR450W   | 6.325479516  | 3.741269885  | 2.509450451  |
| YDR451C   | -0.081961825 | 0.285139595  | -0.104582319 |
| YDR452W   | -0.004010395 | -0.058405157 | -0.005937024 |
| YDR453C   | -0.005634177 | 0.363618051  | -0.006484512 |
| YDR454C   | -0.031604389 | -0.100256597 | -0.046259549 |
| YDR455C   | 1.492988428  | 0.013822728  | 1.187592735  |
| YDR456W   | 0.074297393  | -0.010529397 | 0.064657469  |
| YDR457W   | -0.664843717 | 0.032101072  | -0.562706069 |
| YDR458C   | 16.1504307   | 3.920730057  | 7.540723417  |
| YDR459C   | -0.013787848 | -0.008882971 | -0.014287971 |
| YDR460W   | 0.523045563  | -0.097911858 | 0.4804776    |
| YDR461C-A |              |              |              |
| YDR461W   | -3.58440855  | -1.031095676 | -1.918301634 |
| YDR462W   | -2.519299918 | -1.909463025 | -1.832739005 |
| YDR463W   | 1.690279433  | 0.855843258  | 1.30885142   |
| YDR464C-A |              |              |              |
| YDR464W   | 1.24461608   | 0.119723924  | 1.016119468  |
| YDR465C   | -0.419154286 | -0.080056002 | -0.413014835 |
| YDR466W   | -0.102971824 | 0.251773319  | -0.126086292 |
| YDR467C   | -2.907775351 | -0.86966728  | -1.697670765 |
| YDR468C   | 0.224267118  | 0.812898027  | 0.124047236  |
| YDR469W   | -0.1061169   | 1.293238133  | -0.085201637 |
| YDR470C   | 0.090372487  | -2.398494273 | 0.043617312  |
| YDR471W   | 0.153611078  | 0.148412544  | 0.085128935  |
| YDR472W   | 2.033588395  | -0.079581982 | 1.512971052  |
| YDR473C   | -3.896622315 | -0.370755014 | -3.17026017  |
| YDR474C   | -0.112440458 | -0.444354393 | -0.085338556 |
| YDR475C   | -1.176031641 | -0.264839772 | -1.137005238 |
| YDR476C   | -0.174474704 | 0.136090635  | -0.22959497  |
| YDR477W   | 0.596465321  | -0.019905423 | 0.860784377  |
| YDR478W   | -0.028710479 | 0.002517582  | -0.036072381 |
| YDR479C   | -0.048885858 | -0.022499097 | -0.067512018 |
| YDR480W   | -0.396926447 | 0.024533204  | -0.2750654   |
| YDR481C   | -0.027476664 | -0.609899436 | -0.028481414 |
| YDR482C   | -0.474834558 | -1.414937546 | -0.466891639 |
| YDR483W   | 0.634891274  | 0.045605251  | 0.474353297  |
| YDR484W   | -0.276303991 | 0.303374261  | -0.258593368 |
| YDR485C   |              | -0.138192166 |              |
| YDR486C   | -1.480721688 | -1.128468963 | -1.33405138  |
| YDR487C   | 0.169677596  | -0.057402973 | 0.146673349  |
| YDR488C   | -0.98091206  | 0.120824166  | -0.737449972 |
| YDR489W   | 0.255985623  | 0.68172313   | 0.279781598  |
| YDR490C   | 0.027971112  | 0.129502278  | 0.035520038  |

|           |              |              |              |
|-----------|--------------|--------------|--------------|
| YDR491C   | -0.002387062 | -0.271937424 | -0.002759883 |
| YDR492W   | -0.01032437  | -2.231453047 | -0.008571918 |
| YDR493W   | -0.193669652 | 0.09713554   | -0.286302671 |
| YDR494W   | 0.101701035  | 0.034058434  | 0.118451717  |
| YDR495C   | -1.034055672 | -0.808724264 | -1.316511669 |
| YDR496C   | 1.137503999  | 0.594774308  | 0.989673699  |
| YDR497C   | 0.311751343  | 2.136954781  | 0.276400838  |
| YDR498C   | 0.048458064  | -0.023281652 | 0.050348195  |
| YDR499W   | -0.391905882 | -1.462926809 | -0.434566234 |
| YDR500C   | -1.358221031 | 0.000436627  | -1.603932355 |
| YDR501W   |              | -2.565246139 |              |
| YDR502C   | -1.267341053 | -1.712324579 | -1.367825814 |
| YDR503C   | -0.080607937 | 0.255780174  | -0.09424923  |
| YDR504C   | 0.017036554  | -0.060074168 | 0.025805798  |
| YDR505C   | 2.700663452  | 1.090655358  | 2.61203827   |
| YDR506C   | -1.357953957 | -0.028964212 | -1.226119402 |
| YDR507C   | 8.617679409  |              | 1.963211276  |
| YDR508C   | -0.097612566 | -1.678420749 | -0.121777778 |
| YDR509W   | -1.546375349 | -0.917854481 | -1.633657731 |
| YDR510C-A |              |              |              |
| YDR510W   | 1.106894206  | -0.151571668 | 1.093904878  |
| YDR511W   | -0.159942602 | 0.173567832  | -0.143145576 |
| YDR512C   | 0.070304928  | -0.093536662 | 0.105459582  |
| YDR513W   | 0.018363107  | -0.649013449 | 0.01506225   |
| YDR514C   | -0.065360616 | -0.331072652 | -0.081678919 |
| YDR515W   | 0.04498103   | -0.046029015 | 0.048149075  |
| YDR516C   | 12.20223726  | 0.060223384  | 2.721080144  |
| YDR517W   | -0.043426458 | -0.01205005  | -0.058073021 |
| YDR518W   |              |              |              |
| YDR519W   | -0.030358533 | -0.004016511 | -0.044652466 |
| YDR520C   | -0.224421196 | 0.132925737  | -0.259835518 |
| YDR521W   | -0.035642994 | -0.623282797 | -0.035910659 |
| YDR522C   | -0.008174575 | 0.472955702  | -0.007371455 |
| YDR523C   | 3.793726438  | 0.640804351  | 2.897766748  |
| YDR524C   | -1.860742998 | -2.261900893 | -1.623213393 |
| YDR524C-A |              |              |              |
| YDR524C-B |              |              |              |
| YDR524W-C |              |              |              |
| YDR525W   | 0.217271127  | -0.402320939 | 0.199506342  |
| YDR525W-A | 0.13625203   | 0.005322561  | 0.18724777   |
| YDR526C   | 0.068996194  | 0.125692941  | 0.087364283  |
| YDR527W   | -0.069443436 | -0.060281503 | -0.062277103 |
| YDR528W   | -0.464479517 | -1.453890235 | -0.368209122 |
| YDR529C   | -1.296069953 | -0.477846702 | -1.459270822 |
| YDR530C   | 0.007175654  | -0.916960465 | 0.008250165  |
| YDR531W   | -0.245590008 | 0.026009676  | -0.214044166 |
| YDR532C   | 0.384491572  | -0.006022695 | 0.303829032  |
| YDR533C   | 0.352757238  | 0.083893552  | 0.338459735  |
| YDR534C   | -1.031965272 | -0.730235583 | -0.855471673 |
| YDR535C   | -0.305822584 | 0.389059352  | -0.319394938 |
| YDR536W   | 1.395945526  | -1.315432903 | 1.53018937   |
| YDR537C   | 0.154774401  | -0.261178158 | 0.191383708  |
| YDR538W   | 0.019709777  | -0.993217368 | 0.02710691   |



|           |              |              |              |
|-----------|--------------|--------------|--------------|
| YDR539W   | -0.238621289 | 0.042703389  | -0.313341229 |
| YDR540C   | 0.138579087  | 0.001514148  | 0.129725673  |
| YDR541C   | 0.078444684  | -0.069494207 | 0.10019707   |
| YDR542W   |              |              |              |
| YDR543C   |              |              |              |
| YDR544C   |              |              |              |
| YDR545C-A |              |              |              |
| YDR545W   |              |              |              |
| YEL001C   | -0.240580881 | 0.452505495  | -0.187454376 |
| YEL002C   | 2.934515757  | 0.214582936  | 2.57070579   |
| YEL003W   | -1.382010758 | -0.10322906  | -1.028312031 |
| YEL004W   | -0.057093591 | 1.010535844  | -0.045234194 |
| YEL005C   | 0.113220552  | 0.248366542  | 0.097181106  |
| YEL006W   | 1.747445605  | -0.115339519 | 1.723724728  |
| YEL007W   | 0.623611547  | -0.434785695 | 0.544699979  |
| YEL008C-A |              |              |              |
| YEL008W   | 1.278356951  | 1.323549779  | 1.587793493  |
| YEL009C   | 0.655262173  | 0.41716466   | 0.773813132  |
| YEL009C-A |              |              |              |
| YEL010W   | 0.941167463  | 0.159331955  | 0.928740882  |
| YEL011W   | -0.120455796 | -0.020191722 | -0.137007646 |
| YEL012W   | 0.075950578  | -0.080159312 | 0.07579626   |
| YEL013W   | -0.048278426 | -0.436778963 | -0.030396488 |
| YEL014C   | 5.934927347  | 0.45068124   | 3.879685548  |
| YEL015W   | 9.374984331  | 0.660136175  | 5.984886983  |
| YEL016C   | -0.102952709 | 0.291060208  | -0.110552434 |
| YEL017C-A | 2.406579108  | 2.92469857   | 1.818571623  |
| YEL017W   | 3.023643641  | 5.143313677  | 1.39953043   |
| YEL018C-A |              |              |              |
| YEL018W   | 2.117011981  | 0.172036262  | 2.024200727  |
| YEL019C   | 0.003681991  | 1.222947146  | 0.00440547   |
| YEL020C   | -0.172735127 | 1.267774274  | -0.158870139 |
| YEL020C-B |              |              |              |
| YEL020W-A |              |              |              |
| YEL021W   |              |              |              |
| YEL022W   |              |              |              |
| YEL023C   | -1.656794531 | -0.078044478 | -2.150924485 |
| YEL024W   | 5.212120578  | 0.887100634  | 3.792054449  |
| YEL025C   | 0.059825927  | -1.075935654 | 0.06505299   |
| YEL026W   | 0.459717926  | 1.912502237  | 0.385702238  |
| YEL027W   | -1.959292793 | -2.428452119 | -1.052072126 |
| YEL028W   | -0.018265561 | 0.52651553   | -0.013204663 |
| YEL029C   | 0.545536494  | 0.069320775  | 0.71580041   |
| YEL030C-A |              |              |              |
| YEL030W   | 0.108458665  | 0.238268514  | 0.106935658  |
| YEL031W   | 0.40913097   | 0.025486684  | 0.479076618  |
| YEL032C-A |              |              |              |
| YEL032W   | 0.096669353  | 0.951392988  | 0.076726844  |
| YEL033W   | 1.467937123  | 4.734252253  | 0.726269783  |
| YEL034C-A |              |              |              |
| YEL034W   | 1.313696579  | 3.060303657  | 0.670954454  |
| YEL035C   | 0.651683661  | 5.773066043  | 0.341054326  |
| YEL036C   | 0.093414425  | 2.181909513  | 0.077591874  |

|           |              |              |              |
|-----------|--------------|--------------|--------------|
| YEL037C   | 0.155287737  | 1.064199098  | 0.169585969  |
| YEL038W   | -0.959464705 | 0.181812579  | -1.109867371 |
| YEL039C   | 0.018122448  | 0.028254189  | 0.015444448  |
| YEL040W   | 0.267519102  | 0.048352489  | 0.252999986  |
| YEL041W   |              |              |              |
| YEL042W   | 0.133724318  | -0.669962015 | 0.149174764  |
| YEL043W   | 1.245799463  | 0.33232428   | 0.95929232   |
| YEL044W   | -0.163334693 | 0.127732913  | -0.177163199 |
| YEL045C   | -0.020635333 | 0.246219693  | -0.015827125 |
| YEL046C   | 0.112719883  | 2.048879299  | 0.098543669  |
| YEL047C   | 0.34624983   | 0.34373659   | 0.401121907  |
| YEL048C   | 0.007115115  | 0.171547657  | 0.007029296  |
| YEL049W   | -0.040373445 | 0.150315591  | -0.042306161 |
| YEL050C   | 1.099433237  | 1.527826579  | 1.004378125  |
| YEL050W-A |              |              |              |
| YEL051W   | -0.144742385 | -0.254481787 | -0.181840114 |
| YEL052W   | -0.257973986 | -0.935438336 | -0.278642264 |
| YEL053C   | -0.081887212 | -0.093439011 | -0.099634972 |
| YEL053W-A |              |              |              |
| YEL054C   | 0.772992501  | 2.066714018  | 0.386371066  |
| YEL055C   | -0.344879102 | -0.014224133 | -0.302260906 |
| YEL056W   | 0.579219582  | -0.039387504 | 0.564202634  |
| YEL057C   | 0.145452916  | 0.02488609   | 0.131075873  |
| YEL058W   | -0.979115811 | -0.05403516  | -0.986886213 |
| YEL059C-A |              |              |              |
| YEL059W   | -4.03424746  | -1.530320545 | -3.263640856 |
| YEL060C   | 1.597996215  | 0.169228841  | 1.467336204  |
| YEL061C   | -0.177325947 | 0.32469022   | -0.202188524 |
| YEL062W   | 0.752925966  | 0.422073038  | 0.813102748  |
| YEL063C   | -0.149392394 | 1.138218968  | -0.135851025 |
| YEL064C   | -0.05247424  | 0.142177801  | -0.065740598 |
| YEL065W   | 0.10857187   | 0.854247918  | 0.126824395  |
| YEL066W   | 0.0390755    | 0.278590736  | 0.054513769  |
| YEL067C   | 0.170291864  | -0.355110738 | 0.215385392  |
| YEL068C   | 0.023801784  | -0.713475237 | 0.025450113  |
| YEL069C   |              |              |              |
| YEL070W   |              |              |              |
| YEL071W   | -0.627452455 | -0.048453923 | -0.714556035 |
| YEL072W   | 0.054281551  | -0.137008302 | 0.052513032  |
| YEL073C   |              |              |              |
| YEL074W   |              |              |              |
| YEL075C   |              |              |              |
| YEL075W-A |              |              |              |
| YEL076C   |              |              |              |
| YEL076C-A |              |              |              |
| YEL077C   |              |              |              |
| YEL077W-A |              |              |              |
| YER001W   | -0.664318085 | 0.221479263  | -0.677299315 |
| YER002W   | 0.428033754  | 0.768843396  | 0.435239572  |
| YER003C   | -0.062446743 | 0.167851398  | -0.077458059 |
| YER004W   | 0.133762319  | 1.214525533  | 0.156024308  |
| YER005W   | -0.140077851 | 0.021075905  | -0.183083247 |
| YER006C-A |              |              |              |

|           |              |              |              |
|-----------|--------------|--------------|--------------|
| YER006W   | 0.410798815  | 0.440101363  | 0.464100426  |
| YER007C-A | 0.443931797  | -0.0088596   | 0.453311433  |
| YER007W   | -6.206351782 | -0.015147397 | -2.166844427 |
| YER008C   | 0.217389075  | 0.152269331  | 0.226032968  |
| YER009W   | 1.558879525  | 0.473237676  | 1.509354685  |
| YER010C   | 0.71394563   | 0.959408146  | 1.047267203  |
| YER011W   | -0.041306023 | 0.901907169  | -0.050103705 |
| YER012W   | 10.65526086  | 1.954486849  | 4.978774989  |
| YER013W   | -0.113750318 | -0.153523572 | -0.088966904 |
| YER014C-A | 0.490794544  | -0.005196245 | 0.531458363  |
| YER014W   | -0.869913633 | 0.210505412  | -0.671043524 |
| YER015W   |              |              |              |
| YER016W   |              |              |              |
| YER017C   | -2.850748014 | -1.12719665  | -3.064807243 |
| YER018C   | -1.249530107 | -0.028953011 | -1.272557172 |
| YER019C-A | -0.429997706 | -0.022984351 | -0.539954425 |
| YER019W   | -0.080546491 | -1.746286243 | -0.101980964 |
| YER020W   | -1.346547443 | -0.76597214  | -1.30113219  |
| YER021W   | 5.827006316  | 3.251043091  | 5.19368122   |
| YER022W   | -3.389328702 | 0.044182002  | -2.565429085 |
| YER023C-A |              |              |              |
| YER023W   | 0.190132046  | 0.015465994  | 0.213177416  |
| YER024W   | 0.0629994    | 0.729181758  | 0.071513407  |
| YER025W   | -32.14541111 | -30.54438748 | -14.87372741 |
| YER026C   |              |              |              |
| YER027C   | 0.512332116  | -0.590665061 | 0.722125065  |
| YER028C   | -0.040086611 | -1.055563967 | -0.039607767 |
| YER029C   |              |              |              |
| YER030W   | -0.110452042 | 0.252180054  | -0.122950982 |
| YER031C   | 2.327650674  | 3.935033289  | 1.797931731  |
| YER032W   | 0.19164254   | -0.103414921 | 0.174534849  |
| YER033C   | -0.055407334 | 0.541299401  | -0.055452251 |
| YER034W   | 0.779718459  | 1.836644627  | 0.552370223  |
| YER035W   | 0.244773415  | -0.995943314 | 0.263107564  |
| YER036C   | -0.320668999 | -0.583271415 | -0.34312869  |
| YER037W   | -3.385709811 | -1.961837991 | -3.988340423 |
| YER038C   | 0.000955849  | 0.898464543  | 0.001303534  |
| YER038W-A | 0.070691948  | -0.000812324 | 0.084909163  |
| YER039C   | -0.198576845 | -0.361403209 | -0.163022957 |
| YER039C-A | -0.043862664 | 0.707910517  | -0.053083956 |
| YER040W   | -0.157969014 | -0.119797551 | -0.159200068 |
| YER041W   | -0.012240406 | -0.037695835 | -0.015525114 |
| YER042W   | 0.022183771  | -0.058408438 | 0.024126533  |
| YER043C   | 0.191486077  | 0.015890997  | 0.16369671   |
| YER044C   | -0.268420344 | -0.949119738 | -0.357752858 |
| YER044C-A | -7.00E-05    | -1.349858003 | -6.84E-05    |
| YER045C   | -0.59301272  | -2.571162602 | -0.622039622 |
| YER046W   | -0.116840182 | -1.663985435 | -0.098644909 |
| YER046W-A | -1.396877067 | -0.269374297 | -1.447080231 |
| YER047C   | -0.29319576  | 0.016636663  | -0.32250485  |
| YER048C   | -0.247529607 | -0.433435858 | -0.294538318 |
| YER048W-A | -0.193848912 | 0.029050158  | -0.205097832 |
| YER049W   | -0.214386315 | 0.050472878  | -0.243678401 |

|           |              |              |              |
|-----------|--------------|--------------|--------------|
| YER050C   | -0.017566216 | -0.32032545  | -0.013608738 |
| YER051W   | 0.089706283  | -0.690268887 | 0.069308557  |
| YER052C   | -0.207974818 | -0.369414155 | -0.179127712 |
| YER053C   | -0.479068206 | -0.056607545 | -0.377170496 |
| YER053C-A |              |              |              |
| YER054C   | 0.081055204  | 0.372926102  | 0.074768745  |
| YER055C   | -1.830463746 | -0.723128466 | -1.555000731 |
| YER056C   | -2.046349272 | -1.843991299 | -2.355680826 |
| YER056C-A | 4.738076373  | 5.509362148  | 2.005367997  |
| YER057C   | -0.017895473 | -0.317397702 | -0.014700836 |
| YER058W   | -0.129551466 | 0.027306357  | -0.118376169 |
| YER059W   | 0.090059722  | 0.386170272  | 0.134119326  |
| YER060W   | -0.075273318 | 0.026722683  | -0.102275922 |
| YER060W-A | -0.176257046 | 0.158018293  | -0.221921632 |
| YER061C   | 0.024872112  | -0.164474569 | 0.029288108  |
| YER062C   | 0.049360189  | -2.257874507 | 0.0468822    |
| YER063W   | -0.369072159 | -0.086077621 | -0.492113126 |
| YER064C   | -1.151438567 | -1.876071353 | -1.35570047  |
| YER065C   | -0.134140877 | -0.57963939  | -0.116260976 |
| YER066C-A | -2.828275736 | 0.093047616  | -2.245569054 |
| YER066W   | -0.047253606 | 0.138296576  | -0.056805715 |
| YER067C-A | -0.006859902 | 0.133636779  | -0.008983897 |
| YER067W   | -0.011396905 | 0.153255522  | -0.010238645 |
| YER068C-A | 0.758447899  | 0.00212545   | 0.982799907  |
| YER068W   | -0.376239321 | -0.317576602 | -0.285507685 |
| YER069W   | 1.069152297  | 2.826206744  | 0.988383157  |
| YER070W   | 0.012608033  | 0.59140622   | 0.016986779  |
| YER071C   | -0.00685037  | 0.025521091  | -0.011314922 |
| YER072W   | -0.110686448 | -0.596927626 | -0.104449642 |
| YER073W   | -0.01677729  | 0.178412214  | -0.015908404 |
| YER074W   | 9.066332298  | 0.790915994  | 2.609635297  |
| YER074W-A |              |              |              |
| YER075C   | -0.028024824 | -0.093606747 | -0.03238819  |
| YER076C   |              |              |              |
| YER076W-A |              |              |              |
| YER077C   | 0.067992512  | -1.642939678 | 0.04609929   |
| YER078C   | -1.132062092 | -0.201575034 | -0.956375018 |
| YER078W-A |              |              |              |
| YER079C-A |              |              |              |
| YER079W   | -0.049892398 | -0.064339995 | -0.052778495 |
| YER080W   | -0.731262873 | -0.474198735 | -0.694470085 |
| YER081W   | -0.123905823 | -0.011926053 | -0.112187914 |
| YER082C   | 0.087101499  | -1.093144485 | 0.080950286  |
| YER083C   | -0.755439617 | -1.376683394 | -0.798121684 |
| YER084W   | 0.172369296  | 0.00291892   | 0.205156698  |
| YER084W-A |              |              |              |
| YER085C   | -0.140770275 | 0.29349156   | -0.194955676 |
| YER086W   | 0.10848012   | 0.4608821    | 0.090706065  |
| YER087C-A | -0.202411215 | -2.185391719 | -0.174823157 |
| YER087C-B |              |              |              |
| YER087W   | -0.019354486 | -0.244907449 | -0.018387329 |
| YER088C   | -0.152248838 | 0.023269767  | -0.13153277  |
| YER088C-A |              |              |              |

|           |              |              |              |
|-----------|--------------|--------------|--------------|
| YER088W-B |              |              |              |
| YER089C   | -0.30044104  | 0.003917091  | -0.291053263 |
| YER090C-A |              |              |              |
| YER090W   | 0.441958932  | -0.061856813 | 0.548377878  |
| YER091C   | -0.042499489 | -0.009059396 | -0.040135862 |
| YER091C-A | -1.161763222 | -0.007890315 | -1.285333406 |
| YER092W   | 0.020035667  | -1.599291857 | 0.014574797  |
| YER093C   | -2.198904193 | 0.275155538  | -1.615428731 |
| YER093C-A | 0.004944812  | -0.007016426 | 0.007212203  |
| YER094C   | 12.62861095  | 3.674446371  | 6.023598824  |
| YER095W   | 5.367911071  | 4.242995706  | 2.956850631  |
| YER096W   | 0.132304304  | 0.727336155  | 0.187453331  |
| YER097W   | -0.732847951 | 0.450312594  | -0.745112089 |
| YER098W   | -1.409179028 | -2.898173741 | -1.094297687 |
| YER099C   |              |              |              |
| YER100W   |              |              |              |
| YER101C   | -0.376245207 | -0.078627344 | -0.421477286 |
| YER102W   |              |              |              |
| YER103W   | 0.200888257  | 0.093723092  | 0.18269161   |
| YER104W   | -0.552161409 | -1.291276897 | -0.458080642 |
| YER105C   |              |              |              |
| YER106W   | 1.013182765  | 0.072156849  | 1.18508777   |
| YER107C   | 0.2653542    | -0.123394278 | 0.315136101  |
| YER107W-A |              |              |              |
| YER108C   | -1.478222558 | -0.807241034 | -1.084674113 |
| YER109C   | 0.410920732  | -0.046599336 | 0.134244331  |
| YER110C   | -3.072731374 | -2.290351008 | -2.308933405 |
| YER111C   | 0.053224099  | -0.018485555 | 0.057802793  |
| YER112W   | -1.028557753 | -1.847924512 | -0.720353425 |
| YER113C   | -0.001227663 | -0.55488156  | -0.001217393 |
| YER114C   | 1.510993155  | -0.037188931 | 1.522080146  |
| YER115C   | 0.025809577  | -0.259142916 | 0.028535029  |
| YER116C   | -2.989240036 | -1.192578015 | -2.254822633 |
| YER117W   | 5.073329749  | 7.473609485  | 1.737178074  |
| YER118C   | -12.40932908 | -8.08603893  | -7.495644262 |
| YER119C   | 0.209332793  | 0.537509444  | 0.212101733  |
| YER119C-A | -1.315901614 | -2.241885202 | -1.014543974 |
| YER120W   | 0.0004877    | -0.875533465 | 0.000557713  |
| YER121W   | 0.064687912  | 0.180779711  | 0.077917982  |
| YER122C   | 0.169197144  | -0.06368558  | 0.136682692  |
| YER123W   | -0.0586003   | -0.008633682 | -0.065855582 |
| YER124C   | 0.117279474  | -0.035723666 | 0.120538884  |
| YER125W   | -1.758526623 | -1.11072074  | -1.382381005 |
| YER126C   | 1.138364023  | 0.425288693  | 0.783665526  |
| YER127W   | 0.871820277  | 0.87363103   | 0.7229723    |
| YER128W   | -0.559645247 | -0.13159113  | -0.574153937 |
| YER129W   | -0.227477214 | 0.266116541  | -0.244193786 |
| YER130C   | -1.078700365 | -0.054806268 | -1.262125797 |
| YER131W   | 2.716031254  | 0.198288253  | 1.876950976  |
| YER132C   | 0.051645456  | -0.156203766 | 0.057797734  |
| YER133W   | -1.691347372 | -9.091378734 | -0.61228301  |
| YER133W-A |              |              |              |
| YER134C   | -0.083928311 | -0.377216131 | -0.088809174 |

|           |              |              |              |
|-----------|--------------|--------------|--------------|
| YER135C   | -1.921987055 | 0.056038345  | -1.505285375 |
| YER136W   | 1.839644768  | 0.013143513  | 1.915830995  |
| YER137C   | -2.749507863 | 0.001439963  | -2.421118517 |
| YER137W-A |              |              |              |
| YER138W-A |              |              |              |
| YER139C   | 0.01083024   | 0.0438491    | 0.008468414  |
| YER140W   | 1.067053326  | 0.005250017  | 1.403547203  |
| YER141W   | -0.257844815 | -0.001564163 | -0.257857507 |
| YER142C   | 0.055234322  | -0.05424421  | 0.083907538  |
| YER143W   | -0.20192982  | 0.384976022  | -0.221019322 |
| YER144C   | -0.013472018 | 0.005381241  | -0.017284756 |
| YER145C   | 0.11349142   | 0.70635332   | 0.121970949  |
| YER145C-A |              |              |              |
| YER146W   | -1.435014934 | -0.153659622 | -1.421553684 |
| YER147C   | -0.017059344 | 0.034274213  | -0.016610317 |
| YER147C-A |              |              |              |
| YER148W   | -10.17354703 | -8.551116418 | -6.536309766 |
| YER148W-A |              |              |              |
| YER149C   | -0.244036399 | -0.61281371  | -0.280392824 |
| YER150W   | -0.019662347 | -0.996069924 | -0.016509912 |
| YER151C   | -3.871717603 | -2.030712671 | -3.134579226 |
| YER152C   | -0.426043319 | 0.154183154  | -0.427831666 |
| YER152W-A |              |              |              |
| YER153C   | 1.393246051  | -1.460389904 | 1.142615452  |
| YER154W   | -0.304516433 | -0.52443935  | -0.31333787  |
| YER155C   | -1.416336471 | 0.145273759  | -1.179464167 |
| YER156C   | 0.147748336  | -0.004027097 | 0.198612302  |
| YER157W   | -0.078041292 | -3.653035613 | -0.020486828 |
| YER158C   | -0.141948407 | 1.106827555  | -0.10561187  |
| YER158W-A |              |              |              |
| YER159C   | 0.222702189  | 0.556667737  | 0.258623375  |
| YER161C   | 0.013424182  | -0.170638866 | 0.014068937  |
| YER162C   |              |              |              |
| YER163C   | -0.015794187 | 0.309310762  | -0.014606256 |
| YER164W   | -2.565572631 | -0.76735727  | -2.324574197 |
| YER165C-A |              |              |              |
| YER165W   | 16.76136516  | 9.118879895  | 4.430078463  |
| YER166W   | -22.69112945 | -12.92459315 | -6.883148046 |
| YER167W   | 0.004374031  | 0.019466034  | 0.005436589  |
| YER168C   | 0.000207363  | 0.044753579  | 0.000303929  |
| YER169W   | 0.201850998  | 1.238932604  | 0.281607833  |
| YER170W   | -0.001923978 | 0.085508963  | -0.002285954 |
| YER171W   | 1.793924729  | 0.774738197  | 2.088402355  |
| YER172C   | 3.080980951  | 0.139827629  | 3.633645595  |
| YER172C-A |              |              |              |
| YER173W   | 0.00528588   | 0.035335874  | 0.005229273  |
| YER174C   | -0.001667566 | 0.370868963  | -0.002127947 |
| YER175C   | -0.499137125 | -0.181536137 | -0.621025666 |
| YER175W-A |              |              |              |
| YER176W   | -1.243961405 | -1.276001131 | -1.015392679 |
| YER177W   | -3.508680943 | -2.035124723 | -2.297447697 |
| YER178W   | -1.081386243 | 0.004214072  | -0.855119512 |
| YER179W   | -0.037406258 | 0.839911529  | -0.053537346 |

|           |              |              |              |
|-----------|--------------|--------------|--------------|
| YER180C   | -0.006132295 | 0.221373649  | -0.009694273 |
| YER180C-A |              |              |              |
| YER181C   | 0.009548513  | 0.97434869   | 0.012747375  |
| YER182W   | -0.074352664 | 0.721978761  | -0.101047915 |
| YER183C   | 0.96461794   | 0.841478494  | 1.265221986  |
| YER184C   | -0.098449651 | -0.359426423 | -0.108259655 |
| YER185W   | -0.219474095 | 0.030606355  | -0.250894728 |
| YER186C   |              |              |              |
| YER187W   | -0.015286705 | 0.074752105  | -0.016482011 |
| YER188C-A |              |              |              |
| YER188W   | -6.974250831 | -1.931078744 | -2.362565802 |
| YER189W   |              |              |              |
| YER190C-A |              |              |              |
| YER190C-B |              |              |              |
| YER190W   |              |              |              |
| YFL001W   | -0.050970669 | -1.4961116   | -0.044663413 |
| YFL002C   | 0.230158054  | 0.468632311  | 0.249205121  |
| YFL003C   | -0.077372516 | 0.022311219  | -0.09207569  |
| YFL004W   | -0.175555672 | 0.028127312  | -0.217733843 |
| YFL005W   | 6.097850673  | 0.361607907  | 2.335975078  |
| YFL006W   | 1.341144028  | -0.033216417 | 1.290156118  |
| YFL007W   | 0.922190889  | 0.005138613  | 0.883788768  |
| YFL008W   | 12.56133342  | 0.794176814  | 3.689147552  |
| YFL009W   | -0.693120439 | -1.871501279 | -0.618197464 |
| YFL010C   | 0.242887759  | -2.149684344 | 0.26013646   |
| YFL010W-A |              |              |              |
| YFL011W   | -0.257973675 | -1.813115081 | -0.177227825 |
| YFL012W   | -0.03089228  | 0.388841204  | -0.040151968 |
| YFL012W-A |              |              |              |
| YFL013C   | -1.717908711 | -0.865753316 | -1.716416811 |
| YFL013W-A | -0.322806826 | -1.644726337 | -0.269478707 |
| YFL014W   | -0.008003574 | -0.061463094 | -0.007144526 |
| YFL015C   | -0.187038185 | 0.170163131  | -0.146008434 |
| YFL015W-A |              |              |              |
| YFL016C   | 3.213728236  | 0.582213747  | 3.231536063  |
| YFL017C   | -0.104121433 | 0.096706413  | -0.089093368 |
| YFL017W-A |              |              |              |
| YFL018C   | 0.0187324    | -0.819952365 | 0.021840142  |
| YFL018W-A | -0.021941259 | 0.168078269  | -0.021261878 |
| YFL019C   | -0.110333579 | 0.782757768  | -0.126101965 |
| YFL020C   | 0.018268017  | 0.163764787  | 0.018470953  |
| YFL021C-A |              |              |              |
| YFL021W   | -0.01011644  | 0.299234201  | -0.008104508 |
| YFL022C   | -0.159221604 | -1.330701464 | -0.153623933 |
| YFL023W   | 0.015217092  | 0.295536798  | 0.013862933  |
| YFL024C   | 0.048558716  | -0.101987301 | 0.048212486  |
| YFL025C   | 0.322498987  | -0.029560719 | 0.323630941  |
| YFL026W   | 0.56494483   | 0.042196451  | 0.742494983  |
| YFL027C   | -0.051675373 | -0.300658873 | -0.061444553 |
| YFL028C   | 0.007965992  | -0.020425635 | 0.010146844  |
| YFL029C   | -0.001265624 | 0.020718194  | -0.001274864 |
| YFL030W   | 0.002726304  | 0.991226728  | 0.003013275  |
| YFL031C-A |              |              |              |

|           |              |              |              |
|-----------|--------------|--------------|--------------|
| YFL031W   | 1.334800037  | 0.228367114  | 1.434957891  |
| YFL032W   | 0.037746458  | -0.013242429 | 0.038566502  |
| YFL033C   | 0.054869512  | -0.070748913 | 0.071024707  |
| YFL034C-A | 0.161533476  | 1.292089291  | 0.185334643  |
| YFL034C-B |              |              |              |
| YFL034W   | -0.037894365 | -0.06973801  | -0.033925318 |
| YFL035C   | 1.958472618  | 0.07325184   | 1.963086037  |
| YFL035C-A | 1.252747883  | 0.108641845  | 1.274415345  |
| YFL035C-B | -0.097671928 | 0.024885411  | -0.113262067 |
| YFL036W   | 0.013927014  | 1.003000646  | 0.016198483  |
| YFL037W   | -0.059663286 | -0.890669974 | -0.074606152 |
| YFL038C   | 1.845043199  | -0.003837188 | 1.976468141  |
| YFL039C   | -6.134056409 | -1.153536253 | -2.779115282 |
| YFL040W   | 0.030362427  | 0.042856462  | 0.042654449  |
| YFL041W   | 0.000633927  | 0.468333827  | 0.000812037  |
| YFL041W-A |              |              |              |
| YFL042C   | -0.100101616 | 0.616758219  | -0.095569335 |
| YFL043C   | -0.959092782 | 0.553861842  | -0.847893043 |
| YFL044C   | -0.07949157  | -0.013123309 | -0.075159147 |
| YFL045C   | 0.010012333  | -0.014046497 | 0.01299189   |
| YFL046W   | 0.08993186   | 0.130914951  | 0.110049242  |
| YFL047W   | -0.078984199 | -0.06581097  | -0.089483732 |
| YFL048C   | -0.021001909 | 0.048063596  | -0.020976717 |
| YFL049W   | 0.011071063  | 0.067773372  | 0.013884006  |
| YFL050C   | 0.144879025  | -0.027228319 | 0.165088398  |
| YFL051C   | 0.029592775  | -0.275598673 | 0.033683512  |
| YFL052W   | 0.024407455  | 0.008062518  | 0.033708851  |
| YFL053W   | 0.916880747  | -0.093698205 | 1.007939173  |
| YFL054C   | -0.016013554 | 0.161393291  | -0.017973852 |
| YFL055W   | 2.133783957  | -0.875956554 | 1.769808892  |
| YFL056C   | 0.400791471  | 0.031686401  | 0.471690153  |
| YFL057C   |              |              |              |
| YFL058W   |              |              |              |
| YFL059W   |              |              |              |
| YFL060C   | 1.71938214   | 0.05048613   | 1.449786428  |
| YFL061W   |              |              |              |
| YFL062W   |              |              |              |
| YFL063W   | 0.365977652  | -0.637669908 | 0.396412726  |
| YFL064C   |              |              |              |
| YFL065C   |              |              |              |
| YFL066C   |              |              |              |
| YFL067W   |              |              |              |
| YFL068W   |              |              |              |
| YFR001W   | 1.641161742  | 0.481700026  | 1.157353498  |
| YFR002W   | 7.368381815  | 5.799003075  | 3.533805312  |
| YFR003C   | 0.940247853  | 0.978063671  | 1.385295371  |
| YFR004W   | 4.59369684   | 0.976136511  | 3.380062033  |
| YFR005C   | -0.105682561 | -0.33664302  | -0.124359441 |
| YFR006W   | 0.051832872  | -0.009783312 | 0.084796395  |
| YFR007W   | -0.341932081 | -0.125869623 | -0.460114305 |
| YFR008W   | -0.030914574 | 0.130516143  | -0.036909796 |
| YFR009W   | 0.000694608  | 0.104141881  | 0.000927297  |
| YFR009W-A |              |              |              |



|           |              |              |              |
|-----------|--------------|--------------|--------------|
| YFR010W   | -0.001749673 | 1.776146456  | -0.00207355  |
| YFR010W-A |              |              |              |
| YFR011C   | -0.265365446 | 0.02953347   | -0.417845965 |
| YFR012W   | -0.003787766 | 0.444852554  | -0.004752087 |
| YFR012W-A |              |              |              |
| YFR013W   | -1.97605687  | -0.002579164 | -2.259684296 |
| YFR014C   | 0.292930701  | -0.508062222 | 0.34668676   |
| YFR015C   | -0.027550235 | 0.965515005  | -0.036913111 |
| YFR016C   | -0.013629706 | 0.058573806  | -0.012355717 |
| YFR017C   | -0.324125383 | -0.750861497 | -0.491822385 |
| YFR018C   | 0.209401399  | 0.103886147  | 0.262673015  |
| YFR019W   | 0.113664296  | 1.643599321  | 0.138236005  |
| YFR020W   | -0.115650947 | 0.269721529  | -0.122718983 |
| YFR021W   | 0.244949469  | -0.089239319 | 0.244955941  |
| YFR022W   | -0.167116525 | -0.074938633 | -0.176934268 |
| YFR023W   | 0.329015314  | -0.090416225 | 0.365949834  |
| YFR024C   | -1.191669491 | -0.591033011 | -1.074220274 |
| YFR024C-A | -0.135281331 | -0.114385082 | -0.093745386 |
| YFR025C   | -0.003945017 | 0.008415433  | -0.004144818 |
| YFR026C   | -0.000948412 | 1.983827366  | -0.00075027  |
| YFR027W   | -0.970718846 | -0.076076995 | -0.88819708  |
| YFR028C   | -0.038200977 | -0.008604699 | -0.037879389 |
| YFR029W   | -0.852866728 | -0.938004844 | -0.760091498 |
| YFR030W   | 0.114028657  | 1.465668415  | 0.137741411  |
| YFR031C   | -0.011452493 | 0.316771643  | -0.012147194 |
| YFR031C-A | -0.083651324 | 0.270731832  | -0.083284705 |
| YFR032C   | 1.261576472  | 0.188605852  | 1.345971802  |
| YFR032C-A | 0.579532649  | 0.0173547    | 0.300463744  |
| YFR032C-B |              |              |              |
| YFR033C   | 0.109367732  | 0.031130353  | 0.132136222  |
| YFR034C   | 0.20151976   | 0.010378249  | 0.188990595  |
| YFR034W-A |              |              |              |
| YFR035C   | 0.429902216  | 0.342965787  | 0.545314512  |
| YFR036W   | -0.060844863 | 0.001604698  | -0.078115647 |
| YFR036W-A |              |              |              |
| YFR037C   | 8.095883028  | 1.555544382  | 3.102067646  |
| YFR038W   |              |              |              |
| YFR039C   | -0.130380887 | 0.639098084  | -0.152719224 |
| YFR040W   | 3.467179083  | 1.658643297  | 3.797259929  |
| YFR041C   | 0.367953925  | 0.033668248  | 0.459124847  |
| YFR042W   | 0.01943582   | 1.402959763  | 0.023913232  |
| YFR043C   | -0.249483345 | -0.955268582 | -0.211102012 |
| YFR044C   | -0.319954786 | 0.063728155  | -0.299422174 |
| YFR045W   | -0.168529117 | -0.204793975 | -0.179749353 |
| YFR046C   | -0.069612131 | 0.196781048  | -0.079759011 |
| YFR047C   | -0.030515742 | -0.089435744 | -0.036131228 |
| YFR048W   | 0.327676865  | 0.865551905  | 0.404583764  |
| YFR049W   | -0.632877767 | 0.01122342   | -0.697482248 |
| YFR050C   | 4.172621327  | 0.199884199  | 3.392890761  |
| YFR051C   | 0.963738139  | -0.381304135 | 0.817130959  |
| YFR052C-A |              |              |              |
| YFR052W   | 2.446707252  | 1.220515477  | 3.402260142  |
| YFR053C   | 0.187476232  | 0.545101421  | 0.243654863  |

|           |              |              |              |
|-----------|--------------|--------------|--------------|
| YFR054C   | -0.05269918  | -0.085728002 | -0.063990573 |
| YFR055W   | -1.935238419 | 0.058656398  | -0.743478988 |
| YFR056C   | 0.037043162  | 0.492969598  | 0.053355201  |
| YFR057W   | 1.46278597   | 0.508988365  | 1.186746857  |
| YGL001C   | -1.647729701 | -0.025256276 | -1.416093994 |
| YGL002W   | 0.239858623  | 0.247142801  | 0.256415581  |
| YGL003C   | 0.11632168   | -0.145256583 | 0.144030313  |
| YGL004C   | 0.06716167   | 0.606599413  | 0.070275984  |
| YGL005C   | 0.161455328  | 2.026851358  | 0.157272028  |
| YGL006W   |              |              |              |
| YGL006W-A |              |              |              |
| YGL007C-A |              |              |              |
| YGL007W   | 0.618121984  | 0.964932454  | 0.755444522  |
| YGL008C   | 1.309446482  | 0.483099874  | 1.33127511   |
| YGL009C   | 0.039283604  | 1.714987484  | 0.048379336  |
| YGL010W   | 0.074830912  | -0.075133225 | 0.082859846  |
| YGL011C   | 7.316619673  | 1.641823943  | 4.328236262  |
| YGL012W   | -0.038040235 | 1.188717846  | -0.034148416 |
| YGL013C   | -27.9856358  | -6.047605126 | -12.92707461 |
| YGL014C-A |              |              |              |
| YGL014W   | 1.213809574  | 0.441259874  | 1.606200144  |
| YGL015C   | 0.000172279  | 0.675178374  | 0.000176063  |
| YGL016W   | -0.197591703 | 0.463484146  | -0.160142814 |
| YGL017W   | -0.657259622 | 0.158225453  | -0.715776412 |
| YGL018C   | -2.337482722 | 0.005520749  | -2.04573747  |
| YGL019W   | 0.066927448  | 0.006373466  | 0.0732388    |
| YGL020C   | -0.017429139 | 0.094011653  | -0.023797103 |
| YGL021W   | -0.643929685 | 0.783348228  | -0.818344608 |
| YGL022W   | 1.068089901  | 0.42470997   | 1.08519322   |
| YGL023C   |              | 0.189219932  |              |
| YGL024W   | -1.453628432 | -1.021084868 | -1.219963964 |
| YGL025C   | -1.751603229 | -0.069700897 | -1.342827121 |
| YGL026C   | -0.087628529 | 0.038896325  | -0.098846565 |
| YGL027C   | 0.70887654   | 0.242116598  | 0.655984904  |
| YGL028C   | 0.625707641  | 0.709080762  | 0.573766162  |
| YGL029W   | 0.539911518  | -0.096135321 | 0.594887027  |
| YGL030W   |              |              |              |
| YGL031C   | -2.175091819 | -3.108228564 | -1.039789387 |
| YGL032C   |              |              |              |
| YGL033W   | 1.679301292  | 2.305237331  | 1.54651724   |
| YGL034C   | -0.196221081 | -1.362403252 | -0.193047961 |
| YGL035C   | -1.961073088 | -1.97304556  | -1.373073553 |
| YGL036W   | 3.477143029  | 0.272841926  | 2.921577173  |
| YGL037C   | 0.175331138  | 0.034551475  | 0.242326643  |
| YGL038C   | 0.039453686  | 0.298701433  | 0.05201596   |
| YGL039W   | 0.738103215  | -0.798181956 | 0.881076941  |
| YGL040C   | -4.632578274 | -0.4451623   | -4.183751215 |
| YGL041C   | 0.143943985  | 0.08352804   | 0.158315708  |
| YGL041C-B |              |              |              |
| YGL041W-A |              |              |              |
| YGL042C   | -0.128926613 | 0.083752374  | -0.128758291 |
| YGL043W   | -0.013266703 | -1.457780352 | -0.012108877 |
| YGL044C   |              |              |              |

|           |              |              |              |
|-----------|--------------|--------------|--------------|
| YGL045W   | -0.404626546 | 0.017460205  | -0.338558555 |
| YGL046W   | -2.296245184 | -0.318077863 | -1.66178068  |
| YGL047W   | 0.080366473  | -0.085591144 | 0.083776902  |
| YGL048C   | 2.381806061  | 2.600543623  | 2.388205008  |
| YGL049C   | 2.100181369  | 1.591472426  | 2.475677493  |
| YGL050W   | -0.065430031 | 0.82894653   | -0.070848207 |
| YGL051W   | 0.011622143  | 0.108406951  | 0.012958056  |
| YGL052W   |              |              |              |
| YGL053W   | -0.114391445 | 0.18917183   | -0.084431828 |
| YGL054C   | 2.262281454  | 0.55632328   | 2.083723893  |
| YGL055W   | 0.583277779  | 0.120729076  | 0.75846024   |
| YGL056C   | -1.430570825 | 0.002424814  | -2.019281837 |
| YGL057C   | 0.072701905  | -0.197905554 | 0.10232619   |
| YGL058W   | 0.529235087  | -0.086789744 | 0.420546776  |
| YGL059W   | -0.255817971 | -0.010095625 | -0.340487269 |
| YGL060W   | 0.046942365  | 0.086745253  | 0.066996998  |
| YGL061C   | -0.027574622 | 0.375949922  | -0.041899256 |
| YGL062W   | 0.483552358  | -0.03160051  | 0.615753882  |
| YGL063C-A |              |              |              |
| YGL063W   | -0.115904036 | 0.086759446  | -0.132270867 |
| YGL064C   | 0.004205912  | 0.333232631  | 0.004971471  |
| YGL065C   | -0.010152186 | -0.026400055 | -0.012897682 |
| YGL066W   | -0.687876671 | -0.962575871 | -0.711673833 |
| YGL067W   | -0.328577724 | -0.204869572 | -0.373012011 |
| YGL068W   | 0.110054408  | -0.007308116 | 0.139067939  |
| YGL069C   | -0.027028967 | 0.03101266   | -0.027087659 |
| YGL070C   | 2.083150772  | 2.006350194  | 0.672753245  |
| YGL071W   | 1.316945053  | 1.605090646  | 1.418190026  |
| YGL072C   | 2.511067247  | 0.005001554  | 2.130845738  |
| YGL073W   | -0.07352675  | -0.012713065 | -0.088788304 |
| YGL074C   | -0.588920809 | -0.152707767 | -0.660433778 |
| YGL075C   | -0.695361601 | 0.003793233  | -0.9601178   |
| YGL076C   | 0.08348787   | 1.209897724  | 0.048645471  |
| YGL077C   | 0.027582408  | 0.973251816  | 0.027143083  |
| YGL078C   | 0.721583753  | 0.05331301   | 0.900835537  |
| YGL079W   | 0.676706095  | -0.366201293 | 1.062801603  |
| YGL080W   | 1.138985347  | -0.978763038 | 1.379635795  |
| YGL081W   |              | -0.033395509 |              |
| YGL082W   | -0.14782489  | -1.588156085 | -0.065541956 |
| YGL083W   | -0.70895242  | -0.009465344 | -0.997399231 |
| YGL084C   | -1.670313264 | -0.160756752 | -1.687500312 |
| YGL085W   | 0.134220589  | 0.009599076  | 0.113626245  |
| YGL086W   | 0.010294635  | -0.713845887 | 0.012419407  |
| YGL087C   | 0.032924862  | -0.034514675 | 0.021773573  |
| YGL088W   | 0.305290388  | 1.445147338  | 0.260960881  |
| YGL089C   | 0.654486184  | -0.054668958 | 0.536411978  |
| YGL090W   | -0.737654095 | -1.373591089 | -0.590012081 |
| YGL091C   | -0.061067167 | 0.930691282  | -0.064340957 |
| YGL092W   | 6.496410701  | -1.487512536 | 2.97653632   |
| YGL093W   | 2.83433604   | 6.212747407  | 1.160278774  |
| YGL094C   | -0.602952914 | -0.049013398 | -0.596565004 |
| YGL095C   | 0.617348217  | -1.612384599 | 0.548984784  |
| YGL096W   | 0.194352939  | -0.99922771  | 0.24284056   |

|           |              |              |              |
|-----------|--------------|--------------|--------------|
| YGL097W   | -0.115147586 | -0.064332519 | -0.192672209 |
| YGL098W   | 0.035326036  | 1.121160754  | 0.037469776  |
| YGL099W   | -0.003589397 | 2.371297645  | -0.001461242 |
| YGL100W   |              |              |              |
| YGL101W   |              |              |              |
| YGL102C   | -0.064673935 | 1.682235914  | -0.051770683 |
| YGL103W   | -0.88301598  | 0.567009096  | -0.716540299 |
| YGL104C   |              |              |              |
| YGL105W   | 0.076901746  | 0.08384762   | 0.08088874   |
| YGL106W   |              |              |              |
| YGL107C   | 1.029867112  | -0.062169548 | 1.088231254  |
| YGL108C   | -0.820262426 | -0.080022419 | -0.94021343  |
| YGL109W   | -1.689004588 | 0.103697546  | -1.715641699 |
| YGL110C   | -1.149657574 | -0.027680874 | -1.038481092 |
| YGL111W   | -0.171595866 | -0.199558296 | -0.158100065 |
| YGL112C   | -0.7929086   | -0.123707057 | -0.617392091 |
| YGL113W   | -0.015356616 | -0.556370186 | -0.013260129 |
| YGL114W   | -0.014909573 | 0.876500197  | -0.017718264 |
| YGL115W   | -0.512768683 | -0.029573558 | -0.392916897 |
| YGL116W   | -2.786130737 | -7.81667272  | -1.019383945 |
| YGL117W   | -0.943767386 | -0.047773448 | -1.063032536 |
| YGL118C   | 0.003622524  | -0.004536701 | 0.004912564  |
| YGL119W   |              |              |              |
| YGL120C   | 0.029548043  | 0.011319725  | 0.031177571  |
| YGL121C   | -0.483124136 | 0.423612092  | -0.583513707 |
| YGL122C   | 0.0530534    | -0.027776992 | 0.068251933  |
| YGL123C-A |              |              |              |
| YGL123W   | 1.898363781  | 4.863600849  | 0.656462538  |
| YGL124C   | 0.22987212   | -0.116933298 | 0.221347156  |
| YGL125W   | -0.036907557 | 0.296518877  | -0.029936148 |
| YGL126W   | 0.010828902  | -0.391936675 | 0.011461727  |
| YGL127C   | -0.667839113 | -0.222848279 | -0.582972618 |
| YGL128C   | 0.033184044  | -0.103296655 | 0.025482799  |
| YGL129C   |              |              |              |
| YGL130W   | 1.475766658  | 0.013317366  | 1.1879588    |
| YGL131C   | -0.483584271 | 0.722674289  | -0.58625833  |
| YGL132W   | -0.015554103 | -0.026373993 | -0.017296328 |
| YGL133W   | -2.499134584 | -0.80962275  | -2.575482555 |
| YGL134W   |              |              |              |
| YGL135W   | 0.41422719   | -0.808385859 | 0.496871808  |
| YGL136C   | -2.80065686  | -0.14317675  | -1.95660463  |
| YGL137W   | -0.048424976 | -0.054905321 | -0.044919236 |
| YGL138C   | -1.2614625   | 0.299930899  | -1.406789614 |
| YGL139W   | -0.094680273 | -0.04995486  | -0.110701296 |
| YGL140C   | -0.975904947 | -1.364578697 | -0.913872285 |
| YGL141W   | 0.002511411  | 0.028650102  | 0.001970085  |
| YGL142C   | 0.006446018  | -0.02733225  | 0.005475611  |
| YGL143C   | -0.145607855 | -3.345654506 | -0.099540504 |
| YGL144C   | 0.000771795  | 0.0426695    | 0.000702994  |
| YGL145W   | 0.099131633  | 0.055681699  | 0.060883515  |
| YGL146C   | -0.801941516 | 0.613740586  | -0.821956388 |
| YGL147C   | -0.818787167 | -0.089504365 | -1.025612444 |
| YGL148W   | 0.20152942   | 0.111749022  | 0.248192686  |

|           |              |              |              |
|-----------|--------------|--------------|--------------|
| YGL149W   | 0.237992589  | 0.148542971  | 0.23603541   |
| YGL150C   | -1.750429637 | -1.618674544 | -1.458656852 |
| YGL151W   | 0.010694779  | 0.004351092  | 0.010939282  |
| YGL152C   | 0.020619585  | 0.085105919  | 0.021181648  |
| YGL153W   | -0.15136477  | 0.01962872   | -0.176756812 |
| YGL154C   | 0.027009647  | -0.039695815 | 0.028992263  |
| YGL155W   | -1.008295683 | 0.028016008  | -1.122504013 |
| YGL156W   | 0.253941782  | -0.59068633  | 0.294712223  |
| YGL157W   | -0.006437507 | -0.010411355 | -0.006865172 |
| YGL158W   | 0.042341175  | 0.602382028  | 0.047909546  |
| YGL159W   | -0.100784665 | -0.093364299 | -0.125137045 |
| YGL160W   | -0.299275731 | -1.983690708 | -0.281609718 |
| YGL161C   | 0.037740257  | 0.216207367  | 0.042696253  |
| YGL162W   | -0.042834996 | -0.008366628 | -0.040917059 |
| YGL163C   | 0.12323186   | -0.037129699 | 0.147032845  |
| YGL164C   | 0.01521113   | -0.213360044 | 0.017508695  |
| YGL165C   |              |              |              |
| YGL166W   | -0.4039289   | -0.000766997 | -0.464812517 |
| YGL167C   | -0.285562434 | -1.203942427 | -0.236750975 |
| YGL168W   | -1.276242086 | -1.651405533 | -0.962981152 |
| YGL169W   | -1.573819801 | 0.214474844  | -1.226462855 |
| YGL170C   | -1.330698024 | 0.217177246  | -1.441237594 |
| YGL171W   | -0.111960258 | -0.011557306 | -0.122986276 |
| YGL172W   | 4.824462418  | 3.882378678  | 2.633698756  |
| YGL173C   | 0.301186344  | -0.02791091  | 0.309404438  |
| YGL174W   | -0.055450903 | -0.140949911 | -0.05997289  |
| YGL175C   | -0.737265361 | -0.810885387 | -1.087332442 |
| YGL176C   | -0.368872492 | -0.183872305 | -0.374504953 |
| YGL177W   | 0.02139137   | -0.015115747 | 0.025877963  |
| YGL178W   |              |              |              |
| YGL179C   | -0.099239719 | 0.006535793  | -0.118774389 |
| YGL180W   | -0.305534562 | 0.016886107  | -0.34700281  |
| YGL181W   | 0.042909239  | 0.000856851  | 0.057343781  |
| YGL182C   |              |              |              |
| YGL183C   |              |              |              |
| YGL184C   |              |              |              |
| YGL185C   |              |              |              |
| YGL186C   |              |              |              |
| YGL187C   |              |              |              |
| YGL188C   |              |              |              |
| YGL188C-A |              |              |              |
| YGL189C   |              |              |              |
| YGL190C   |              |              |              |
| YGL191W   |              |              |              |
| YGL192W   |              |              |              |
| YGL193C   |              |              |              |
| YGL194C   | -0.012590724 | 0.399838075  | -0.017118177 |
| YGL194C-A |              |              |              |
| YGL195W   |              | 0.263565767  |              |
| YGL196W   | 0.017672115  | -0.100246682 | 0.012523332  |
| YGL197W   | -0.078302258 | -1.64860431  | -0.075989906 |
| YGL198W   | 0.005150476  | -1.475195998 | 0.003802402  |
| YGL199C   | -1.297900652 | -1.260725226 | -1.095019692 |

|           |              |              |              |
|-----------|--------------|--------------|--------------|
| YGL200C   | 0.23538114   | -0.038930755 | 0.11527211   |
| YGL201C   | -0.031794228 | -0.096167734 | -0.034807065 |
| YGL202W   |              |              |              |
| YGL203C   | 0.568461236  | 0.69751829   | 0.534031092  |
| YGL204C   |              |              |              |
| YGL205W   | 0.121204651  | 0.495199363  | 0.126168465  |
| YGL206C   | -8.298103855 | -5.044445737 | -4.893473555 |
| YGL207W   | 1.493329102  | -0.009999689 | 1.019900539  |
| YGL208W   | 0.021076267  | -0.014219565 | 0.019942141  |
| YGL209W   | -5.511371343 | -0.806767562 | -2.09717678  |
| YGL210W   |              | 0.583536728  |              |
| YGL211W   | 0.441670716  | -0.016349831 | 0.325954153  |
| YGL212W   | 0.02565703   | -0.893712635 | 0.023632409  |
| YGL213C   | -0.533096139 | 0.320673148  | -0.646320464 |
| YGL214W   | -0.370085042 | -0.866400589 | -0.293050146 |
| YGL215W   | 0.003431042  | 1.167520377  | 0.002147148  |
| YGL216W   | -0.348501446 | -0.352644457 | -0.323930102 |
| YGL217C   | -1.877056102 | 0.040969966  | -2.174273618 |
| YGL218W   | -0.087614212 | 0.056371371  | -0.106821514 |
| YGL219C   | -1.638926127 | -1.36E-05    | -1.820015072 |
| YGL220W   | -0.340600839 | 0.002415282  | -0.286461057 |
| YGL221C   | 0.051659633  | 0.229355273  | 0.042944323  |
| YGL222C   | 1.189756964  | 0.421478148  | 1.432455015  |
| YGL223C   | 0.077133346  | -0.06675397  | 0.08202878   |
| YGL224C   |              |              |              |
| YGL225W   | 0.459659158  | 0.065911233  | 0.498920024  |
| YGL226C-A | 0.250052691  | 0.471799223  | 0.149552494  |
| YGL226W   | -0.284316588 | 0.895875228  | -0.367432801 |
| YGL227W   | 1.045015134  | 0.753183317  | 0.791816627  |
| YGL228W   | -4.605036492 | -4.037336111 | -1.455097635 |
| YGL229C   | -0.029136118 | 0.384461077  | -0.02622852  |
| YGL230C   | 0.569431741  | -0.450848355 | 0.806096898  |
| YGL231C   | 0.052343701  | 1.072085465  | 0.060435421  |
| YGL232W   | 12.26756361  | 0.42110793   | 3.314354996  |
| YGL233W   | 0.011400072  | -0.027384248 | 0.013974574  |
| YGL234W   |              |              |              |
| YGL235W   | -2.962619149 | -1.231432817 | -3.311611923 |
| YGL236C   | 0.42050963   | 0.216603625  | 0.566984124  |
| YGL237C   | 0.051584561  | -0.009787675 | 0.026020311  |
| YGL238W   | 1.012911798  | -0.223037886 | 0.903971006  |
| YGL239C   | 0.142011796  | -0.055533653 | 0.153053256  |
| YGL240W   | 0.027908841  | 0.868548534  | 0.035435486  |
| YGL241W   | 0.323597414  | 0.105829599  | 0.324743327  |
| YGL242C   | 0.673142349  | 0.893212253  | 0.717452144  |
| YGL243W   | 0.04515347   | -0.573176696 | 0.058377354  |
| YGL244W   | -0.020849192 | 0.017528277  | -0.017360638 |
| YGL245W   | 0.534593715  | -0.127221876 | 0.468825921  |
| YGL246C   | 0.86604378   | -0.013695595 | 0.814399261  |
| YGL247W   | 0.331879533  | 0.078926988  | 0.374145395  |
| YGL248W   | 0.120673378  | 0.000665756  | 0.121357435  |
| YGL249W   | 1.056969412  | 0.806429344  | 1.035922653  |
| YGL250W   | 0.263503924  | 1.018556992  | 0.347644477  |
| YGL251C   | 0.132315359  | -0.064919417 | 0.118752129  |

|           |              |              |              |
|-----------|--------------|--------------|--------------|
| YGL252C   | -5.371574945 | -0.029528457 | -4.653650364 |
| YGL253W   | 0.500752631  | -0.676601119 | 0.649368716  |
| YGL254W   | 0.807001786  | 0.125826684  | 0.943702103  |
| YGL255W   | -0.000516863 | 0.141008009  | -0.000622644 |
| YGL256W   | -0.027640917 | 0.081982512  | -0.023130526 |
| YGL257C   | 0.842459738  | 0.165321971  | 1.088618408  |
| YGL258W   | 0.089655133  | 0.222008155  | 0.079472554  |
| YGL258W-A |              |              |              |
| YGL259W   | 0.568832713  | 0.115807873  | 0.543816326  |
| YGL260W   | 0.191833122  | 1.577641395  | 0.196272175  |
| YGL261C   | 0.083998482  | 0.041858179  | 0.083724325  |
| YGL262W   | 0.351494973  | 0.539073854  | 0.439963634  |
| YGL263W   | 0.099559795  | 0.506969462  | 0.119204016  |
| YGR001C   | 0.021331864  | -0.063179578 | 0.028121706  |
| YGR002C   | -0.027592393 | 0.549350561  | -0.028743625 |
| YGR003W   | 1.226455575  | 1.267373036  | 1.246477877  |
| YGR004W   | 1.20047676   | 1.086074999  | 1.172839464  |
| YGR005C   | -0.058023605 | -0.021006006 | -0.058068839 |
| YGR006W   | -0.414515101 | 0.641113215  | -0.528888969 |
| YGR007W   | 0.001193975  | 0.74669948   | 0.001383536  |
| YGR008C   | 1.090901572  | 0.0004824    | 1.173550441  |
| YGR009C   | 0.214208514  | 1.287938646  | 0.257643283  |
| YGR010W   | 0.477548694  | 0.023108423  | 0.527209302  |
| YGR011W   | -1.183850533 | -0.014698081 | -1.417940271 |
| YGR012W   | 0.242110103  | 0.460570165  | 0.381733284  |
| YGR013W   | -0.006965971 | 0.725279374  | -0.011260022 |
| YGR014W   | 0.394414186  | 0.020242575  | 0.462584526  |
| YGR015C   | 0.031545643  | 0.015524006  | 0.037204764  |
| YGR016W   | 0.150586708  | 0.282596843  | 0.164255556  |
| YGR017W   | 2.420429744  | 0.004956551  | 2.794884071  |
| YGR018C   | 1.200947678  | 0.784866787  | 1.390441107  |
| YGR019W   | 1.264767553  | 0.055970338  | 1.472121906  |
| YGR020C   | -0.130191301 | -0.685530736 | -0.105163966 |
| YGR021W   | 0.233400556  | 0.272896918  | 0.234052792  |
| YGR022C   | -0.298674211 | -0.147542868 | -0.417388766 |
| YGR023W   | 0.074017373  | 0.235548601  | 0.094024557  |
| YGR024C   | -0.673436669 | -0.115406435 | -0.682029567 |
| YGR025W   | -0.809574754 | -0.002996585 | -1.164211525 |
| YGR026W   | -0.043405664 | 0.116973083  | -0.04870884  |
| YGR027C   | 2.905456645  | 2.376844294  | 1.552276252  |
| YGR028W   | 0.025930583  | 0.009755131  | 0.03469081   |
| YGR029W   | -0.38819715  | -0.014680287 | -0.443125713 |
| YGR030C   | 0.031174373  | 0.385572721  | 0.035291981  |
| YGR031C-A |              |              |              |
| YGR031W   | 0.003245433  | 0.050712375  | 0.003831324  |
| YGR032W   | 0.001076679  | -0.016269816 | 0.001373993  |
| YGR033C   | -0.001508595 | -0.32375522  | -0.001735836 |
| YGR034W   | 2.192394754  | 6.098514514  | 1.129420387  |
| YGR035C   | 1.931103681  | 0.240106007  | 1.833660381  |
| YGR035W-A |              |              |              |
| YGR036C   | 0.017860695  | 0.839739261  | 0.018415585  |
| YGR037C   |              | 0.864030042  |              |
| YGR038W   | 0.066116769  | 0.006281486  | 0.090382068  |

|           |              |              |              |
|-----------|--------------|--------------|--------------|
| YGR039W   | -0.028914625 | -0.003386526 | -0.028353396 |
| YGR040W   | 2.056354783  | -0.029990403 | 1.831337712  |
| YGR041W   | -0.748924808 | 0.886770921  | -0.778238894 |
| YGR042W   | 0.300902646  | -0.032340515 | 0.365813954  |
| YGR043C   | 0.014893968  | 0.977808149  | 0.018424613  |
| YGR044C   | -0.172581749 | 0.015270819  | -0.208027337 |
| YGR045C   | 0.12745139   | -0.003258523 | 0.142831521  |
| YGR046W   | -0.175768587 | -0.141570467 | -0.130420933 |
| YGR047C   | 1.531645089  | 0.078362872  | 1.437464621  |
| YGR048W   | 0.391565308  | 0.09332569   | 0.316199542  |
| YGR049W   | -0.022649347 | 0.022803451  | -0.026000566 |
| YGR050C   | 0.794519231  | 4.15262123   | 0.484783199  |
| YGR051C   | 0.024758803  | -0.033004219 | 0.024021674  |
| YGR052W   | 0.038179794  | -0.024847502 | 0.050469223  |
| YGR053C   | 2.237401455  | -1.091637509 | 2.138507195  |
| YGR054W   | 0.416287752  | -2.84830538  | 0.314325309  |
| YGR055W   | -0.907551073 | -0.283106188 | -1.0017221   |
| YGR056W   | 1.745245725  | 0.382517794  | 1.846847247  |
| YGR057C   | -0.0135187   | -0.606814431 | -0.01640165  |
| YGR058W   | 0.007047496  | 0.579064731  | 0.009658175  |
| YGR059W   | 0.111474649  | 0.107231906  | 0.087446154  |
| YGR060W   | 2.540088772  | -0.008747204 | 2.062025445  |
| YGR061C   | 0.265127715  | -0.301659153 | 0.295398548  |
| YGR062C   |              |              |              |
| YGR063C   | 0.595404974  | 1.202206584  | 0.329628862  |
| YGR064W   | 0.468555177  | 3.126756744  | 0.296162614  |
| YGR065C   | -0.058014348 | -0.274128728 | -0.070487994 |
| YGR066C   | 0.03493232   | 1.281986318  | 0.038044881  |
| YGR067C   | 1.018280577  | -2.027687561 | 1.160304085  |
| YGR068C   | -0.288196657 | 2.051970788  | -0.234577494 |
| YGR068W-A |              |              |              |
| YGR069W   | 0.01140578   | -1.275818318 | 0.013203063  |
| YGR070W   | 0.252670878  | 0.854744072  | 0.264126035  |
| YGR071C   | -2.224843251 | -0.263640705 | -1.8145607   |
| YGR072W   | -0.112225579 | -1.010797272 | -0.118014621 |
| YGR073C   | 0.065680071  | -0.632073952 | 0.078066245  |
| YGR074W   | -0.151420304 | -0.937593392 | -0.129604535 |
| YGR075C   | -1.9723792   | -2.217400176 | -1.420136975 |
| YGR076C   | 0.123019949  | -0.002762157 | 0.121564848  |
| YGR077C   | -0.010660847 | 0.004857386  | -0.014587674 |
| YGR078C   | 0.300685165  | 0.02892499   | 0.34788225   |
| YGR079W   | 2.151293233  | 0.021381804  | 1.844911117  |
| YGR080W   | 0.098881316  | -0.02290033  | 0.127441797  |
| YGR081C   | 0.389662835  | 1.253125433  | 0.383837825  |
| YGR082W   | -0.054500334 | -0.131458243 | -0.050011686 |
| YGR083C   | -4.169126066 | -3.401064773 | -2.821862085 |
| YGR084C   | 0.055750821  | 0.048407588  | 0.052156866  |
| YGR085C   | 0.039478104  | -1.256879149 | 0.027111904  |
| YGR086C   | -0.195647463 | -0.260729936 | -0.230418696 |
| YGR087C   | -0.261726391 | -0.308739261 | -0.275586518 |
| YGR088W   | 0.072582619  | -0.586793381 | 0.067395959  |
| YGR089W   | 0.079802398  | -1.245382127 | 0.06287967   |
| YGR090W   | 0.380330286  | 0.130775088  | 0.337989255  |



|           |              |              |              |
|-----------|--------------|--------------|--------------|
| YGR091W   | 0.478202663  | -0.056167872 | 0.540873951  |
| YGR092W   | -0.086304995 | -0.292765348 | -0.076729539 |
| YGR093W   | 0.783231214  | 0.09744299   | 0.975399186  |
| YGR094W   | 0.845068796  | 0.065665298  | 0.809923082  |
| YGR095C   | 16.81494006  | 11.89604678  | 3.940567711  |
| YGR096W   | 0.074836688  | 0.157924114  | 0.074617072  |
| YGR097W   | 0.094916737  | 0.261339063  | 0.119156149  |
| YGR098C   | 0.008241063  | 1.659043394  | 0.005981549  |
| YGR099W   | -0.701311921 | 0.07318094   | -0.695160488 |
| YGR100W   | 0.009616989  | 0.068008888  | 0.012832911  |
| YGR101W   | -0.010566349 | 0.50609391   | -0.011759964 |
| YGR102C   | -0.002859868 | -0.055868244 | -0.003998381 |
| YGR103W   | 0.06319489   | -0.005947394 | 0.082055812  |
| YGR104C   | -1.409301447 | -0.026057207 | -1.495233936 |
| YGR105W   | 0.045629443  | -0.415668492 | 0.05326993   |
| YGR106C   | -20.8135418  | -11.278149   | -26.0045981  |
| YGR107W   | 0.779177247  | -0.026569526 | 1.000638247  |
| YGR108W   | -0.268780392 | -0.066270925 | -0.249438241 |
| YGR109C   | -0.037705043 | -0.03705316  | -0.04802325  |
| YGR110W   |              |              |              |
| YGR111W   | -0.113843043 | -0.314330196 | -0.14157115  |
| YGR112W   | -0.207061461 | 1.077603008  | -0.211049455 |
| YGR113W   | -0.972194332 | -0.106870469 | -1.251708185 |
| YGR114C   | -0.285751249 | -3.235545658 | -0.212268781 |
| YGR115C   | 0.006315142  | -3.309744996 | 0.003563557  |
| YGR116W   | 0.010133506  | -4.560256932 | 0.004234579  |
| YGR117C   | -0.004379788 | -0.103176663 | -0.003327535 |
| YGR118W   | 5.160973985  | 0.568576144  | 2.853497566  |
| YGR119C   | 3.413862836  | 2.320542513  | 1.93844356   |
| YGR120C   | 0.527599072  | 0.002044842  | 0.630242522  |
| YGR121C   | -0.030306014 | 0.099856125  | -0.034862764 |
| YGR121W-A |              |              |              |
| YGR122C-A | 0.513423246  | -2.307762929 | 0.527700497  |
| YGR122W   | -0.02583588  | 0.894532495  | -0.027129295 |
| YGR123C   | -0.652519284 | -1.29963034  | -0.479239888 |
| YGR124W   | -0.01840215  | -0.325200365 | -0.017975455 |
| YGR125W   | 0.019248852  | -0.049332269 | 0.023504741  |
| YGR126W   | -0.039853676 | 0.090636337  | -0.043018869 |
| YGR127W   | -0.433376818 | -0.955506926 | -0.562016125 |
| YGR128C   | 0.322335052  | -2.248784427 | 0.253279582  |
| YGR129W   | -0.099005558 | -3.33188187  | -0.097650666 |
| YGR130C   | -0.148199715 | 0.076939876  | -0.092229371 |
| YGR131W   | 0.913875585  | -0.019692419 | 0.925425381  |
| YGR132C   | 1.42044775   | 1.69546141   | 1.224450319  |
| YGR133W   | 0.026244697  | -0.066926505 | 0.035727696  |
| YGR134W   | -1.666536072 | -2.174639847 | -1.481924179 |
| YGR135W   | 3.875857441  | 1.858979737  | 2.884218057  |
| YGR136W   | 0.001089699  | -1.774542705 | 0.001310347  |
| YGR137W   | 0.085820935  | 0.751342376  | 0.111675685  |
| YGR138C   | 0.032844517  | 1.314770675  | 0.036284573  |
| YGR139W   | 0.260668161  | 0.09996149   | 0.298657944  |
| YGR140W   | -0.038952456 | -0.064627298 | -0.055790374 |
| YGR141W   | 0.304135442  | 0.517450333  | 0.425933449  |

|           |              |              |              |
|-----------|--------------|--------------|--------------|
| YGR142W   | 1.119452352  | 1.657494913  | 1.212987244  |
| YGR143W   | 0.065089638  | -0.131608986 | 0.060330703  |
| YGR144W   | -4.111196126 | 0.056182182  | -3.014234226 |
| YGR145W   | -0.108409928 | -0.073628083 | -0.103366985 |
| YGR146C   | -0.008629961 | -0.270614252 | -0.011342807 |
| YGR146C-A |              |              |              |
| YGR147C   | -0.145858346 | 0.077285468  | -0.130473131 |
| YGR148C   | -0.386338129 | -5.961362023 | -0.258357625 |
| YGR149W   | 0.051432182  | -0.014147031 | 0.074979678  |
| YGR150C   | 0.619948853  | -0.117999563 | 0.872258281  |
| YGR151C   | 1.209032951  | 0.156270134  | 1.437368556  |
| YGR152C   | 0.001094862  | -0.650719645 | 0.000978062  |
| YGR153W   | -0.0447252   | -0.675418913 | -0.047519116 |
| YGR154C   | -1.734521348 | -1.826817531 | -1.596450983 |
| YGR155W   | 0.195577925  | -0.625020367 | 0.215650695  |
| YGR156W   | -0.070478717 | -2.566526587 | -0.063968128 |
| YGR157W   | -0.509489304 | -1.54737764  | -0.373011838 |
| YGR158C   | 11.40276916  | 8.034105332  | 3.749849628  |
| YGR159C   | 1.00513603   | 0.644140901  | 0.746729614  |
| YGR160W   | 0.081840443  | 1.380157057  | 0.072264233  |
| YGR161C   | 0.117655009  | 0.106404389  | 0.120780378  |
| YGR161W-C |              |              |              |
| YGR162W   | 6.051855385  | 3.072686344  | 5.388793999  |
| YGR163W   | 0.534654174  | -0.528849253 | 0.513160301  |
| YGR164W   | 0.42190273   | 1.167746628  | 0.501468304  |
| YGR165W   | 2.290381852  | -0.14038067  | 2.283194426  |
| YGR166W   | 0.020898035  | -0.431556611 | 0.017318475  |
| YGR167W   | -2.199382692 | -0.318592573 | -2.295512398 |
| YGR168C   | 0.94732898   | 0.042013849  | 1.16303177   |
| YGR169C   | -0.007618831 | 0.068410554  | -0.011667109 |
| YGR169C-A |              |              |              |
| YGR170W   | 1.224018356  | -0.099648628 | 1.753571343  |
| YGR171C   | 0.649186561  | -0.001900731 | 0.940771584  |
| YGR172C   | 2.093422459  | 0.676952697  | 1.748414363  |
| YGR173W   | -0.000624099 | 0.009560246  | -0.000777358 |
| YGR174C   | 0.267073232  | -0.094992126 | 0.280504525  |
| YGR174W-A |              |              |              |
| YGR175C   | 0.274993839  | -0.183187797 | 0.327385658  |
| YGR176W   | 0.09463883   | 0.936442471  | 0.127516082  |
| YGR177C   | 0.023568108  | 0.315572293  | 0.030425625  |
| YGR178C   | -8.473530997 | -1.778461032 | -6.104258858 |
| YGR179C   | -0.014259079 | -0.867349331 | -0.019655318 |
| YGR180C   | 1.741804508  | 0.191747756  | 2.275118696  |
| YGR181W   | 1.676892858  | 0.072175727  | 1.865554351  |
| YGR182C   | 0.015655719  | 0.059389151  | 0.023191524  |
| YGR183C   | 0.87995611   | 1.141978321  | 0.955598544  |
| YGR184C   | -1.177102519 | -0.502024916 | -0.580153788 |
| YGR185C   | -0.906919091 | -0.043963673 | -1.03719005  |
| YGR186W   | -4.667235426 | -0.911388667 | -5.067586631 |
| YGR187C   | 0.581979084  | 0.014724523  | 0.560592327  |
| YGR188C   | 0.970804974  | 1.62538395   | 0.386601904  |
| YGR189C   | 0.102082638  | 0.049236316  | 0.122364866  |
| YGR190C   | 0.046462657  | 0.034456097  | 0.049453613  |

|           |              |              |              |
|-----------|--------------|--------------|--------------|
| YGR191W   | 0.120636167  | -0.39473241  | 0.12673048   |
| YGR192C   | 0.308654607  | 0.383994094  | 0.267271816  |
| YGR193C   | 0.039990102  | -0.206666693 | 0.045516803  |
| YGR194C   | 0.081415723  | -0.000488901 | 0.096505363  |
| YGR195W   | 1.508680879  | 2.368993763  | 0.971402839  |
| YGR196C   | 0.780038787  | 0.110460749  | 1.032702416  |
| YGR197C   | 0.925934415  | -0.001367138 | 1.194894719  |
| YGR198W   | -3.564762666 | -0.283687736 | -3.037477787 |
| YGR199W   | -0.008256079 | -0.003656739 | -0.010920587 |
| YGR200C   | -0.000100249 | 1.039598656  | -0.000118877 |
| YGR201C   | 0.170142289  | 1.09126342   | 0.161362539  |
| YGR202C   | -3.781435726 | -2.710522819 | -2.795628323 |
| YGR203W   | 0.081641388  | 0.001067925  | 0.08623946   |
| YGR204C-A |              |              |              |
| YGR204W   | 0.143201224  | 0.005824206  | 0.101967328  |
| YGR205W   | -2.423493248 | -0.040079027 | -2.54590389  |
| YGR206W   | 0.141288786  | 0.059632764  | 0.166039713  |
| YGR207C   | 0.465226489  | -0.126426315 | 0.609958881  |
| YGR208W   | 0.086451281  | 0.242236113  | 0.107570202  |
| YGR209C   | -15.13153426 | -18.36180715 | -3.761781808 |
| YGR210C   | -1.749889501 | -0.162864635 | -1.679526847 |
| YGR211W   | 0.20311552   | -0.013521134 | 0.335380919  |
| YGR212W   | 0.001547296  | 0.028793417  | 0.00171987   |
| YGR213C   | 0.457806862  | -0.044696471 | 0.547443357  |
| YGR214W   | 5.078405376  | 2.921417523  | 3.293331633  |
| YGR215W   | 0.783156761  | 1.063517236  | 1.154025978  |
| YGR216C   | -0.009498412 | -0.038017021 | -0.010924298 |
| YGR217W   |              |              |              |
| YGR218W   | 0.2871097    | -0.18098742  | 0.24154047   |
| YGR219W   | 0.030730768  | -0.091205078 | 0.036897736  |
| YGR220C   | -0.044094085 | -0.186679641 | -0.053914444 |
| YGR221C   | -0.039889613 | 0.546854677  | -0.046705148 |
| YGR222W   | -0.195921439 | 0.044580532  | -0.255993556 |
| YGR223C   | 0.131690784  | 1.935675986  | 0.047933674  |
| YGR224W   | -0.041894352 | 0.002800102  | -0.05859611  |
| YGR225W   | 0.066496631  | 0.908903554  | 0.093026708  |
| YGR226C   | -0.012457297 | 0.075819348  | -0.01833195  |
| YGR227W   | -0.221694678 | 0.034973438  | -0.280771288 |
| YGR228W   | -0.087813229 | -0.972395467 | -0.090973922 |
| YGR229C   | 0.165566246  | -1.776460352 | 0.198699834  |
| YGR230W   | 0.1512714    |              | 0.160114528  |
| YGR231C   | -0.036387494 | -0.200286368 | -0.034869162 |
| YGR232W   | 0.061364001  | 0.033692053  | 0.073429189  |
| YGR233C   | 0.232159558  | -0.278120119 | 0.175816588  |
| YGR234W   | -0.600645951 | -0.687942439 | -0.598274645 |
| YGR235C   | -0.012657431 | -0.155706477 | -0.01688319  |
| YGR236C   | 0.009766811  | 1.11305878   | 0.01394921   |
| YGR237C   | -0.625503627 | 0.031168525  | -0.747122905 |
| YGR238C   | -0.002642915 | -0.637125406 | -0.002529106 |
| YGR239C   | 0.000207862  | -0.018100515 | 0.000215349  |
| YGR240C   | -1.663250581 | 0.037025957  | -1.729787794 |
| YGR240C-A |              |              |              |
| YGR241C   | -0.357102339 | -2.140703123 | -0.404415134 |

|           |              |              |              |
|-----------|--------------|--------------|--------------|
| YGR242W   | -0.274654593 | -0.130018425 | -0.425004527 |
| YGR243W   | -0.029079616 | -0.00990492  | -0.033230397 |
| YGR244C   |              |              |              |
| YGR245C   | -0.011189398 | 0.026828138  | -0.013297464 |
| YGR246C   | -0.798167861 | 0.066525891  | -0.910301168 |
| YGR247W   | -0.660040389 | -0.005553716 | -0.957252601 |
| YGR248W   | -1.135002355 |              | -0.800005327 |
| YGR249W   | -0.050210865 | -0.084223889 | -0.059785941 |
| YGR250C   | -2.10392433  | -0.002096075 | -1.882045952 |
| YGR251W   | -0.009301464 | -0.013432242 | -0.014002609 |
| YGR252W   | -0.444306004 | -0.998551027 | -0.287347535 |
| YGR253C   | 8.8745587    | 1.234327324  | 4.881819441  |
| YGR254W   | -0.825360101 | 0.298196893  | -0.778174053 |
| YGR255C   | 8.22340758   | 8.201989259  | 3.4914324    |
| YGR256W   | -0.063164723 | -0.241832815 | -0.071838295 |
| YGR257C   | 0.061051601  | 0.050902093  | 0.052008044  |
| YGR258C   | -0.042589762 | -1.158735514 | -0.042724895 |
| YGR259C   | 0.117441906  | 0.770452195  | 0.119589425  |
| YGR260W   | 0.693817973  | 0.165503897  | 0.865159971  |
| YGR261C   | -0.100288202 | -3.173535106 | -0.071927405 |
| YGR262C   | -1.056033097 | 0.014076813  | -1.185894105 |
| YGR263C   | -0.879610064 | 0.165763951  | -1.007367512 |
| YGR264C   | 0.038258183  | -0.323101987 | 0.051561071  |
| YGR265W   | -2.427623621 | -0.233640812 | -2.544249572 |
| YGR266W   | -0.001853171 | 0.138674205  | -0.001918013 |
| YGR267C   | 0.147464508  | -0.171996629 | 0.172765071  |
| YGR268C   | 0.296295055  | 0.192614318  | 0.34265747   |
| YGR269W   | 0.045530607  | -0.021258986 | 0.054297383  |
| YGR270C-A |              |              |              |
| YGR270W   | -0.503006788 | -0.667027999 | -0.595347635 |
| YGR271C-A |              |              |              |
| YGR271W   | 1.544786595  | -0.044509402 | 1.427882439  |
| YGR272C   | -0.001431722 | -1.713236257 | -0.001452265 |
| YGR273C   | 1.085049752  | 0.0094791    | 1.064858902  |
| YGR274C   | 12.01524276  | -18.3779852  | 3.407056695  |
| YGR275W   | 0.118910587  | 0.96072669   | 0.158677163  |
| YGR276C   | -0.048686983 | 0.613061029  | -0.035211572 |
| YGR277C   | 0.179043631  | -0.024033888 | 0.175799989  |
| YGR278W   | 0.185501865  | 0.19814333   | 0.176183633  |
| YGR279C   | 0.535329354  | 1.032199319  | 0.544530603  |
| YGR280C   | -0.041007683 | 1.645660409  | -0.035419433 |
| YGR281W   | 5.064093839  | -8.118214502 | 2.699404032  |
| YGR282C   | 0.014102377  | 1.099940907  | 0.011813816  |
| YGR283C   | -0.155390376 | -0.047456668 | -0.206302606 |
| YGR284C   | 1.971549742  | 0.058352715  | 1.963650511  |
| YGR285C   | 0.319599989  | -0.014618662 | 0.330060595  |
| YGR286C   | -1.074134238 | 0.480958409  | -0.910295241 |
| YGR287C   | -0.029937822 | -0.944196299 | -0.03719614  |
| YGR288W   | -0.024558118 | -0.296701927 | -0.029027094 |
| YGR289C   | -9.811192948 | -15.15304519 | -2.353625717 |
| YGR290W   | -0.622740821 | -1.808412198 | -0.478397068 |
| YGR291C   | 0.925242205  | 0.15420745   | 0.883090484  |
| YGR292W   | 1.321392487  | -0.112068436 | 1.391559836  |

|           |              |              |              |
|-----------|--------------|--------------|--------------|
| YGR293C   |              |              |              |
| YGR294W   |              |              |              |
| YGR295C   | 1.945174626  | 1.993356074  | 1.506176873  |
| YGR296C-A |              |              |              |
| YGR296C-B |              |              |              |
| YGR296W   |              |              |              |
| YHL001W   |              |              |              |
| YHL002C-A |              |              |              |
| YHL002W   | -0.057857609 | -1.789721081 | -0.05172512  |
| YHL003C   | 0.015996947  | -0.643170427 | 0.023359542  |
| YHL004W   |              |              |              |
| YHL005C   | 0.004774419  | -0.05761545  | 0.00648325   |
| YHL006C   | 0.354406359  | 0.026593645  | 0.438505456  |
| YHL006W-A |              |              |              |
| YHL007C   | -0.760339191 | 0.535174494  | -0.836080285 |
| YHL008C   | 0.08971168   | 0.075910836  | 0.084134669  |
| YHL009C   | 0.15814255   | -0.090303448 | 0.145841223  |
| YHL010C   | 0.413621714  | -0.107205657 | 0.667449423  |
| YHL011C   | 0.035455753  | -0.869906624 | 0.031721707  |
| YHL012W   | -0.046802568 | 1.214274054  | -0.044499211 |
| YHL013C   | 1.26051496   | 0.471115141  | 1.754719596  |
| YHL014C   | -8.14920711  | -6.584863331 | -4.694491949 |
| YHL015W   | 7.311618198  | 0.274988283  | 2.490049565  |
| YHL015W-A |              |              |              |
| YHL016C   | 1.516801852  | 0.132319501  | 1.50989657   |
| YHL017W   | -0.00170826  | -0.00658647  | -0.002446119 |
| YHL018W   |              |              |              |
| YHL019C   | -2.425714604 | -1.222424945 | -1.325493975 |
| YHL019W-A |              |              |              |
| YHL020C   | 0.083261131  | 1.237304204  | 0.117827643  |
| YHL021C   | -0.023069499 | -0.503503808 | -0.029037523 |
| YHL022C   | 0.958492812  | 1.873936927  | 1.07091206   |
| YHL023C   | -1.682553683 | -0.87242967  | -1.090824294 |
| YHL024W   | -0.002747192 | 0.014300182  | -0.001765732 |
| YHL025W   | -2.34826551  | -1.401176552 | -1.35817013  |
| YHL026C   | 0.110844556  | -0.056122701 | 0.161728737  |
| YHL027W   | 0.047924573  | -0.821117858 | 0.056195595  |
| YHL028W   | 0.140791503  | 0.026399685  | 0.226295921  |
| YHL029C   | 1.638272453  | -1.484931411 | 1.699694584  |
| YHL030W   | -0.133158344 | -0.079610814 | -0.141728526 |
| YHL030W-A |              |              |              |
| YHL031C   | -0.023571378 | 0.000551778  | -0.021612541 |
| YHL032C   | -0.015680592 | -0.00602638  | -0.019924791 |
| YHL033C   | 0.153651793  | 0.422984904  | 0.208578063  |
| YHL034C   | -15.09185983 | -13.82066101 | -4.612527635 |
| YHL034W-A |              |              |              |
| YHL035C   | 0.091265788  | -0.266898551 | 0.111249765  |
| YHL036W   | -0.667385712 | -0.021454932 | -0.513967313 |
| YHL037C   | 0.289567675  | 0.254212594  | 0.266888693  |
| YHL038C   | -0.024412008 | 0.110886198  | -0.036078771 |
| YHL039W   | 0.669891067  | -0.25827086  | 0.438758026  |
| YHL040C   | -2.953004392 | -0.032445953 | -2.441695424 |
| YHL041W   | 0.032605845  | -0.067817789 | 0.032182384  |

|           |              |              |              |
|-----------|--------------|--------------|--------------|
| YHL042W   | -9.527916926 | -5.995197398 | -5.572571187 |
| YHL043W   | 0.127821409  | -0.037428555 | 0.156172904  |
| YHL044W   | 0.051359118  | -0.150668115 | 0.053442805  |
| YHL045W   | 0.110667472  | 1.378758281  | 0.117193777  |
| YHL046C   | 1.08424025   | 1.828254605  | 1.244825013  |
| YHL046W-A |              |              |              |
| YHL047C   | 1.764519908  | 0.015883676  | 1.680756565  |
| YHL048C-A |              |              |              |
| YHL048W   |              |              |              |
| YHL049C   |              |              |              |
| YHL050C   |              |              |              |
| YHL050W-A |              |              |              |
| YHR001W   |              |              |              |
| YHR001W-A | -1.643995817 | -1.766781241 | -1.432313079 |
| YHR002W   |              |              |              |
| YHR003C   | -0.126361911 | -0.000251647 | -0.138797463 |
| YHR004C   | -0.155986167 | 0.518969564  | -0.137048407 |
| YHR005C   | -0.036442355 | 0.068479329  | -0.040944236 |
| YHR005C-A | -0.150707353 | -2.130257345 | -0.134670515 |
| YHR006W   | 0.022703282  | 0.007754549  | 0.022917321  |
| YHR007C   | -0.05432026  | 0.049198854  | -0.062806822 |
| YHR007C-A |              |              |              |
| YHR008C   | 0.025668371  | -0.047332052 | 0.029982961  |
| YHR009C   | 1.920985026  | 1.151333459  | 1.635268672  |
| YHR010W   | 1.131756647  | 0.074222037  | 0.269708925  |
| YHR011W   | 10.86520236  | 1.097585113  | 4.010873397  |
| YHR012W   | -0.418795226 | -0.0176611   | -0.60390331  |
| YHR013C   | 0.118009129  | 0.919945611  | 0.154907517  |
| YHR014W   | 0.182107241  | -0.044826287 | 0.181539733  |
| YHR015W   | 0.053325144  | 0.063154188  | 0.057253383  |
| YHR016C   | -0.686996451 | 0.011382459  | -0.887012217 |
| YHR017W   | 1.472414829  | -0.069030059 | 1.200087762  |
| YHR018C   | 1.379295756  | -0.137366978 | 1.390189234  |
| YHR019C   | 0.139947407  | 1.432802578  | 0.164521194  |
| YHR020W   | 0.135350411  | -0.059369693 | 0.143641576  |
| YHR021C   | 6.597274607  | 3.998258844  | 2.007871782  |
| YHR021W-A | 0.278214777  | 0.030505727  | 0.290849541  |
| YHR022C   | 1.103938305  | 2.002633086  | 0.943372708  |
| YHR022C-A |              |              |              |
| YHR023W   | 0.562067896  | -0.135720461 | 0.614627279  |
| YHR024C   | 1.778090435  | 0.28896025   | 1.371419516  |
| YHR025W   | -0.837607666 | 0.240669163  | -0.77457739  |
| YHR026W   | -2.454816638 | -3.44653882  | -1.426175937 |
| YHR027C   |              |              |              |
| YHR028C   | -1.697438416 | -0.090893934 | -1.252100584 |
| YHR028W-A |              |              |              |
| YHR029C   | -1.947831469 | -1.785416159 | -1.360509721 |
| YHR030C   | -0.007210375 | 0.554156602  | -0.007678884 |
| YHR031C   | 0.31901851   | -0.065207423 | 0.345246472  |
| YHR032C-A |              |              |              |
| YHR032W   | -0.089107804 | -0.584528181 | -0.088497124 |
| YHR032W-A |              |              |              |
| YHR033W   | 0.721351802  | -0.006238679 | 0.832228923  |

|           |              |              |              |
|-----------|--------------|--------------|--------------|
| YHR034C   | 1.979638301  | -0.085323426 | 1.986766552  |
| YHR035W   | -14.09971806 | -17.84092482 | -6.08297333  |
| YHR036W   | 1.577285014  | -0.100462027 | 1.619251361  |
| YHR037W   | 0.043882619  | -1.377296764 | 0.051733944  |
| YHR038W   | 4.154903479  | 2.506055474  | 2.081120102  |
| YHR039C   | 2.068425543  | -0.048174883 | 2.217862613  |
| YHR039C-A |              |              |              |
| YHR039C-B | -2.208745276 | -0.00832599  | -1.751227174 |
| YHR040W   |              |              |              |
| YHR041C   | 0.005678827  | -0.006942422 | 0.007862611  |
| YHR042W   | 0.058629498  | -0.169197495 | 0.081372256  |
| YHR043C   | 0.739559927  | 0.149476164  | 0.86364293   |
| YHR044C   | -0.179052465 | 0.4253236    | -0.22348328  |
| YHR045W   | -0.142345261 | -2.28149702  | -0.111707919 |
| YHR046C   | 0.002281682  | -0.012097386 | 0.003145354  |
| YHR047C   | 0.167910655  | -0.117877859 | 0.140300293  |
| YHR048W   | 0.019968294  | -0.2558091   | 0.021829638  |
| YHR049C-A | 1.120710301  | -0.016989452 | 1.326488165  |
| YHR049W   | 0.020311033  | -0.509616371 | 0.022474533  |
| YHR050W   | 1.393159265  | 0.150555666  | 1.06618      |
| YHR050W-A |              |              |              |
| YHR051W   | -0.008244445 | -0.175150206 | -0.008187013 |
| YHR052W   |              |              |              |
| YHR052W-A |              |              |              |
| YHR053C   |              |              |              |
| YHR054C   |              |              |              |
| YHR054W-A |              |              |              |
| YHR055C   |              |              |              |
| YHR056C   |              |              |              |
| YHR056W-A |              |              |              |
| YHR057C   | 0.133088913  | 0.066400102  | 0.145825649  |
| YHR058C   | -2.456490829 | -2.963590293 | -1.391390645 |
| YHR059W   | -0.708798552 | -0.796081385 | -0.404863782 |
| YHR060W   | 0.003382323  | -0.842795228 | 0.00484274   |
| YHR061C   | 0.179131035  | 0.471582057  | 0.165727396  |
| YHR062C   | 5.592514531  | 3.434575988  | 1.838023445  |
| YHR063C   |              |              |              |
| YHR063W-A |              |              |              |
| YHR064C   | -5.511440469 | -2.064238182 | -4.216704917 |
| YHR065C   | 2.066701982  | 1.499906886  | 1.658943495  |
| YHR066W   | 0.818446905  | 0.175222976  | 0.576477132  |
| YHR067W   | -2.756542608 | 0.056994536  | -2.126330334 |
| YHR068W   | 0.155722428  | -1.893167529 | 0.175312956  |
| YHR069C   | 5.955155601  | 6.580099169  | 1.517524601  |
| YHR069C-A |              |              |              |
| YHR070C-A |              |              |              |
| YHR070W   | 1.433260456  | 0.700038726  | 1.314443066  |
| YHR071C-A |              |              |              |
| YHR071W   |              |              |              |
| YHR072W   | 0.029872253  | -0.735510053 | 0.027290477  |
| YHR072W-A |              |              |              |
| YHR073C-B |              |              |              |
| YHR073W   | -2.312975052 | 0.435143592  | -1.790613908 |

|           |              |              |              |
|-----------|--------------|--------------|--------------|
| YHR073W-A |              |              |              |
| YHR074W   | 0.027960129  | -0.44115809  | 0.033168701  |
| YHR075C   | -1.166003976 | -2.686817023 | -1.010796028 |
| YHR076W   | -0.128616798 | -0.169491219 | -0.126735652 |
| YHR077C   | 0.970590002  | -0.05253614  | 1.023285209  |
| YHR078W   | 0.281416496  | 0.126947478  | 0.32719757   |
| YHR079C   | -0.814538637 | -0.00613026  | -0.939726481 |
| YHR079C-A |              |              |              |
| YHR079C-B | -0.026897966 | -0.027566583 | -0.03186339  |
| YHR080C   | 2.424079578  | -0.141542279 | 2.11485331   |
| YHR081W   | -1.288426507 | -0.025426062 | -0.868350606 |
| YHR082C   | -0.010583765 | -0.012482181 | -0.0126657   |
| YHR083W   | -0.003480211 | -0.021878034 | -0.003247376 |
| YHR084W   | 0.962076235  | -0.335585994 | 1.141225513  |
| YHR085W   | 0.648719694  | -0.001977645 | 0.659203189  |
| YHR086W   | 8.520366986  | 4.159707079  | 4.726393287  |
| YHR086W-A |              |              |              |
| YHR087W   | 0.023915058  | 0.249878332  | 0.027122897  |
| YHR088W   |              |              |              |
| YHR089C   |              |              |              |
| YHR090C   |              |              |              |
| YHR091C   | -0.005122501 | 0.53125146   | -0.005255096 |
| YHR092C   | -3.62974977  | -2.769691052 | -3.026052546 |
| YHR093W   | -0.009133215 | -1.509084454 | -0.011246849 |
| YHR094C   | -0.040373861 | -0.02660013  | -0.054329067 |
| YHR095W   | 0.446026941  | -0.078275394 | 0.432770088  |
| YHR096C   | -0.052092563 | 0.500210608  | -0.069741256 |
| YHR097C   | 0.049463607  | 0.177080998  | 0.052916002  |
| YHR098C   |              |              |              |
| YHR099W   |              |              |              |
| YHR100C   | -0.000128488 | 0.045459357  | -0.000150817 |
| YHR101C   | 1.376735746  | 0.108354389  | 1.503033691  |
| YHR102W   |              |              |              |
| YHR103W   | 10.41076616  | 1.291828437  | 5.709982185  |
| YHR104W   | 0.03237701   | -0.814813985 | 0.035986203  |
| YHR105W   | -0.012846174 | -0.086582333 | -0.011557708 |
| YHR106W   | 0.474788893  | -0.026848687 | 0.294348622  |
| YHR107C   | -2.637274183 | -2.348928909 | -1.326896523 |
| YHR108W   | 1.543170675  | 0.486003958  | 2.145450562  |
| YHR109W   | -0.178899211 | -0.39338027  | -0.256031908 |
| YHR110W   | -0.350052331 | 0.229847367  | -0.409790436 |
| YHR111W   | -0.000174256 | -0.143359259 | -0.000277787 |
| YHR112C   | 0.081477061  | -0.0661813   | 0.136741216  |
| YHR113W   | -0.004170522 | 0.170637077  | -0.005785623 |
| YHR114W   | -0.104290357 | -0.212500528 | -0.130661033 |
| YHR115C   | -0.80091394  | -0.12856672  | -0.830885365 |
| YHR116W   | 0.354195487  | 1.031609319  | 0.45014062   |
| YHR117W   | -0.135957962 | 0.101237968  | -0.194398612 |
| YHR118C   | 0.084219588  | 0.107371978  | 0.091425533  |
| YHR119W   |              |              |              |
| YHR120W   | -0.02292785  | -0.246636252 | -0.040870151 |
| YHR121W   | -1.32002638  | -0.933530011 | -2.050160732 |
| YHR122W   | 0.086400329  | 1.51917055   | 0.130633812  |



|           |              |              |              |
|-----------|--------------|--------------|--------------|
| YHR123W   | 0.04176791   | 0.055590883  | 0.060289837  |
| YHR124W   | 0.009012801  | -0.016321386 | 0.009762265  |
| YHR125W   | 0.004725923  | -0.178113175 | 0.005928376  |
| YHR126C   | -0.00479217  | -0.002804491 | -0.006912582 |
| YHR127W   | -0.060233162 | -1.532718694 | -0.064137968 |
| YHR128W   |              |              |              |
| YHR129C   | -0.178009854 | 0.046123203  | -0.219274137 |
| YHR130C   | -0.023219649 | -0.028343695 | -0.032577265 |
| YHR131C   | 0.448138053  | -0.029817362 | 0.511767323  |
| YHR131W-A |              |              |              |
| YHR132C   | 0.230666114  | 0.948317006  | 0.199637908  |
| YHR132W-A | -0.23139868  | -0.005963002 | -0.188380786 |
| YHR133C   | 0.010924741  | 1.302324325  | 0.012337764  |
| YHR134W   | 0.002247572  | -1.00856424  | 0.003736861  |
| YHR135C   | 0.007159506  | -0.580462559 | 0.009598259  |
| YHR136C   | -0.369902268 | -0.637690117 | -0.378065584 |
| YHR137C-A |              |              |              |
| YHR137W   | -0.952880807 | -0.569546614 | -1.044363169 |
| YHR138C   | -0.072982047 | 0.071378425  | -0.097858273 |
| YHR139C   | -0.173176684 | 0.0065293    | -0.186063059 |
| YHR139C-A | 3.224666023  | 3.118100592  | 2.019305877  |
| YHR140W   | 2.640565203  | 1.910560448  | 2.229964723  |
| YHR141C   |              |              |              |
| YHR142W   | 0.023446346  | 0.081621311  | 0.027545861  |
| YHR143W   | -0.157761297 | 0.010277022  | -0.166728799 |
| YHR143W-A | -1.664855766 | -0.581135735 | -0.325946043 |
| YHR144C   |              |              |              |
| YHR145C   |              |              |              |
| YHR146W   | -0.097304763 | 0.35661915   | -0.061159269 |
| YHR147C   | 0.096478708  | -0.391678303 | 0.086722651  |
| YHR148W   | 3.008226919  | 2.079071121  | 2.022491336  |
| YHR149C   |              |              |              |
| YHR150W   | -0.056431657 | 0.036067102  | -0.044835037 |
| YHR151C   | -0.059960946 | -0.192433525 | -0.056404445 |
| YHR152W   | -0.827082117 | -0.057205316 | -0.881546631 |
| YHR153C   | 0.711669152  | -0.895492408 | 0.777717253  |
| YHR154W   | -0.74224534  | -0.34866534  | -0.833861407 |
| YHR155W   | -0.397703537 | -0.045677883 | -0.572267763 |
| YHR156C   | -10.42208998 | -8.964959603 | -4.706848956 |
| YHR157W   | 0.086297075  | -0.037950177 | 0.106189309  |
| YHR158C   | -0.273057127 | -0.041769809 | -0.313807645 |
| YHR159W   | 0.031729912  | -0.728330674 | 0.037886573  |
| YHR160C   | -0.034044495 | -0.033486686 | -0.033569572 |
| YHR161C   | -0.160379033 | -0.347584698 | -0.191135687 |
| YHR162W   | -0.097147689 | 0.01664562   | -0.11213028  |
| YHR163W   | -0.009478681 | 0.497634327  | -0.00968328  |
| YHR164C   | 0.004055528  | 0.274731549  | 0.006806728  |
| YHR165C   |              |              |              |
| YHR165W-A |              |              |              |
| YHR166C   | 1.646058731  | 0.127133777  | 1.152313161  |
| YHR167W   | 0.305552033  | 0.015672636  | 0.407838796  |
| YHR168W   | 1.912672093  | 5.096846612  | 0.57429586   |
| YHR169W   |              |              |              |

|           |              |              |              |
|-----------|--------------|--------------|--------------|
| YHR170W   | 1.791133452  | 3.010362817  | 0.835403709  |
| YHR171W   | -0.096626228 | -0.255538295 | -0.090015574 |
| YHR172W   | -1.878538243 | -2.076337704 | -1.125801978 |
| YHR173C   |              |              |              |
| YHR174W   |              |              |              |
| YHR175W   |              |              |              |
| YHR175W-A |              |              |              |
| YHR176W   | 1.186207686  | 0.278408247  | 1.157875998  |
| YHR177W   | 0.351948084  | -0.142738794 | 0.425553494  |
| YHR178W   | 2.154114386  | 1.378411403  | 1.371122522  |
| YHR179W   | 0.026645327  | 0.530704712  | 0.019580475  |
| YHR180C-B |              |              |              |
| YHR180W   | -0.539825908 | -0.021228266 | -0.628564369 |
| YHR180W-A |              |              |              |
| YHR181W   | 0.968377306  | -0.563158809 | 0.769843926  |
| YHR182C-A |              |              |              |
| YHR182W   | 0.983184052  | 0.051081208  | 1.014362126  |
| YHR183W   | 0.016545787  | 0.038647139  | 0.015451222  |
| YHR184W   | -0.0684674   | 0.185131128  | -0.057601007 |
| YHR185C   | 0.013357796  | 0.024112185  | 0.012889503  |
| YHR186C   | 0.375831358  | -0.212242657 | 0.37567508   |
| YHR187W   |              |              |              |
| YHR188C   | 0.778840578  | -0.014294707 | 0.703683902  |
| YHR189W   | -0.051439255 | -2.106383052 | -0.040556776 |
| YHR190W   | 0.035882175  | -2.003131668 | 0.037473892  |
| YHR191C   | -0.034564124 | 0.107360899  | -0.035777875 |
| YHR192W   |              |              |              |
| YHR193C   | 0.324484725  | 0.285468593  | 0.303294474  |
| YHR193C-A |              |              |              |
| YHR194W   | 0.621533356  | -0.198725907 | 0.763597511  |
| YHR195W   | 0.026158673  | 0.163104903  | 0.028886487  |
| YHR196W   | 1.997167065  | -0.042957647 | 1.181969162  |
| YHR197W   |              |              |              |
| YHR198C   | 0.966042046  | 0.92735528   | 1.056673058  |
| YHR199C   | 0.482899041  | 0.114021986  | 0.674406454  |
| YHR199C-A |              |              |              |
| YHR200W   | 1.650868272  | 0.558465877  | 1.434039359  |
| YHR201C   |              |              |              |
| YHR202W   | -0.231913814 | 0.050317329  | -0.271625797 |
| YHR203C   | 4.104770682  | 0.042852008  | 2.452081594  |
| YHR204W   | -0.010423794 | -0.138631514 | -0.011707776 |
| YHR205W   |              |              |              |
| YHR206W   | 2.689347241  | 0.199475367  | 2.692985733  |
| YHR207C   | 2.093844029  | 0.848333752  | 2.041243824  |
| YHR208W   |              |              |              |
| YHR209W   | -0.053738879 | 0.792062734  | -0.072122674 |
| YHR210C   | 0.931918826  | -0.005013447 | 1.057529787  |
| YHR211W   |              |              |              |
| YHR212C   |              |              |              |
| YHR212W-A |              |              |              |
| YHR213W   |              |              |              |
| YHR213W-A |              |              |              |
| YHR213W-B |              |              |              |

|           |              |              |              |
|-----------|--------------|--------------|--------------|
| YHR214C-D |              |              |              |
| YHR214C-E |              |              |              |
| YHR214W   |              |              |              |
| YHR214W-A |              |              |              |
| YHR215W   |              |              |              |
| YHR216W   |              |              |              |
| YHR217C   |              |              |              |
| YHR218W   |              |              |              |
| YHR218W-A |              |              |              |
| YHR219C-A |              |              |              |
| YHR219W   |              |              |              |
| YIL001W   |              | 1.321955433  |              |
| YIL002C   | -0.065279727 | 0.912712122  | -0.085167594 |
| YIL002W-A |              |              |              |
| YIL003W   | -0.986863628 | 0.47707314   | -0.895346048 |
| YIL004C   | -1.10223898  | -0.062728654 | -1.381153298 |
| YIL005W   | -1.437354662 | 1.766593996  | -1.078778688 |
| YIL006W   | -0.767101802 | 0.623993583  | -0.390875037 |
| YIL007C   | 0.701414186  | 0.092737858  | 0.717434009  |
| YIL008W   | -0.508766635 | 0.663171142  | -0.461314864 |
| YIL009C-A | 0.061749688  | 0.3264995    | 0.055871471  |
| YIL009W   | -1.229341433 | -0.041875493 | -1.314224032 |
| YIL010W   | 0.021299354  | -1.678389253 | 0.026985724  |
| YIL011W   | -2.451900312 | 0.143206513  | -1.984239857 |
| YIL012W   | -1.475203084 | -0.115502341 | -1.488457116 |
| YIL013C   | 0.654389814  | 0.215419439  | 0.904371958  |
| YIL014C-A |              |              |              |
| YIL014W   | -0.129646502 | -0.037992993 | -0.148454329 |
| YIL015C-A | -0.453826176 | 0.925784591  | -0.387050699 |
| YIL015W   | -0.043747194 | 0.152827259  | -0.04479219  |
| YIL016W   | -8.271049549 | 2.379494609  | -1.290334411 |
| YIL017C   | -0.840334112 | 0.334575836  | -0.950713357 |
| YIL018W   | 0.120055435  | 3.233901407  | 0.050998013  |
| YIL019W   | -0.341208355 | 0.060985937  | -0.248270533 |
| YIL020C   | -0.018578764 | 0.983212537  | -0.016794164 |
| YIL020C-A |              |              |              |
| YIL021C-A |              |              |              |
| YIL021W   | 3.494105318  | 8.886001543  | 0.621813904  |
| YIL022W   | -2.186197035 | 0.678409456  | -2.090169599 |
| YIL023C   | -1.650527215 | 0.391700718  | -1.488811796 |
| YIL024C   | -0.560135317 | -0.691306681 | -0.626548272 |
| YIL025C   | -0.062257624 | -0.269127978 | -0.074643323 |
| YIL026C   | -0.326469021 | -1.542942803 | -0.281172104 |
| YIL027C   | -1.3181937   | -0.106105295 | -1.124105773 |
| YIL028W   | -0.200053179 | -0.048253149 | -0.147879542 |
| YIL029C   | -0.826026136 | 0.160825694  | -1.124486551 |
| YIL029W-A |              |              |              |
| YIL030C   | -0.789339279 | -0.017624567 | -1.134402572 |
| YIL030W-A |              |              |              |
| YIL031W   | -0.346098778 | -0.00313697  | -0.222540123 |
| YIL032C   | -0.704666538 | 0.079741678  | -0.66559342  |
| YIL033C   | 0.535787636  | 4.598105365  | 0.20979958   |
| YIL034C   | -1.784981014 | -0.012023629 | -1.572386802 |

|           |              |              |              |
|-----------|--------------|--------------|--------------|
| YIL035C   | -1.94038746  | -0.107416327 | -1.393944032 |
| YIL036W   | -1.326100249 | -0.028163798 | -1.059762557 |
| YIL037C   | -1.585343427 | 0.261832233  | -1.345831846 |
| YIL038C   | 1.153964754  | -0.16172205  | 0.76890229   |
| YIL039W   | -0.797164538 | -0.04923206  | -0.529410811 |
| YIL040W   | -0.61915214  | 0.09660429   | -0.510784162 |
| YIL041W   |              |              |              |
| YIL042C   | -0.390840813 | 1.766205553  | -0.358818628 |
| YIL043C   | -1.340456691 | 0.014938812  | -1.081485169 |
| YIL044C   | 0.48946303   | 1.287442565  | 0.493122967  |
| YIL045W   | -0.408099897 | 0.000994691  | -0.31536868  |
| YIL046W   | -0.344504869 |              | -0.032830242 |
| YIL046W-A |              |              |              |
| YIL047C   | -2.865203964 | -0.080895726 | -2.312241678 |
| YIL047C-A |              |              |              |
| YIL048W   | -8.269573093 | -0.795499316 | -1.049533491 |
| YIL049W   | 0.047222705  | 0.192522095  | 0.054223376  |
| YIL050W   | 0.11778605   | 0.780186542  | 0.128706598  |
| YIL051C   | -4.191421307 | -0.136357793 | -1.721463556 |
| YIL052C   | -7.923686114 | -1.196838847 | -3.257533546 |
| YIL053W   | -1.066918217 | 0.007470093  | -1.034333226 |
| YIL054W   | 0.064374629  | 0.546583723  | 0.055485984  |
| YIL055C   | -0.299307057 | 0.276768594  | -0.181817954 |
| YIL056W   | 1.047297477  | 0.114198562  | 1.302469819  |
| YIL057C   | -1.433573638 | 0.125182337  | -0.920594362 |
| YIL058W   | -0.066848878 | 0.03046819   | -0.052892714 |
| YIL059C   | 0.075320858  | -0.098671581 | 0.094892725  |
| YIL060W   | 0.00436309   | -1.957234218 | 0.00566044   |
| YIL061C   | -1.0749481   | 0.223349925  | -0.813349113 |
| YIL062C   | -0.253698572 | -1.443088258 | -0.207639246 |
| YIL063C   | 0.09022679   | 1.145999721  | 0.091200591  |
| YIL064W   | -2.871750842 | -1.881002816 | -1.559576258 |
| YIL065C   | -0.426739022 | -0.020303573 | -0.250131454 |
| YIL066C   | -0.010913121 | -0.00476011  | -0.014331861 |
| YIL066W-A |              |              |              |
| YIL067C   | 0.110224103  | 0.094868269  | 0.141398121  |
| YIL068C   | 1.884453115  | 1.629275811  | 2.181446898  |
| YIL068W-A |              |              |              |
| YIL069C   | -0.336641166 | 1.223340078  | -0.256704625 |
| YIL070C   | 1.150278972  | 0.687262699  | 1.332133687  |
| YIL071C   | -0.352649686 | -0.331298106 | -0.312797428 |
| YIL071W-A |              |              |              |
| YIL072W   | 0.02259488   | -0.088715046 | 0.028993193  |
| YIL073C   | -3.404446904 | -1.872601603 | -2.455168233 |
| YIL074C   | -0.109892442 | -0.045416014 | -0.129287135 |
| YIL075C   | 6.270183951  | 5.151103466  | 5.105506784  |
| YIL076W   | 5.221677565  | 0.117498653  | 3.471982719  |
| YIL077C   | -3.52890576  | -2.546041509 | -2.226744434 |
| YIL078W   | -3.620220068 | -0.814006659 | -3.355902729 |
| YIL079C   | 3.767401421  | 3.678353704  | 2.064056687  |
| YIL082W   |              |              |              |
| YIL083C   | 0.068356948  | 1.267551739  | 0.08984294   |
| YIL084C   | -6.678196962 | 0.036831813  | -5.258401716 |

|           |              |              |              |
|-----------|--------------|--------------|--------------|
| YIL085C   | -0.792688873 | 0.938869824  | -0.921154181 |
| YIL086C   | -1.244355395 | -0.46523857  | -1.029157083 |
| YIL087C   | -16.82420039 | -19.60730788 | -5.483564623 |
| YIL088C   | 0.007267428  | -0.004711526 | 0.007494454  |
| YIL089W   | 0.006977099  | -0.24363345  | 0.006646949  |
| YIL090W   | 1.444136441  | 0.098701406  | 1.453434896  |
| YIL091C   | 0.347384027  | 0.128052208  | 0.348100172  |
| YIL092W   | -0.079419053 | 0.360135784  | -0.110341894 |
| YIL093C   | 0.011418673  | -0.006328094 | 0.012110901  |
| YIL094C   | -1.650603681 | 0.053087253  | -1.169310858 |
| YIL095W   | -2.664136886 | 0.209397635  | -1.935903643 |
| YIL096C   | -2.530654688 | 0.045219834  | -1.940407477 |
| YIL097W   | -1.432643397 | -0.002223267 | -1.070372397 |
| YIL098C   | 0.067547485  | 0.980667365  | 0.062239593  |
| YIL099W   | -0.042197241 | -0.036254723 | -0.054027265 |
| YIL100C-A |              |              |              |
| YIL100W   | -1.123500157 | -0.192880544 | -1.14940278  |
| YIL101C   | -2.407237425 | 0.260875282  | -2.179092205 |
| YIL102C   | -0.387684306 | -0.01251494  | -0.494852153 |
| YIL102C-A |              |              |              |
| YIL103W   | -1.560479856 | 0.016643704  | -1.473857515 |
| YIL104C   | -0.060291242 | 0.01431056   | -0.057760695 |
| YIL105C   | -2.430532523 | -0.508924692 | -1.046246287 |
| YIL105W-A |              |              |              |
| YIL106W   | 0.004180604  | -0.793295416 | 0.004835931  |
| YIL107C   | -2.819889232 | -0.099879886 | -1.438722905 |
| YIL108W   | -0.191593829 | 1.109389047  | -0.166136068 |
| YIL109C   | 6.595519868  | 3.823238036  | 3.748253658  |
| YIL110W   | -5.853069818 | -3.02006056  | -2.572187714 |
| YIL111W   | -1.162285497 | 0.285052522  | -0.846645351 |
| YIL112W   | 0.019870389  | 0.057576602  | 0.018302742  |
| YIL113W   | -2.535125252 | 1.005843009  | -1.707985133 |
| YIL114C   | -1.223724312 | 0.675481493  | -1.026544387 |
| YIL115C   | -0.009693849 | 0.090023092  | -0.010403596 |
| YIL115W-A |              |              |              |
| YIL116W   | -0.435170633 | 0.666086756  | -0.543167499 |
| YIL117C   | -2.527997472 | 1.478042535  | -1.500130464 |
| YIL118W   | 1.218757954  | 0.256719364  | 0.914797035  |
| YIL119C   | 0.731989238  | 2.193025883  | 0.687486283  |
| YIL120W   | -0.866262737 | -0.116426121 | -0.707104931 |
| YIL121W   | -2.991162813 | 0.004017191  | -2.711623694 |
| YIL122W   | -0.864412566 | 0.005854525  | -0.920591408 |
| YIL123W   | -1.000247327 | -0.01654163  | -0.820813104 |
| YIL124W   | -2.169710138 | 0.304725709  | -1.48890437  |
| YIL125W   | -0.192254    | -0.272893809 | -0.182283367 |
| YIL126W   | 4.778723134  | -0.22474647  | 3.153738443  |
| YIL127C   |              |              |              |
| YIL128W   | 0.01555189   | 0.000237494  | 0.014250092  |
| YIL129C   | -0.395712049 | -0.026636222 | -0.37419515  |
| YIL130W   | 0.553514281  | -0.065022849 | 0.656186028  |
| YIL131C   | -1.838439453 | -0.182610529 | -1.658278425 |
| YIL132C   | 0.052055939  | 0.04619879   | 0.051326135  |
| YIL133C   | 0.004049861  | -0.028979586 | 0.003959764  |

|           |              |              |              |
|-----------|--------------|--------------|--------------|
| YIL134C-A |              |              |              |
| YIL134W   | -0.057026277 | 0.256043985  | -0.05284121  |
| YIL135C   | -0.992079991 | 0.118152089  | -0.879995752 |
| YIL136W   | -2.593521455 | -0.004891001 | -1.758571644 |
| YIL137C   | -2.496480783 | 0.270817734  | -1.945431054 |
| YIL138C   | 0.048056954  | 0.065676003  | 0.051835319  |
| YIL139C   | -0.359290332 | -0.027906234 | -0.209725536 |
| YIL140W   | -0.373190607 | -0.086915053 | -0.417427453 |
| YIL141W   | -0.273749234 | -0.125696339 | -0.290303994 |
| YIL142C-A |              |              |              |
| YIL142W   | -0.272004029 | -0.042453491 | -0.087694556 |
| YIL143C   | -0.02109398  | 0.871596008  | -0.016364445 |
| YIL144W   | -1.328707547 | 0.143719765  | -1.262613485 |
| YIL145C   | -0.425998791 | -0.165173835 | -0.442535594 |
| YIL146C   | 0.230626073  | 0.028613705  | 0.300428963  |
| YIL147C   | -0.148451883 | 0.047226453  | -0.109653773 |
| YIL148W   | 4.427552981  | 7.344295426  | 1.540896604  |
| YIL149C   | -1.003477727 | -0.052800486 | -0.859024654 |
| YIL150C   | -0.017520851 | 0.307270944  | -0.010644096 |
| YIL151C   |              |              |              |
| YIL152W   | 5.499303168  | 1.81713072   | 3.680547999  |
| YIL153W   | -2.669427177 | -0.189523153 | -2.166716936 |
| YIL154C   | -1.938465311 | -0.473722337 | -2.091925522 |
| YIL155C   | -0.019673245 | -0.451566045 | -0.026796831 |
| YIL156W   | -2.883358286 | -0.51010999  | -1.835075437 |
| YIL156W-A |              |              |              |
| YIL156W-B |              |              |              |
| YIL157C   | -0.319722589 | -0.230016793 | -0.402518075 |
| YIL158W   |              |              |              |
| YIL159W   | -0.027848234 | -0.003407458 | -0.029202952 |
| YIL160C   | -1.635767525 | 0.000472153  | -1.326805637 |
| YIL161W   | -1.659763252 | 0.190226582  | -1.434722178 |
| YIL162W   | 0.002906488  | -0.335671515 | 0.0027946    |
| YIL163C   | -0.095661656 | -0.108246813 | -0.11996161  |
| YIL164C   | -0.360513271 | -0.199595445 | -0.313026214 |
| YIL165C   | -0.802776464 | 0.056483473  | -0.748206353 |
| YIL166C   | -0.00108017  | -0.001798282 | -0.001090736 |
| YIL167W   | -0.946211743 | -0.001073774 | -0.749768503 |
| YIL168W   | -0.200954889 | 0.190214166  | -0.249077125 |
| YIL169C   |              |              |              |
| YIL170W   | -32.42656736 | -10.28707884 | -4.715613991 |
| YIL171W   | -0.391412302 | -0.038480051 | -0.27748663  |
| YIL171W-A |              |              |              |
| YIL172C   |              |              |              |
| YIL173W   | -0.064941466 | -0.372949572 | -0.041139544 |
| YIL176C   |              |              |              |
| YIL177C   |              |              |              |
| YIL177W-A |              |              |              |
| YIR001C   | 0.125417537  | -0.020771551 | 0.080220076  |
| YIR002C   | 0.443592677  | 0.069152485  | 0.40549303   |
| YIR003W   | -0.508491362 | 1.349655833  | -0.289062083 |
| YIR004W   | -2.206754037 | 0.082546755  | -1.93013251  |
| YIR005W   | -1.425360572 | -0.030673768 | -1.302177972 |

|           |              |              |              |
|-----------|--------------|--------------|--------------|
| YIR006C   | -0.085188438 | 0.043398842  | -0.092469735 |
| YIR007W   | -2.888092936 | -0.105731219 | -2.086135151 |
| YIR008C   | -0.735953643 | -0.043762566 | -0.585183147 |
| YIR009W   | -0.171748778 | 0.025043433  | -0.160431295 |
| YIR010W   | -0.642677831 | -0.223357286 | -0.563903598 |
| YIR011C   | 1.730845973  | 0.028900118  | 1.391804398  |
| YIR012W   | -2.142116902 | 0.033494215  | -1.72255643  |
| YIR013C   | -0.499225995 | -0.271613473 | -0.521354868 |
| YIR014W   | 0.065432868  | 1.762650098  | 0.065187953  |
| YIR015W   | -0.009697492 | 0.015934393  | -0.009374849 |
| YIR016W   | 0.024583381  | 0.06018797   | 0.027776435  |
| YIR017C   | -0.017170519 | -0.050419238 | -0.017919345 |
| YIR017W-A |              |              |              |
| YIR018C-A |              |              |              |
| YIR018W   | 0.003613859  | -0.105687387 | 0.004626811  |
| YIR019C   | -0.220792658 | 0.187419666  | -0.27161867  |
| YIR020C   | -0.025175229 | 0.049956299  | -0.028763471 |
| YIR020C-B |              |              |              |
| YIR020W-A |              |              |              |
| YIR020W-B | -0.002279013 | 0.609870856  | -0.002457794 |
| YIR021W   | 0.046512327  | -0.000398665 | 0.071196904  |
| YIR021W-A |              |              |              |
| YIR022W   | -0.065962075 | -0.07704528  | -0.052889603 |
| YIR023C-A |              |              |              |
| YIR023W   | 0.058607259  | -0.044679754 | 0.058048517  |
| YIR024C   | 0.765612071  | 0.040759971  | 0.674937051  |
| YIR025W   | 1.147587303  | 0.780764841  | 1.018780773  |
| YIR026C   | 0.067882174  | 0.065171095  | 0.080184172  |
| YIR027C   | -0.061256406 | -0.315763475 | -0.062542113 |
| YIR028W   | 0.029759476  | -0.019376038 | 0.028214484  |
| YIR029W   | 0.430179631  | 0.618698905  | 0.592452707  |
| YIR030C   | 0.131886294  | 0.039151499  | 0.130407527  |
| YIR030W-A |              |              |              |
| YIR031C   | 0.269989637  | -1.616005524 | 0.215765236  |
| YIR032C   | -0.069910125 | -0.067237392 | -0.080883477 |
| YIR033W   | 0.165150935  | 0.001847185  | 0.173676661  |
| YIR034C   | 0.023817156  | -1.052621761 | 0.02739955   |
| YIR035C   | 0.004480524  | -0.117213197 | 0.005084187  |
| YIR036C   | -0.144534771 | 0.139244496  | -0.121770071 |
| YIR036W-A |              |              |              |
| YIR037W   | -0.109173955 | 0.272887731  | -0.105226164 |
| YIR038C   | 0.444804756  | -0.024243947 | 0.556892105  |
| YIR039C   | 0.027453999  | 0.531830626  | 0.02924628   |
| YIR040C   |              |              |              |
| YIR041W   |              |              |              |
| YIR042C   | -0.070977488 | 0.074587985  | -0.082894258 |
| YIR043C   | 1.076979761  | -0.029248824 | 1.075923107  |
| YIR044C   | 0.020268154  | -0.032922438 | 0.018981571  |
| YJL001W   | 7.122703075  | 2.873727683  | 4.263051503  |
| YJL002C   | 0.089361009  | 0.000576087  | 0.09160111   |
| YJL003W   | -0.193264779 | 1.194984331  | -0.168835117 |
| YJL004C   | -0.237529559 | -0.691171209 | -0.197144847 |
| YJL005W   | 5.871938369  | 2.397971156  | 5.142075786  |

|           |              |              |              |
|-----------|--------------|--------------|--------------|
| YJL006C   | 0.614438735  | 1.305671013  | 0.714566206  |
| YJL007C   | 0.636077954  | -0.419150554 | 0.739396126  |
| YJL008C   |              |              |              |
| YJL009W   | -2.145976221 | 0.054519225  | -1.128706432 |
| YJL010C   | -0.091586368 | -0.027987341 | -0.070081754 |
| YJL011C   | 4.868869396  | 3.068882193  | 2.884802749  |
| YJL012C   | -0.143466367 | -0.890471078 | -0.070122591 |
| YJL013C   | 0.290181292  | 0.009673448  | 0.333666442  |
| YJL014W   | 1.642012708  | -0.453209233 | 0.674153199  |
| YJL015C   | -0.718481607 | 0.029288426  | -0.576459638 |
| YJL016W   | -0.274974512 | -0.130834664 | -0.33291527  |
| YJL017W   | -3.054206    | -0.665159367 | -2.038584339 |
| YJL018W   | -0.02393775  | 0.300614312  | -0.026978624 |
| YJL019W   | 0.194800118  | 0.049293866  | 0.243351855  |
| YJL020C   | -2.012459272 | 0.032805925  | -2.009693384 |
| YJL020W-A |              |              |              |
| YJL021C   | 0.441715434  | -0.235114513 | 0.654458188  |
| YJL022W   | -0.241142189 | -0.035245869 | -0.302125443 |
| YJL023C   | 0.691427809  | 0.106351977  | 0.865132612  |
| YJL024C   | -0.661747804 | 0.050198726  | -0.628277647 |
| YJL025W   | -0.070035908 | -1.14024296  | -0.063709324 |
| YJL026C-A |              |              |              |
| YJL026W   | -0.021020634 | 0.172518781  | -0.018736685 |
| YJL027C   | -1.016979086 | 0.004314727  | -0.985373636 |
| YJL028W   | -0.110265959 | -0.137402371 | -0.111840399 |
| YJL029C   | 0.001239225  | -0.030357606 | 0.001703636  |
| YJL030W   | -2.748396533 | -0.868079534 | -2.161514412 |
| YJL031C   | 0.086835621  | 0.011490746  | 0.098974654  |
| YJL032W   | -0.012312266 | -0.030057657 | -0.013229146 |
| YJL033W   | 0.054590187  | -0.024938455 | 0.051535721  |
| YJL034W   | -0.906769297 | 0.355179291  | -0.760449126 |
| YJL035C   | -0.010347828 | -0.249389276 | -0.010379551 |
| YJL036W   | 1.323066665  | 1.373106191  | 1.161580814  |
| YJL037W   | 0.044765518  | 0.260255024  | 0.069814252  |
| YJL038C   | -0.001787675 | 0.001794734  | -0.001883632 |
| YJL039C   | 0.324964339  | 0.101305002  | 0.242951272  |
| YJL041W   | 6.111341026  | 2.505821157  | 4.625090027  |
| YJL042W   | -0.061028697 | 0.006369669  | -0.057865222 |
| YJL043W   | -0.13267708  | -0.024774252 | -0.100373952 |
| YJL044C   | 0.197999868  | 0.871572163  | 0.145243866  |
| YJL045W   | 0.156241956  | 0.013747684  | 0.167790498  |
| YJL046W   | -0.009609198 | -0.029085419 | -0.006933505 |
| YJL047C   | -2.646148339 | -0.309080744 | -2.235139922 |
| YJL047C-A |              |              |              |
| YJL048C   | -0.692697537 | -0.022718331 | -0.460938488 |
| YJL049W   | 0.035467786  | -0.610127277 | 0.026000161  |
| YJL050W   | 0.064689813  | 2.090418076  | 0.019809079  |
| YJL051W   | -0.23396987  | 0.044198659  | -0.275189219 |
| YJL052C-A |              |              |              |
| YJL052W   | -0.017141836 | 0.116000081  | -0.017444512 |
| YJL053W   | -0.292864801 | -3.098225152 | -0.258322214 |
| YJL054W   | -0.00492778  | -0.002275142 | -0.005395958 |
| YJL055W   | -0.223647019 | 1.870723694  | -0.199352494 |



|           |              |              |              |
|-----------|--------------|--------------|--------------|
| YJL056C   | 1.198257808  | -0.054652729 | 1.341484794  |
| YJL057C   | 0.000780781  | 0.000998416  | 0.000812644  |
| YJL058C   | -1.033580787 | -0.340384002 | -1.298936163 |
| YJL059W   |              |              |              |
| YJL060W   | 0.955253338  | 1.01118422   | 1.013308461  |
| YJL061W   | 0.154505003  | -0.29083525  | 0.137043208  |
| YJL062W   | 0.311365497  | 0.12480774   | 0.257562211  |
| YJL062W-A |              |              |              |
| YJL063C   | 0.030658387  | -0.123480097 | 0.040540196  |
| YJL064W   | -0.672087784 | -0.099344065 | -0.730011822 |
| YJL065C   | 1.055195898  | 0.554665285  | 1.178842624  |
| YJL066C   | -0.002488128 | -0.01017318  | -0.002831451 |
| YJL067W   | -0.14837585  | -0.652182612 | -0.18991118  |
| YJL068C   | -0.279107949 | -0.024008638 | -0.360092543 |
| YJL069C   | 4.107420475  | 2.858399837  | 1.700903363  |
| YJL070C   | -0.804203657 | -0.489503012 | -1.10556885  |
| YJL071W   | -1.368274719 | -0.496221636 | -1.158580559 |
| YJL072C   | -0.01489702  | 0.038866069  | -0.011508544 |
| YJL073W   | 0.007411783  | -1.985045916 | 0.007150865  |
| YJL074C   | -1.994399046 | 0.682725721  | -1.602767617 |
| YJL075C   | -0.109128236 | 0.090112549  | -0.105761164 |
| YJL076W   | -3.522907308 | -1.519192862 | -3.093134933 |
| YJL077C   | 0.09680164   | 0.018715873  | 0.114895291  |
| YJL077W-A |              |              |              |
| YJL077W-B |              |              |              |
| YJL078C   | -2.710880247 | -1.382561011 | -2.514780183 |
| YJL079C   | -0.018894005 | -0.216293187 | -0.022921723 |
| YJL080C   | -2.451003682 | -0.51180945  | -1.962393253 |
| YJL081C   | -1.743657306 | -0.385227137 | -0.609819199 |
| YJL082W   | -7.251341435 | -2.076628614 | -2.742120724 |
| YJL083W   | 0.002015449  | -1.625133075 | 0.001806496  |
| YJL084C   | 0.886878342  | -0.053480884 | 0.788651579  |
| YJL085W   | 2.085953406  | 1.509609658  | 1.328501983  |
| YJL086C   | 1.044440945  | -1.703386406 | 1.189580336  |
| YJL087C   | 0.620253878  | 0.139124988  | 0.593981843  |
| YJL088W   | 0.512027502  | -0.402809055 | 0.587547051  |
| YJL089W   |              |              |              |
| YJL090C   | -0.14502067  | -0.034820958 | -0.168134342 |
| YJL091C   | -0.028631831 | 0.043823762  | -0.036823144 |
| YJL092W   | 0.036373626  | 0.37790796   | 0.057587157  |
| YJL093C   | -0.09607512  | -0.056406562 | -0.088204009 |
| YJL094C   | -0.046133248 | -1.373371343 | -0.06142066  |
| YJL095W   | 0.01318428   | -0.01866664  | 0.015675604  |
| YJL096W   | 0.054614892  | -0.007440497 | 0.067757202  |
| YJL097W   | 0.032155018  | 0.049900189  | 0.032523928  |
| YJL098W   | -0.652730812 | -0.016924956 | -0.781296787 |
| YJL099W   | 0.809725059  | 2.029573977  | 0.61426128   |
| YJL100W   | 0.039108059  | 0.046393396  | 0.050880062  |
| YJL101C   | 0.034678098  | 0.038805169  | 0.043393642  |
| YJL102W   | 14.41305484  | 1.644760957  | 4.95195669   |
| YJL103C   | -0.988820486 | -1.155562733 | -1.150664936 |
| YJL104W   | -0.146724835 | -0.025969266 | -0.1564359   |
| YJL105W   | -0.057028312 | 0.02953492   | -0.067744134 |

|           |              |              |              |
|-----------|--------------|--------------|--------------|
| YJL106W   | -0.034258913 | -0.100861857 | -0.051098417 |
| YJL107C   | -0.586925132 | -0.623093257 | -0.75722093  |
| YJL108C   | -0.053605303 | 0.178699267  | -0.067384526 |
| YJL109C   | -0.607230403 | -0.06246887  | -0.702308302 |
| YJL110C   | -0.716089645 | -0.188368459 | -0.833980843 |
| YJL111W   | 3.011500015  | -0.075559921 | 1.279651938  |
| YJL112W   | 0.016998793  | -0.151493871 | 0.023200374  |
| YJL115W   | -0.029290657 | -0.075436274 | -0.025672193 |
| YJL116C   | 0.110483606  | 0.479517599  | 0.160740279  |
| YJL117W   | -0.063634141 | 0.510975453  | -0.072707142 |
| YJL118W   | 0.041052012  | 0.447817445  | 0.059324265  |
| YJL119C   | -0.152775907 | -1.402269628 | -0.237229893 |
| YJL120W   | -0.593899173 | -0.009982626 | -0.786234876 |
| YJL121C   | -0.171995469 | -0.002997559 | -0.231115252 |
| YJL122W   | 1.141713501  | 1.014332098  | 1.444437655  |
| YJL123C   | -0.690886049 | -1.460593488 | -0.835199386 |
| YJL124C   | -1.755342597 | -1.8539594   | -1.413848882 |
| YJL125C   | -0.130196193 | -0.692226128 | -0.128805859 |
| YJL126W   | 0.04407197   | 0.008697079  | 0.025434494  |
| YJL127C   | -0.15280906  | 0.235785576  | -0.22703229  |
| YJL127C-B |              |              |              |
| YJL127W-A |              |              |              |
| YJL128C   | -0.069953179 | -0.008772318 | -0.071075795 |
| YJL129C   | -1.209975259 | -0.874830152 | -1.611506026 |
| YJL130C   | -2.022169156 | -1.926829557 | -0.706393193 |
| YJL131C   | -0.057481214 | 0.05979929   | -0.061799361 |
| YJL132W   | -0.151720874 | -0.548903735 | -0.24392973  |
| YJL133C-A |              |              |              |
| YJL133W   | -0.013308976 | -1.105287349 | -0.012347742 |
| YJL134W   | -0.108779181 | -0.000511058 | -0.136740522 |
| YJL135W   | -0.159899028 | -0.015621942 | -0.155665429 |
| YJL136C   | 10.71086562  | 6.5216935    | 2.559928764  |
| YJL136W-A |              |              |              |
| YJL137C   | 0.626203019  | 0.031520678  | 0.816563467  |
| YJL138C   | 10.7159239   | 6.798741307  | 7.509782521  |
| YJL139C   | -0.000247163 | -2.641827001 | -0.00020581  |
| YJL140W   | -0.366832246 | 2.055855904  | -0.106246882 |
| YJL141C   | 0.612933988  | -0.152658619 | 0.736100646  |
| YJL142C   | 0.001656066  | -0.350010992 | 0.001939482  |
| YJL143W   | 0.477400927  | -0.157339513 | 0.691069655  |
| YJL144W   | -0.089714396 | -1.470948583 | -0.111016817 |
| YJL145W   | -0.212157262 | -2.113758932 | -0.210286746 |
| YJL146W   | -0.085239533 | 0.026123922  | -0.091572146 |
| YJL147C   | -0.014310634 | 0.02685457   | -0.0137964   |
| YJL148W   | -0.087630154 | -0.552497695 | -0.084798124 |
| YJL149W   | -0.887351126 | -1.570553226 | -0.789737208 |
| YJL150W   | -0.387174996 | -0.433488861 | -0.462662407 |
| YJL151C   | -0.115887521 | 0.80239731   | -0.124060623 |
| YJL152W   | -0.326262797 | -1.258970675 | -0.32792305  |
| YJL153C   | -0.015391547 | -2.076790638 | -0.0164902   |
| YJL154C   | -2.284089413 | -2.629652606 | -1.964958461 |
| YJL155C   | -0.034027914 | 0.809628008  | -0.053787257 |
| YJL156C   | -0.043858784 | 0.048763634  | -0.057007245 |

|           |              |              |              |
|-----------|--------------|--------------|--------------|
| YJL156W-A |              |              |              |
| YJL157C   | 4.544610652  | 1.816638133  | 4.4853403    |
| YJL158C   | -0.233004859 | 0.016801117  | -0.29644386  |
| YJL159W   | 0.051141707  | -0.00294651  | 0.053658548  |
| YJL160C   | -0.003812998 | -0.086117039 | -0.007001578 |
| YJL161W   | -0.034453596 | -0.027767684 | -0.041768643 |
| YJL162C   | -1.154777806 | 0.996136724  | -1.175230572 |
| YJL163C   | 0.007630905  | -1.44202964  | 0.008424891  |
| YJL164C   | -0.144478259 | -0.02573868  | -0.109740226 |
| YJL165C   | -1.739259715 | 0.026818208  | -1.29707017  |
| YJL166W   | -0.513790303 | -0.696372264 | -0.064402379 |
| YJL167W   | 0.067747093  | -1.110286595 | 0.071239859  |
| YJL168C   | 1.030480439  | -0.202758322 | 0.9482449    |
| YJL169W   | -0.339284726 | 0.222470125  | -0.40880614  |
| YJL170C   | -0.266923356 | 0.061085014  | -0.302032121 |
| YJL171C   | 0.025974442  | 0.18807061   | 0.030960664  |
| YJL172W   | 0.004841774  | 0.137999563  | 0.00419858   |
| YJL173C   | -0.400271971 | -0.037263071 | -0.506985319 |
| YJL174W   | -0.728754913 | -1.409734359 | -0.562043185 |
| YJL175W   | -3.02993813  | -4.163352475 | -1.076939129 |
| YJL176C   | -6.55911236  | -2.496930926 | -2.54041891  |
| YJL177W   | 0.328963573  | 0.084604087  | 0.282262093  |
| YJL178C   | -0.314396914 | 0.004222361  | -0.34801353  |
| YJL179W   | -0.02608585  | -0.682148933 | -0.031662354 |
| YJL180C   | 0.041443998  | -0.069608248 | 0.043551591  |
| YJL181W   | 0.883791008  | -0.084232241 | 0.769793232  |
| YJL182C   | -9.569334444 | -6.179334768 | -6.060800335 |
| YJL183W   | 0.533566199  | -0.098486876 | 0.458940746  |
| YJL184W   | 0.216948754  | -0.066053787 | 0.347572526  |
| YJL185C   | -0.269594352 | 0.957911967  | -0.229905606 |
| YJL186W   | -0.23618124  | 0.06767791   | -0.244680351 |
| YJL187C   | -0.522518876 | -0.370547446 | -0.633142079 |
| YJL188C   | -0.011172133 | -0.625080197 | -0.003442871 |
| YJL189W   |              |              |              |
| YJL190C   | -0.154053557 | -0.033895331 | -0.173310204 |
| YJL191W   | 0.071908894  | -0.594166748 | 0.096888919  |
| YJL192C   | -1.457489478 | 1.337974154  | -1.34824079  |
| YJL193W   | 0.016223937  | 1.095968053  | 0.016011403  |
| YJL194W   | 0.269604765  | -1.406083831 | 0.200726273  |
| YJL195C   | -0.426862216 | -0.033603355 | -0.583182269 |
| YJL196C   | -0.039443311 | 0.021688673  | -0.050185299 |
| YJL197C-A |              |              |              |
| YJL197W   | 0.172666379  | -0.153662473 | 0.170944327  |
| YJL198W   | -1.211393459 | 0.158548263  | -1.193350462 |
| YJL199C   | 0.020506445  | 0.019048047  | 0.022959862  |
| YJL200C   | -0.632514692 | 0.139811776  | -0.708040791 |
| YJL201W   | -0.006944574 | -0.052482018 | -0.008741175 |
| YJL202C   | -0.007555269 | 0.513530963  | -0.011251728 |
| YJL203W   | -0.005294078 | -0.093251881 | -0.007209745 |
| YJL204C   | -0.032476622 | 0.013473824  | -0.032320166 |
| YJL205C   |              |              |              |
| YJL206C   | 0.011412642  | -0.111440266 | 0.012402494  |
| YJL206C-A | -0.11301306  | 0.037227835  | -0.124561119 |

|           |              |              |              |
|-----------|--------------|--------------|--------------|
| YJL207C   | -0.808944714 | 0.047846001  | -1.262102636 |
| YJL208C   | -0.603534412 | -1.768608451 | -0.856758803 |
| YJL209W   | -0.057487218 | -0.837816362 | -0.078987361 |
| YJL210W   | 0.291985783  | 0.945074023  | 0.341642067  |
| YJL211C   | 0.091748316  | -0.003880697 | 0.141703174  |
| YJL212C   | 1.710620091  | 0.08566293   | 1.88604635   |
| YJL213W   | -0.112919549 | -1.426052179 | -0.113030126 |
| YJL214W   | -1.042925613 | -1.916626001 | -0.928317433 |
| YJL215C   | 0.248658317  | -0.810290682 | 0.281018239  |
| YJL216C   | -0.022207051 | -0.048492169 | -0.026919539 |
| YJL217W   | 0.023177703  | 0.542371518  | 0.028690264  |
| YJL218W   | 0.098958071  | -2.611707849 | 0.092279609  |
| YJL219W   |              |              |              |
| YJL220W   |              |              |              |
| YJL221C   |              |              |              |
| YJL222W   |              |              |              |
| YJL222W-A |              |              |              |
| YJL222W-B |              |              |              |
| YJL223C   |              |              |              |
| YJL225C   |              |              |              |
| YJL225W-A |              |              |              |
| YJR001W   | 0.005203347  | 0.181432355  | 0.005865328  |
| YJR002W   | 1.58433954   | 0.121753768  | 1.213409995  |
| YJR003C   | -0.101963972 | 0.290765689  | -0.100619922 |
| YJR004C   | 0.052095923  | 0.318710037  | 0.045176709  |
| YJR005C-A |              |              |              |
| YJR005W   | -2.493551491 | 0.030615792  | -1.645659298 |
| YJR006W   | 0.143374821  | 1.145465742  | 0.115239472  |
| YJR007W   | -9.881328111 | -12.4685932  | -2.244823147 |
| YJR008W   | 0.057902102  | 0.370027091  | 0.067268021  |
| YJR009C   | 0.013987123  | 0.000724471  | 0.017201248  |
| YJR010C-A |              | -0.277178509 |              |
| YJR010W   | -0.146779758 | 0.890490555  | -0.096652307 |
| YJR011C   | 0.120863715  | -0.182689076 | 0.111946143  |
| YJR012C   | 0.036207428  | 0.062890384  | 0.04045429   |
| YJR013W   | -2.968628416 | 0.011183302  | -1.855906396 |
| YJR014W   | -0.089701542 | 0.162293561  | -0.109156007 |
| YJR015W   | 0.074972127  | 0.662340891  | 0.07108111   |
| YJR016C   | 0.001558145  | 0.424165761  | 0.001441919  |
| YJR017C   | -0.602904141 | -0.103969771 | -0.507492497 |
| YJR018W   | 4.772949597  | 0.212924766  | 3.536500162  |
| YJR019C   | 0.006311775  | 0.791361974  | 0.007319134  |
| YJR020W   | 0.055888575  | 0.02318748   | 0.057295937  |
| YJR021C   | 0.024206864  | 0.007327279  | 0.022645995  |
| YJR022W   | -0.356343522 | -0.280445674 | -0.299948428 |
| YJR023C   | -7.047820523 | -2.638943124 | -4.202366837 |
| YJR024C   | 0.010123371  | 0.521519459  | 0.009298169  |
| YJR025C   | -0.015557393 | 0.05117765   | -0.020114343 |
| YJR026W   | 0.077527689  | 0.030201584  | 0.07970516   |
| YJR030C   | -1.680471693 |              | -1.09656427  |
| YJR031C   | -2.314315514 | -0.030257544 | -2.004395328 |
| YJR032W   | 0.020133086  | 0.945418958  | 0.02240358   |
| YJR033C   | 0.149754602  | -0.047161741 | 0.218010005  |

|         |              |              |              |
|---------|--------------|--------------|--------------|
| YJR034W | 0.025223087  | -0.029286377 | 0.023844002  |
| YJR035W | 0.222716224  | 2.786555305  | 0.16359729   |
| YJR036C | 0.070039574  | -0.074906145 | 0.053742952  |
| YJR037W | -0.750492327 | 0.103707502  | -0.89413879  |
| YJR038C | -0.188271378 | -0.769364309 | -0.186467748 |
| YJR039W | -3.622331033 | -7.578570786 | -2.326514905 |
| YJR040W | -1.354323141 | -0.544237241 | -1.5026017   |
| YJR041C | -0.055307271 | 0.073173162  | -0.076344534 |
| YJR042W | 2.922232821  | 3.836930169  | 1.766229642  |
| YJR043C | 0.763134522  | 0.435354959  | 1.053602923  |
| YJR044C | -0.029951501 | 0.937733594  | -0.030644619 |
| YJR045C | 0.740450721  | 0.691386746  | 0.822045817  |
| YJR046W |              |              |              |
| YJR047C | -0.034939401 | 1.39652959   | -0.027781616 |
| YJR048W | -0.029829449 | 0.019888007  | -0.03343182  |
| YJR049C | 0.56429899   | 0.629332704  | 0.321715823  |
| YJR050W | -0.719668883 | -0.109937316 | -0.800862402 |
| YJR051W | 0.137722716  | -0.011953214 | 0.156275427  |
| YJR052W | -1.544103122 | 0.054637713  | -1.485549159 |
| YJR053W | -0.27610677  | -1.404593348 | -0.278836331 |
| YJR054W | -0.008168509 | -0.001522707 | -0.007582758 |
| YJR055W | -2.060854464 | -0.071948187 | -2.841447656 |
| YJR056C | -0.062274461 | -0.032752471 | -0.069594201 |
| YJR057W | 0.002185803  | -0.388190456 | 0.002417226  |
| YJR058C | 1.093973804  | 1.988979552  | 1.074647857  |
| YJR059W | 0.028228094  | -0.013120848 | 0.021278248  |
| YJR060W | 0.077939444  | -0.37918984  | 0.091134257  |
| YJR061W | 0.563695965  | 2.260521093  | 0.435544164  |
| YJR062C | -0.055262028 | 0.009389554  | -0.07209282  |
| YJR063W | 0.143037684  | -0.450092164 | 0.10335162   |
| YJR064W | -1.169972755 | -2.161098265 | -0.511369707 |
| YJR065C | -2.41592892  | -5.794167707 | -2.168102548 |
| YJR066W | -0.046046292 | 0.026282608  | -0.063682369 |
| YJR067C | -0.02051405  | -0.799653053 | -0.020853531 |
| YJR068W | -0.615070628 | 0.036371187  | -0.872024817 |
| YJR069C | -0.415854342 | -0.731459255 | -0.429668732 |
| YJR070C | 0.115705168  | 0.014734673  | 0.108682861  |
| YJR071W |              |              |              |
| YJR072C | 0.156567366  | 0.065039744  | 0.174527168  |
| YJR073C | 0.560643036  | 0.004363074  | 0.643583086  |
| YJR074W | -0.153892269 | 0.335907088  | -0.194948951 |
| YJR075W | 0.036037076  | 0.034075733  | 0.044688076  |
| YJR076C | 0.010353759  | 0.006463244  | 0.013124824  |
| YJR077C | -0.036245048 | -0.012442294 | -0.038947294 |
| YJR078W | 0.005427573  | 0.006748634  | 0.007015687  |
| YJR079W | 0.042625801  | -0.045639329 | 0.033868383  |
| YJR080C | -0.797016601 | -0.55684579  | -0.734789885 |
| YJR082C | 0.045183975  | -0.120069923 | 0.056314685  |
| YJR083C | 0.272457234  | -0.193233752 | 0.449971379  |
| YJR084W | 0.004256076  | 0.513864452  | 0.005773337  |
| YJR085C |              |              |              |
| YJR086W |              |              |              |
| YJR087W | -0.635940346 | 0.016679221  | -0.718588126 |

|           |              |              |              |
|-----------|--------------|--------------|--------------|
| YJR088C   | 0.076241268  | -0.293856119 | 0.073979783  |
| YJR089W   |              |              |              |
| YJR090C   | 0.070457542  | 0.14153352   | 0.084641336  |
| YJR091C   | 0.697218172  | 0.275848913  | 0.881909258  |
| YJR092W   | 0.02101701   | -0.153037962 | 0.02441156   |
| YJR093C   | 1.412489685  | -1.158935134 | 1.384886252  |
| YJR094C   | -0.076609235 | -0.481308234 | -0.099596983 |
| YJR094W-A | -0.858305755 | -0.021732468 | -1.296896242 |
| YJR095W   | 0.802915278  | 0.766716222  | 1.041095424  |
| YJR096W   | 1.087854525  | 1.677787823  | 0.987310463  |
| YJR097W   | -0.061562921 | -0.00232883  | -0.073668801 |
| YJR098C   | -0.048111587 | -0.051476603 | -0.069448341 |
| YJR099W   | -0.600951887 | -0.022898967 | -0.787454208 |
| YJR100C   | -0.223558177 | 0.529803855  | -0.264830247 |
| YJR101W   |              |              |              |
| YJR102C   | 0.641757751  | -0.566637598 | 0.747350326  |
| YJR103W   | -0.000704123 | 0.229281023  | -0.000679603 |
| YJR104C   | -0.584906    | 0.001609542  | -0.755547171 |
| YJR105W   | -0.036320297 | -0.065170565 | -0.022667658 |
| YJR106W   | -0.00080245  | 0.523673106  | -0.001096744 |
| YJR107W   | 1.453968918  | -0.005200864 | 1.179453993  |
| YJR108W   | -0.412394133 | 0.485839903  | -0.302969881 |
| YJR109C   | 0.261917517  | -0.736971273 | 0.295670137  |
| YJR110W   | 0.782678124  | 0.016400833  | 0.815902249  |
| YJR111C   | 0.027913018  | -0.016889713 | 0.029451312  |
| YJR112W   | -0.645727378 | 1.386715268  | -0.817474698 |
| YJR112W-A |              |              |              |
| YJR113C   | -2.134268499 | -0.159825499 | -2.071350658 |
| YJR114W   |              |              |              |
| YJR115W   | -0.275326148 | -0.501471931 | -0.279046177 |
| YJR116W   | 0.003606094  | 0.472739343  | 0.00417453   |
| YJR117W   | 0.456238584  | -0.327027467 | 0.585154241  |
| YJR118C   | -0.028341393 | 0.005480919  | -0.043353961 |
| YJR119C   | -0.211878915 | -0.328092663 | -0.251287418 |
| YJR120W   | 0.030316625  | -0.03740089  | 0.038526055  |
| YJR121W   | -0.00761898  | -0.028507391 | -0.009056694 |
| YJR122W   | -0.005120501 | 0.075461128  | -0.007243886 |
| YJR123W   | -0.339421111 | -5.720095591 | -0.092391543 |
| YJR124C   | 0.763495352  | 0.061099667  | 0.873212621  |
| YJR125C   | 0.009903499  | 0.007021432  | 0.012496435  |
| YJR126C   | -0.27005305  | -0.022946683 | -0.335390306 |
| YJR127C   | 3.802226599  | 1.19243927   | 3.569337208  |
| YJR128W   | 0.398615031  | 1.114050063  | 0.492409493  |
| YJR129C   | -0.069138493 | 0.019424637  | -0.107261457 |
| YJR130C   | 0.025684652  | 0.658464218  | 0.035446887  |
| YJR131W   | 0.095988613  | -0.135136269 | 0.125356042  |
| YJR132W   |              |              |              |
| YJR133W   | -0.434258731 | 0.163126905  | -0.551503411 |
| YJR134C   | 0.021111187  | -0.07177491  | 0.02548421   |
| YJR135C   | -0.00224288  | -0.0084436   | -0.002063055 |
| YJR135W-A |              |              |              |
| YJR136C   |              |              |              |
| YJR137C   | -0.055587757 | -1.511295597 | -0.077234133 |

|           |              |              |              |
|-----------|--------------|--------------|--------------|
| YJR138W   |              |              |              |
| YJR139C   | 0.025263942  | -0.157989082 | 0.033446906  |
| YJR140C   | -0.242459318 | 0.010335973  | -0.244969098 |
| YJR140W-A |              |              |              |
| YJR141W   | -0.041985873 | 0.002005143  | -0.046774534 |
| YJR142W   | 1.085329732  | 0.987755333  | 1.313576741  |
| YJR143C   |              |              |              |
| YJR144W   | -0.044327988 | 0.141958759  | -0.051960448 |
| YJR145C   | 1.823014341  | 0.072127725  | 0.998167785  |
| YJR146W   | 0.306963562  | 0.89486855   | 0.355637135  |
| YJR147W   | -0.03369529  | 0.055451826  | -0.0358045   |
| YJR148W   | -0.081630864 | 1.379336561  | -0.112517719 |
| YJR149W   | 0.034236064  | -0.374178077 | 0.031760117  |
| YJR150C   | -0.025702091 | -0.240608127 | -0.027126146 |
| YJR151C   |              |              |              |
| YJR151W-A |              |              |              |
| YJR152W   | -0.571011435 | -0.044060606 | -0.643986102 |
| YJR153W   | -0.368615939 | 0.279328589  | -0.286447425 |
| YJR154W   | 0.02456334   | 0.348884072  | 0.023575285  |
| YJR155W   |              |              |              |
| YJR156C   |              |              |              |
| YJR157W   |              |              |              |
| YJR158W   |              |              |              |
| YJR159W   |              |              |              |
| YJR160C   |              |              |              |
| YJR161C   |              |              |              |
| YJR162C   |              |              |              |
| YKL001C   | -0.744382886 | -0.010908175 | -0.889740867 |
| YKL002W   | -0.19150475  | 0.110842844  | -0.217780604 |
| YKL003C   | -1.3453301   | 0.019532344  | -1.102788174 |
| YKL004W   | -0.090670816 | 0.097495923  | -0.083945663 |
| YKL005C   | -0.062083738 | -0.040644315 | -0.087450542 |
| YKL006C-A | 0.039824177  | -0.029303197 | 0.043812036  |
| YKL006W   | -5.430241824 | -4.078033694 | -1.720498288 |
| YKL007W   | -0.011626736 | -0.125026904 | -0.009187287 |
| YKL008C   | 0.19192261   | 0.712992167  | 0.174892107  |
| YKL009W   | 7.259002723  | 5.616099742  | 2.630565107  |
| YKL010C   | -0.404768704 | -0.126014141 | -0.546442101 |
| YKL011C   | 0.503507928  | 1.046694062  | 0.478483796  |
| YKL012W   | 0.005935093  | -0.170305637 | 0.006014438  |
| YKL013C   | -0.32023638  | -3.850146959 | -0.209544717 |
| YKL014C   | -1.292598899 | -0.490829509 | -1.126072447 |
| YKL015W   | 0.406213987  | 0.04663664   | 0.496831365  |
| YKL016C   | -0.004592382 | -0.000284102 | -0.004638692 |
| YKL017C   | -0.020786867 | -0.102426247 | -0.032544031 |
| YKL018C-A |              |              |              |
| YKL018W   | -0.458581813 | -0.16662171  | -0.492623172 |
| YKL019W   | -0.096161733 | -0.00909267  | -0.077975364 |
| YKL020C   | -1.104409051 | -0.708103157 | -1.312763904 |
| YKL021C   | 4.714744927  | 0.105357857  | 2.834928808  |
| YKL022C   | 0.224561306  | -0.050506089 | 0.345494605  |
| YKL023C-A |              |              |              |
| YKL023W   | -9.306715272 | -5.607735142 | -4.591073882 |

|           |              |              |              |
|-----------|--------------|--------------|--------------|
| YKL024C   | 0.097723743  | -0.011189622 | 0.136636726  |
| YKL025C   | -1.018618028 | -0.520873915 | -0.877579366 |
| YKL026C   | 0.305688706  | -0.717461778 | 0.324409876  |
| YKL027W   | -0.012742408 | -0.033730835 | -0.012604462 |
| YKL028W   | -0.901149985 | -0.009700327 | -0.825530461 |
| YKL029C   | -0.06694508  | -0.073836758 | -0.088664022 |
| YKL030W   | 0.043290508  | -0.323310632 | 0.057987199  |
| YKL031W   | -0.619808011 | 0.379624106  | -0.642069964 |
| YKL032C   | 0.014980606  | 1.870555421  | 0.0143409    |
| YKL033W   | -1.641291067 | -0.006032244 | -1.412674503 |
| YKL033W-A | -0.678385073 | -1.008021232 | -0.808795568 |
| YKL034W   | 0.232861505  | 1.69727385   | 0.322545577  |
| YKL035W   | 0.245678257  | -0.634832313 | 0.304110969  |
| YKL036C   | 0.374616331  | -0.096210476 | 0.378123441  |
| YKL037W   | -0.32835431  | 0.034472471  | -0.254329496 |
| YKL038W   | 0.251398102  | -0.12785289  | 0.236785938  |
| YKL039W   | -0.106232126 | 0.023971421  | -0.108460059 |
| YKL040C   | -0.059592448 | -1.087073873 | -0.045595454 |
| YKL041W   | -0.007381931 | -0.082632854 | -0.006374855 |
| YKL042W   | 0.044201709  | -0.112012663 | 0.064120234  |
| YKL043W   | -1.014367392 | -0.511620094 | -1.024133441 |
| YKL044W   | -0.143476903 | -0.009951792 | -0.116764882 |
| YKL045W   | 0.153542313  | -0.271749831 | 0.181280718  |
| YKL046C   | -0.002200735 | -0.718142593 | -0.003020578 |
| YKL047W   | -0.091484765 | 0.173372938  | -0.117573553 |
| YKL048C   | -1.424573169 | -1.706002471 | -1.560704486 |
| YKL049C   | -0.568351176 | -0.074360588 | -0.654727577 |
| YKL050C   | -0.010013731 | 0.552814242  | -0.014931421 |
| YKL051W   | -0.157873649 | -0.315799106 | -0.221032138 |
| YKL052C   | 0.030100176  | -0.058687339 | 0.041826929  |
| YKL053C-A | 0.142041034  | -0.136220467 | 0.162213311  |
| YKL053W   | -0.011841455 | 0.400939967  | -0.018450715 |
| YKL054C   | 9.60060847   | 1.294600372  | 4.930780299  |
| YKL055C   | -0.917983201 | -1.895025166 | -0.716186915 |
| YKL056C   | 0.320270006  | 0.469566714  | 0.297977287  |
| YKL057C   | 14.01415088  | 2.235350083  | 2.71947069   |
| YKL058W   | -4.317927901 | 1.304085821  | -2.773736235 |
| YKL059C   | -0.98582941  | -2.816475609 | -0.686267872 |
| YKL060C   | 0.044025815  | 0.003428711  | 0.038329535  |
| YKL061W   | 0.528972329  | 1.457342789  | 0.635839024  |
| YKL062W   | 0.773510391  | 0.021062321  | 0.880417104  |
| YKL063C   | 0.216827874  | 0.067719619  | 0.334869647  |
| YKL064W   | -0.281337836 | -0.37494291  | -0.352435043 |
| YKL065C   |              |              |              |
| YKL065W-A |              |              |              |
| YKL066W   | -0.053393655 | -0.075126355 | -0.073227663 |
| YKL067W   | -0.612786913 | -0.581257346 | -0.727769034 |
| YKL068W   | -0.604108908 | -0.687344585 | -0.599423807 |
| YKL068W-A |              |              |              |
| YKL069W   | -0.966714592 | -0.379436286 | -0.921956703 |
| YKL070W   | 0.27193361   | 0.086706155  | 0.329514983  |
| YKL071W   | -0.035550033 | -0.198460408 | -0.042338954 |
| YKL072W   | -0.11228421  | -0.100503276 | -0.163001789 |



|           |              |              |              |
|-----------|--------------|--------------|--------------|
| YKL073W   | -0.275574147 | -0.166224113 | -0.137809234 |
| YKL074C   | -3.232830745 | -0.364724812 | -2.9556841   |
| YKL075C   | -0.08913889  | 0.089232024  | -0.087707246 |
| YKL076C   | -0.991067267 | -0.010444976 | -0.998483675 |
| YKL077W   | 0.064374203  | -1.730204721 | 0.07021877   |
| YKL078W   | -0.051880549 | 0.004585547  | -0.074450881 |
| YKL079W   | 0.4606951    | 0.004812228  | 0.567224077  |
| YKL080W   | -0.141522826 | -1.839688767 | -0.155741519 |
| YKL081W   | -0.296436603 | -0.054514616 | -0.355810139 |
| YKL082C   | -0.006780354 | 0.083192996  | -0.007178997 |
| YKL083W   | 0.850533851  | 0.042515121  | 0.703804047  |
| YKL084W   | -0.160305181 | -1.236007052 | -0.147999611 |
| YKL085W   | -0.000582242 | -1.012931901 | -0.000500766 |
| YKL086W   | 0.753826004  | 0.004041153  | 0.633660951  |
| YKL087C   | -0.369312966 | -0.359202495 | -0.336522086 |
| YKL088W   | -0.024053173 | -0.204751517 | -0.017496772 |
| YKL089W   | 0.125675963  | 1.089144586  | 0.127995458  |
| YKL090W   | 0.100247937  | 0.701736991  | 0.125694775  |
| YKL091C   | -0.681867489 | -0.093108675 | -0.789888594 |
| YKL092C   | 0.011050123  | -1.026118147 | 0.010637114  |
| YKL093W   | -0.183820516 | -0.861267126 | -0.223696524 |
| YKL094W   | -1.691017193 | -1.494438098 | -1.998313501 |
| YKL095W   | -0.136946037 | 0.505327088  | -0.135343729 |
| YKL096C-B |              |              |              |
| YKL096W   | -0.017004791 | 0.164104394  | -0.018527127 |
| YKL096W-A | 0.21034274   | 1.67021818   | 0.243595959  |
| YKL097C   | 0.012536126  | -0.146550997 | 0.01485276   |
| YKL098W   | -0.00855573  | 0.098733038  | -0.010670257 |
| YKL099C   | 0.254886079  | -0.059553402 | 0.272563352  |
| YKL100C   | 0.051139467  | -0.178491747 | 0.051800575  |
| YKL100W-A |              |              |              |
| YKL101W   | -1.034397818 | -0.000580779 | -0.884212058 |
| YKL102C   | -0.555962859 | 0.027590929  | -0.647293665 |
| YKL103C   | -0.027708675 | -0.035722312 | -0.033325198 |
| YKL104C   | -0.177257544 | 0.066103828  | -0.156723861 |
| YKL105C   | 0.000884824  | 0.051871696  | 0.001370319  |
| YKL106C-A |              |              |              |
| YKL106W   | -0.559826181 | -0.032355564 | -0.689737598 |
| YKL107W   | 0.033487207  | -0.075688901 | 0.040097228  |
| YKL108W   | 0.378238117  | 0.609963652  | 0.269535002  |
| YKL109W   | -0.378347984 | 0.033558713  | -0.238938037 |
| YKL110C   | -0.727677062 | -0.000399343 | -0.633878968 |
| YKL111C   | -7.139649093 | -4.87455491  | -4.636639981 |
| YKL112W   | -6.543509465 | -5.012736928 | -4.712712395 |
| YKL113C   | -0.054027303 | 1.132005551  | -0.060000459 |
| YKL114C   | -0.161005729 | 0.215410271  | -0.168985814 |
| YKL115C   | -1.882623522 | -0.050042752 | -1.956865254 |
| YKL116C   | -0.032718596 | 0.087934317  | -0.036782414 |
| YKL117W   | 0.009062654  | 0.375460972  | 0.011169268  |
| YKL118W   | -1.291720664 | -0.579374982 | -1.409878017 |
| YKL119C   | -0.238618415 | -0.051302422 | -0.288217728 |
| YKL120W   | 0.115701032  | -0.130732194 | 0.134340438  |
| YKL121W   | -0.036453286 | -0.026451595 | -0.035837284 |

|           |              |              |              |
|-----------|--------------|--------------|--------------|
| YKL122C   | 0.07249879   | -0.138703645 | 0.088981268  |
| YKL123W   | -0.229246861 | 0.223104693  | -0.218034163 |
| YKL124W   | -0.262037254 | 0.397623511  | -0.257492637 |
| YKL125W   | 0.077208373  | 0.202298803  | 0.078398342  |
| YKL126W   | 0.014249908  | 0.25972661   | 0.017369645  |
| YKL127W   | -0.014030237 | 0.043291919  | -0.017261543 |
| YKL128C   | 0.426939261  | -0.146473158 | 0.410583389  |
| YKL129C   | 1.270396088  | 0.133749403  | 1.200034605  |
| YKL130C   | -0.010117018 | -1.333726553 | -0.012826578 |
| YKL131W   | -0.010372606 | 0.117421508  | -0.012482345 |
| YKL132C   | 0.812385294  | -0.493040948 | 0.902469831  |
| YKL133C   | -0.000282334 | 0.302370878  | -0.000167113 |
| YKL134C   | 3.473015469  | 1.154590625  | 2.462553055  |
| YKL135C   | -3.66574885  | -1.086990708 | -2.646464435 |
| YKL136W   | -0.073155717 | 0.089707801  | -0.072080471 |
| YKL137W   | -0.007609289 | -0.914234922 | -0.007262453 |
| YKL138C   | 0.464981392  | -4.430108786 | 0.438920754  |
| YKL138C-A |              |              |              |
| YKL139W   | 2.819004578  | 0.183489789  | 2.337724384  |
| YKL140W   | -0.038765615 | -0.044721369 | -0.043595147 |
| YKL141W   | 1.106889691  | -0.006012457 | 1.467979089  |
| YKL142W   | -0.069889752 | -0.008343731 | -0.071184415 |
| YKL143W   | 1.72694287   | 0.11146962   | 1.698004515  |
| YKL144C   | 5.129883553  | 2.142300958  | 2.685878544  |
| YKL145W   | 2.465197881  | 2.129879597  | 2.460884614  |
| YKL145W-A |              |              |              |
| YKL146W   | -0.045272722 | 0.005118357  | -0.052720241 |
| YKL147C   | 0.209294756  | -0.165070145 | 0.23180613   |
| YKL148C   | -0.172897905 | 0.334745132  | -0.154986419 |
| YKL149C   | 0.468555957  | 0.193701763  | 0.571207409  |
| YKL150W   | 1.179386282  | 0.678536338  | 1.079843957  |
| YKL151C   | -0.451706438 | -0.053227549 | -0.502636964 |
| YKL152C   | 0.07695017   | 0.351518917  | 0.072638428  |
| YKL153W   | -0.035132982 | 0.755886571  | -0.045066928 |
| YKL154W   | -0.078601147 | -0.050528949 | -0.097966377 |
| YKL155C   | -0.213901004 | -0.078943562 | -0.172654149 |
| YKL156C-A |              |              |              |
| YKL156W   | -0.116124449 | 0.757709165  | -0.116088807 |
| YKL157W   | -0.006280713 | 0.11685521   | -0.007071824 |
| YKL158W   | 0.091487924  | -0.020035968 | 0.124958523  |
| YKL159C   | 2.519549961  | 0.017564232  | 1.383786656  |
| YKL160W   | -4.061647688 | 0.086295592  | -3.530952593 |
| YKL161C   | -1.459153177 | -1.800585052 | -1.508675723 |
| YKL162C   | 0.125218428  | 0.238168101  | 0.177660631  |
| YKL162C-A | -0.170594117 | -1.107118368 | -0.199530266 |
| YKL163W   | 0.022332935  | -0.095157481 | 0.026445344  |
| YKL164C   | 0.039431547  | 0.066375872  | 0.056056023  |
| YKL165C   | -0.05420214  | 0.399277587  | -0.059101618 |
| YKL165C-A |              |              |              |
| YKL166C   | -1.279341873 | -0.030310372 | -1.30477681  |
| YKL167C   | -0.088966638 | -0.169109034 | -0.100521712 |
| YKL168C   | -1.119152267 | -0.120565317 | -1.156538745 |
| YKL169C   | -0.033531343 | -0.098874806 | -0.034398825 |

|           |              |              |              |
|-----------|--------------|--------------|--------------|
| YKL170W   | 0.024619919  | -0.193760095 | 0.033681196  |
| YKL171W   | 0.76509073   | -0.013475143 | 0.770395987  |
| YKL172W   | 3.304370399  | 5.293787021  | 1.509565526  |
| YKL173W   | -0.147839179 | 0.079713493  | -0.180657411 |
| YKL174C   | -0.312755837 | 0.010062619  | -0.242038599 |
| YKL175W   | 0.007249006  | -0.031414812 | 0.007110405  |
| YKL176C   | 0.861654281  | 0.694517375  | 0.803701329  |
| YKL177W   | -0.362666159 | 0.153221874  | -0.376248607 |
| YKL178C   | 2.548414063  | 2.052651536  | 3.0397146    |
| YKL179C   | 0.036651752  | 1.365668718  | 0.050018084  |
| YKL180W   | 7.581888032  |              | 1.317535655  |
| YKL181W   | 0.014622369  | -0.214865568 | 0.019109027  |
| YKL182W   | -11.166071   | -5.666969214 | -9.895193159 |
| YKL183C-A |              |              |              |
| YKL183W   | -0.413260573 | 0.032522815  | -0.551799933 |
| YKL184W   | -0.043915428 | 0.04846264   | -0.048198031 |
| YKL185W   | 0.077554095  | 0.126087738  | 0.117275141  |
| YKL186C   | -0.013433008 | -0.012437678 | -0.017569415 |
| YKL187C   | -0.069047666 | 0.096143882  | -0.096821745 |
| YKL188C   | -0.040518719 |              | -0.038082953 |
| YKL189W   | 0.556169357  | -0.070094239 | 0.646119746  |
| YKL190W   | -0.012018733 | 0.170268368  | -0.015196264 |
| YKL191W   | -1.502977543 | -0.846416281 | -0.856064631 |
| YKL192C   | -0.009787027 | 0.142537007  | -0.008449653 |
| YKL193C   | 0.387041118  | -0.707379568 | 0.485022269  |
| YKL194C   | 0.061554458  | 0.089855223  | 0.063424415  |
| YKL195W   | -0.952275159 | 0.031307966  | -0.756248887 |
| YKL196C   | 0.985708051  | -0.10382752  | 1.270553354  |
| YKL197C   | 0.98019014   | 0.037808156  | 0.898541557  |
| YKL198C   | -0.193356342 | -0.003714629 | -0.222727911 |
| YKL199C   | -0.408865565 | 0.329157844  | -0.424928057 |
| YKL200C   |              | 4.74359804   |              |
| YKL201C   | 0.40205736   | 0.921729192  | 0.473633547  |
| YKL202W   | 0.067238725  | 0.015187971  | 0.082782204  |
| YKL203C   | -0.238661868 | 0.010403619  | -0.313116179 |
| YKL204W   | 2.274677587  | 1.100902711  | 2.213522161  |
| YKL205W   | -0.497144154 | -0.057789561 | -0.591329156 |
| YKL206C   | -0.097821986 | -0.846043964 | -0.082910608 |
| YKL207W   | -0.114212141 | -0.080240253 | -0.131088711 |
| YKL208W   | 0.005905807  | 0.368835575  | 0.008221822  |
| YKL209C   | 0.012694439  | -0.062660071 | 0.019673168  |
| YKL210W   | -0.091839447 | -0.632657346 | -0.063765052 |
| YKL211C   | 0.027217211  | 0.776180922  | 0.035571486  |
| YKL212W   | 1.938892534  | 0.0169812    | 2.219995043  |
| YKL213C   | 1.074410501  | 0.512717168  | 1.168632531  |
| YKL214C   | 0.025376302  | 0.106070605  | 0.026858737  |
| YKL215C   | 0.025154036  | 0.23168664   | 0.027395202  |
| YKL216W   | 0.202872934  | 2.146936258  | 0.158789757  |
| YKL217W   | 0.114170424  | 0.600251774  | 0.143617087  |
| YKL218C   | -0.001851129 | -0.002208348 | -0.001758827 |
| YKL219W   |              |              |              |
| YKL220C   | 0.61933087   | -0.00025705  | 0.826190148  |
| YKL221W   | 0.030413571  | 0.04920994   | 0.030264845  |

|           |              |              |              |
|-----------|--------------|--------------|--------------|
| YKL222C   | 0.038502483  | 0.81434484   | 0.036606048  |
| YKL223W   |              |              |              |
| YKL224C   |              |              |              |
| YKL225W   |              |              |              |
| YKR001C   | -0.244472946 | -0.339611294 | -0.217367843 |
| YKR002W   | 1.517072911  | -0.571080772 | 1.298308979  |
| YKR003W   | -0.471199761 | -0.221089528 | -0.480615343 |
| YKR004C   | -0.956533121 | -0.005007686 | -1.016213127 |
| YKR005C   | -0.628011271 | 0.156658094  | -0.693307165 |
| YKR006C   | -0.348184615 | -0.104597868 | -0.305284056 |
| YKR007W   | 0.191255047  | 0.648162997  | 0.251418064  |
| YKR008W   | 0.012087219  | -0.267808092 | 0.010385633  |
| YKR009C   | -0.144705935 | 0.032174124  | -0.183606629 |
| YKR010C   | -0.28494285  | 0.007929683  | -0.253955132 |
| YKR011C   | -0.28967223  | 0.191533062  | -0.397748609 |
| YKR012C   | 0.775051751  | 0.032176292  | 0.779006945  |
| YKR013W   | -6.34699051  | -1.756518922 | -4.182184975 |
| YKR014C   | -0.224588334 | -0.871164827 | -0.274626788 |
| YKR015C   | -0.369679808 | -0.166470839 | -0.42263625  |
| YKR016W   | 0.111881502  | 0.041994984  | 0.124072352  |
| YKR017C   | -0.423001933 | 0.081330087  | -0.366236146 |
| YKR018C   | -1.489118696 | 0.023400079  | -1.786711757 |
| YKR019C   | 0.100892629  | 2.360842621  | 0.07388952   |
| YKR020W   | -0.761459098 | 0.662528989  | -0.817285216 |
| YKR021W   | -1.101754248 | -0.090013586 | -1.333048293 |
| YKR022C   | -0.036139391 | -0.50424291  | -0.044192224 |
| YKR023W   | 0.197063706  | -0.032776642 | 0.255439317  |
| YKR024C   | -0.012381357 | -0.085947911 | -0.017667596 |
| YKR025W   | 1.771193535  | 2.223333509  | 1.96784009   |
| YKR026C   | -0.071196755 | 0.293599098  | -0.090768398 |
| YKR027W   | -0.226984021 | 0.201450074  | -0.235567541 |
| YKR028W   | 0.002068181  | -0.182114145 | 0.002221206  |
| YKR029C   | 0.018535197  | 1.159181865  | 0.018673999  |
| YKR030W   | -0.75929002  | -0.099020513 | -0.812633166 |
| YKR031C   | 0.054700678  | -0.121909836 | 0.061105069  |
| YKR032W   | 0.070721981  | 0.003236926  | 0.096665051  |
| YKR033C   | 0.017596418  | -0.001323296 | 0.02500217   |
| YKR034W   | -0.735548623 | -0.035134392 | -0.707874094 |
| YKR035C   | 0.002961211  | -0.356311079 | 0.00372003   |
| YKR035W-A | 4.87E-05     | 1.265851595  | 5.51E-05     |
| YKR036C   | -0.43669735  | -0.076965955 | -0.473437838 |
| YKR037C   | 0.114817619  | -0.094163869 | 0.111917905  |
| YKR038C   | -1.067678058 | -0.101029018 | -0.997896968 |
| YKR039W   | -1.209728651 | -1.360243477 | -1.128383763 |
| YKR040C   | -0.097697463 | -0.17049611  | -0.115170443 |
| YKR041W   | 0.003818973  | -0.024396078 | 0.004534079  |
| YKR042W   | 0.163366541  | -0.540814203 | 0.157585019  |
| YKR043C   | 0.240812718  | 0.557222742  | 0.323744796  |
| YKR044W   | -0.16594     | 0.036039884  | -0.186132943 |
| YKR045C   | -0.041824415 | 0.030814137  | -0.046415736 |
| YKR046C   | 0.033670544  | 1.034052434  | 0.039188259  |
| YKR047W   | -1.197935177 | -0.745947699 | -1.803924333 |
| YKR048C   | -0.071715717 | -0.17292946  | -0.082647198 |

|           |              |              |              |
|-----------|--------------|--------------|--------------|
| YKR049C   | 0.009814738  | 0.037653875  | 0.010734944  |
| YKR050W   | 0.134684436  | 0.080528007  | 0.151399071  |
| YKR051W   | -0.863831103 | -1.446522323 | -0.785710966 |
| YKR052C   | -0.425959707 | -3.010255239 | -0.3215419   |
| YKR053C   | -0.194873339 | 0.819043909  | -0.270551547 |
| YKR054C   | -0.050358427 | -0.174688797 | -0.057631387 |
| YKR055W   | -0.031390484 | -0.840707165 | -0.041375413 |
| YKR056W   | -0.998866388 | 0.218973689  | -1.153294508 |
| YKR057W   | 1.42614375   | 4.283582368  | 0.677733353  |
| YKR058W   | 1.525815556  | 0.995420787  | 2.178184455  |
| YKR059W   | 11.22761914  | 2.086146908  | 10.87798482  |
| YKR060W   | -0.234846685 | -1.408822287 | -0.202387123 |
| YKR061W   | -0.07576637  | -0.529408329 | -0.071187065 |
| YKR062W   | -0.155386771 | -0.058975629 | -0.150510984 |
| YKR063C   | -0.955302365 | 0.000589822  | -1.203442218 |
| YKR064W   | -0.217756079 | -0.415558062 | -0.273671514 |
| YKR065C   | -1.282489945 | 0.071976392  | -1.391003674 |
| YKR066C   | -0.811447496 | -1.444511073 | -0.822367771 |
| YKR067W   | -0.875034524 | 1.074437317  | -0.845517129 |
| YKR068C   | 0.008033061  | -0.346895048 | 0.007618132  |
| YKR069W   | -0.605368492 | -0.081697579 | -0.876663188 |
| YKR070W   | -0.340375491 | -0.052045729 | -0.45373003  |
| YKR071C   | -0.001583021 | 0.03667557   | -0.001579117 |
| YKR072C   | -4.422557123 | -3.326408677 | -2.294788102 |
| YKR073C   | -2.513744628 | -1.213834945 | -1.962686387 |
| YKR074W   | -0.045793131 | 0.107508964  | -0.062494781 |
| YKR075C   | 0.0592648    | -0.519164053 | 0.077001132  |
| YKR075W-A |              |              |              |
| YKR076W   | 0.30759416   | -1.110945752 | 0.451667482  |
| YKR077W   | 0.889115672  | 0.112911818  | 1.254314266  |
| YKR078W   | -11.95708998 | -6.311938045 | -6.280121567 |
| YKR079C   | -0.085970495 | 0.003569271  | -0.096937561 |
| YKR080W   | 0.02824395   | 0.008558607  | 0.042174913  |
| YKR081C   | 0.353252288  | 0.779591795  | 0.440799445  |
| YKR082W   | 2.57661649   | 0.381470078  | 2.401943836  |
| YKR083C   | -0.818224511 | -0.164924834 | -1.103530584 |
| YKR084C   | -0.982179231 | -0.232902532 | -1.056332917 |
| YKR085C   | -0.006705061 | -0.010978813 | -0.0072159   |
| YKR086W   | -1.128298743 | -0.071038775 | -1.134047256 |
| YKR087C   | -0.491140389 | -1.448358815 | -0.53567537  |
| YKR088C   | 0.004147001  | -0.117873125 | 0.005795967  |
| YKR089C   | -0.026037189 | -0.158141069 | -0.029519871 |
| YKR090W   | 1.056974423  | -0.019308054 | 1.171631759  |
| YKR091W   | -0.009287752 | 0.782081114  | -0.007727861 |
| YKR092C   | 0.607028635  | -2.521221437 | 0.429425294  |
| YKR093W   | -0.527216616 | -1.473866198 | -0.357648022 |
| YKR094C   | 3.858759402  | 3.155635478  | 1.892526611  |
| YKR095W   | -0.238253137 | -1.62504123  | -0.202874832 |
| YKR095W-A |              |              |              |
| YKR096W   | 0.022762469  | -0.03617127  | 0.019324304  |
| YKR097W   | 0.002480949  | 0.072207668  | 0.003088292  |
| YKR098C   | 0.005435757  | -0.130355706 | 0.005638563  |
| YKR099W   | -0.023710269 | -0.20148056  | -0.019923185 |

|           |              |              |              |
|-----------|--------------|--------------|--------------|
| YKR100C   | -0.184609969 | -1.182804661 | -0.20256259  |
| YKR101W   | 0.073532876  | -0.051598297 | 0.075900559  |
| YKR102W   | 0.001837735  | -0.089373037 | 0.002239791  |
| YKR103W   | 0.044585305  | 0.058117174  | 0.048865094  |
| YKR104W   | -0.001661455 | 0.662897239  | -0.002001322 |
| YKR105C   | 0.079596408  | -0.000406889 | 0.067643309  |
| YKR106W   | -1.542721093 | -1.673199504 | -1.257483806 |
| YLL001W   | -1.133635077 | -0.074357919 | -1.048596814 |
| YLL002W   | -0.029255308 | -0.173548136 | -0.02628821  |
| YLL003W   | -0.1679689   | 0.195596666  | -0.210215593 |
| YLL004W   | -0.470539481 | 0.059202655  | -0.418395737 |
| YLL005C   | -0.404233381 | -0.598672779 | -0.53678162  |
| YLL006W   | -0.928949671 | -1.244052905 | -1.12139015  |
| YLL006W-A |              |              |              |
| YLL007C   | 0.196429064  | 0.001560297  | 0.151523207  |
| YLL008W   | 0.122211569  | -0.033541195 | 0.125935497  |
| YLL009C   | -12.29834624 | -7.847569594 | -5.410452544 |
| YLL010C   | -0.118335187 | 0.291577091  | -0.13787807  |
| YLL011W   | -0.777899864 | -0.021078848 | -0.793020909 |
| YLL012W   | 0.001717724  | -0.689660193 | 0.001992627  |
| YLL013C   | 3.034232837  | 4.543615464  | 2.480747203  |
| YLL014W   | -0.684802284 | -0.392160702 | -0.949308693 |
| YLL015W   | -0.063395249 | -0.008051218 | -0.090309646 |
| YLL016W   | -0.601877402 | 0.016708355  | -0.787144309 |
| YLL017W   | -0.848487757 | -0.265969234 | -1.100057604 |
| YLL018C   | 0.007500827  | -0.061784859 | 0.007382955  |
| YLL018C-A | -0.471800098 | -0.057470977 | -0.459458068 |
| YLL019C   | 0.044746856  | -0.003940821 | 0.048156174  |
| YLL019W-A |              |              |              |
| YLL020C   | 0.14217587   | 0.600933522  | 0.17363809   |
| YLL021W   | -0.018421877 | 0.032477078  | -0.015262457 |
| YLL022C   |              |              |              |
| YLL023C   | 0.017978122  | 0.022896393  | 0.016679065  |
| YLL024C   | 0.740513894  | 0.093598769  | 0.659126285  |
| YLL025W   | -0.278661    | 0.817780302  | -0.3426553   |
| YLL026W   | 0.000906889  | -0.534121701 | 0.001380722  |
| YLL027W   | 0.790157143  | 2.572287574  | 0.846229136  |
| YLL028W   | 0.012112796  | 0.529790341  | 0.01012132   |
| YLL029W   | -0.037237152 | -1.887558588 | -0.031314973 |
| YLL030C   | 0.465418903  | 0.048582741  | 0.60123041   |
| YLL031C   | 0.432286145  | 0.374529766  | 0.393599566  |
| YLL032C   | 0.130152899  | 0.014055041  | 0.1309767    |
| YLL033W   | 0.042102008  | 1.736009587  | 0.040618926  |
| YLL034C   | -0.237251109 | -2.377350255 | -0.261088604 |
| YLL035W   | 0.000626629  | -1.465330127 | 0.000775289  |
| YLL036C   | -0.324323129 | -0.563894766 | -0.252471174 |
| YLL037W   | -1.773149609 | -1.992268137 | -1.828921799 |
| YLL038C   | -0.085477262 | -2.277664432 | -0.074223086 |
| YLL039C   | -0.006858125 | 0.132076672  | -0.007215155 |
| YLL040C   | 0.615822956  | 0.069571172  | 0.739862472  |
| YLL041C   | 0.002410019  | -0.0738882   | 0.0021755    |
| YLL042C   | 0.027262558  | 1.662329386  | 0.036793456  |
| YLL043W   | -1.570777724 | 0.094094517  | -1.780702136 |

|           |              |              |              |
|-----------|--------------|--------------|--------------|
| YLL044W   | -0.062711286 | 0.123083302  | -0.067858601 |
| YLL045C   | -0.050957426 | 0.022531696  | -0.055883393 |
| YLL046C   | 0.672700937  | -0.109557229 | 0.841646797  |
| YLL047W   | 0.195040908  | 0.272290262  | 0.200514056  |
| YLL048C   | 0.434493665  | -0.081175667 | 0.490362243  |
| YLL049W   | 0.039018558  | 0.204712984  | 0.058581395  |
| YLL050C   | 0.000200482  | -2.325756111 | 0.000174877  |
| YLL051C   | -0.016195763 | -0.107304924 | -0.01575324  |
| YLL052C   | 0.049910589  | 0.288006428  | 0.055189404  |
| YLL053C   | -0.042334124 | -0.150211092 | -0.042042769 |
| YLL054C   | 0.34287678   | -0.023019929 | 0.503501972  |
| YLL055W   | 0.218072938  | 0.36469936   | 0.196397869  |
| YLL056C   | -0.01953663  | 1.038591033  | -0.019941917 |
| YLL057C   | -0.566673529 | -0.020179919 | -0.552264133 |
| YLL058W   | -0.943942635 | 0.096058229  | -0.893659347 |
| YLL059C   | -0.034026672 | -0.072536571 | -0.037742231 |
| YLL060C   | 0.450862079  | -0.004644695 | 0.454276474  |
| YLL061W   | 0.266804392  | -0.52369395  | 0.223318042  |
| YLL062C   | 0.415150625  | 0.027200243  | 0.467554222  |
| YLL063C   | -1.280214755 | -0.787393138 | -1.048747336 |
| YLL064C   |              |              |              |
| YLL065W   |              |              |              |
| YLL066C   |              |              |              |
| YLL066W-A |              |              |              |
| YLL066W-B |              |              |              |
| YLL067C   |              |              |              |
| YLL067W-A |              |              |              |
| YLR001C   | -0.087943671 | -1.247296496 | -0.086805249 |
| YLR002C   | -0.021813428 | -0.049043825 | -0.016422127 |
| YLR003C   | -2.312399811 | -0.139010847 | -1.888942603 |
| YLR004C   | 0.023560836  | 1.625767517  | 0.024827228  |
| YLR005W   | 2.262022014  | 0.16297339   | 2.356907338  |
| YLR006C   | -0.028574874 | 0.017760305  | -0.022163239 |
| YLR007W   | 1.284111995  | 0.367464627  | 1.154547751  |
| YLR008C   | -0.119338941 | 0.117170106  | -0.113335061 |
| YLR009W   | 6.806130542  | 5.030178664  | 2.257944489  |
| YLR010C   | -0.050412908 | -0.069507426 | -0.063644026 |
| YLR011W   | -0.277735335 | 0.002277158  | -0.313687638 |
| YLR012C   | -0.084784817 | -0.123731683 | -0.074371079 |
| YLR013W   | 0.000333232  | -0.217022566 | 0.000315048  |
| YLR014C   | 1.552081314  | 2.347666476  | 0.917062637  |
| YLR015W   | 0.144306188  | 0.185174144  | 0.146603368  |
| YLR016C   | -0.015551184 | 1.33515172   | -0.017205591 |
| YLR017W   | 0.164480662  | -0.55607404  | 0.237790326  |
| YLR018C   | 1.014554751  | -0.225385828 | 1.354281798  |
| YLR019W   | -0.052590811 | -0.116765512 | -0.060950145 |
| YLR020C   | 0.119233323  | -0.058704778 | 0.125589184  |
| YLR021W   | -0.601771098 | 0.049776175  | -0.725715263 |
| YLR022C   | -7.271618419 | -0.109469069 | -3.229683909 |
| YLR023C   | -0.495027956 | 1.885833145  | -0.437880341 |
| YLR024C   | 0.807753335  | 0.94246094   | 0.763742423  |
| YLR025W   | -10.08571243 | -25.54656428 | -4.953976326 |
| YLR026C   | 0.928845412  | 0.26224244   | 1.28539249   |

|         |              |              |              |
|---------|--------------|--------------|--------------|
| YLR027C | -0.001750941 | -0.017098251 | -0.002331349 |
| YLR028C | -0.030078068 | 0.020872522  | -0.033376291 |
| YLR029C | -0.958433531 | 1.277425381  | -0.700782605 |
| YLR030W | 6.48E-05     | 0.243812372  | 7.90E-05     |
| YLR031W | -0.110136396 | -0.12280051  | -0.079945678 |
| YLR032W | -0.180393447 | -0.862204775 | -0.171335826 |
| YLR033W | 8.443030086  | 6.786780982  | 2.968567003  |
| YLR034C | 0.082819798  | -0.220223851 | 0.078857944  |
| YLR035C | -0.009251155 | -0.797989319 | -0.009416704 |
| YLR036C | 0.003126367  | -0.522077922 | 0.003357301  |
| YLR037C | -1.874778215 | 0.834925377  | -1.957725614 |
| YLR038C | -1.975895447 | -1.583545958 | -1.648224677 |
| YLR039C | 0.305518763  | 0.670364489  | 0.309060477  |
| YLR040C | 0.013746318  | 1.030935518  | 0.015708878  |
| YLR041W | -0.140701623 | -0.094814405 | -0.149478949 |
| YLR042C | -0.10320843  | -1.043226251 | -0.108542557 |
| YLR043C | 0.971806966  | 0.115066759  | 0.631810792  |
| YLR044C | 0.44284027   | 0.165244895  | 0.397972173  |
| YLR045C | 0.037986939  | -1.445412566 | 0.050134821  |
| YLR046C | -3.261876787 | 0.107797752  | -3.207270006 |
| YLR047C | -0.761389185 | -0.081194963 | -0.917838245 |
| YLR048W | 8.482228441  | 5.634561687  | 2.668113219  |
| YLR049C | 0.043617729  | -0.462392385 | 0.040506201  |
| YLR050C | -0.135343558 | 0.246282166  | -0.120208354 |
| YLR051C | 0.0587339    | -0.075111888 | 0.056925616  |
| YLR052W | -2.288732801 | -1.022605891 | -1.620539884 |
| YLR053C | 0.006053496  | -0.159699381 | 0.005755609  |
| YLR054C | 1.022064817  | -0.253466067 | 0.906527157  |
| YLR055C | -0.719204179 | 0.168686117  | -0.638031945 |
| YLR056W | 0.04511158   | 0.086821637  | 0.046636338  |
| YLR057W | 0.162645754  | -0.057628626 | 0.139567229  |
| YLR058C | -0.043320248 | -2.050277897 | -0.045220427 |
| YLR059C | -0.033660404 | -1.212119255 | -0.031747669 |
| YLR060W | -0.061869036 | 0.074487782  | -0.054089887 |
| YLR061W | 1.949429072  | 3.019067539  | 0.612961065  |
| YLR062C | 1.640213092  | 2.378175664  | 0.657057746  |
| YLR063W | -0.060348159 | -0.145848071 | -0.052870109 |
| YLR064W | -1.28829706  | -1.518562952 | -1.014417151 |
| YLR065C | -0.273979897 | -0.061633057 | -0.301800967 |
| YLR066W | -0.04605733  | 0.020475583  | -0.031204465 |
| YLR067C | 0.207966901  | -1.4095827   | 0.254749517  |
| YLR068W | 0.016922928  | -0.405992647 | 0.014210252  |
| YLR069C | -0.024834547 | -0.896654572 | -0.019037571 |
| YLR070C | 0.453814569  | 0.004683711  | 0.544392459  |
| YLR071C | -1.934100901 | -0.080633882 | -1.703701563 |
| YLR072W | -0.097075014 | -0.924374648 | -0.096903183 |
| YLR073C | 0.084057005  | -0.001747342 | 0.087427169  |
| YLR074C | -4.647069997 | -3.57609411  | -2.36124004  |
| YLR075W | 2.468524937  | 2.48984195   | 1.062239589  |
| YLR076C | 1.838105918  | 5.911403886  | 0.589828972  |
| YLR077W | 0.079763388  | 0.785691456  | 0.087220787  |
| YLR078C | 0.727128312  | 0.012750224  | 0.891867997  |
| YLR079W | -0.452175794 | -0.079387449 | -0.466150827 |



|           |              |              |              |
|-----------|--------------|--------------|--------------|
| YLR080W   | -0.718973004 | -1.624645119 | -0.56658754  |
| YLR081W   | 0.10380178   | -1.803909686 | 0.103682941  |
| YLR082C   | 0.051735762  | -0.503443674 | 0.051421454  |
| YLR083C   | 0.643502011  | -0.446825282 | 0.522150835  |
| YLR084C   |              |              |              |
| YLR085C   | 0.751646647  | -0.991434438 | 0.819517403  |
| YLR086W   | 0.034585205  | -0.057346638 | 0.029733537  |
| YLR087C   | 0.010373625  | -0.202420851 | 0.010311195  |
| YLR088W   | 0.331166642  | -1.076493841 | 0.199208046  |
| YLR089C   | -0.01317999  | -0.488043103 | -0.014743303 |
| YLR090W   | -1.144125862 | -6.610145612 | -0.561071757 |
| YLR091W   | -1.068356096 | -0.024116207 | -1.059964089 |
| YLR092W   | 2.132601281  | 0.616432929  | 1.542345321  |
| YLR093C   | 1.451204824  | 0.295946745  | 1.125510395  |
| YLR094C   | 0.821071549  | 1.226545079  | 0.711578809  |
| YLR095C   | -2.470673403 | -1.839662618 | -2.556724332 |
| YLR096W   | -1.746766828 | -1.075425068 | -1.796958164 |
| YLR097C   | -0.070294094 | 0.033248366  | -0.059918406 |
| YLR098C   | -0.524088076 | -0.748156585 | -0.498298113 |
| YLR099C   | 1.872706507  | 3.098362192  | 1.213492636  |
| YLR099W-A |              |              |              |
| YLR100W   | -0.084921252 | 0.011962795  | -0.057968945 |
| YLR101C   | -0.0422393   | -1.750170705 | -0.040969361 |
| YLR102C   | 1.079824502  | -0.015576463 | 1.265759456  |
| YLR103C   | -0.546058541 | -0.27200541  | -0.547731128 |
| YLR104W   | -1.526963703 | -0.019833004 | -1.184998853 |
| YLR105C   | 0.783074121  | 4.365752998  | 0.47311041   |
| YLR106C   | -0.048554085 | -0.745549989 | -0.04278752  |
| YLR107W   | -0.132300469 | -1.429394031 | -0.113211102 |
| YLR108C   | 0.06499257   | 0.046264997  | 0.071117782  |
| YLR109W   | -1.291719934 | -0.044363054 | -1.208399839 |
| YLR110C   | 4.615217836  | 0.000690386  | 3.093105984  |
| YLR111W   | 1.171512053  | -0.169283743 | 1.06134998   |
| YLR112W   | -0.886748173 | 0.347785134  | -0.970779691 |
| YLR113W   | -0.008314209 | 1.390070255  | -0.008900591 |
| YLR114C   | 1.528064761  | 0.890882561  | 1.581922601  |
| YLR115W   | -0.152343457 | 0.066374431  | -0.131307421 |
| YLR116W   | -0.368609417 | -0.043445392 | -0.313861384 |
| YLR117C   | 0.063496121  | -0.60101099  | 0.045389402  |
| YLR118C   |              | -4.718694995 |              |
| YLR119W   | -1.337264135 | -1.08233867  | -1.35037872  |
| YLR120C   | 0.021310781  | -0.20173984  | 0.025339211  |
| YLR120W-A |              |              |              |
| YLR121C   | -0.057895813 | -0.085633884 | -0.047201436 |
| YLR122C   | 0.434096031  | -0.032888309 | 0.427633844  |
| YLR123C   | -0.089960156 | 0.023569296  | -0.102086185 |
| YLR124W   | -0.74389879  | -0.003113048 | -0.640240915 |
| YLR125W   |              |              |              |
| YLR126C   | 0.148737209  | 0.048684957  | 0.142619233  |
| YLR127C   | -2.93300202  | -2.51032512  | -1.993873006 |
| YLR128W   | -0.261602966 | 0.08288675   | -0.192868313 |
| YLR129W   | 0.093218352  | 0.150859719  | 0.055181542  |
| YLR130C   | -1.094761887 | -0.054175377 | -1.066042391 |

|           |              |              |              |
|-----------|--------------|--------------|--------------|
| YLR131C   | 1.95954935   | 0.178796713  | 2.561669256  |
| YLR132C   | -0.022777026 | -0.091664778 | -0.025768391 |
| YLR133W   | 1.290659247  | 0.482475307  | 1.511064185  |
| YLR134W   |              |              |              |
| YLR135W   | 0.160149748  | -0.366035376 | 0.18627543   |
| YLR136C   | 0.032675495  | -0.089603053 | 0.043974257  |
| YLR137W   | -0.100132887 | 0.743969794  | -0.121270387 |
| YLR138W   | 0.008688203  | 0.018793854  | 0.008159486  |
| YLR139C   | 2.015071355  | 0.019634606  | 1.567442508  |
| YLR140W   | 0.211138514  | 0.93344822   | 0.246203227  |
| YLR141W   | -0.000516699 | -0.211325115 | -0.000493259 |
| YLR142W   | 0.092104138  | -0.031580126 | 0.110325177  |
| YLR143W   | 0.001264245  | 1.214178599  | 0.001278501  |
| YLR144C   | -1.109439056 | 0.064184576  | -1.01650403  |
| YLR145W   | -0.067975236 | -0.009952704 | -0.070791085 |
| YLR146C   | -0.008572618 | 1.106340168  | -0.010502742 |
| YLR146W-A |              |              |              |
| YLR147C   | 2.388567756  | 1.060318778  | 1.54410321   |
| YLR148W   | -0.364878599 | -0.040736352 | -0.396897774 |
| YLR149C   | 0.406723025  | 0.602034532  | 0.439829547  |
| YLR149C-A |              |              |              |
| YLR150W   | 5.253859826  | 0.049554507  | 2.920303082  |
| YLR151C   | 0.240015316  | -0.086993934 | 0.220288501  |
| YLR152C   | -0.378645911 | 0.376310964  | -0.341711045 |
| YLR153C   | -1.439710077 | 0.12083828   | -1.108925837 |
| YLR154C   | 0.003532874  | 0.592898655  | 0.003613413  |
| YLR154C-G |              |              |              |
| YLR154C-H |              |              |              |
| YLR154W-A |              |              |              |
| YLR154W-B |              |              |              |
| YLR154W-C |              |              |              |
| YLR154W-E |              |              |              |
| YLR154W-F |              |              |              |
| YLR155C   |              |              |              |
| YLR156C-A |              |              |              |
| YLR156W   |              |              |              |
| YLR157C   |              |              |              |
| YLR157C-C |              |              |              |
| YLR157W-D |              |              |              |
| YLR157W-E |              |              |              |
| YLR158C   |              |              |              |
| YLR159C-A |              |              |              |
| YLR159W   |              |              |              |
| YLR160C   |              |              |              |
| YLR161W   |              |              |              |
| YLR162W   |              |              |              |
| YLR162W-A |              |              |              |
| YLR163C   | 0.002289142  | -1.219894326 | 0.002178832  |
| YLR163W-A |              |              |              |
| YLR164W   | 0.276362066  | 0.297923545  | 0.217044228  |
| YLR165C   | 0.897597455  | -1.268688721 | 0.654516621  |
| YLR166C   | 0.963762396  | -0.015118268 | 0.877298711  |
| YLR167W   | 1.003831276  | 0.405959929  | 0.632357353  |

|         |              |              |              |
|---------|--------------|--------------|--------------|
| YLR168C | -0.132937188 | -0.619946584 | -0.118823127 |
| YLR169W | -0.032716244 | 0.043659328  | -0.041372333 |
| YLR170C | -3.04E-05    | 0.023655969  | -3.59E-05    |
| YLR171W | 0.014699291  | 0.030063002  | 0.016362742  |
| YLR172C | 0.025459851  | 0.050109116  | 0.038872804  |
| YLR173W | -1.4030644   | -0.634031421 | -1.685613504 |
| YLR174W | -0.010420045 | 0.768381445  | -0.013515034 |
| YLR175W | 0.118829125  | 0.038281186  | 0.130900176  |
| YLR176C | -0.02968301  | -0.041889285 | -0.031883443 |
| YLR177W | -0.228771783 | 0.730544855  | -0.245603131 |
| YLR178C | -0.038392943 | -1.358150194 | -0.039592812 |
| YLR179C | -1.272200293 | -0.171690626 | -1.426022947 |
| YLR180W | 0.075835721  | -0.020371912 | 0.090652678  |
| YLR181C | 0.521135947  | 0.909273238  | 0.481055706  |
| YLR182W | -0.074692455 | -0.171501476 | -0.080986604 |
| YLR183C | -0.012063538 | -1.06696035  | -0.01717746  |
| YLR184W | 0.171378054  | 2.93346654   | 0.107302869  |
| YLR185W | 1.51833897   | 3.306170704  | 0.931018408  |
| YLR186W | 0.016104786  | -0.215637611 | 0.018030291  |
| YLR187W | 0.037603618  | -0.034324465 | 0.046839429  |
| YLR188W | -0.649404778 | -0.61225999  | -0.968176221 |
| YLR189C | -0.022207732 | -0.09930549  | -0.030327321 |
| YLR190W | 0.337544522  | -0.050580947 | 0.459459051  |
| YLR191W | -0.11397572  | -0.017004001 | -0.153170834 |
| YLR192C | 0.019534482  | 0.012321515  | 0.018848338  |
| YLR193C | -0.102200294 | 0.344857801  | -0.151326282 |
| YLR194C | 0.144040174  | 0.006650312  | 0.107178676  |
| YLR195C | -0.001616315 | -0.063721408 | -0.00197827  |
| YLR196W | 0.9266978    | 0.804082499  | 0.871158211  |
| YLR197W | 2.242764117  | 0.919359268  | 0.964128018  |
| YLR198C | 2.186192115  | 2.514059993  | 1.013034507  |
| YLR199C | -0.065838221 | 0.01974617   | -0.09245234  |
| YLR200W | 0.983426066  | 0.955303561  | 1.487029965  |
| YLR201C | 3.866681433  | 2.798942274  | 3.678429541  |
| YLR202C | 2.043637334  | 3.172353111  | 2.056632132  |
| YLR203C | -0.020749021 | 0.655390802  | -0.029748339 |
| YLR204W | 0.092897728  | 0.078639938  | 0.139162738  |
| YLR205C | -0.00765976  | 0.36207984   | -0.01162719  |
| YLR206W | -0.051673552 | 0.805526762  | -0.063249287 |
| YLR207W | 2.68463337   | 0.2326592    | 2.42397337   |
| YLR208W | 10.45050715  | 2.735447298  | 4.952558941  |
| YLR209C | 0.067364517  | -0.039274387 | 0.076348297  |
| YLR210W | 0.028380005  | 0.256607653  | 0.034745674  |
| YLR211C | 1.440945487  | 0.180403752  | 2.076830522  |
| YLR212C | -0.006109689 | -0.116709985 | -0.006585214 |
| YLR213C | 0.064904497  | 0.015829506  | 0.080533871  |
| YLR214W | 1.236804896  | -0.161123352 | 0.897117332  |
| YLR215C | -0.409537188 | 0.077162089  | -0.430454308 |
| YLR216C | -0.002328536 | -0.041171476 | -0.003003825 |
| YLR217W | 0.024780342  | 1.251743531  | 0.034813436  |
| YLR218C | -0.932838541 | 0.032204257  | -1.003746833 |
| YLR219W | 0.091565655  | 0.672624005  | 0.129562631  |
| YLR220W | 0.025191388  | 0.046226129  | 0.031145962  |

|           |              |              |              |
|-----------|--------------|--------------|--------------|
| YLR221C   | 0.001881599  | -0.071326929 | 0.002365223  |
| YLR222C   | 5.349557761  | 5.149386374  | 2.170469403  |
| YLR222C-A |              |              |              |
| YLR223C   | 0.068260799  | -1.242110971 | 0.092111005  |
| YLR224W   | 0.00119275   | -1.03647445  | 0.001399243  |
| YLR225C   | 0.02253905   | 3.157575915  | 0.013079363  |
| YLR226W   | -0.458678846 | 0.045738831  | -0.597366198 |
| YLR227C   | -0.042098486 | 0.093929011  | -0.054521128 |
| YLR228C   | -0.500944031 | -1.998596954 | -0.33055153  |
| YLR229C   |              | -0.192613295 |              |
| YLR230W   | 0.348476539  | 0.032636196  | 0.390937582  |
| YLR231C   | 0.049034104  | -0.084863273 | 0.058334796  |
| YLR232W   | -0.005004362 | -0.265798653 | -0.004570471 |
| YLR233C   | 0.048116867  | 0.029044347  | 0.060554263  |
| YLR234W   | -0.005109384 | 0.009995445  | -0.005346803 |
| YLR235C   | 0.124486115  | 0.016376622  | 0.178887328  |
| YLR236C   | 1.215809906  | -0.814830628 | 1.466185706  |
| YLR237W   | 0.199194788  | -1.75E-05    | 0.218853177  |
| YLR238W   | -0.042396952 | -0.05764814  | -0.043813979 |
| YLR239C   | 0.110786528  | 0.128085804  | 0.14039579   |
| YLR240W   | 0.005349767  | 0.759114197  | 0.006444562  |
| YLR241W   | 0.702667355  | 0.157944668  | 0.930012219  |
| YLR242C   | 0.068044469  | 0.327485041  | 0.081767296  |
| YLR243W   | -0.081887506 | -0.008349084 | -0.077992139 |
| YLR244C   | 0.27164387   | 0.376210028  | 0.293214092  |
| YLR245C   |              |              |              |
| YLR246W   | 0.913180385  | 0.01454026   | 0.812029824  |
| YLR247C   | -0.896816203 | -0.188464749 | -1.059711083 |
| YLR248W   | -0.067058886 | -0.749953735 | -0.076158711 |
| YLR249W   | 2.01660417   | 1.197790153  | 1.838208678  |
| YLR250W   | 0.021147277  | -0.225876079 | 0.023631654  |
| YLR251W   |              |              |              |
| YLR252W   | -0.466138537 | 0.080463858  | -0.567686379 |
| YLR253W   | -0.00099198  | -0.053694549 | -0.001271837 |
| YLR254C   | -0.05304727  | 0.005655793  | -0.065946365 |
| YLR255C   | -0.155022048 | -0.369337683 | -0.189026908 |
| YLR256W   |              |              |              |
| YLR257W   | 0.046560509  | 0.23740105   | 0.053298872  |
| YLR258W   | -0.015721082 | 0.024137361  | -0.019714307 |
| YLR259C   | 1.672669735  | 0.074306544  | 2.329757726  |
| YLR260W   | -0.010891216 | -0.026051114 | -0.01411476  |
| YLR261C   | -0.004298288 | 0.917413105  | -0.004671834 |
| YLR262C   | 0.175882891  | 0.529457418  | 0.216806272  |
| YLR262C-A | -0.050629238 | -0.411149375 | -0.039459648 |
| YLR263W   | -0.023087929 | -0.023612662 | -0.0337397   |
| YLR264C-A |              |              |              |
| YLR264W   | -2.513348803 | -0.203901483 | -2.657215495 |
| YLR265C   | -10.84001184 | -6.966360475 | -7.346862254 |
| YLR266C   | -1.371469708 | 0.789549097  | -1.365850143 |
| YLR267W   | -0.000841576 | -0.024425711 | -0.00120079  |
| YLR268W   | 0.070191129  | -0.042435378 | 0.082986324  |
| YLR269C   | 0.033836078  | 0.570907429  | 0.0399958    |
| YLR270W   | -0.009692435 | -0.021778313 | -0.010524645 |

|           |              |              |              |
|-----------|--------------|--------------|--------------|
| YLR271W   | 0.065830102  | 0.352355648  | 0.086109613  |
| YLR272C   | -0.421835595 | -0.011676715 | -0.515496044 |
| YLR273C   | -0.073340788 | 0.055536107  | -0.090630189 |
| YLR274W   | -0.024072455 | -0.127194832 | -0.0285888   |
| YLR275W   | 1.110475437  | 0.45802022   | 0.714365266  |
| YLR276C   | 1.196724667  | 2.594999452  | 0.818527748  |
| YLR277C   | 0.295179246  | -0.167236213 | 0.370570268  |
| YLR278C   | -0.002887566 | -1.353207331 | -0.003607606 |
| YLR279W   | -2.070355902 | -0.66712187  | -1.822349633 |
| YLR280C   | -2.260000014 | -0.005430285 | -2.428082061 |
| YLR281C   | -3.195331853 | -2.162514523 | -2.204622211 |
| YLR282C   | -2.441227063 | -0.250613645 | -1.952800921 |
| YLR283W   | -2.048033594 | -0.165174301 | -1.204217222 |
| YLR284C   | -2.14712434  | -1.030792776 | -1.336017583 |
| YLR285C-A |              |              |              |
| YLR285W   | -4.359807799 | -1.693925268 | -2.401915839 |
| YLR286C   | 3.413496474  | -0.521304949 | 2.048397864  |
| YLR286W-A |              |              |              |
| YLR287C   | -2.364836874 | -1.543317406 | -1.715908827 |
| YLR287C-A | 1.388303098  | -0.240271943 | 0.737042712  |
| YLR288C   | -2.31388878  | -1.043266116 | -1.815922014 |
| YLR289W   | -4.205949552 | -2.975651346 | -2.759665444 |
| YLR290C   | -2.563098581 | -0.925157013 | -2.117227651 |
| YLR291C   | -0.310435145 | 0.015601154  | -0.266372213 |
| YLR292C   | -2.166704286 | -0.086432388 | -1.854350754 |
| YLR293C   | -19.3073988  | -18.21371142 | -2.406822866 |
| YLR294C   | -4.330339972 | -0.922579741 | -3.558658087 |
| YLR295C   | 3.389650946  | 4.125086645  | 1.597083959  |
| YLR296W   | -1.705100049 | -0.965221559 | -1.506191729 |
| YLR297W   | -2.948628911 | -1.579228432 | -2.428330155 |
| YLR298C   | -0.44597397  | 0.025689299  | -0.559267622 |
| YLR299C-A |              |              |              |
| YLR299W   | -3.141855502 | -0.106735404 | -2.428896126 |
| YLR300W   | -4.42656123  | 0.025068136  | -3.838521112 |
| YLR301W   |              |              |              |
| YLR302C   |              |              |              |
| YLR303W   | 1.110397189  | 0.157171891  | 1.530588966  |
| YLR304C   | 1.346715514  | -1.821798281 | 1.381336628  |
| YLR305C   | -0.947616902 | 0.472316399  | -1.161393365 |
| YLR306W   | -1.244940606 | -1.245656099 | -1.307252952 |
| YLR307C-A |              |              |              |
| YLR307W   | -1.823012347 | -0.330619641 | -1.427931222 |
| YLR308W   | -2.704598204 | -0.157780059 | -1.804442273 |
| YLR309C   | -2.64373474  | 0.125068775  | -1.624873757 |
| YLR310C   | -1.087099516 | -4.731795665 | -0.582717009 |
| YLR311C   | -2.808380122 | -0.022998484 | -2.073778312 |
| YLR312C   | -3.775797083 | -1.24755364  | -2.565156252 |
| YLR312W-A | -0.052082977 | -1.434574268 | -0.034705478 |
| YLR313C   | -1.731408998 | -1.559697464 | -1.351449166 |
| YLR314C   | -0.228436159 | -0.219678274 | -0.269742663 |
| YLR315W   | -4.130110969 | -1.087529453 | -2.420031186 |
| YLR316C   | -0.00278025  | 0.935740671  | -0.00386836  |
| YLR317W   | -0.100506698 | 0.332066508  | -0.155161751 |

|           |              |              |              |
|-----------|--------------|--------------|--------------|
| YLR318W   | -2.174684516 | -0.064158228 | -2.007166318 |
| YLR319C   | -1.535988037 | 1.088581963  | -1.162272421 |
| YLR320W   | -2.146024616 | 0.495664729  | -1.447209559 |
| YLR321C   | 4.125160808  | 0.979682744  | 2.472355792  |
| YLR322W   | -4.22010593  | -1.507823612 | -0.658233158 |
| YLR323C   | 0.139063904  | 0.137545232  | 0.169564966  |
| YLR324W   | 0.100851898  | 0.989099456  | 0.110556271  |
| YLR325C   | -1.555015084 | -1.045370424 | -1.616637817 |
| YLR326W   | 0.549933595  | 0.043699273  | 0.654966465  |
| YLR327C   | -0.02168798  | -0.098260898 | -0.018090761 |
| YLR328W   | 0.032237364  | -0.857004004 | 0.03656459   |
| YLR329W   |              |              |              |
| YLR330W   | 0.241230308  | 0.778486624  | 0.231075411  |
| YLR331C   | 0.089635217  | 0.043355173  | 0.100016716  |
| YLR332W   |              |              |              |
| YLR333C   |              |              |              |
| YLR334C   | -0.331541285 | -0.002521982 | -0.28033975  |
| YLR335W   | 0.896753316  | 0.109972862  | 0.864365272  |
| YLR336C   | -0.330693121 | -0.077961303 | -0.297621181 |
| YLR337C   | -0.088692954 | 0.74796712   | -0.095240511 |
| YLR338W   | -3.1476121   | -0.559133269 | -2.875107537 |
| YLR339C   | -2.129432999 | -0.207916277 | -1.953961525 |
| YLR340W   | -1.397534946 | 0.092346452  | -1.207969276 |
| YLR341W   | 0.453936629  | 0.033638558  | 0.592336231  |
| YLR342W   | 9.800751557  | -0.003974228 | 3.653941904  |
| YLR342W-A |              |              |              |
| YLR343W   | -0.592364686 | 0.849216019  | -0.813949705 |
| YLR344W   | -0.25168317  | 0.245042446  | -0.301683026 |
| YLR345W   | -1.364088975 | -0.017738851 | -1.640252097 |
| YLR346C   | -0.060000177 | 1.143492989  | -0.055033595 |
| YLR347C   | 0.661783681  | -0.021589623 | 0.570140807  |
| YLR347W-A |              |              |              |
| YLR348C   | -0.146540608 | -0.182858028 | -0.188479996 |
| YLR349W   | -0.043084742 | 0.607983374  | -0.046613608 |
| YLR350W   | 0.26905965   | -0.005221918 | 0.327134055  |
| YLR351C   | -0.080887698 | 0.336827994  | -0.087561249 |
| YLR352W   | -0.040276587 | -0.12074169  | -0.052699439 |
| YLR353W   | -0.92665449  | -0.061777804 | -1.355685008 |
| YLR354C   | 0.08853413   | 0.884824535  | 0.102823671  |
| YLR355C   | 0.10777613   | 1.351927185  | 0.145944722  |
| YLR356W   | 0.069384961  | -0.039354037 | 0.070986073  |
| YLR357W   | 1.331662421  | 0.989187645  | 1.288976954  |
| YLR358C   | 1.954230316  | 0.613187707  | 1.58614911   |
| YLR359W   | -0.016648521 | -0.074780407 | -0.017019764 |
| YLR360W   | -0.033962571 | -0.048533179 | -0.041415962 |
| YLR361C   | -0.286715321 | -1.263586684 | -0.288914989 |
| YLR361C-A |              |              |              |
| YLR362W   | -0.004785209 | 0.109265362  | -0.006610185 |
| YLR363C   | -0.882279145 | -0.307415266 | -0.929409012 |
| YLR363W-A |              |              |              |
| YLR364C-A |              |              |              |
| YLR364W   | -0.449450693 | -1.276978655 | -0.439519957 |
| YLR365W   | -0.15969716  | -0.123391385 | -0.157748452 |

|           |              |              |              |
|-----------|--------------|--------------|--------------|
| YLR366W   | 0.357796917  | -0.009620671 | 0.277798823  |
| YLR367W   | -0.19036824  | -0.748874403 | -0.254001656 |
| YLR368W   | -0.095347621 | 0.086283663  | -0.08902232  |
| YLR369W   | -0.040763922 | 0.002623146  | -0.05325295  |
| YLR370C   | -1.427308568 | -3.950834243 | -1.646226305 |
| YLR371W   | -0.183225477 | 0.401364887  | -0.169292299 |
| YLR372W   | -0.397418575 | 0.156658192  | -0.265361953 |
| YLR373C   | -9.888599767 | -3.413090659 | -5.219969396 |
| YLR374C   | -4.239098505 | -3.032433293 | -4.06332594  |
| YLR375W   | 0.067424177  | -0.566313912 | 0.085564335  |
| YLR376C   | -0.079202595 | -0.308573304 | -0.11060588  |
| YLR377C   | -0.084404097 | -0.177969615 | -0.086818674 |
| YLR378C   | 0.061049763  | -0.057114135 | 0.075432091  |
| YLR379W   | 0.020665019  | -0.004503402 | 0.024139854  |
| YLR380W   | -0.055269229 | 0.043111998  | -0.066922328 |
| YLR381W   | 0.114937725  | -0.008765591 | 0.148359921  |
| YLR382C   | 0.324182623  | 0.000299432  | 0.408416753  |
| YLR383W   |              |              |              |
| YLR384C   | 0.028479894  | 0.035911651  | 0.039506335  |
| YLR385C   | -0.113279994 | -0.090462942 | -0.103075209 |
| YLR386W   | -0.208934949 | 0.025058721  | -0.281785801 |
| YLR387C   | -0.141236473 | -0.030359294 | -0.13415099  |
| YLR388W   | 1.304445442  | 4.465597701  | 0.649281924  |
| YLR389C   | -0.118586423 | -0.187939563 | -0.118822088 |
| YLR390W   | 0.245682986  | -0.229815702 | 0.251439637  |
| YLR390W-A | 0.039230605  | -0.151446711 | 0.046682473  |
| YLR391W   | -0.097332585 | 0.01003878   | -0.078706475 |
| YLR392C   | 0.13980078   | -0.09739226  | 0.164846033  |
| YLR393W   | -0.851773843 | 0.043413345  | -1.059098827 |
| YLR394W   | -0.106329689 | -0.105177323 | -0.117900859 |
| YLR395C   | 0.426010558  | -1.474051031 | 0.540864231  |
| YLR396C   | -0.029832327 | -0.154730552 | -0.036140779 |
| YLR397C   | -1.139046337 | -0.013329826 | -1.142582493 |
| YLR398C   | 0.117346534  | 0.047012302  | 0.1642977    |
| YLR399C   | -0.930445493 | 0.074804108  | -0.952926638 |
| YLR399W-A |              |              |              |
| YLR400W   | -0.237460097 | 0.034200918  | -0.280835543 |
| YLR401C   | -0.012508189 | 0.089179966  | -0.017557225 |
| YLR402W   | 2.977824676  | -0.047585751 | 2.210339099  |
| YLR403W   | 2.591546685  | -0.313318975 | 1.402682686  |
| YLR404W   | -0.212998438 | 0.290449611  | -0.267810587 |
| YLR405W   | 0.013653061  | 0.033342203  | 0.017539144  |
| YLR406C   | 2.254813792  | -0.030378133 | 1.547503924  |
| YLR406C-A |              |              |              |
| YLR407W   | 1.908426106  | 0.6703214    | 1.774643498  |
| YLR408C   | -0.09876263  | 0.012640829  | -0.101164071 |
| YLR409C   | -0.402457788 | -0.121542612 | -0.374276479 |
| YLR410W   | -0.251497792 | -0.420185227 | -0.335330284 |
| YLR411W   |              |              |              |
| YLR412C-A |              |              |              |
| YLR412W   | -1.18150529  | -0.033398563 | -1.700268614 |
| YLR413W   | -0.883615083 | 0.547919852  | -0.993339018 |
| YLR414C   | 0.32748305   | 1.103108138  | 0.414450599  |

|           |              |              |              |
|-----------|--------------|--------------|--------------|
| YLR415C   | -0.172739129 | 0.03688527   | -0.24112737  |
| YLR416C   | 8.53E-06     | -0.128328728 | 8.75E-06     |
| YLR417W   | 0.070025986  | 0.019090004  | 0.08715134   |
| YLR418C   | -0.018350282 | -1.762946433 | -0.013442728 |
| YLR419W   |              |              |              |
| YLR420W   | -0.023830394 | 0.80068922   | -0.024260481 |
| YLR421C   | 1.627377355  | 0.606272248  | 1.572817009  |
| YLR422W   | 0.03296685   | -1.343900442 | 0.021738905  |
| YLR423C   | -0.399068158 | -0.249336728 | -0.373423754 |
| YLR424W   | -0.081718573 | 1.451459639  | -0.062365803 |
| YLR425W   | 0.654218745  | -0.062775913 | 0.702010512  |
| YLR426W   | 0.322407411  | 0.05355347   | 0.380276065  |
| YLR427W   | 0.488773739  | -0.047831449 | 0.518073062  |
| YLR428C   | -1.832391673 | -0.057508606 | -1.409232258 |
| YLR429W   | 0.096225958  | -0.934355309 | 0.096719101  |
| YLR430W   | 0.982316764  | 0.014232869  | 1.23927767   |
| YLR431C   | -0.113754931 | -1.029001873 | -0.142813273 |
| YLR432W   | 0.025564976  | 1.047944986  | 0.025874936  |
| YLR433C   | 2.513860361  | 0.371420814  | 1.922307568  |
| YLR434C   | 0.029010133  | -1.289541918 | 0.029195001  |
| YLR435W   | 0.701385181  | 0.082277887  | 0.680467653  |
| YLR436C   | 0.428620937  | 0.066911347  | 0.34429228   |
| YLR437C   | 0.007640853  | -0.008674663 | 0.007601061  |
| YLR437C-A |              |              |              |
| YLR438C-A | -0.029853371 | -0.364732824 | -0.026041547 |
| YLR438W   | -0.000663635 | -1.159021252 | -0.000716261 |
| YLR439W   | 2.060860621  | -0.113702669 | 1.834227953  |
| YLR440C   | 0.020018539  | -1.973588049 | 0.019155829  |
| YLR441C   | 5.552912947  | -0.230500908 | 2.918629358  |
| YLR442C   | 0.020194201  | 0.04768525   | 0.029611242  |
| YLR443W   | 0.025444629  | -0.438966728 | 0.037601204  |
| YLR444C   | 0.17859593   | 0.104820868  | 0.109697956  |
| YLR445W   | 0.029232832  | -0.829510664 | 0.023974933  |
| YLR446W   | 0.024807496  | -0.09706607  | 0.023150454  |
| YLR447C   | -2.886696527 | -3.515290731 | -2.339968415 |
| YLR448W   | 0.233236115  | 0.999918142  | 0.084364228  |
| YLR449W   | -0.003511123 | -0.316002043 | -0.003878664 |
| YLR450W   | 0.062075823  | -0.153572737 | 0.056913386  |
| YLR451W   | 1.404719364  | 1.298605492  | 1.199239728  |
| YLR452C   | 0.823266673  | -2.071768834 | 0.679652674  |
| YLR453C   | -0.055527241 | -1.910894403 | -0.055775434 |
| YLR454W   | -1.823307406 | 0.213549838  | -2.025417127 |
| YLR455W   | 3.199805863  | 0.225423902  | 2.831052835  |
| YLR456W   | -0.169101909 | 0.0201326    | -0.196506447 |
| YLR457C   | -0.001685898 | 0.043005074  | -0.002063835 |
| YLR458W   | 0.008461507  | -0.731964795 | 0.010689158  |
| YLR459W   | -0.005406969 | -0.142993264 | -0.006132487 |
| YLR460C   | -0.000744182 | -0.001308488 | -0.000864379 |
| YLR461W   | -0.05275271  | 0.030923121  | -0.063191463 |
| YLR462W   |              |              |              |
| YLR463C   |              |              |              |
| YLR464W   |              |              |              |
| YLR465C   |              |              |              |



|           |              |              |              |
|-----------|--------------|--------------|--------------|
| YLR466C-A |              |              |              |
| YLR466C-B |              |              |              |
| YLR466W   |              |              |              |
| YLR467C-A |              |              |              |
| YLR467W   |              |              |              |
| YML001W   | 0.96251383   | 2.01939638   | 1.162345782  |
| YML002W   | 0.094581784  | 0.001335885  | 0.071238858  |
| YML003W   | -0.002389373 | 0.050636828  | -0.002948852 |
| YML004C   | -0.002551594 | 0.03158311   | -0.002695312 |
| YML005W   | -0.341124635 | -0.183807986 | -0.501523679 |
| YML006C   | 2.263177041  | -0.008655664 | 1.764920365  |
| YML007C-A |              |              |              |
| YML007W   | -3.157784137 | -0.292524546 | -2.010572616 |
| YML008C   | 0.272025123  | -0.019302408 | 0.290564642  |
| YML009C   | 0.048953962  | 0.139501497  | 0.066325421  |
| YML009C-A |              |              |              |
| YML009W-B |              |              |              |
| YML010C-B | 1.328012711  | -0.023261368 | 1.275774753  |
| YML010W   | 3.22286221   | 0.2619574    | 2.418766292  |
| YML010W-A | -1.306186422 | 1.67920974   | -1.196970145 |
| YML011C   | 0.568930763  | -0.002539838 | 0.787986907  |
| YML012C-A |              |              |              |
| YML012W   | -0.261661135 | -0.072397954 | -0.242164993 |
| YML013C-A | 0.226506012  | -1.315819163 | 0.214975334  |
| YML013W   | -0.067095389 | -0.893698341 | -0.06579472  |
| YML014W   | -0.394757812 | -1.506776516 | -0.442571261 |
| YML015C   | -1.802127201 | -0.884658892 | -2.293746825 |
| YML016C   | 0.158990482  | 0.242325547  | 0.152055322  |
| YML017W   | -7.026756309 | -4.556172911 | -7.961525195 |
| YML018C   | -0.048805182 | -0.556432484 | -0.060568719 |
| YML019W   | -0.019897711 | 0.045540131  | -0.027705851 |
| YML020W   | 0.196469371  | 0.044586034  | 0.246868761  |
| YML021C   | 0.019375987  | -0.078392383 | 0.025298494  |
| YML022W   | 0.142585662  | -0.211546592 | 0.154908756  |
| YML023C   | -0.001115881 | -0.019087396 | -0.001553618 |
| YML024W   | 5.710164794  | 3.218440298  | 2.406684694  |
| YML025C   | -0.669296245 | 0.005748928  | -0.67034451  |
| YML026C   | 3.191299761  | 4.221178938  | 1.674219139  |
| YML027W   | -1.409267321 | -0.131649577 | -1.606594494 |
| YML028W   | 0.081011851  | 0.874238952  | 0.117328794  |
| YML029W   | 0.016170218  | -0.056624948 | 0.022228065  |
| YML030W   | -0.496879472 | 0.684541447  | -0.658166298 |
| YML031C-A |              |              |              |
| YML031W   | 4.196128626  | 1.187878348  | 0.962250371  |
| YML032C   | -0.058770254 | 0.103003344  | -0.050461977 |
| YML033W   | 0.698383789  | 1.594633129  | 0.78758236   |
| YML034C-A |              |              |              |
| YML034W   | -0.032632527 | 0.047965991  | -0.036949853 |
| YML035C   | -0.446785163 | -0.041077221 | -0.410352003 |
| YML035C-A | -0.007130599 | -0.046936985 | -0.007320323 |
| YML036W   | -0.847944249 | -0.075527354 | -0.816467033 |
| YML037C   | -1.342046923 | 0.005880617  | -1.441737376 |
| YML038C   | 0.18835302   | -0.229875005 | 0.176409084  |

|           |              |              |              |
|-----------|--------------|--------------|--------------|
| YML041C   | 0.676580895  | 0.054963337  | 0.669397001  |
| YML042W   | -0.065827905 | 0.050589262  | -0.081808764 |
| YML043C   | -0.142987092 | -0.325757041 | -0.126808355 |
| YML046W   | -0.497000107 | -0.186298663 | -0.486227085 |
| YML047C   | 0.151096228  | 0.07427219   | 0.203033681  |
| YML047W-A |              |              |              |
| YML048W   | -0.1811394   | 0.034893661  | -0.189693642 |
| YML048W-A | -0.048465983 | -0.306645197 | -0.044583363 |
| YML049C   | -0.623127293 | -0.20473623  | -0.516353802 |
| YML050W   | -0.621830154 | -0.038686997 | -0.719830321 |
| YML051W   | 0.72729014   | 0.004991065  | 0.63226598   |
| YML052W   | 0.119488715  | -0.000176617 | 0.121191176  |
| YML053C   | 0.069091837  | 0.056284462  | 0.086005208  |
| YML054C   | 0.106820757  | 0.0487046    | 0.120897079  |
| YML054C-A |              |              |              |
| YML055W   | -0.072967934 | 0.172048783  | -0.071549595 |
| YML056C   |              |              |              |
| YML057C-A |              |              |              |
| YML057W   | 0.015675167  | 0.367441545  | 0.02218297   |
| YML058C-A | -0.010339758 | 0.629687504  | -0.011196354 |
| YML058W   | 0.235428502  | 0.077246468  | 0.236178498  |
| YML058W-A |              |              |              |
| YML059C   | -0.03802608  | -0.00873617  | -0.033347214 |
| YML060W   | -0.281209466 | 0.092625203  | -0.261603433 |
| YML061C   | 0.067424477  | -1.718694276 | 0.05647513   |
| YML062C   | 0.302109312  | -0.004330488 | 0.399036984  |
| YML063W   | 8.294562435  | -0.00084351  | 2.625399539  |
| YML064C   | -0.066865506 | 0.266873168  | -0.071565013 |
| YML065W   | -0.215125785 | 0.084379787  | -0.197994854 |
| YML066C   | -0.966417785 | -0.051218659 | -0.995269847 |
| YML067C   | -0.420768241 | -0.383838527 | -0.544711774 |
| YML068W   | 0.058363542  | -0.107103772 | 0.081473165  |
| YML069W   | 1.393583062  | -0.786163741 | 1.268351994  |
| YML070W   | -0.654148266 | -0.003815872 | -0.678991903 |
| YML071C   | 0.028516674  | 0.12860416   | 0.038658712  |
| YML072C   | 0.018013536  | 0.656668591  | 0.022890057  |
| YML073C   | 3.643454916  | 0.969133515  | 1.10860879   |
| YML074C   | 0.108187138  | 1.517456948  | 0.105447821  |
| YML075C   | 0.054500746  | 0.585406298  | 0.061436545  |
| YML076C   | 0.560295856  | -0.253486355 | 0.466723529  |
| YML077W   | 0.675986811  | -1.103874554 | 0.747314504  |
| YML078W   | 0.112332705  | -0.265188577 | 0.113306346  |
| YML079W   | 0.008393071  |              | 0.00642069   |
| YML080W   | -0.024665592 | 0.076648011  | -0.017700335 |
| YML081C-A | -1.281500054 | -0.035523508 | -1.778731294 |
| YML081W   | 0.567859015  | 0.044814807  | 0.453664182  |
| YML082W   | 0.323416895  | 0.161015313  | 0.240197674  |
| YML083C   | -0.061743946 | -0.418606035 | -0.076174517 |
| YML084W   | -0.005487377 | 0.813455828  | -0.006074421 |
| YML085C   | -2.295567464 | 1.043984161  | -0.747733544 |
| YML086C   | -0.286004012 | 0.259170141  | -0.358774306 |
| YML087C   | 0.01831412   | 0.18500659   | 0.024713813  |
| YML088W   | -0.010183386 | 0.030782453  | -0.010853471 |

|           |              |              |              |
|-----------|--------------|--------------|--------------|
| YML089C   | 0.046027505  | -1.012623631 | 0.042945014  |
| YML090W   | -0.005959498 | -0.524769471 | -0.007965366 |
| YML091C   | 0.596183065  | -2.073617265 | 0.666050989  |
| YML092C   |              |              |              |
| YML093W   | -2.521186612 | -2.893117698 | -1.650786045 |
| YML094C-A |              |              |              |
| YML094W   | -0.00662841  | 0.018992707  | -0.007465636 |
| YML095C   | 0.240038211  | 0.003156639  | 0.268680778  |
| YML095C-A | -0.012991787 | -0.03729149  | -0.016698147 |
| YML096W   | -0.042040485 | 1.184573887  | -0.044726978 |
| YML097C   | 0.014783684  | -1.240164515 | 0.017057417  |
| YML098W   | -2.01399028  | 0.002020696  | -1.830915569 |
| YML099C   | 3.523648718  | -2.022995662 | 2.68374524   |
| YML099W-A |              |              |              |
| YML100W   | 0.060929054  | 0.273715894  | 0.084216964  |
| YML100W-A | -0.024945468 | -0.015237224 | -0.024760106 |
| YML101C   | -0.020620262 | 0.043609765  | -0.026229238 |
| YML101C-A |              |              |              |
| YML102C-A | -0.675912081 | 1.112604149  | -0.727460783 |
| YML102W   | -0.24287756  | 0.852398998  | -0.293128864 |
| YML103C   | 1.356984413  | 0.185487546  | 1.311639101  |
| YML104C   | 0.237825862  | -0.237233247 | 0.256532342  |
| YML105C   | 0.365456948  | 0.827196698  | 0.360138334  |
| YML106W   | -3.725117146 | -0.695367612 | -2.316117755 |
| YML107C   | -1.844510926 | -2.520010873 | -1.392992172 |
| YML108W   | -0.130482739 | -0.047106188 | -0.132052588 |
| YML109W   | -0.838928005 | -0.221078501 | -0.798888686 |
| YML110C   | 0.759068496  | 1.009308567  | 0.590179972  |
| YML111W   | -0.053643524 | -0.030029596 | -0.054114916 |
| YML112W   | 0.240645497  | 0.034607896  | 0.239168291  |
| YML113W   | -0.178508764 | -0.13890008  | -0.124649708 |
| YML114C   | 0.01425223   | -4.63E-05    | 0.010564405  |
| YML115C   | -0.260485212 | -1.142725537 | -0.217033367 |
| YML116W   | -0.004791023 | 0.647555845  | -0.007172129 |
| YML116W-A |              |              |              |
| YML117W   | 5.470170211  | 0.860776829  | 3.851198572  |
| YML117W-A | 0.573683744  | 0.586141309  | 0.518766671  |
| YML118W   | -0.03664536  | -0.011988518 | -0.038478308 |
| YML119W   | 0.246692401  | 0.077383543  | 0.258537241  |
| YML120C   | 1.557685327  | 3.473590749  | 1.114436893  |
| YML121W   | 1.247731128  | 2.26415943   | 0.887876573  |
| YML122C   | -2.129079575 | -0.130286351 | -1.092470237 |
| YML123C   | -0.906005741 | 0.13026407   | -0.57805217  |
| YML124C   | 0.377473682  | 0.160748061  | 0.356039525  |
| YML125C   | 0.070846533  | 0.005140568  | 0.074912394  |
| YML126C   | 0.048314061  | -0.197508484 | 0.058356051  |
| YML127W   | 7.445079617  | 1.441099217  | 2.196761621  |
| YML128C   | 0.119146267  | 0.021734975  | 0.117870201  |
| YML129C   | 0.594049955  | -0.003128008 | 0.58242497   |
| YML130C   | 0.033512218  | 0.838666447  | 0.038344104  |
| YML131W   | 0.023037461  | 0.023839365  | 0.025248347  |
| YML132W   |              |              |              |
| YML133C   |              |              |              |

|           |              |              |              |
|-----------|--------------|--------------|--------------|
| YML133W-A |              |              |              |
| YML133W-B |              |              |              |
| YMR001C   | -2.636717825 | -0.098405207 | -2.208595391 |
| YMR001C-A |              |              |              |
| YMR002W   | -0.145915046 | -1.696092749 | -0.121399333 |
| YMR003W   | 0.007872587  | -1.004988943 | 0.002996737  |
| YMR004W   | -2.74292621  | -0.780873885 | -2.973724124 |
| YMR005W   | 0.065929572  | -0.528673743 | 0.063719949  |
| YMR006C   | 0.000722659  | -0.165278673 | 0.000916338  |
| YMR007W   | 0.084010117  | 0.178090836  | 0.132433989  |
| YMR008C   | 0.09104255   | -0.049143132 | 0.110800177  |
| YMR009W   | -0.75638056  | -0.064496291 | -1.049318457 |
| YMR010W   | -0.077224316 | -2.161046448 | -0.082091629 |
| YMR011W   | 0.044743297  | -0.006680479 | 0.055947978  |
| YMR012W   | 0.080396569  | 0.020831025  | 0.097898191  |
| YMR013C   | 0.024218804  | -0.301374993 | 0.020028081  |
| YMR013C-A |              |              |              |
| YMR013W-A |              |              |              |
| YMR014W   |              |              |              |
| YMR015C   | -4.836194453 | 0.008835247  | -3.969101603 |
| YMR016C   | -2.58166025  | -1.085310657 | -1.698809553 |
| YMR017W   | 0.186844673  | -0.969922204 | 0.235299769  |
| YMR018W   | -0.92505607  | 0.307496037  | -0.88542068  |
| YMR019W   | 0.176692644  | 0.026745655  | 0.22887061   |
| YMR020W   | 0.01994549   | 0.272998234  | 0.025019401  |
| YMR021C   | 1.336543231  | -4.092788868 | 1.416628041  |
| YMR022W   | 0.909607955  | 0.151708274  | 1.001467525  |
| YMR023C   | -0.00533224  | 1.088286391  | -0.007253502 |
| YMR024W   |              |              |              |
| YMR025W   | 0.206189493  | -0.05389576  | 0.19708012   |
| YMR026C   | 0.01031104   | -0.024354551 | 0.011290843  |
| YMR027W   | -0.199900285 | -0.674837776 | -0.154874767 |
| YMR028W   | 0.011348343  | 0.010458286  | 0.011732677  |
| YMR029C   | 0.090739492  | 0.016401649  | 0.115643767  |
| YMR030W   | -0.052366018 | 0.115723522  | -0.061030088 |
| YMR030W-A |              |              |              |
| YMR031C   | -0.690737815 | -1.516176023 | -0.837631544 |
| YMR031W-A | 0.105465176  | -0.149089325 | 0.132291205  |
| YMR032W   |              |              |              |
| YMR033W   | 4.713546577  | 0.772917485  | 2.269080055  |
| YMR034C   | -0.186286267 | 0.092662424  | -0.282100642 |
| YMR035W   | -0.383547162 | -0.180901132 | -0.478743731 |
| YMR036C   | -2.580511508 | 0.034466731  | -1.653991334 |
| YMR037C   | 2.470227683  | -0.613529906 | 2.466016524  |
| YMR038C   | -0.178480669 | 0.161386126  | -0.153410078 |
| YMR039C   | 0.093480476  | 0.624048056  | 0.122371715  |
| YMR040W   | -0.062375449 | 0.04545535   | -0.056373623 |
| YMR041C   | -0.194172606 | -0.002074725 | -0.232175172 |
| YMR042W   | 0.081844325  | -0.176581153 | 0.068159792  |
| YMR043W   | -0.803826009 | -0.046805951 | -0.745643416 |
| YMR044W   | -0.005622217 | -2.560492669 | -0.004467295 |
| YMR046W-A |              |              |              |
| YMR047C   | -0.129546305 | -1.003969547 | -0.188108143 |

|           |              |              |              |
|-----------|--------------|--------------|--------------|
| YMR048W   | 0.006329763  | 0.018093227  | 0.007836815  |
| YMR049C   | -0.455144292 | 0.343724142  | -0.445067754 |
| YMR052C-A | 0.0580947    | -0.043768654 | 0.04683035   |
| YMR052W   | 0.055985673  | 0.045005486  | 0.072701357  |
| YMR053C   | -14.01245812 | -17.52962595 | -3.451595404 |
| YMR054W   | -3.363115624 | -1.952936456 | -2.619337265 |
| YMR055C   | 0.030608363  | -0.348137508 | 0.040683738  |
| YMR056C   | -2.232070278 | -0.098222568 | -1.86886135  |
| YMR057C   | 0.19145105   | 1.056067523  | 0.236049242  |
| YMR058W   | 0.494456149  | 0.051491867  | 0.521907972  |
| YMR059W   |              |              |              |
| YMR060C   | -0.659440928 | -0.420894057 | -0.856073513 |
| YMR061W   | -0.484109353 | 0.11716091   | -0.165494498 |
| YMR062C   | -0.006042748 | 1.177384339  | -0.00686387  |
| YMR063W   | -0.034156725 | -1.58946983  | -0.023551997 |
| YMR064W   | -0.801466738 | -0.64170125  | -0.907868372 |
| YMR065W   | 0.176650918  | 0.322949086  | 0.149494735  |
| YMR066W   | -0.02624553  | 0.01974903   | -0.026356746 |
| YMR067C   | 0.03698344   | 0.06047491   | 0.039842847  |
| YMR068W   | -0.22329856  | 0.913188273  | -0.217466209 |
| YMR069W   | -0.81453415  | -0.01730423  | -1.042630363 |
| YMR070W   | 0.089818523  | 0.07884915   | 0.088391942  |
| YMR071C   | 0.1693018    | -0.002632505 | 0.199485885  |
| YMR072W   | 3.029457954  | -0.009092634 | 2.882119804  |
| YMR073C   | 0.029139789  | -1.562664219 | 0.02928376   |
| YMR074C   | -0.005019059 | 0.019936279  | -0.004153862 |
| YMR075C-A | 4.84268445   | -0.456152749 | 3.796047742  |
| YMR075W   | 1.878362325  | 0.128666421  | 2.428784956  |
| YMR076C   | -0.071489426 | -1.20662229  | -0.080564965 |
| YMR077C   | 0.03845917   | -1.171086255 | 0.044313514  |
| YMR078C   | -0.225270011 | -0.211011072 | -0.224006268 |
| YMR079W   | -5.271332781 | -0.099416304 | -3.273070762 |
| YMR080C   | -0.948769752 | -0.429486932 | -1.414355381 |
| YMR081C   | 3.447577148  | 3.523921517  | 2.288247387  |
| YMR082C   | 0.043515147  | 0.134292438  | 0.055322474  |
| YMR083W   | 0.214797236  | -0.337330259 | 0.204680902  |
| YMR084W   | 0.093875921  | -0.035899169 | 0.09144199   |
| YMR085W   | 0.07355908   | 1.380068268  | 0.074131752  |
| YMR086C-A | 0.234645471  | 0.261447634  | 0.294681239  |
| YMR086W   | -0.01874872  | -1.520943854 | -0.020482447 |
| YMR087W   | -0.306747242 | -0.00760475  | -0.301914747 |
| YMR088C   | 2.603373646  | -0.010650809 | 2.054370521  |
| YMR089C   | 0.178491761  | 1.590172199  | 0.141226867  |
| YMR090W   | 0.823437846  | -0.005532621 | 0.919102143  |
| YMR091C   | 2.775452841  | 1.66295685   | 0.589305131  |
| YMR092C   | -0.312056526 | 0.697252544  | -0.388483931 |
| YMR093W   | 1.754169745  | -0.748265385 | 1.163441711  |
| YMR094W   | -0.027267892 | 0.88388493   | -0.038264659 |
| YMR095C   | -0.818980645 | -0.241755644 | -0.927976459 |
| YMR096W   | 0.092644421  | -0.035179546 | 0.132978886  |
| YMR097C   | -0.043927734 | -0.369226987 | -0.052972471 |
| YMR098C   | -0.563258298 | -2.712533411 | -0.34181901  |
| YMR099C   | -0.074551485 | -0.028579308 | -0.090298312 |

|           |              |              |              |
|-----------|--------------|--------------|--------------|
| YMR100W   | 3.051041029  | 0.392543905  | 2.978545768  |
| YMR101C   | 0.058634636  | -1.470017762 | 0.072740713  |
| YMR102C   | 0.105384655  | 1.483876997  | 0.0900593    |
| YMR103C   | 0.080254997  | 0.007776688  | 0.076418101  |
| YMR104C   | 0.13877155   | 0.13018202   | 0.131950013  |
| YMR105C   | -0.024319428 | 0.00985719   | -0.019712245 |
| YMR105W-A |              |              |              |
| YMR106C   | -0.042747696 | 0.593210012  | -0.056053351 |
| YMR107W   | 0.213959874  | 0.233591887  | 0.252003165  |
| YMR108W   | 0.726603596  | 1.40602052   | 0.836969785  |
| YMR109W   | -0.015247285 | -0.278372479 | -0.013581003 |
| YMR110C   | -0.977948724 | -0.064136696 | -1.045190873 |
| YMR111C   | -0.075577228 | 0.023075357  | -0.108296034 |
| YMR112C   | 0.030522754  | 0.561812053  | 0.044421577  |
| YMR113W   | 0.12914987   | -0.007324994 | 0.119258883  |
| YMR114C   | -0.148655923 | -0.285587445 | -0.158773457 |
| YMR115W   | -0.015810783 | 0.055086497  | -0.016146049 |
| YMR116C   | -0.305419233 | -0.158692929 | -0.268679426 |
| YMR117C   | -0.135815236 | -0.700892681 | -0.104282756 |
| YMR118C   | 0.028157734  | -0.988901593 | 0.029302209  |
| YMR119W   | -0.083138983 | -0.333753354 | -0.066550593 |
| YMR119W-A | -0.125113984 | -2.03419095  | -0.105277349 |
| YMR120C   | -0.586552921 | 0.098920223  | -0.738502539 |
| YMR121C   | -0.048102523 | 0.160113499  | -0.060810311 |
| YMR122C   | 0.96581475   | -0.006988481 | 0.995651599  |
| YMR122W-A |              |              |              |
| YMR123W   | -0.338098886 | 0.029534701  | -0.356524706 |
| YMR124W   | 0.015861627  | -0.296229227 | 0.020630801  |
| YMR125W   | -0.693203405 | -1.237704873 | -0.8998592   |
| YMR126C   | -0.189967526 | 0.15107152   | -0.173940323 |
| YMR127C   | 0.046033552  | -0.09044302  | 0.031009723  |
| YMR128W   | 0.475209258  | 0.007578638  | 0.47907458   |
| YMR129W   | 0.857970462  | -0.034781391 | 0.799377116  |
| YMR130W   | -0.072692776 | 0.402998334  | -0.067440599 |
| YMR131C   | -0.152569968 | 0.181961116  | -0.117686768 |
| YMR132C   | -0.196977927 | 0.48040573   | -0.178620245 |
| YMR133W   | -0.01335196  | 1.167091903  | -0.014352638 |
| YMR134W   | 0.126861182  | 0.017974601  | 0.171982282  |
| YMR135C   | -1.228459326 | -0.037224208 | -1.262482627 |
| YMR135W-A | -0.963144614 | -2.512942977 | -0.915732653 |
| YMR136W   | 0.225884676  | 0.004938124  | 0.196733812  |
| YMR137C   | -0.055743447 | -1.475283772 | -0.050318398 |
| YMR138W   | 0.156718555  | 2.06997809   | 0.140389256  |
| YMR139W   | 0.855823527  | 0.817697656  | 0.995169118  |
| YMR140W   | 1.129822036  | 0.076190758  | 1.177979816  |
| YMR141C   | 0.193013774  | -0.240663537 | 0.180977268  |
| YMR141W-A |              |              |              |
| YMR142C   |              | 9.61326897   |              |
| YMR143W   | 6.344645397  | 0.355609385  | 2.227286009  |
| YMR144W   | -0.192122834 | 0.075416318  | -0.211876554 |
| YMR145C   | -0.261733183 | -0.329647482 | -0.230807028 |
| YMR146C   | -28.97210258 | -34.46680802 | -15.57980565 |
| YMR147W   | 0.012011768  | 0.114750749  | 0.017829814  |

|           |              |              |              |
|-----------|--------------|--------------|--------------|
| YMR148W   | -0.097707508 | 0.119774924  | -0.113142695 |
| YMR149W   | -0.05399319  | 0.313829854  | -0.073200061 |
| YMR150C   | 0.07423218   | -0.059619165 | 0.113058929  |
| YMR151W   | -0.122613644 | 0.05347054   | -0.15616483  |
| YMR152W   | 0.183040134  | -0.379453368 | 0.225576717  |
| YMR153C-A | 0.033329897  | 0.165085584  | 0.049645618  |
| YMR153W   | -0.010109145 | -0.184395333 | -0.013831426 |
| YMR154C   | -1.87958835  | -0.028006969 | -2.399049181 |
| YMR155W   | -0.007850426 | -0.119177519 | -0.01049355  |
| YMR156C   | 0.1044974    | -0.014495948 | 0.095758444  |
| YMR157C   | 0.482997172  | -1.084887851 | 0.471843818  |
| YMR158C-A |              |              |              |
| YMR158C-B | 0.031726444  | -1.193263829 | 0.034919248  |
| YMR158W   | -1.212886095 | 0.112812783  | -1.351250993 |
| YMR158W-A | -0.58707702  | -0.567897783 | -0.630607073 |
| YMR158W-B |              |              |              |
| YMR159C   | -0.294176437 | -0.026307682 | -0.371153209 |
| YMR160W   | -0.030374734 | -0.041563882 | -0.042445906 |
| YMR161W   | -0.015820184 | -0.159138884 | -0.015999842 |
| YMR162C   | 0.526327959  | 2.357399361  | 0.612617848  |
| YMR163C   | -0.074926272 | 0.330490593  | -0.112140231 |
| YMR164C   | -0.444399566 | -1.584528446 | -0.450338155 |
| YMR165C   | -1.354188263 | -0.014927332 | -1.517493684 |
| YMR166C   | 2.158918728  | 0.272704918  | 2.00256571   |
| YMR167W   | 0.869276159  | -0.694447897 | 0.821387839  |
| YMR168C   | 0.2706023    | 0.017037575  | 0.247570262  |
| YMR169C   | 0.047404988  | -0.058382879 | 0.057952937  |
| YMR170C   | -0.015194663 | 0.131374532  | -0.013695635 |
| YMR171C   | -0.240412364 | -0.148696775 | -0.344655597 |
| YMR172C-A | -0.012925358 | 0.165099652  | -0.010826957 |
| YMR172W   | 0.003782678  | 0.104104528  | 0.004140932  |
| YMR173W   | -0.196837964 | -0.389959804 | -0.275203226 |
| YMR173W-A | -1.219354483 | -0.001319255 | -1.222107143 |
| YMR174C   | 0.680218887  | 0.077610933  | 1.142559002  |
| YMR175W   | 0.009787999  | 0.092025614  | 0.017757485  |
| YMR175W-A |              |              |              |
| YMR176W   | 0.014536662  | 0.00707856   | 0.017829638  |
| YMR177W   | -0.070471268 | -0.04598198  | -0.074279018 |
| YMR178W   | -0.0087885   | 0.023062971  | -0.009845049 |
| YMR179W   | -1.018104113 | -1.09914203  | -0.866952212 |
| YMR180C   | 0.068904119  | 0.008441556  | 0.071479105  |
| YMR181C   | -1.850647608 | 0.061399584  | -1.961522625 |
| YMR182C   | 3.659304766  | -0.048146354 | 2.088722837  |
| YMR182W-A |              |              |              |
| YMR183C   | 0.560948178  | -0.312643534 | 0.543382776  |
| YMR184W   | -0.005082604 | 0.049163747  | -0.004494925 |
| YMR185W   | 0.090815468  | 0.028878065  | 0.109102845  |
| YMR186W   | -2.503041105 | -0.051625405 | -2.299235046 |
| YMR187C   | 0.019938681  | -0.250045039 | 0.015787741  |
| YMR188C   | -0.027078908 | -0.041740185 | -0.026260536 |
| YMR189W   | -0.181373216 | -9.940930747 | -0.092136506 |
| YMR190C   | -1.026228467 | -0.478367622 | -1.004897032 |
| YMR191W   | -0.167151175 | -0.162339113 | -0.229087136 |

|           |              |              |              |
|-----------|--------------|--------------|--------------|
| YMR192W   | -0.22867242  | -0.210965035 | -0.210364206 |
| YMR193C-A | 0.094015277  | -0.046997225 | 0.096242391  |
| YMR193W   | 0.092256043  | -1.970550201 | 0.105389645  |
| YMR194C-A | -0.959686931 | -0.398205831 | -1.041290475 |
| YMR194C-B |              |              |              |
| YMR194W   | -1.858740668 | -0.112785238 | -2.648009727 |
| YMR195W   | 0.406221011  | -0.389577585 | 0.341433879  |
| YMR196W   | -0.012257395 | 0.195888562  | -0.011264691 |
| YMR197C   | -0.071879925 | 0.012483111  | -0.064791874 |
| YMR198W   | -3.854064033 | -0.676058981 | -3.615568764 |
| YMR199W   | 0.014651851  | 0.22287062   | 0.013326118  |
| YMR200W   | 0.704978135  | -0.838488382 | 0.679203379  |
| YMR201C   | 0.117986285  | -0.024062117 | 0.154216348  |
| YMR202W   | -1.947409707 | 0.162741836  | -1.920189872 |
| YMR203W   | 0.858453737  | 1.876939396  | 0.790880622  |
| YMR204C   | -0.02505364  | 0.001784261  | -0.025929527 |
| YMR205C   | 0.013028781  | -1.073998241 | 0.013799161  |
| YMR206W   | 0.163834699  | 1.170336493  | 0.218104001  |
| YMR207C   | -1.183642688 |              | -0.811176942 |
| YMR208W   | -0.196335845 | 0.252112092  | -0.216054144 |
| YMR209C   | 0.579656175  | 0.410419248  | 0.663737317  |
| YMR210W   | -0.738225643 | -0.055480558 | -0.743289617 |
| YMR211W   | 0.003959307  | -0.125583448 | 0.004865124  |
| YMR212C   |              |              |              |
| YMR213W   | -0.906288776 | -0.01675378  | -0.792347102 |
| YMR214W   | -6.704145209 | -2.971141082 | -3.308872342 |
| YMR215W   | 0.10822093   | 0.005029335  | 0.139633177  |
| YMR216C   | -1.374519004 | -1.085907088 | -0.763208759 |
| YMR217W   | -0.313013799 | -2.778306366 | -0.247030738 |
| YMR218C   | 0.152367417  | 0.115877154  | 0.149038001  |
| YMR219W   | -0.011415614 | -0.615471813 | -0.014858458 |
| YMR220W   | -0.858384805 | -0.406051031 | -0.822354251 |
| YMR221C   | -0.10928169  | -0.440174775 | -0.089908076 |
| YMR222C   | 0.021689866  | -0.525939341 | 0.020233567  |
| YMR223W   | -1.399689389 | -2.630387193 | -1.492259712 |
| YMR224C   | -1.632733714 | -0.476778048 | -1.604304723 |
| YMR225C   | -1.680280248 | -0.083774578 | -2.115148852 |
| YMR226C   | -0.202687289 | -0.244640771 | -0.180921913 |
| YMR227C   | 0.52625235   | 1.24561891   | 0.375603082  |
| YMR228W   | -0.024227499 | -0.114776445 | -0.032664435 |
| YMR229C   | 0.029845615  | -0.626672752 | 0.034312796  |
| YMR230W   | 2.876109735  | 0.227025848  | 1.668102609  |
| YMR230W-A |              |              |              |
| YMR231W   | -1.021188692 | -1.106828496 | -1.372037156 |
| YMR232W   | 0.030795678  | 1.032099096  | 0.045443793  |
| YMR233W   | -0.891978151 | 0.003843321  | -0.876609569 |
| YMR234W   | -0.086286781 | -0.366092071 | -0.090848736 |
| YMR235C   | -0.283460608 | 0.016617812  | -0.310492887 |
| YMR236W   | -0.059120569 | -0.361221482 | -0.062542991 |
| YMR237W   | -0.274730574 | -0.041968201 | -0.279739603 |
| YMR238W   | 0.194314354  | -1.432038905 | 0.2186895    |
| YMR239C   | 0.071508876  | 0.183183831  | 0.086442648  |
| YMR240C   | 0.588979241  | 0.817866582  | 0.600779275  |



|           |              |              |              |
|-----------|--------------|--------------|--------------|
| YMR241W   | -0.00011864  | -0.06766152  | -0.000149069 |
| YMR242C   | -1.149823271 | -1.977074356 | -0.447256127 |
| YMR242W-A |              |              |              |
| YMR243C   | 0.005924825  | 0.295495218  | 0.007952981  |
| YMR244C-A | -0.061453748 | -0.070126524 | -0.075697905 |
| YMR244W   | -0.078154006 | -0.948145141 | -0.087014769 |
| YMR245W   | -0.007602344 | -0.230020491 | -0.007358576 |
| YMR246W   | -0.078909493 | 0.146105515  | -0.088921559 |
| YMR247C   | -1.503137266 | -1.526804102 | -1.622994973 |
| YMR247W-A |              |              |              |
| YMR250W   | -0.253721447 | -0.112171934 | -0.261383328 |
| YMR251W   | -0.053728003 | 0.554908871  | -0.049253835 |
| YMR251W-A | 1.516497797  | 1.306337004  | 1.546201047  |
| YMR252C   | 0.00919932   | -0.629576033 | 0.011505423  |
| YMR253C   | 0.104278654  | 0.132086254  | 0.14964653   |
| YMR254C   | -0.046393921 | -0.025187196 | -0.051525912 |
| YMR255W   | -0.06570713  | 0.547908968  | -0.068635854 |
| YMR256C   | 0.060831068  | -0.067355715 | 0.054711019  |
| YMR257C   | -0.147737341 | -0.013500342 | -0.172276805 |
| YMR258C   |              |              |              |
| YMR259C   | 0.255724975  | 0.894683461  | 0.363227173  |
| YMR260C   | -6.219475369 | -8.261865805 | -8.364058189 |
| YMR261C   | -0.121677685 | -0.004217392 | -0.110809738 |
| YMR262W   | 0.734911106  | -0.102701685 | 0.758751785  |
| YMR263W   | -0.055525868 | 0.030663542  | -0.077346411 |
| YMR264W   | -0.014986716 | 0.002838184  | -0.028830848 |
| YMR265C   | -0.084666936 | 0.547266724  | -0.137976247 |
| YMR266W   | -7.17989423  | -8.840165499 | -2.470630907 |
| YMR267W   | 0.49634944   | 0.189941619  | 0.633331784  |
| YMR268C   | 0.022716864  | -0.823275235 | 0.033036074  |
| YMR269W   | 0.188636642  | -0.111932981 | 0.257252184  |
| YMR270C   | 0.159853474  | 0.095035693  | 0.209802896  |
| YMR271C   | 0.294086086  | -0.099733503 | 0.291146307  |
| YMR272C   | 0.016219394  | 1.949941268  | 0.016841977  |
| YMR272W-A |              |              |              |
| YMR272W-B |              |              |              |
| YMR273C   | -0.507011894 | 0.02525268   | -0.429197603 |
| YMR274C   | 0.030002953  | -0.019861694 | 0.048199505  |
| YMR275C   | 3.49777385   | 2.49557053   | 2.88729396   |
| YMR276W   | 0.04908916   | 0.003028167  | 0.062530589  |
| YMR277W   | -5.785104567 | -0.02760423  | -4.209127808 |
| YMR278W   | 0.056254409  | 0.31026238   | 0.079900999  |
| YMR279C   | -0.024630044 | -0.107439318 | -0.023479607 |
| YMR280C   | 0.010333253  | 0.017233576  | 0.011838986  |
| YMR281W   | 0.528590233  | -0.115792253 | 0.484899487  |
| YMR282C   | -0.034936095 | -0.144793824 | -0.038393519 |
| YMR283C   | 0.76170414   | -0.617018417 | 0.823124208  |
| YMR284W   | 0.889943912  | -0.094775394 | 0.90611515   |
| YMR285C   | 0.208584503  | 0.002749613  | 0.340096556  |
| YMR286W   | 1.005292122  | -0.046506749 | 1.269628627  |
| YMR287C   | 1.678837462  | 0.163854159  | 1.459185347  |
| YMR288W   | 0.71264672   | 0.723721699  | 0.937693345  |
| YMR289W   | 0.04643303   | 0.221637178  | 0.04912562   |

|           |              |              |              |
|-----------|--------------|--------------|--------------|
| YMR290C   | 0.119193135  | -0.031994215 | 0.094908993  |
| YMR290W-A | 0.218368234  | 1.285109677  | 0.25497906   |
| YMR291W   | 0.629172313  | 1.936498744  | 0.509245011  |
| YMR292W   | 1.750389518  | 1.482700115  | 1.612387551  |
| YMR293C   | -0.012430707 | 0.004997151  | -0.016187913 |
| YMR294W   | 0.064473009  | 0.164627014  | 0.075475334  |
| YMR294W-A | 0.709117556  | -0.252358394 | 0.706203006  |
| YMR295C   | 1.719042193  | 0.051969902  | 1.549351637  |
| YMR296C   | -11.03439229 | -7.011105244 | -4.97591259  |
| YMR297W   | 0.1476615    | -0.076622806 | 0.139353923  |
| YMR298W   | -0.129538245 | 0.058479227  | -0.175219362 |
| YMR299C   | -0.010560961 | 0.395790137  | -0.012760709 |
| YMR300C   | 0.138530309  | -0.070811765 | 0.169056587  |
| YMR301C   | -0.257618917 | -0.016134491 | -0.357784219 |
| YMR302C   | -0.081210803 | 0.013105106  | -0.07555702  |
| YMR303C   | 0.555096472  | 0.866526623  | 0.451766999  |
| YMR304C-A | 0.063851061  | 1.058094613  | 0.074188266  |
| YMR304W   | 0.571861902  | 0.02421215   | 0.452212423  |
| YMR305C   | -0.013601752 | -0.034237689 | -0.013347566 |
| YMR306C-A | 0.0112745    | -0.212516058 | 0.014225522  |
| YMR306W   | -0.819362565 | 0.002132149  | -0.97747455  |
| YMR307C-A |              |              |              |
| YMR307W   | 0.186180404  | 0.041890424  | 0.178271258  |
| YMR308C   | -0.837258683 | -0.021946695 | -0.999494576 |
| YMR309C   | -17.41168098 | -18.65391602 | -2.0442177   |
| YMR310C   | 1.514214214  | 1.199482893  | 1.636416951  |
| YMR311C   | 0.051607613  | 0.086876069  | 0.060896399  |
| YMR312W   | 1.354992347  | 0.021801     | 1.54999262   |
| YMR313C   | 0.133643559  | -0.519168586 | 0.147251688  |
| YMR314W   | 7.551067482  | 1.465546783  | 4.270520016  |
| YMR315W   | 0.106876555  | -0.242985569 | 0.115530792  |
| YMR315W-A |              |              |              |
| YMR316C-A | -0.129949601 | -0.028238259 | -0.114698644 |
| YMR316C-B | -0.028092428 | 0.367344626  | -0.022857831 |
| YMR316W   | 8.388959668  | 1.847119184  | 3.212253664  |
| YMR317W   | -1.310471128 | 0.194686299  | -1.408888752 |
| YMR318C   | 0.568448777  | -0.071452787 | 0.597921873  |
| YMR319C   | 1.734250627  | -1.350716355 | 1.611914226  |
| YMR320W   | 0.641313471  | -0.364043928 | 0.547843423  |
| YMR321C   |              |              |              |
| YMR322C   | -0.012520415 | -0.267001853 | -0.008747653 |
| YMR323W   |              |              |              |
| YMR324C   |              |              |              |
| YMR325W   |              |              |              |
| YMR326C   | 0.634966871  | -0.255599756 | 0.574350651  |
| YNL001W   | -0.552149673 | 0.02093884   | -0.695049991 |
| YNL002C   | 7.405862442  | 5.148594335  | 2.82706057   |
| YNL003C   | 0.112981998  | -0.304442736 | 0.14381156   |
| YNL004W   | -12.67082367 | -6.347940543 | -5.048217545 |
| YNL005C   | 0.097472061  | -0.106277226 | 0.120621106  |
| YNL006W   | -0.483304342 | -0.003206743 | -0.389274773 |
| YNL007C   | 0.250583461  | -0.986854974 | 0.336741171  |
| YNL008C   | -0.046167906 | -0.633451146 | -0.044495999 |

|           |              |              |              |
|-----------|--------------|--------------|--------------|
| YNL009W   | 0.19201289   | 0.043823161  | 0.192235554  |
| YNL010W   | 1.369027356  | 2.162707657  | 0.934742244  |
| YNL011C   | -0.006626739 | 0.274645024  | -0.006611285 |
| YNL012W   | -0.059784901 | -0.023330611 | -0.05815299  |
| YNL013C   | 0.115057314  | 0.801018016  | 0.12898045   |
| YNL014W   |              | -0.491406541 |              |
| YNL015W   | 0.054908158  | 0.115197042  | 0.064773429  |
| YNL016W   | 8.130585763  | 1.854933204  | 4.05499418   |
| YNL017C   |              |              |              |
| YNL018C   | -0.296659697 | -0.112572618 | -0.373045332 |
| YNL019C   |              |              |              |
| YNL020C   | -0.027942511 | 0.001776174  | -0.024055714 |
| YNL021W   | -2.555772125 | 0.637497731  | -2.283326881 |
| YNL022C   | -0.150303006 | 0.099101209  | -0.167343013 |
| YNL023C   | 0.367878485  | 0.003424353  | 0.225174203  |
| YNL024C   | 0.843427626  | 0.106943723  | 1.070146647  |
| YNL024C-A |              |              |              |
| YNL025C   | 0.353730379  | 1.019630118  | 0.349357838  |
| YNL026W   | -0.032667943 | 0.431636861  | -0.040830143 |
| YNL027W   | 1.915684293  | 0.479228355  | 2.171261632  |
| YNL028W   | 0.003501713  | 0.034405971  | 0.003559747  |
| YNL029C   | 0.069321014  | 0.54026268   | 0.07229967   |
| YNL030W   | -0.149505964 | -0.020942974 | -0.155418489 |
| YNL031C   | -2.807502835 | -2.329998933 | -0.932141784 |
| YNL032W   | -0.013209957 | -0.950576512 | -0.010348134 |
| YNL033W   |              |              |              |
| YNL034W   | -0.139629423 | 0.047423132  | -0.145412781 |
| YNL035C   | 0.288653317  | -0.035470714 | 0.351888668  |
| YNL036W   |              |              |              |
| YNL037C   | 2.773101732  | 6.297459809  | 1.177787201  |
| YNL038W   | 0.07958105   | -0.006633452 | 0.094855001  |
| YNL039W   | -0.696619451 | -0.007107712 | -0.687640344 |
| YNL040W   | 0.198692144  | 2.591817373  | 0.163601946  |
| YNL041C   | -1.281751796 | -0.961753613 | -1.345884211 |
| YNL042W   |              |              |              |
| YNL042W-B |              |              |              |
| YNL043C   | 0.033652103  | 0.857215487  | 0.038460426  |
| YNL044W   | 0.165467507  | 0.103159944  | 0.206278764  |
| YNL045W   | -0.059150974 | -0.084166397 | -0.068539407 |
| YNL046W   | -0.244737504 | 0.097442317  | -0.275837388 |
| YNL047C   | -0.127488007 | -0.186277045 | -0.116222302 |
| YNL048W   |              |              |              |
| YNL049C   | 0.206928263  | 0.034674214  | 0.208314398  |
| YNL050C   | 0.316146719  | -1.165118125 | 0.338048709  |
| YNL051W   | 1.255229192  | 1.523084556  | 1.134936189  |
| YNL052W   | 0.12184135   | 0.020432602  | 0.114484293  |
| YNL053W   | -0.037087891 | -0.295424393 | -0.03428223  |
| YNL054W   | -0.161449164 | 0.177522152  | -0.129034533 |
| YNL055C   | -0.001871188 | 0.685453181  | -0.001483931 |
| YNL056W   | -2.659359942 | -0.014949792 | -2.034725257 |
| YNL057W   | -0.045703111 | 0.046148932  | -0.044243504 |
| YNL058C   | 0.485627916  | -0.028729434 | 0.435578995  |
| YNL059C   | -0.067245349 | -0.016824304 | -0.061764053 |

|           |              |              |              |
|-----------|--------------|--------------|--------------|
| YNL061W   | 2.805654748  | 8.769451346  | 0.948895503  |
| YNL062C   | -11.1033206  | -9.0246122   | -6.730588544 |
| YNL063W   | -0.177960454 | -0.099597346 | -0.217698457 |
| YNL064C   | 0.088689693  | 0.431219534  | 0.131823802  |
| YNL065W   | 0.05753616   | 0.072524243  | 0.07152798   |
| YNL066W   | 0.007019699  | -2.027759346 | 0.00752787   |
| YNL067W   | -0.249521266 | -1.374206321 | -0.179112064 |
| YNL067W-A |              |              |              |
| YNL067W-B |              |              |              |
| YNL068C   | -1.052457767 | -0.56055145  | -1.130721274 |
| YNL069C   | 10.03773788  | 3.199829709  | 3.180326888  |
| YNL070W   | 0.460758141  | 0.15855819   | 0.439910589  |
| YNL071W   | -0.043827729 | 0.012264276  | -0.051853987 |
| YNL072W   | -0.035780135 | -0.093002848 | -0.032920606 |
| YNL073W   | -0.08780201  | -0.275131868 | -0.109799079 |
| YNL074C   | 0.666135151  | 0.218108076  | 0.791774589  |
| YNL075W   | 2.049798897  | 1.207280761  | 1.048027851  |
| YNL076W   | 0.92895911   | -0.020553358 | 1.113927037  |
| YNL077W   | 0.649391568  | -0.032265399 | 0.771567934  |
| YNL078W   | 0.124697878  | 0.003121387  | 0.173428696  |
| YNL079C   | 0.412488047  | 0.039446715  | 0.36190431   |
| YNL080C   | -1.01500278  | -0.164585052 | -1.305507041 |
| YNL081C   | -0.461651273 | -0.031282461 | -0.432124632 |
| YNL082W   | 0.024833969  | -0.177271576 | 0.028006057  |
| YNL083W   |              |              |              |
| YNL084C   | 0.562483042  | -1.169903702 | 0.449192013  |
| YNL085W   | 0.094535267  | -0.049231058 | 0.133032896  |
| YNL086W   | 0.047394975  | 0.345293704  | 0.039800495  |
| YNL087W   | -0.053859078 | -0.018931665 | -0.077237583 |
| YNL088W   | -0.039806393 | -0.04810982  | -0.027929508 |
| YNL089C   | 0.718454225  | 0.243894428  | 1.053156401  |
| YNL090W   | 1.402488117  | 0.416872871  | 1.182609211  |
| YNL091W   | -5.583133388 | -6.027597195 | -5.706760096 |
| YNL092W   | -0.000948966 | 0.091373874  | -0.000930675 |
| YNL093W   | -1.326888622 | -1.151096449 | -1.374317608 |
| YNL094W   | 0.282112084  | -1.893422226 | 0.208913166  |
| YNL095C   | -0.008978865 | 0.008135576  | -0.009474739 |
| YNL096C   | 0.064086275  | 0.082776507  | 0.040708501  |
| YNL097C   | -3.50824612  | -1.181232364 | -3.4792921   |
| YNL097C-B |              |              |              |
| YNL097W-A |              |              |              |
| YNL098C   | -2.419050605 | -0.376324867 | -1.869421999 |
| YNL099C   | 0.390355796  | -2.027655338 | 0.483554646  |
| YNL100W   | -0.130191317 | -0.721631856 | -0.101151776 |
| YNL101W   | 0.742765989  | -0.372128865 | 0.823045857  |
| YNL102W   | -0.074976678 | -0.043468965 | -0.062628697 |
| YNL103W   | -0.196349063 | 0.022188347  | -0.215436293 |
| YNL103W-A |              |              |              |
| YNL104C   | 0.159722119  | 0.152092298  | 0.18948899   |
| YNL105W   | -0.018849309 | -0.121266264 | -0.018517073 |
| YNL106C   | -0.005033451 | 0.17011022   | -0.006284417 |
| YNL107W   | 0.134646243  | 0.253650799  | 0.117336206  |
| YNL108C   | 0.155774025  | 0.150994516  | 0.139432027  |

|           |              |              |              |
|-----------|--------------|--------------|--------------|
| YNL109W   | -2.095899843 | 0.627612891  | -1.755350625 |
| YNL110C   | -2.48137105  | 0.89433139   | -1.180452207 |
| YNL111C   | 0.050731774  | -1.231159776 | 0.053927355  |
| YNL112W   |              |              |              |
| YNL113W   | 1.985714589  | 1.030573618  | 1.067523411  |
| YNL114C   | 4.44347735   | 1.360258754  | 2.189961474  |
| YNL115C   | 0.118368228  | -0.04766894  | 0.153596406  |
| YNL116W   | -0.373263028 | 0.029152439  | -0.38348737  |
| YNL117W   | 0.086798326  | -0.577229979 | 0.080751909  |
| YNL118C   | 11.09260967  | 1.949416931  | 6.31546622   |
| YNL119W   | -0.171884827 | 0.000368614  | -0.138645941 |
| YNL120C   | 0.190369005  | -0.076279681 | 0.117177931  |
| YNL121C   | 0.585012483  | 1.440481703  | 0.439975832  |
| YNL122C   | -1.953486355 | -0.078387624 | -1.518443361 |
| YNL123W   | 0.639263262  | 0.159146771  | 0.706117691  |
| YNL124W   | 0.004904283  | 0.842134141  | 0.007583419  |
| YNL125C   | 0.946170847  | -0.709348892 | 0.795541846  |
| YNL126W   | 7.94758972   | -1.860437483 | 3.635751782  |
| YNL127W   | 0.072154884  | -0.031938756 | 0.089520459  |
| YNL128W   | 1.128935276  | -0.022681575 | 1.243957879  |
| YNL129W   | 0.064838049  | 0.059571199  | 0.056514093  |
| YNL130C   | 0.015780198  | -0.000109214 | 0.013236268  |
| YNL130C-A |              |              |              |
| YNL131W   | -0.619332066 | -0.250298072 | -0.555286385 |
| YNL132W   | 1.296656731  | -0.366605502 | 1.217007022  |
| YNL133C   | 0.240431122  | -0.033505749 | 0.190599381  |
| YNL134C   | 0.027119712  | -0.130773105 | 0.03007911   |
| YNL135C   | 0.016907521  | -0.216618367 | 0.014371891  |
| YNL136W   | 0.028552126  | -1.009820387 | 0.02755591   |
| YNL137C   | 2.425782736  | -1.259739487 | 1.782966835  |
| YNL138W   | -0.542921853 | 0.841621817  | -0.321971479 |
| YNL138W-A |              |              |              |
| YNL139C   | -0.096213902 | 2.436185273  | -0.054933482 |
| YNL140C   | 2.582753739  | 0.366659606  | 1.485763317  |
| YNL141W   | -0.245948288 | 0.119424652  | -0.243117496 |
| YNL142W   | 0.095541902  | -0.006923258 | 0.074793113  |
| YNL143C   | 0.019794082  | -0.004611847 | 0.01570002   |
| YNL144C   | 0.207439155  | 0.558219826  | 0.249727519  |
| YNL144W-A |              |              |              |
| YNL145W   | 0.102632887  | -1.720355029 | 0.101092462  |
| YNL146C-A |              |              |              |
| YNL146W   | -0.066108565 | -0.340413308 | -0.044433466 |
| YNL147W   | -1.539297758 | -2.287352334 | -1.611413939 |
| YNL148C   | 0.001079622  | -0.284441935 | 0.001234287  |
| YNL149C   | 0.156995837  | -0.018262849 | 0.185111778  |
| YNL150W   | 1.455072881  | 0.659057311  | 1.775117481  |
| YNL151C   | 1.322978623  | -0.035370223 | 2.110049781  |
| YNL152W   | 0.553904989  | 1.055395386  | 0.741887558  |
| YNL153C   | 0.076093164  | -0.034675671 | 0.088217831  |
| YNL154C   | -0.250978156 | -0.448304403 | -0.277239649 |
| YNL155W   |              |              |              |
| YNL156C   | -0.071381909 | -0.004521585 | -0.08172766  |
| YNL157W   | -2.110183701 | -0.386010223 | -2.068969176 |

|           |              |              |              |
|-----------|--------------|--------------|--------------|
| YNL158W   | -0.018940322 | -0.367656239 | -0.026756783 |
| YNL159C   | -0.029957197 | -0.731718514 | -0.031956554 |
| YNL160W   | 0.461726483  | 0.345081265  | 0.528812699  |
| YNL161W   | 1.481272474  | 0.233033489  | 1.127330222  |
| YNL162W   |              |              |              |
| YNL162W-A |              |              |              |
| YNL163C   | 0.054813472  | 0.04823517   | 0.074416542  |
| YNL164C   | 0.023162772  | -0.813570688 | 0.028046163  |
| YNL165W   | 0.00447322   | 0.007564732  | 0.006755863  |
| YNL166C   |              |              |              |
| YNL167C   | -1.686080512 | -2.108489665 | -1.731578958 |
| YNL168C   | 0.003446269  | 0.114165591  | 0.005307911  |
| YNL169C   | 4.581257013  | 0.020463403  | 1.322998731  |
| YNL170W   | -2.916144944 | -0.430637697 | -2.552588598 |
| YNL171C   | 0.054587643  | 0.014132164  | 0.05714735   |
| YNL172W   | -1.183250135 | -0.023666503 | -1.262138608 |
| YNL173C   | 0.21150225   | -0.070405859 | 0.256013992  |
| YNL174W   |              |              |              |
| YNL175C   | -0.307282192 | -0.135730929 | -0.329228172 |
| YNL176C   | -0.690044454 | 0.051188016  | -1.07321244  |
| YNL177C   | 0.024871918  | -0.759965704 | 0.023530441  |
| YNL178W   | 3.713476504  | 3.983335808  | 1.642554109  |
| YNL179C   | -0.674123575 | -0.571140576 | -0.642132035 |
| YNL180C   | -3.566221595 | 0.196557083  | -2.580709346 |
| YNL181W   | -0.413732684 | -0.202896619 | -0.362097492 |
| YNL182C   | 0.082975107  | -0.006777999 | 0.086124062  |
| YNL183C   | -0.226434858 | -0.036924799 | -0.279370324 |
| YNL184C   | 0.498412742  | 0.573663001  | 0.457457203  |
| YNL185C   | 0.450448691  | -0.206955143 | 0.337432623  |
| YNL186W   |              |              |              |
| YNL187W   | 0.028343232  | -0.001639605 | 0.026468658  |
| YNL188W   | -0.018778836 | -1.309704292 | -0.019434393 |
| YNL189W   | 0.185487614  | -0.913464407 | 0.161268342  |
| YNL190W   | -2.161400943 | -0.083618542 | -1.947218461 |
| YNL191W   | 0.067976444  | -0.180219932 | 0.081575439  |
| YNL192W   | 0.09783145   | -1.202757267 | 0.13024358   |
| YNL193W   | 0.037182677  | -0.499995856 | 0.044517097  |
| YNL194C   | 0.199616357  | 0.324784919  | 0.209035255  |
| YNL195C   | 0.073970282  | -0.211335107 | 0.073488348  |
| YNL196C   | -0.157180257 | -0.041151078 | -0.188066117 |
| YNL197C   | -2.733552601 | 0.080217311  | -2.241131246 |
| YNL198C   | -0.090653925 | 0.015361347  | -0.10846787  |
| YNL199C   | -0.100908127 | 0.016339001  | -0.129395717 |
| YNL200C   | -1.755888636 | -0.125470384 | -1.706514174 |
| YNL201C   | -5.772465593 | -1.624376409 | -3.958353552 |
| YNL202W   | 0.637002829  | -0.026419807 | 0.555234331  |
| YNL203C   | 0.036718574  | -0.048875989 | 0.03901349   |
| YNL204C   | -0.170936915 | -0.160476547 | -0.183673415 |
| YNL205C   | 0.04876216   | -0.077635949 | 0.054830193  |
| YNL206C   | 0.094631876  | -1.319711669 | 0.087171381  |
| YNL207W   | -0.468452408 | -0.258118951 | -0.425832795 |
| YNL208W   |              |              |              |
| YNL209W   |              |              |              |

|         |              |              |              |
|---------|--------------|--------------|--------------|
| YNL210W | -1.520034943 | 0.008803345  | -1.339923363 |
| YNL211C | -0.023335922 | -0.012791752 | -0.028054259 |
| YNL212W | -0.038204613 | 6.602661871  | -0.018264859 |
| YNL213C | 0.866491241  | -1.570418256 | 0.779142158  |
| YNL214W | 0.047021465  | 0.105065134  | 0.044417268  |
| YNL215W | 0.888988906  | 1.103832725  | 0.767117437  |
| YNL216W | 1.90124425   | 0.334257432  | 1.375473998  |
| YNL217W | 0.103220455  | -0.888087886 | 0.122604344  |
| YNL218W | -0.393451628 | 0.018313468  | -0.385107735 |
| YNL219C | 0.005173586  | -0.095649761 | 0.005079241  |
| YNL220W | -0.091697815 | 0.923475478  | -0.062395757 |
| YNL221C | 1.000824762  | 0.009181471  | 0.769026426  |
| YNL222W | -2.445931043 | -1.855448355 | -2.364254957 |
| YNL223W |              | -19.50969655 |              |
| YNL224C | 2.903964995  | -1.478995865 | 2.327814085  |
| YNL225C | -1.821450458 | 0.268096837  | -1.74350504  |
| YNL226W | 0.135925639  | 0.532190682  | 0.155600336  |
| YNL227C | 0.032982232  | 0.063635152  | 0.027241014  |
| YNL228W | -0.03338234  | -0.012480553 | -0.051434118 |
| YNL229C | -0.208728526 | 0.011055657  | -0.233510437 |
| YNL230C | 0.060223016  | -0.081481759 | 0.06961144   |
| YNL231C | -0.214728    | -1.135978244 | -0.186575898 |
| YNL232W | 5.233252266  | 4.702386859  | 2.568289623  |
| YNL233W | -0.289119068 | 0.551398029  | -0.390170977 |
| YNL234W |              |              |              |
| YNL235C | -0.766412682 | 0.033859066  | -0.871368954 |
| YNL236W | -1.666486079 | 0.161536538  | -1.38267058  |
| YNL237W | -0.469010502 | -1.384588581 | -0.388340503 |
| YNL238W | -2.910357628 | -0.510106655 | -2.490971549 |
| YNL239W | -0.026847996 | -0.093324157 | -0.036083836 |
| YNL240C | 1.559895983  | 0.271646394  | 1.968062984  |
| YNL241C | 0.414542759  | 0.049616828  | 0.415861383  |
| YNL242W | 0.091398047  | -0.178420302 | 0.11454379   |
| YNL243W | -0.030569558 | 0.019683043  | -0.033817571 |
| YNL244C | -4.189689138 | -1.857048505 | -5.484160065 |
| YNL245C | 1.010694063  | 0.697795264  | 0.724130691  |
| YNL246W | -2.384434114 | -0.104882663 | -1.904775629 |
| YNL247W | 0.000151352  | -0.075512309 | 0.000139267  |
| YNL248C | 3.003057309  | 0.952954461  | 1.778072945  |
| YNL249C | 0.891466814  | 0.220445283  | 0.922852228  |
| YNL250W | -0.023500116 | -0.09075279  | -0.027822647 |
| YNL251C | 0.238321292  | 0.002007863  | 0.250855308  |
| YNL252C | 1.97089893   | -0.0730281   | 2.245328564  |
| YNL253W | 0.491120587  | -0.15378949  | 0.484995295  |
| YNL254C | -0.278430467 | -0.64943375  | -0.246864213 |
| YNL255C | -0.382149297 | 0.048707999  | -0.533870025 |
| YNL256W | -0.018065261 | 0.84869246   | -0.025085715 |
| YNL257C | 1.018510856  | -0.034287284 | 1.039709703  |
| YNL258C | 1.089427302  | 0.390184021  | 1.073062719  |
| YNL259C | 0.184578378  | -1.237320724 | 0.171218405  |
| YNL260C | 0.067458551  | 0.309370039  | 0.086566713  |
| YNL261W | 1.283400931  | 0.030771017  | 1.250853295  |
| YNL262W | -0.138757897 | -1.251440906 | -0.120972902 |

|           |              |              |              |
|-----------|--------------|--------------|--------------|
| YNL263C   | 2.36543069   | -0.15771523  | 1.70231076   |
| YNL264C   | 1.252031118  | 0.023876128  | 1.263754729  |
| YNL265C   | 0.03268106   | 0.243994136  | 0.035189668  |
| YNL266W   | 0.676159602  | 0.004180009  | 0.84713753   |
| YNL267W   | -5.699195795 | -4.236117787 | -3.018246408 |
| YNL268W   | -0.286608879 | -0.732651576 | -0.390573664 |
| YNL269W   | 0.941226911  | -0.020929183 | 1.163824756  |
| YNL270C   | 0.554365385  | -0.004766329 | 0.5558095    |
| YNL271C   | 0.307544321  | -0.005248317 | 0.42292369   |
| YNL272C   | 0.885946053  | 1.028853471  | 0.935838485  |
| YNL273W   | 0.21592898   | 0.057621769  | 0.2188292    |
| YNL274C   | -0.066128469 | 0.028012683  | -0.092039604 |
| YNL275W   | 0.227319446  | 0.958186846  | 0.1924853    |
| YNL276C   | 0.4742426    | 0.352812286  | 0.48865292   |
| YNL277W   | 1.06100133   | -0.013672865 | 0.95664308   |
| YNL277W-A |              |              |              |
| YNL278W   | -0.44132766  | -0.300149064 | -0.522045705 |
| YNL279W   | 0.013727573  | -0.001039679 | 0.017214307  |
| YNL280C   | 0.620436272  | -0.003760324 | 0.710653646  |
| YNL281W   | 0.066489916  | 0.243265241  | 0.082439079  |
| YNL282W   | 0.168442306  | -0.038876739 | 0.146796967  |
| YNL283C   | 0.745823504  | 0.033602427  | 0.878232686  |
| YNL284C   | -0.055820543 | -0.009102912 | -0.058189103 |
| YNL285W   | 0.069814776  | 0.079604074  | 0.07130122   |
| YNL286W   | 0.016831121  | -0.020165692 | 0.023365419  |
| YNL287W   | -0.25039306  | -6.024796981 | -0.103455763 |
| YNL288W   | -1.454227615 | -2.749316654 | -1.491103878 |
| YNL289W   | 0.075096653  | -1.311570688 | 0.094181195  |
| YNL290W   | -0.025317455 | 1.878447228  | -0.029838881 |
| YNL291C   | -0.03240789  | -0.761982002 | -0.042959985 |
| YNL292W   | 0.504636274  | -0.18176506  | 0.571774079  |
| YNL293W   | -0.019580664 | -1.734023327 | -0.022451648 |
| YNL294C   | -0.045740338 | -0.505542428 | -0.062915762 |
| YNL295W   | 0.00405498   | -0.089073715 | 0.003624122  |
| YNL296W   | -0.049110478 | -0.267537959 | -0.064504132 |
| YNL297C   | -0.204077674 | -0.003453612 | -0.222271591 |
| YNL298W   | 0.218154591  | 0.001340453  | 0.26157951   |
| YNL299W   | 1.023564028  | 0.070786407  | 1.163257292  |
| YNL300W   | 0.000428233  | -1.126421129 | 0.000560596  |
| YNL301C   | -0.048307752 | -0.021197265 | -0.065841447 |
| YNL302C   | 5.035267531  | 7.570189247  | 1.341831387  |
| YNL303W   | 0.046814736  | -0.130915993 | 0.051860232  |
| YNL304W   | 0.317823985  | 0.024332963  | 0.333606625  |
| YNL305C   | 0.033945681  | 0.026264572  | 0.050310372  |
| YNL306W   | -0.034085213 | -0.002331108 | -0.042018538 |
| YNL307C   | -1.523364871 | -0.565707517 | -1.31766875  |
| YNL308C   | 0.056486084  | -1.274864839 | 0.049593286  |
| YNL309W   | 0.152237741  | 0.589350454  | 0.238257126  |
| YNL310C   | 0.071684578  | 0.239181238  | 0.092035512  |
| YNL311C   | 0.083070392  | 0.006645596  | 0.124489314  |
| YNL312W   | 0.24256136   | -0.060922245 | 0.316631485  |
| YNL313C   | 0.3557193    | -0.010481761 | 0.359173405  |
| YNL314W   | -0.008349429 | -0.039274752 | -0.010878005 |



|           |              |              |              |
|-----------|--------------|--------------|--------------|
| YNL315C   | 0.118371596  | 0.026811262  | 0.135407331  |
| YNL316C   | -0.053350051 | -0.019132919 | -0.065349764 |
| YNL317W   | 1.463298525  | 1.51263247   | 1.071123189  |
| YNL318C   | 1.02984432   | -0.020376156 | 1.022963475  |
| YNL319W   | 1.019229227  | -0.611513377 | 1.035915626  |
| YNL320W   | 0.500887938  | -0.10628322  | 0.426179119  |
| YNL321W   | -0.003781274 | 0.125787889  | -0.003728277 |
| YNL322C   | -0.281305872 | -0.065998505 | -0.241466005 |
| YNL323W   | -10.15441905 | 0.241287808  | -7.918786051 |
| YNL324W   | -0.004094441 | 0.152724252  | -0.004383978 |
| YNL325C   | -0.026480279 | -0.049319256 | -0.029157273 |
| YNL326C   | 2.800595485  | 0.683726758  | 2.467906614  |
| YNL327W   | 0.968694906  | 1.538624166  | 1.000788378  |
| YNL328C   | 0.030629629  | 0.00602265   | 0.029633866  |
| YNL329C   | -0.025532691 | -0.006529529 | -0.026665966 |
| YNL330C   | -1.439476032 | -0.947760678 | -0.931770736 |
| YNL331C   | -8.48598956  | -8.642990887 | -2.567727745 |
| YNL332W   | 0.059722783  | -0.001443846 | 0.057342877  |
| YNL333W   | 0.72632442   | 0.024508968  | 0.824363085  |
| YNL334C   | 0.556208715  | 0.834247282  | 0.532069726  |
| YNL335W   | 0.443210771  | 0.166484729  | 0.435550821  |
| YNL336W   | 0.601242751  | -0.293420555 | 0.60707971   |
| YNL337W   |              |              |              |
| YNL338W   | 0.637192075  | 0.00391293   | 0.779261179  |
| YNL339C   | 0.451615416  | 0.187119632  | 0.465118079  |
| YNL339W-A |              |              |              |
| YNL339W-B |              |              |              |
| YNR001C   | 3.790325396  | 1.921416985  | 2.383325684  |
| YNR001W-A |              |              |              |
| YNR002C   | 0.115087225  | -0.086545338 | 0.146677213  |
| YNR003C   | 0.575325116  | 1.589292823  | 0.436401378  |
| YNR003W-A |              |              |              |
| YNR004W   | -0.137362343 | 0.10252545   | -0.187980975 |
| YNR005C   | -0.784697369 | -1.237832861 | -0.661539201 |
| YNR006W   | -0.800623391 | -1.526622829 | -0.930443039 |
| YNR007C   | 0.167074806  | -0.409430445 | 0.196741511  |
| YNR008W   | 0.237543136  | 0.009631948  | 0.269803225  |
| YNR009W   | -1.230562421 | 0.267092067  | -1.140101539 |
| YNR010W   | -1.708203301 | -2.744237006 | -1.21035196  |
| YNR011C   | -0.08945605  | 0.077887905  | -0.082282196 |
| YNR012W   | 0.025272573  | -0.579353358 | 0.018783666  |
| YNR013C   | -0.33675958  | -0.051890819 | -0.316596588 |
| YNR014W   | 0.076394898  | -0.753964915 | 0.066800534  |
| YNR015W   | -0.204821003 | -2.102805467 | -0.192493561 |
| YNR016C   | -3.105356184 | -1.951009153 | -2.637242836 |
| YNR017W   | 2.111309278  | 0.161246786  | 2.321589637  |
| YNR018W   | -0.106193566 | 0.175704669  | -0.119022957 |
| YNR019W   | -0.650997991 | -2.9715605   | -0.672774829 |
| YNR020C   | -0.075037274 | -0.307568001 | -0.079167353 |
| YNR021W   | -0.062506576 | -1.049331942 | -0.045667141 |
| YNR022C   | -0.169679591 | -0.014323385 | -0.142721956 |
| YNR023W   | -0.039967446 | -0.407981664 | -0.015100367 |
| YNR024W   | 1.096390913  | -0.035806041 | 0.827415095  |

|           |              |              |              |
|-----------|--------------|--------------|--------------|
| YNR025C   | 0.012208351  | 2.323580606  | 0.01118473   |
| YNR026C   | -2.651804162 | -0.423573414 | -2.771158821 |
| YNR027W   | -0.280191674 | 0.042512474  | -0.273359458 |
| YNR028W   | 1.884481474  | 0.117885374  | 1.292866465  |
| YNR029C   | -0.083737469 | -0.773227311 | -0.094240177 |
| YNR030W   | -1.327041373 | -0.064824124 | -0.737089532 |
| YNR031C   | 0.024417206  | 0.006983062  | 0.024612804  |
| YNR032C-A | -0.000988576 | -0.058707142 | -0.001214301 |
| YNR032W   | 0.513149357  | -0.00275315  | 0.522166368  |
| YNR033W   | -0.007106141 | 0.218905635  | -0.007063421 |
| YNR034W   | -0.048945032 | 0.000679018  | -0.040764983 |
| YNR034W-A |              |              |              |
| YNR035C   | -0.65596468  | -0.787216955 | -0.62381295  |
| YNR036C   | -0.155444397 | -2.019392075 | -0.150366319 |
| YNR037C   | -0.012603892 | -0.007245848 | -0.014048526 |
| YNR038W   | 0.130428081  | 0.675888784  | 0.098657722  |
| YNR039C   | 0.030399456  | 0.020059226  | 0.030380389  |
| YNR040W   | -0.175744486 | 0.004816281  | -0.198388585 |
| YNR041C   | -0.483453494 | -0.083460802 | -0.588789758 |
| YNR042W   | -0.01375647  | -0.561206525 | -0.014005271 |
| YNR043W   | -1.78951068  | -0.3543593   | -1.242010085 |
| YNR044W   |              |              |              |
| YNR045W   | -0.918700807 | -2.285042843 | -0.794158135 |
| YNR046W   | 0.114658224  | 0.930479312  | 0.084437734  |
| YNR047W   | -4.339377439 | -3.831109931 | -2.088709337 |
| YNR048W   | 0.299864326  | 2.459925515  | 0.247616398  |
| YNR049C   | 0.022052989  | -0.334506594 | 0.023308103  |
| YNR050C   | 0.021558723  | -0.077627241 | 0.02228069   |
| YNR051C   | -18.2599054  | -6.007166131 | -11.54495113 |
| YNR052C   | 0.020229262  | -2.660124818 | 0.016542841  |
| YNR053C   | 2.092372487  | 1.711481585  | 1.439537292  |
| YNR054C   | 0.895838094  | 0.025647036  | 1.072075028  |
| YNR055C   | 0.274920101  | -0.027855914 | 0.297537555  |
| YNR056C   | 0.129264351  | -0.978295575 | 0.165656769  |
| YNR057C   | 0.298579147  | 2.267903171  | 0.267669143  |
| YNR058W   | -0.006196203 | 0.053338576  | -0.00638358  |
| YNR059W   | 0.837208827  | -0.120176414 | 0.925958283  |
| YNR060W   | 1.326428612  | 2.553153913  | 1.158963771  |
| YNR061C   | -1.355066695 | -0.962940965 | -1.28405019  |
| YNR062C   | -0.083664863 | 0.473723711  | -0.095232358 |
| YNR063W   | 0.013756924  | -0.222960489 | 0.014901652  |
| YNR064C   | -0.022275586 | 0.009825803  | -0.022457798 |
| YNR065C   | -0.078417757 | -0.751298039 | -0.084341911 |
| YNR066C   | -0.030161222 | -0.112970316 | -0.02828509  |
| YNR067C   | 0.104733489  | -0.657278691 | 0.099936847  |
| YNR068C   | 0.06885844   | -0.262406802 | 0.071077983  |
| YNR069C   | 1.16811055   | 0.299039353  | 0.799745608  |
| YNR070W   | -0.012660578 | 1.042246872  | -0.013599721 |
| YNR071C   | -0.405355027 | 0.049808561  | -0.21146611  |
| YNR072W   | -0.085789576 | 0.72518301   | -0.043747802 |
| YNR073C   | -0.019101806 | -0.004062271 | -0.017129118 |
| YNR074C   | 0.649244787  | 1.11380667   | 0.569118381  |
| YNR075C-A |              |              |              |

|           |              |              |              |
|-----------|--------------|--------------|--------------|
| YNR075W   | 0.819567833  | 0.120103011  | 0.731809757  |
| YNR076W   |              |              |              |
| YNR077C   |              |              |              |
| YOL001W   | -0.251200524 | 0.047649386  | -0.31134066  |
| YOL002C   | 6.799181739  | -0.221494865 | 1.369390369  |
| YOL003C   | 0.146343333  | 0.024640534  | 0.162971621  |
| YOL004W   | 0.02427496   | 0.086894855  | 0.032410361  |
| YOL005C   | 1.412235226  | 1.579781798  | 1.279381454  |
| YOL006C   | -0.004520967 | 0.279890941  | -0.00473842  |
| YOL007C   | -0.008070682 | 0.626341006  | -0.009295801 |
| YOL008W   | 0.872517503  | 0.128968407  | 0.947129352  |
| YOL009C   | -0.37100258  | 0.983698641  | -0.483376262 |
| YOL010W   | 0.8419622    | 0.351131931  | 0.984491541  |
| YOL011W   | -0.496163236 | 0.034100713  | -0.663805101 |
| YOL012C   | -3.467034965 | -0.423282458 | -2.851715356 |
| YOL013C   | 0.752528344  | 0.008795556  | 1.077385587  |
| YOL013W-A | -0.140851344 | -0.125718685 | -0.089072258 |
| YOL013W-B |              |              |              |
| YOL014W   | 0.077132669  | -0.0069671   | 0.101929909  |
| YOL015W   | 0.0485424    | 0.328271875  | 0.057428148  |
| YOL016C   | -0.322839766 | 0.108579293  | -0.403717727 |
| YOL017W   | 0.062238968  | -0.103652458 | 0.058277906  |
| YOL018C   | 0.008956552  | -1.237127678 | 0.008738864  |
| YOL019W   | -0.775349006 | -3.190687908 | -0.524433294 |
| YOL019W-A |              |              |              |
| YOL020W   | 0.057237561  | 0.116582281  | 0.067776873  |
| YOL021C   | 8.08449056   | 8.178535505  | 2.302649517  |
| YOL022C   | 1.429744311  | 0.520767004  | 1.427956422  |
| YOL023W   | 0.506758841  | 0.127523103  | 0.679973387  |
| YOL024W   | 0.062632762  | 0.840063216  | 0.084050161  |
| YOL025W   | -0.729206187 | 0.420366069  | -1.098453974 |
| YOL026C   | -0.018165185 | -0.103338449 | -0.023827877 |
| YOL027C   | -0.769757879 | -0.430911894 | -1.053670754 |
| YOL028C   | 0.04324687   | -0.009959965 | 0.040761914  |
| YOL029C   | -0.079700933 | -0.69581742  | -0.07538436  |
| YOL030W   | 1.088794379  | -0.083459551 | 1.141039474  |
| YOL031C   | 0.446005931  | -0.050624113 | 0.388332854  |
| YOL032W   | 0.086599779  | 0.651814243  | 0.08908598   |
| YOL033W   | -0.288499803 | 0.337008367  | -0.35000756  |
| YOL034W   | 0.647662837  | 0.000911439  | 0.689897492  |
| YOL035C   | 0.085915707  | 0.785908242  | 0.099160403  |
| YOL036W   | 2.290064497  | 0.085795956  | 2.224502764  |
| YOL037C   | 0.643930679  | -0.286588025 | 0.856148401  |
| YOL038C-A |              |              |              |
| YOL038W   | 5.315650956  | 0.289658845  | 4.276025662  |
| YOL039W   | 0.456872855  | 0.502491464  | 0.582533013  |
| YOL040C   | 1.789374785  |              | 0.385779763  |
| YOL041C   | 1.503647303  | 1.534654261  | 1.521314708  |
| YOL042W   | -0.085391077 | -2.114890341 | -0.042010474 |
| YOL043C   | -0.191173447 | -0.001498062 | -0.200975694 |
| YOL044W   | 0.332784382  | 0.558383149  | 0.281079466  |
| YOL045W   | 0.970968518  | -0.10963568  | 0.709119672  |
| YOL046C   | -0.286024158 | -0.15217973  | -0.32593342  |

|           |              |              |              |
|-----------|--------------|--------------|--------------|
| YOL047C   | -0.009084656 | -0.306970238 | -0.008669964 |
| YOL048C   | 0.014268604  | -0.114803201 | 0.017389098  |
| YOL049W   | 0.054692869  | -1.127518213 | 0.06303846   |
| YOL050C   | -0.340471389 | 0.032658947  | -0.439343835 |
| YOL051W   | -4.360761596 | -0.124687388 | -3.559836729 |
| YOL052C   | 0.006504549  |              | 0.004923967  |
| YOL052C-A |              |              |              |
| YOL053C-A | 0.008096613  | 0.027197796  | 0.009592396  |
| YOL053W   | -0.845921532 | -0.0406607   | -0.881300469 |
| YOL054W   | -0.021687525 | 0.983455301  | -0.026639835 |
| YOL055C   | -0.009101531 | -0.180296216 | -0.010802371 |
| YOL056W   | 1.33703099   | 1.577482785  | 0.980449713  |
| YOL057W   | -0.179301126 | 0.998909188  | -0.186539021 |
| YOL058W   | 0.151664199  | -0.030236398 | 0.177466028  |
| YOL059W   | -0.026952036 | -0.222206799 | -0.029053242 |
| YOL060C   | 0.640712701  | 0.066462739  | 0.684528077  |
| YOL061W   | 0.26814429   | -1.247877904 | 0.416281696  |
| YOL062C   | 0.771179208  | 0.970662851  | 1.015101476  |
| YOL063C   | 1.252607016  | -0.032381923 | 1.248634515  |
| YOL064C   | 0.018087614  | -0.251139273 | 0.015403486  |
| YOL065C   | 0.420100642  | 1.38176651   | 0.407785977  |
| YOL066C   | 0.032278433  | -0.276481707 | 0.037245585  |
| YOL067C   | 0.065908195  | 0.298969122  | 0.047998111  |
| YOL068C   | 1.310552575  | -0.167341913 | 1.051625942  |
| YOL069W   | 0.123683235  | -0.658381354 | 0.098552872  |
| YOL070C   | -0.100583462 | -0.034916491 | -0.103191221 |
| YOL071W   | 0.066912458  | 0.684979755  | 0.08048229   |
| YOL072W   | 0.103154151  | -0.610049853 | 0.107991372  |
| YOL073C   |              |              |              |
| YOL075C   | -0.106772883 | -0.049568371 | -0.159612185 |
| YOL076W   | -0.004960621 | 0.127845965  | -0.00878728  |
| YOL077C   | 1.652546581  | 1.26566667   | 0.84416547   |
| YOL077W-A |              |              |              |
| YOL078W   | -1.26670614  | -0.825004441 | -1.735922233 |
| YOL079W   | 0.265645274  | 0.211419173  | 0.263163393  |
| YOL080C   | 0.010098408  | -0.023104748 | 0.011282911  |
| YOL081W   | 0.077650002  | 0.391077838  | 0.060460864  |
| YOL082W   | 1.340062765  | -0.031270859 | 1.394172165  |
| YOL083C-A |              |              |              |
| YOL083W   | 0.015380453  | 0.341064896  | 0.016176441  |
| YOL084W   | -0.143105506 | 0.039056125  | -0.155957167 |
| YOL085C   | 0.107740818  | 0.007156483  | 0.110483185  |
| YOL085W-A |              |              |              |
| YOL086C   | 0.083201967  | 1.115880814  | 0.071077042  |
| YOL086W-A |              |              |              |
| YOL087C   | -3.506359531 | -1.632673723 | -1.662012252 |
| YOL088C   | -1.824774438 | 1.180689711  | -2.269606563 |
| YOL089C   | -1.163357908 | 0.446111576  | -1.273526113 |
| YOL090W   | -1.192337181 | -0.530112633 | -0.899833404 |
| YOL091W   | -0.045285111 | 0.555491347  | -0.043349969 |
| YOL092W   | -0.044627284 | 0.069558277  | -0.052353697 |
| YOL093W   | -0.028010394 | 0.055186741  | -0.026463321 |
| YOL094C   | 0.561689293  | -1.496511178 | 0.452600158  |

|           |              |              |              |
|-----------|--------------|--------------|--------------|
| YOL095C   | 0.07522797   | -0.023307812 | 0.101922528  |
| YOL096C   | -0.467031678 | -1.687066575 | -0.403748986 |
| YOL097C   | -0.029685189 | 0.00671359   | -0.032928343 |
| YOL097W-A |              |              |              |
| YOL098C   | 0.019239619  | 0.059140023  | 0.020311447  |
| YOL099C   | 0.092478657  | 0.599979292  | 0.115403475  |
| YOL100W   | -0.31561951  | 0.357595339  | -0.548860537 |
| YOL101C   | 0.795828081  | -1.85284622  | 1.002054004  |
| YOL102C   | 0.568387221  | -0.044528298 | 0.600177237  |
| YOL103W   | 0.003968552  | 1.120785582  | 0.004731678  |
| YOL104C   | 0.063380637  | 0.299686282  | 0.074441823  |
| YOL105C   | -2.49540588  | -1.694206556 | -1.782999117 |
| YOL106W   | -0.164488305 | 0.083227444  | -0.16883006  |
| YOL107W   | 0.174409669  | 0.351293128  | 0.17066816   |
| YOL108C   | 0.646382004  | 0.134456225  | 0.542637838  |
| YOL109W   | -1.307342917 | -0.160438705 | -1.292112444 |
| YOL110W   | -2.627176006 | -1.909424828 | -2.133784031 |
| YOL111C   | 1.4991902    | -1.355035542 | 1.679746449  |
| YOL112W   | -0.014773962 | 0.755032086  | -0.016215967 |
| YOL113W   | 0.241850751  | -0.030993004 | 0.255368246  |
| YOL114C   | -0.020626738 | 0.08197681   | -0.019782435 |
| YOL115W   | 0.529981343  | 1.339371783  | 0.458199482  |
| YOL116W   | 0.527408677  | 0.899133731  | 0.631103858  |
| YOL117W   | 0.244486819  | -0.247901744 | 0.279014715  |
| YOL118C   | 0.231920629  | 0.29107838   | 0.189664193  |
| YOL119C   | -0.019789578 | 0.426486849  | -0.026131964 |
| YOL120C   | 6.963788217  | 2.139341066  | 1.457682503  |
| YOL121C   | 6.543722805  | 2.699312486  | 2.422171807  |
| YOL122C   | 0.90230399   | -2.498363296 | 0.864825922  |
| YOL123W   | -1.739253404 | -1.020343051 | -1.761001426 |
| YOL124C   | 0.273369629  | -1.267775744 | 0.279153585  |
| YOL125W   | -0.46009349  | -0.063924719 | -0.60803061  |
| YOL126C   | 0.005817731  | 0.480126244  | 0.006654521  |
| YOL127W   |              |              |              |
| YOL128C   | 0.097591841  | -0.000333771 | 0.113686621  |
| YOL129W   | 0.107496523  | 0.24963353   | 0.130333062  |
| YOL130W   | -0.454955143 | -0.008187955 | -0.474165426 |
| YOL131W   | 0.017420394  | 0.429693897  | 0.027268625  |
| YOL132W   | -1.443019607 | -1.516718321 | -1.745034837 |
| YOL133W   | 0.438656679  | 0.152132738  | 0.405577932  |
| YOL134C   | -0.054754458 | -0.048297584 | -0.058520494 |
| YOL135C   | -0.772516658 | -1.530673839 | -0.663112369 |
| YOL136C   | -0.471939334 | -0.371534366 | -0.509202219 |
| YOL137W   | 0.030196494  | 0.828452441  | 0.036948094  |
| YOL138C   | 1.00586553   | 0.610012431  | 1.149443261  |
| YOL139C   | 0.152721283  | 1.294013812  | 0.162501489  |
| YOL140W   |              |              |              |
| YOL141W   | -0.114460773 | 0.095243435  | -0.153019763 |
| YOL142W   |              |              |              |
| YOL143C   | -0.069118866 | -0.101730765 | -0.10013397  |
| YOL144W   | -0.095697078 | -0.204839936 | -0.114072417 |
| YOL145C   |              |              |              |
| YOL146W   | 0.383745025  | -0.848317426 | 0.361764874  |

|           |              |              |              |
|-----------|--------------|--------------|--------------|
| YOL147C   | -0.027668434 | 0.377460775  | -0.027529494 |
| YOL148C   | -0.136516647 | 1.831210542  | -0.053617565 |
| YOL149W   | 4.501929206  | -0.019641101 | 4.36624288   |
| YOL150C   | -0.075600983 | 1.828664331  | -0.076567954 |
| YOL151W   | -0.009575717 | 0.06853044   | -0.011940039 |
| YOL152W   | -0.644968211 | 0.009287091  | -0.84659992  |
| YOL153C   | 0.050397158  | 0.189700738  | 0.047145955  |
| YOL154W   |              |              |              |
| YOL155C   | -0.07410893  | -0.013663837 | -0.081608699 |
| YOL155W-A |              |              |              |
| YOL156W   |              |              |              |
| YOL157C   |              |              |              |
| YOL158C   | 0.02491965   | 0.539054093  | 0.032574541  |
| YOL159C   | -4.943322855 | -2.711783494 | -2.666688    |
| YOL159C-A |              |              |              |
| YOL160W   | -1.291688077 | -0.019720042 | -1.236960598 |
| YOL161C   |              |              |              |
| YOL162W   | -0.129891913 | -3.920028052 | -0.111332274 |
| YOL163W   | -2.582111463 | -2.075891629 | -1.799535129 |
| YOL164W   |              |              |              |
| YOL164W-A |              |              |              |
| YOL165C   |              |              |              |
| YOL166C   | 1.430977217  | 0.522114656  | 1.27249147   |
| YOL166W-A |              |              |              |
| YOR001W   | 2.309248093  | 3.092210994  | 1.019900401  |
| YOR002W   | 0.276684278  | 0.072742173  | 0.262394428  |
| YOR003W   | 0.203344113  | 0.218562756  | 0.23466441   |
| YOR004W   | 0.212504636  | -0.059238152 | 0.169220757  |
| YOR005C   | -0.353689397 | -0.570300669 | -0.322422346 |
| YOR006C   | 0.501774094  | -0.056558629 | 0.485239473  |
| YOR007C   | 0.483348897  | 0.109840826  | 0.701568368  |
| YOR008C   | 0.038708249  | 0.071747441  | 0.040303442  |
| YOR008C-A | 0.180832798  | -0.034082193 | 0.144954117  |
| YOR008W-B |              |              |              |
| YOR009W   | 0.950907534  | 0.05144419   | 0.780461312  |
| YOR010C   | -0.027175176 | -0.078926693 | -0.03305809  |
| YOR011W   | -0.56195049  | -0.024916177 | -0.53320664  |
| YOR011W-A |              |              |              |
| YOR012W   | 0.006162947  | 1.373242676  | 0.007678541  |
| YOR013W   | 0.225755997  | 0.050794882  | 0.239472739  |
| YOR014W   | -1.910655199 | 1.010777308  | -1.198878651 |
| YOR015W   | -2.702610433 | 0.01975358   | -2.009320338 |
| YOR016C   | 0.00087465   | -2.025221385 | 0.000707079  |
| YOR017W   | 0.095961641  | 0.852308348  | 0.099988444  |
| YOR018W   | -0.00803441  | 0.826011345  | -0.010065635 |
| YOR019W   | 0.035527236  | -0.489204885 | 0.037941163  |
| YOR020C   | 1.902876818  | 0.506860699  | 1.478047543  |
| YOR020W-A |              |              |              |
| YOR021C   | -1.194912719 | 0.044510218  | -1.360495827 |
| YOR022C   | -0.058797502 | 0.043322736  | -0.065082931 |
| YOR023C   | -0.24604294  | -1.648216718 | -0.194816292 |
| YOR024W   | -0.057411115 | 0.020517882  | -0.057913569 |
| YOR025W   | -1.300008992 | 0.125065919  | -1.069899548 |

|           |              |              |              |
|-----------|--------------|--------------|--------------|
| YOR026W   | 0.021434935  | 0.261449633  | 0.0125956    |
| YOR027W   | 0.031211146  | 0.055521034  | 0.02803022   |
| YOR028C   | 0.615380713  | -1.32513922  | 0.662215837  |
| YOR029W   | 0.957292366  | -0.984217055 | 0.905635122  |
| YOR030W   | 0.038117822  | 0.052772464  | 0.038189912  |
| YOR031W   | -0.032456561 | -0.114314229 | -0.031136025 |
| YOR032C   | -0.593618009 | -0.144302776 | -0.628893786 |
| YOR032W-A |              |              |              |
| YOR033C   | 0.09817219   | 0.773583216  | 0.11156149   |
| YOR034C   | 0.008926193  | 0.070681277  | 0.011249937  |
| YOR034C-A |              |              |              |
| YOR035C   | 0.086514498  | -0.020570323 | 0.079480313  |
| YOR036W   | -0.218135676 | -1.683447228 | -0.182159147 |
| YOR037W   | 0.05303395   | -1.353297544 | 0.051759328  |
| YOR038C   | -0.020971544 | 0.163261214  | -0.016013795 |
| YOR039W   | 0.115626612  | -0.112340139 | 0.10113178   |
| YOR040W   | -0.02534495  | -0.13203767  | -0.028241053 |
| YOR041C   | 0.572750188  | -0.083714667 | 0.544497133  |
| YOR042W   | -0.02007275  | -0.076021428 | -0.025263296 |
| YOR043W   | -2.296216912 | -0.646033829 | -1.527947871 |
| YOR044W   | 0.052423921  | 0.412863905  | 0.057794435  |
| YOR045W   | 0.39437813   | 0.091513911  | 0.549021433  |
| YOR046C   | 1.213591915  | -1.506147763 | 0.784218058  |
| YOR047C   | 0.08917068   | 2.485250938  | 0.100673617  |
| YOR048C   | 0.074591274  | -0.115751407 | 0.05842442   |
| YOR049C   | 1.774632094  | -1.627728885 | 1.608496734  |
| YOR050C   | 0.003587592  | -0.142717902 | 0.003263127  |
| YOR051C   | -0.521018778 | 0.109983957  | -0.581033331 |
| YOR052C   | 0.591992888  | 1.547448088  | 0.585811183  |
| YOR053W   | -1.235607459 | 1.150826718  | -1.460475224 |
| YOR054C   | -0.157365797 | 0.484949566  | -0.125741653 |
| YOR055W   | 0.092750387  | -0.502038281 | 0.087539509  |
| YOR056C   | 0.025616364  | 0.216584342  | 0.020882094  |
| YOR057W   | -1.48826438  | -3.418144228 | -1.178630481 |
| YOR058C   | 0.028252307  | 0.895452729  | 0.032822054  |
| YOR059C   | 0.055478332  | 0.018436465  | 0.060032389  |
| YOR060C   | -0.413035096 | -0.277420487 | -0.342107101 |
| YOR061W   | 1.982516729  | 0.97506716   | 1.904096687  |
| YOR062C   | -0.00079203  | -0.053853438 | -0.001232877 |
| YOR063W   | 0.089650224  | 0.167813934  | 0.084529727  |
| YOR064C   | 0.749848798  | 0.176030625  | 0.798704743  |
| YOR065W   | 2.334013344  | 0.723662845  | 2.258349026  |
| YOR066W   | -0.001810142 | 0.009230552  | -0.002075844 |
| YOR067C   | -0.06029354  | 0.135377195  | -0.07428766  |
| YOR068C   | -0.086634613 | 0.005935882  | -0.075319231 |
| YOR069W   | -0.226965391 | -0.182503789 | -0.211164086 |
| YOR070C   | 1.151215191  | 1.18215509   | 1.375903844  |
| YOR071C   | 0.643673712  | 0.108087616  | 0.74858635   |
| YOR072W   | 0.150519025  | 0.529735647  | 0.10271426   |
| YOR072W-A |              |              |              |
| YOR072W-B |              |              |              |
| YOR073W   | 0.018046739  | 0.064741007  | 0.021151075  |
| YOR073W-A |              |              |              |

|           |              |              |              |
|-----------|--------------|--------------|--------------|
| YOR074C   | -0.039688395 | 0.084043303  | -0.044504112 |
| YOR075W   | -1.107501626 | -0.342112795 | -1.518989265 |
| YOR076C   | -7.12E-05    | -0.001508864 | -9.82E-05    |
| YOR077W   | 0.448504293  | -3.149970717 | 0.469677053  |
| YOR078W   | 0.945300554  | 0.542006696  | 0.769645499  |
| YOR079C   | 0.034631195  | 0.92021105   | 0.049611486  |
| YOR080W   | 0.107617903  | -0.248634145 | 0.150888248  |
| YOR081C   | 0.176470439  | 0.064594252  | 0.229075068  |
| YOR082C   | -0.23171012  | 0.373875603  | -0.307424789 |
| YOR083W   | 0.596124811  | -0.202114759 | 0.690285255  |
| YOR084W   | -0.721458634 | -0.098688933 | -0.660805812 |
| YOR085W   | 0.018327902  | -0.942855696 | 0.022012414  |
| YOR086C   | 1.235014382  | -0.519287669 | 1.45112333   |
| YOR087W   | 1.067534515  | -1.188278386 | 1.069529082  |
| YOR088W   | -0.054794939 | 0.655468574  | -0.074621451 |
| YOR089C   | 0.96315223   | 0.037437537  | 0.942253737  |
| YOR090C   | 0.227992256  | 0.908656364  | 0.397673785  |
| YOR091W   | -0.107125059 | 0.001360408  | -0.095186267 |
| YOR092W   | 0.016324538  | 0.258554672  | 0.012923231  |
| YOR093C   | -0.037455787 | -0.222563207 | -0.04451894  |
| YOR094W   | 0.270056859  | -0.718829937 | 0.301518171  |
| YOR095C   | 0.455270323  | 1.945483183  | 0.404739731  |
| YOR096W   |              |              |              |
| YOR097C   | 1.190740141  | -1.720079999 | 1.218950126  |
| YOR098C   | 0.117442507  | 1.533786293  | 0.123168981  |
| YOR099W   | -0.60024196  | -0.003342034 | -0.725683719 |
| YOR100C   | 0.37452428   | 0.014395566  | 0.42588451   |
| YOR101W   | -0.102611472 | -0.176752151 | -0.119548459 |
| YOR102W   | -0.431392106 | -1.135700959 | -0.358184436 |
| YOR103C   | 0.010138365  | 0.00534539   | 0.010871758  |
| YOR104W   | 0.197930542  | 0.416696073  | 0.221662031  |
| YOR105W   | 0.014576112  | -0.121317898 | 0.01853753   |
| YOR106W   | -0.815288644 | -0.234844627 | -0.869717808 |
| YOR107W   | -0.534283709 | 0.087213679  | -0.537705348 |
| YOR108C-A |              |              |              |
| YOR108W   | 0.150477929  | 0.279189381  | 0.195997042  |
| YOR109W   | 0.256587733  | 0.288645958  | 0.318943306  |
| YOR110W   | 1.257927897  | 0.08458357   | 1.74228184   |
| YOR111W   | -0.079449971 | -0.045715886 | -0.109311488 |
| YOR112W   | -0.00321499  | 0.010200238  | -0.003353536 |
| YOR113W   | -0.216556487 | -0.095462735 | -0.229605682 |
| YOR114W   | -0.722652537 | 0.142847256  | -0.87346615  |
| YOR115C   | -0.891901098 | 0.074138482  | -0.940709361 |
| YOR116C   | 8.74308066   | 5.763558681  | 4.15370458   |
| YOR117W   | 3.350311241  | 3.626226768  | 2.808996719  |
| YOR118W   | -2.657187685 | -0.123730628 | -2.855116163 |
| YOR119C   | 0.079741927  | -1.890085255 | 0.083245093  |
| YOR120W   | 1.207595477  | 0.309417727  | 0.993887628  |
| YOR121C   | 0.738595427  | -1.571979767 | 0.790392761  |
| YOR122C   | 0.024661204  | 0.237089535  | 0.030243583  |
| YOR123C   | -3.232260182 | -1.058812932 | -2.641064901 |
| YOR124C   | 0.005651085  | 1.484258121  | 0.00821794   |
| YOR125C   | 5.769537694  | 2.875826632  | 3.588887618  |



|           |              |              |              |
|-----------|--------------|--------------|--------------|
| YOR126C   | -0.001410411 | 0.117592182  | -0.001605951 |
| YOR127W   | 1.047560748  | -1.182650193 | 0.88040343   |
| YOR128C   | 0.02604805   | -0.290578586 | 0.019753357  |
| YOR129C   | 0.078696761  | -0.047129664 | 0.069560674  |
| YOR130C   | -0.006055881 | 0.008924392  | -0.005960709 |
| YOR131C   | -0.75239142  | -2.622298792 | -0.41390249  |
| YOR132W   | -2.692037386 | -0.132876676 | -2.579324206 |
| YOR133W   | 0.004518594  | -0.041307566 | 0.004292643  |
| YOR134W   | -0.136609951 | -3.282360708 | -0.126516721 |
| YOR135C   | 0.992386388  | -0.029817823 | 0.99844196   |
| YOR136W   | 1.859745502  | -1.169111537 | 1.487478752  |
| YOR137C   | -0.102238868 | 1.23136141   | -0.106319455 |
| YOR138C   | 0.118293523  | 0.020395141  | 0.142670386  |
| YOR139C   | -2.570421006 | 1.408118717  | -1.728336537 |
| YOR140W   | -0.955802891 | -1.300354594 | -0.556898806 |
| YOR141C   | -0.34659093  | -0.145715788 | -0.329399115 |
| YOR142W   | -0.020632444 | -0.010652287 | -0.017193889 |
| YOR143C   | -8.66E-06    | -0.25905472  | -8.91E-06    |
| YOR144C   | 0.651272305  | 0.226516978  | 0.804567692  |
| YOR145C   | 2.282216581  | 2.30876143   | 1.359829641  |
| YOR146W   | 0.084366054  | 2.482578556  | 0.043128851  |
| YOR147W   | -0.934333778 | -0.465155346 | -1.024591466 |
| YOR148C   | -0.220497277 | -0.031863558 | -0.264764779 |
| YOR149C   | -0.393026053 | 1.616205399  | -0.318784435 |
| YOR150W   | 0.09200597   | -0.006573792 | 0.112565743  |
| YOR151C   | -4.814296391 | -0.385127187 | -4.548416992 |
| YOR152C   | -0.636104745 | -0.055580055 | -0.800229241 |
| YOR153W   | -45.37550642 | -9.507085567 | -7.078284941 |
| YOR154W   | 0.279545202  | -0.128273415 | 0.263615626  |
| YOR155C   | 0.010473626  | -0.4901438   | 0.013089305  |
| YOR156C   | 0.064847179  | 0.050369508  | 0.067329879  |
| YOR157C   | 5.213626296  | 1.92950524   | 3.329349565  |
| YOR158W   | 0.341456391  | 0.004387987  | 0.342649026  |
| YOR159C   | 1.219687534  | 0.204057803  | 1.186511098  |
| YOR160W   | 0.284674011  | -0.701899484 | 0.323160005  |
| YOR161C   | 0.041959399  | 0.894708088  | 0.042486815  |
| YOR161C-C |              |              |              |
| YOR161W-A |              |              |              |
| YOR161W-B |              |              |              |
| YOR162C   | -0.049520775 | 0.666968662  | -0.06732484  |
| YOR163W   | -0.011963711 | 0.159019116  | -0.009827935 |
| YOR164C   | -2.670595108 | -0.504935086 | -2.507916488 |
| YOR165W   | 0.020334514  | -0.053500568 | 0.024647213  |
| YOR166C   | 0.010419213  | -0.05900078  | 0.017382319  |
| YOR167C   | -2.5213792   | -0.241078806 | -3.477670444 |
| YOR168W   | 2.38847081   | 0.198123538  | 2.910829553  |
| YOR169C   | 0.124480565  | -0.885661064 | 0.160655964  |
| YOR170W   | 0.267174282  | -0.11771258  | 0.268368418  |
| YOR171C   | 0.416962291  | -0.208518962 | 0.428136198  |
| YOR172W   | 0.019316915  | 0.004021322  | 0.021211135  |
| YOR173W   | -0.410398736 | -0.07339796  | -0.419229817 |
| YOR174W   | -1.78447559  | 2.706552512  | -1.265238203 |
| YOR175C   | 0.233191589  | 0.142188313  | 0.279470954  |

|           |              |              |              |
|-----------|--------------|--------------|--------------|
| YOR176W   | -0.052355265 | -0.839578075 | -0.067025951 |
| YOR177C   | -0.052872687 | -1.13156197  | -0.054294098 |
| YOR178C   | 0.379709429  | -0.43548427  | 0.242931633  |
| YOR179C   | -0.029840092 | 0.017527532  | -0.033107886 |
| YOR180C   | 0.019027552  | 0.013515434  | 0.018126299  |
| YOR181W   |              | -0.32390449  |              |
| YOR182C   | -11.29689273 |              | -1.477911353 |
| YOR183W   | 2.50761123   | 0.788502497  | 1.377924066  |
| YOR184W   | 0.205082052  | -0.255862012 | 0.205334393  |
| YOR185C   | -0.114634285 | -1.634217737 | -0.09611135  |
| YOR186C-A |              |              |              |
| YOR186W   |              |              |              |
| YOR187W   | 0.619470323  | -0.446514342 | 0.572627837  |
| YOR188W   | -0.019981296 | 0.475149701  | -0.018237669 |
| YOR189W   | 0.064095486  | -0.642858853 | 0.079344018  |
| YOR190W   | -0.00602631  | -0.05048976  | -0.008324974 |
| YOR191W   | 0.016967466  | 0.025521626  | 0.019100291  |
| YOR192C   | 0.257874169  | -0.281994613 | 0.200897558  |
| YOR192C-C |              |              |              |
| YOR193W   | -0.912890699 | 0.121404293  | -0.981649875 |
| YOR194C   | -2.625730576 | -0.864107741 | -3.065439844 |
| YOR195W   | -0.744835921 | -0.381900685 | -0.839478211 |
| YOR196C   | 0.406030246  | -0.231968587 | 0.512592681  |
| YOR197W   | -0.021445775 | -0.033683926 | -0.030748529 |
| YOR198C   | -1.321640141 | 0.341416652  | -1.283022532 |
| YOR199W   | -0.466019099 | 0.071906935  | -0.550364154 |
| YOR200W   | 0.007159956  | 0.749685725  | 0.008941626  |
| YOR201C   | 0.764049865  | 0.30136212   | 1.101956737  |
| YOR202W   | 14.67843662  | 0.931696801  | 4.517715835  |
| YOR203W   | -5.479837566 | -2.629919722 | -4.254358231 |
| YOR204W   | -6.263894714 | -3.907551363 | -5.403921142 |
| YOR205C   | 0.146003238  | 0.022371995  | 0.142943174  |
| YOR206W   | 3.620434717  | 7.00088623   | 1.185323376  |
| YOR207C   | 6.196309153  | 4.316852338  | 2.74302275   |
| YOR208W   | -0.025735638 | -0.221338082 | -0.022139145 |
| YOR209C   | -0.056473411 | -1.504465969 | -0.053601205 |
| YOR210W   | 1.99278341   | 3.091076597  | 0.991318925  |
| YOR211C   | -0.346031397 | -0.049266665 | -0.390750479 |
| YOR212W   | 0.056962918  | -0.279248209 | 0.056701048  |
| YOR213C   | -0.154596534 | 0.086300707  | -0.196962449 |
| YOR214C   | -0.002127809 | 0.033602025  | -0.002596032 |
| YOR215C   | 0.003781481  | 0.00643835   | 0.005675072  |
| YOR216C   | 0.964631935  | -0.006788511 | 1.045596572  |
| YOR217W   | 0.387412452  | -1.318198778 | 0.400844523  |
| YOR218C   | 1.793512712  | 0.130442214  | 1.719012126  |
| YOR219C   | 0.898486174  | 0.162820873  | 0.553587917  |
| YOR220W   | -0.060456921 | -0.006654306 | -0.058328774 |
| YOR221C   | -1.858585499 | -0.833067697 | -1.766908412 |
| YOR222W   | -1.618874117 | -2.102184091 | -1.281242514 |
| YOR223W   | -0.375382524 | 0.138858012  | -0.451325515 |
| YOR224C   | 6.482191985  | 3.521470769  | 1.473266196  |
| YOR225W   | -0.37569221  | -0.996778547 | -0.402358799 |
| YOR226C   | -0.142315066 | -0.03564514  | -0.190318556 |

|           |              |              |              |
|-----------|--------------|--------------|--------------|
| YOR227W   | -0.098609399 | -0.024420524 | -0.099720251 |
| YOR228C   | 0.399783191  | 0.058362641  | 0.461221531  |
| YOR229W   | -1.461228022 | -0.890978219 | -1.727251051 |
| YOR230W   | 0.036845685  | -0.317039507 | 0.031713268  |
| YOR231C-A |              |              |              |
| YOR231W   | -1.728296816 | 0.151139205  | -1.284937123 |
| YOR232W   | 0.667187563  | -0.121393231 | 0.516712982  |
| YOR233W   | 0.023193967  | -0.042337695 | 0.019634515  |
| YOR234C   | -0.010216313 | -0.029591958 | -0.007471812 |
| YOR235W   | -0.874946797 | -2.018240615 | -0.789832577 |
| YOR236W   | 0.363028477  | -0.30208803  | 0.509540027  |
| YOR237W   | -0.094138466 | -0.179152734 | -0.120650118 |
| YOR238W   | -0.00745964  | 0.562307486  | -0.009708055 |
| YOR239W   | -0.032798458 | -1.447701114 | -0.037439422 |
| YOR240W   | -1.34476681  | 0.029915705  | -1.957226358 |
| YOR241W   | -0.088744484 | 0.163695554  | -0.106906458 |
| YOR242C   | -0.037213111 | -0.770305043 | -0.044280005 |
| YOR243C   | 0.071046751  | 0.053843899  | 0.093313682  |
| YOR244W   | 0.033752177  | -0.079496546 | 0.031055664  |
| YOR245C   | -0.047468019 | 0.003416352  | -0.054476476 |
| YOR246C   | -0.225475575 | 0.006296495  | -0.280128936 |
| YOR247W   | 0.703651585  | 0.002786452  | 0.712098507  |
| YOR248W   | 0.589397216  | -0.077142661 | 0.512365471  |
| YOR249C   | -0.113958788 | 0.054606943  | -0.153178975 |
| YOR250C   | 1.42395749   | 2.10233549   | 0.59175126   |
| YOR251C   | -0.080974973 | 0.616417309  | -0.103315217 |
| YOR252W   | 0.028650856  | 1.204147603  | 0.042365953  |
| YOR253W   | 0.036248976  | -0.054384743 | 0.052223376  |
| YOR254C   | 0.002410693  | -0.05336054  | 0.002889427  |
| YOR255W   | 0.336188636  | 0.547347404  | 0.402776486  |
| YOR256C   | -2.014901145 | -8.973426552 | -1.035762062 |
| YOR257W   | 2.198887921  | -10.8394021  | 0.929060281  |
| YOR258W   | -0.079980796 |              | -0.050054208 |
| YOR259C   | 4.210265064  | 4.539984735  | 3.256890404  |
| YOR260W   | -0.534358854 | -0.130052497 | -0.540529756 |
| YOR261C   | 4.31118786   | 1.086089944  | 4.109644357  |
| YOR262W   | 0.184325966  | 1.635861145  | 0.23597032   |
| YOR263C   | -0.050790253 | -0.000201868 | -0.06019546  |
| YOR264W   | -1.095835177 | -0.054595439 | -1.26706253  |
| YOR265W   | 0.163003244  | 0.314099965  | 0.165844063  |
| YOR266W   | -0.007447488 | -1.079623227 | -0.005500143 |
| YOR267C   | -1.552562972 | -2.133882089 | -1.237726492 |
| YOR268C   | 0.054955592  | -0.001207968 | 0.049289615  |
| YOR269W   | 0.028650566  | 0.030911001  | 0.028134579  |
| YOR270C   | -3.140948291 | -2.117392992 | -3.242778136 |
| YOR271C   | 0.136684444  | 0.049878218  | 0.162699259  |
| YOR272W   | 0.12571309   | 0.891535899  | 0.122553959  |
| YOR273C   | 0.311323016  | 0.080301022  | 0.35249738   |
| YOR274W   | -0.012341932 | -0.192671024 | -0.011188852 |
| YOR275C   | -0.756131674 | -0.017790789 | -0.657867325 |
| YOR276W   | -1.238973446 | -0.523254375 | -1.632533674 |
| YOR277C   | -0.203677408 | 0.052562938  | -0.187646091 |
| YOR278W   | -3.341356235 | -0.005245743 | -2.026225498 |

|           |              |              |              |
|-----------|--------------|--------------|--------------|
| YOR279C   | -0.2979912   | -0.606057874 | -0.322262489 |
| YOR280C   | -0.146126089 | -0.062265214 | -0.189509427 |
| YOR281C   |              |              |              |
| YOR282W   | -0.459683707 | -0.209198251 | -0.541391047 |
| YOR283W   | 0.014752586  | -0.009927698 | 0.018530814  |
| YOR284W   |              | 0.082303805  |              |
| YOR285W   | -0.021283991 | -0.848571539 | -0.027299368 |
| YOR286W   | -0.006511063 | -0.008008694 | -0.008581296 |
| YOR287C   | 0.040845889  | 0.215463027  | 0.019103691  |
| YOR288C   | -0.935466954 | 1.319749967  | -0.834590012 |
| YOR289W   | -1.195086249 | 0.080546209  | -1.417907697 |
| YOR290C   | -0.646366389 | 0.033085635  | -0.479424016 |
| YOR291W   | 0.097571517  | -0.352881187 | 0.093619874  |
| YOR292C   | 2.053950296  | -0.04082265  | 1.860779933  |
| YOR293C-A |              |              |              |
| YOR293W   | 10.73009426  | -0.056882839 | 3.323033332  |
| YOR294W   | 2.138548802  | 1.130708304  | 1.91663623   |
| YOR295W   | 0.129381478  | -0.195173248 | 0.193119594  |
| YOR296W   | 0.091028904  | 0.074143302  | 0.140684012  |
| YOR297C   | -0.015508839 | -0.690609347 | -0.013527949 |
| YOR298C-A | -0.067951614 | 0.076841623  | -0.059063973 |
| YOR298W   | -0.062588022 | -0.130953205 | -0.078116624 |
| YOR299W   | 1.116016086  | 0.094357926  | 1.699321799  |
| YOR300W   | -0.678919755 | -0.01550745  | -0.799636494 |
| YOR301W   | 0.134871038  | 0.376688714  | 0.186614871  |
| YOR302W   | 0.965632136  | 0.750509984  | 1.086631267  |
| YOR303W   | -0.04503315  | -0.052972276 | -0.067828413 |
| YOR304C-A | 0.553656254  | 4.060810464  | 0.39748888   |
| YOR304W   | -0.375143699 | -1.502064315 | -0.336431964 |
| YOR305W   | 0.018433354  | -0.006746385 | 0.02397037   |
| YOR306C   | -0.460592029 | 0.215822971  | -0.481623582 |
| YOR307C   | 0.82855663   | -0.038102931 | 0.774262116  |
| YOR308C   | -0.002717828 | -0.441100144 | -0.00301209  |
| YOR309C   | 2.330242113  | 1.34855046   | 1.442433444  |
| YOR310C   | 1.931888206  | 2.563852099  | 0.720235686  |
| YOR311C   | 0.787069254  | -0.016865446 | 0.737883392  |
| YOR312C   | -0.085035246 | -12.54260227 | -0.024744047 |
| YOR313C   | -0.050242447 | -0.695416394 | -0.05621266  |
| YOR314W   | 0.065559935  | -0.085884359 | 0.066538723  |
| YOR314W-A |              |              |              |
| YOR315W   | -0.249556005 | 0.105673736  | -0.325601881 |
| YOR316C   | -0.71737458  | -0.008448418 | -0.763046194 |
| YOR316C-A |              |              |              |
| YOR317W   | 0.249546748  | -0.0192559   | 0.309298793  |
| YOR318C   |              | 1.371726258  |              |
| YOR319W   | -0.059269359 | -0.014973481 | -0.089364861 |
| YOR320C   |              |              |              |
| YOR321W   | -0.043955997 | -0.169064713 | -0.041840102 |
| YOR322C   | 0.011167651  | -0.32167066  | 0.010323476  |
| YOR323C   | 0.653819721  | 1.060817074  | 0.881269815  |
| YOR324C   | 0.001742072  | 0.004924923  | 0.001737536  |
| YOR325W   | -6.856237656 | -2.908654737 | -3.598677993 |
| YOR326W   | -0.235754459 | 0.226251489  | -0.228247045 |

|           |              |              |              |
|-----------|--------------|--------------|--------------|
| YOR327C   | 1.777621559  | 0.243243452  | 1.343694737  |
| YOR328W   | 0.041842237  | 0.0834603    | 0.053493984  |
| YOR329C   | 0.425006343  | -0.405023852 | 0.557475333  |
| YOR329W-A |              |              |              |
| YOR330C   | 0.196771764  | 1.21E-05     | 0.188039549  |
| YOR331C   | -5.399442782 | -2.961380514 | -2.327968414 |
| YOR332W   | -0.004566574 | -0.477755407 | -0.005449502 |
| YOR333C   | -7.796025662 | -3.240759769 | -5.392993229 |
| YOR334W   | 0.032121469  | -0.21751775  | 0.040460588  |
| YOR335C   | -0.545009684 | 0.512268597  | -0.718930943 |
| YOR335W-A |              |              |              |
| YOR336W   | 0.053523079  | -0.391503841 | 0.057198302  |
| YOR337W   | -0.008370982 | 0.015506087  | -0.008579797 |
| YOR338W   | 0.005366142  | -0.036628486 | 0.005154448  |
| YOR339C   | 0.294034657  | 0.297084376  | 0.30672364   |
| YOR340C   | 2.917672207  | 0.095254843  | 1.954717429  |
| YOR341W   | 4.300265868  | 0.587293846  | 2.871819948  |
| YOR342C   | -0.263457915 | -0.134451947 | -0.256564533 |
| YOR343C   | 0.489013713  | -0.001108818 | 0.705767553  |
| YOR344C   | -0.8742873   | -0.002890257 | -1.104176715 |
| YOR345C   | -4.442311894 | -3.797011838 | -2.874413674 |
| YOR346W   | -0.12990449  | -0.000296606 | -0.160614573 |
| YOR347C   | 0.68481578   | -0.2516094   | 0.780310412  |
| YOR348C   | -0.006337374 | -0.040940126 | -0.008948727 |
| YOR349W   | 0.033399976  | -0.045303592 | 0.046055973  |
| YOR350C   | 0.552295998  | 0.014162339  | 0.710245034  |
| YOR351C   | 0.06023658   | 0.093375011  | 0.070556665  |
| YOR352W   | 0.449262594  | 0.014249363  | 0.523948289  |
| YOR353C   | 1.876635599  | -0.065191451 | 1.643008833  |
| YOR354C   | 0.718759316  | -0.008366537 | 0.895264511  |
| YOR355W   | -2.875535189 | -0.001080931 | -2.949657702 |
| YOR356W   | 2.065569966  | 0.052495636  | 2.461200906  |
| YOR357C   | 0.858521454  | -0.193871355 | 0.890179152  |
| YOR358W   | -0.268097989 | 0.00657245   | -0.270397998 |
| YOR359W   | -4.540782638 | -1.868537664 | -3.292109273 |
| YOR360C   | 0.181596176  | 2.211628521  | 0.200333227  |
| YOR361C   | 0.747894879  | -0.137721853 | 0.888276457  |
| YOR362C   | 8.5076061    | 2.958766294  | 4.993488281  |
| YOR363C   | 0.025764509  | -0.059483469 | 0.029727166  |
| YOR364W   | 2.431996266  | 1.588355038  | 1.900138157  |
| YOR365C   | 0.987402694  | -0.128896043 | 1.09318168   |
| YOR366W   | -5.863523515 | -3.753790185 | -3.100636    |
| YOR367W   |              |              |              |
| YOR368W   | 0.153572864  | -0.10023828  | 0.141775606  |
| YOR369C   | 5.349694968  | -2.133261209 | 2.419813226  |
| YOR370C   | 0.099149586  | -0.012458742 | 0.113762354  |
| YOR371C   | 0.014669987  | 0.020302207  | 0.012705193  |
| YOR372C   | 3.442569363  | 0.94870769   | 3.739898294  |
| YOR373W   | 0.069677842  | 0.104593217  | 0.079216741  |
| YOR374W   | 0.828201579  | -0.022379541 | 0.734137823  |
| YOR375C   | 0.141908287  | -0.25724921  | 0.145452672  |
| YOR376W   | 0.250412355  | -0.024284842 | 0.248885934  |
| YOR376W-A |              |              |              |

|           |              |              |              |
|-----------|--------------|--------------|--------------|
| YOR377W   | -5.194266594 | -0.36356378  | -3.203932588 |
| YOR378W   | 0.22791704   | -0.169119229 | 0.184228737  |
| YOR379C   | -9.176711756 | -5.542216705 | -4.273381583 |
| YOR380W   | 0.001212408  | 0.006986041  | 0.001182857  |
| YOR381W   | 0.180203757  | 0.448031144  | 0.200541598  |
| YOR381W-A |              |              |              |
| YOR382W   | 0.997399228  | 0.054634803  | 0.879575403  |
| YOR383C   | 5.724606418  | 4.004665583  | 3.116792725  |
| YOR384W   | 0.112719601  | 0.887850657  | 0.132955356  |
| YOR385W   | 0.48462175   | 0.021892362  | 0.651495619  |
| YOR386W   | -0.01873971  | -0.498661431 | -0.018003777 |
| YOR387C   |              |              |              |
| YOR388C   |              |              |              |
| YOR389W   |              |              |              |
| YOR390W   |              |              |              |
| YOR391C   |              |              |              |
| YOR392W   |              |              |              |
| YOR393W   |              |              |              |
| YOR394C-A |              |              |              |
| YOR394W   |              |              |              |
| YOR396C-A |              |              |              |
| YOR396W   |              |              |              |
| YPL001W   | -0.054909835 | -0.04905991  | -0.048850031 |
| YPL002C   | 0.079935343  | -0.042563041 | 0.088749699  |
| YPL003W   | 0.633773167  | -0.083693154 | 0.669351527  |
| YPL004C   | -0.022866226 | 0.016343048  | -0.025924743 |
| YPL005W   | -0.317226714 | -0.01833266  | -0.276211566 |
| YPL006W   | 0.424695553  | -0.330587513 | 0.494401333  |
| YPL007C   | 0.436137174  | 0.125782943  | 0.375567299  |
| YPL008W   | 0.003500329  | 0.043694889  | 0.003304264  |
| YPL009C   | 0.013202938  | -0.94356865  | 0.012146809  |
| YPL010W   | 1.292902614  | 0.727639656  | 1.321397277  |
| YPL011C   | 1.24816264   | -1.10959967  | 1.189435971  |
| YPL012W   | 2.461349718  | 1.572041809  | 1.481446489  |
| YPL013C   | 0.335338018  | -1.784659049 | 0.315175137  |
| YPL014W   | -0.026844382 | 0.011409617  | -0.027163338 |
| YPL015C   | 0.041008846  | 0.842080656  | 0.050432565  |
| YPL016W   | -0.00942916  | -1.924666123 | -0.008153445 |
| YPL017C   | 0.483550309  | 1.56118294   | 0.680887667  |
| YPL018W   | -0.029643027 | 0.30040419   | -0.032726791 |
| YPL019C   | 0.322737932  | 0.667499044  | 0.381051044  |
| YPL020C   | 1.001694782  | 0.130274119  | 1.110902139  |
| YPL021W   | 0.065038489  | 0.680202377  | 0.076201516  |
| YPL022W   | 0.969629697  | 0.152517503  | 0.921448277  |
| YPL023C   | 0.617472252  | 1.478974358  | 0.60908059   |
| YPL024W   |              |              |              |
| YPL025C   | 0.350830103  | 0.003179074  | 0.228917894  |
| YPL026C   | 1.860947908  | -0.253799233 | 1.228440179  |
| YPL027W   | -0.029080102 | -0.677603308 | -0.027028788 |
| YPL028W   | 1.045802401  | -0.003660108 | 1.066325891  |
| YPL029W   | 1.106701463  | 0.046798065  | 1.183033673  |
| YPL030W   | 0.143510697  | 0.516748419  | 0.188609887  |
| YPL031C   | 1.495698148  | 1.853349826  | 1.129427381  |

|           |              |              |              |
|-----------|--------------|--------------|--------------|
| YPL032C   | -0.006769383 | -0.005387336 | -0.007079031 |
| YPL033C   | 0.649859525  | 0.119445234  | 0.640104565  |
| YPL034W   | 0.126880192  | -0.016379919 | 0.129090574  |
| YPL035C   | 1.491192401  | -1.610901286 | 1.174849168  |
| YPL036W   | 0.015497703  | -0.042642743 | 0.017906314  |
| YPL037C   | 0.469715258  | 2.273915845  | 0.420867257  |
| YPL038W   | 0.026307718  | 2.433422844  | 0.021308178  |
| YPL038W-A |              |              |              |
| YPL039W   | -0.352341318 | -0.371936662 | -0.361197898 |
| YPL040C   | -0.004164043 | -0.257341301 | -0.004714439 |
| YPL041C   | -0.005937094 |              | -0.004274036 |
| YPL042C   | 3.005716098  | 0.044861575  | 2.456244766  |
| YPL043W   | 6.504101456  | 4.328367955  | 2.788565792  |
| YPL044C   | 2.867517125  | 2.20842919   | 1.589483699  |
| YPL045W   | 0.099705417  | 0.188395717  | 0.097871481  |
| YPL046C   | 0.111659234  | -0.476280839 | 0.143520633  |
| YPL047W   | -1.824768339 | -0.890261508 | -1.541611943 |
| YPL048W   | -0.173328575 | 0.030018422  | -0.15248371  |
| YPL049C   | -0.082014315 | 0.320690159  | -0.08640424  |
| YPL050C   | 2.33728265   | 2.563948149  | 2.133158307  |
| YPL051W   |              |              |              |
| YPL052W   | 0.003993896  | 0.509654035  | 0.005718707  |
| YPL053C   | 0.072514252  | 1.36437921   | 0.074556551  |
| YPL054W   | 0.283007062  | -0.058854068 | 0.371789049  |
| YPL055C   | 1.16840727   | 0.022798305  | 1.421694959  |
| YPL056C   | 2.762768295  | 2.53403166   | 2.904671191  |
| YPL057C   | 3.677530942  | 3.311343502  | 3.537289593  |
| YPL058C   | 0.032377545  | 0.114679045  | 0.049463928  |
| YPL059W   | -0.009407103 | -0.048875436 | -0.014874603 |
| YPL060W   | 0.534487922  | -0.0200503   | 0.540001405  |
| YPL061W   | 0.813315589  | -1.046703505 | 0.96645943   |
| YPL062W   | 0.195304056  | -0.163818685 | 0.223712266  |
| YPL063W   | 0.361196627  | 0.386726599  | 0.387526157  |
| YPL064C   | -0.896696159 | -0.023643153 | -0.823389967 |
| YPL065W   |              | 0.771934013  |              |
| YPL066W   | 0.087086425  | 0.322738888  | 0.124568374  |
| YPL067C   | 0.088491407  | 0.49608574   | 0.127732003  |
| YPL068C   | 0.26354001   | 0.609022307  | 0.243515799  |
| YPL069C   | 0.703610202  | 0.035758536  | 0.8983158    |
| YPL070W   | -0.32683774  | -0.382041373 | -0.295748425 |
| YPL071C   | 0.22147114   | 0.233142024  | 0.214980287  |
| YPL072W   | -0.167821273 | -0.362518187 | -0.16887803  |
| YPL073C   | 1.796034273  | 0.085288625  | 1.884524725  |
| YPL074W   | -1.008175221 | -0.036553472 | -1.1258217   |
| YPL075W   | -0.091805781 | -0.034115402 | -0.08389237  |
| YPL076W   | 0.057332245  | -0.022910295 | 0.055095355  |
| YPL077C   | 0.146697852  | -0.006259231 | 0.158222883  |
| YPL078C   | -0.114713772 | 0.5323527    | -0.123956889 |
| YPL079W   | 0.259951619  | -0.001973126 | 0.171580715  |
| YPL080C   | 1.44476214   | 0.110787629  | 1.064526276  |
| YPL081W   | 0.912664604  | 0.455384434  | 1.096889018  |
| YPL082C   |              |              |              |
| YPL083C   | -0.043959194 | -1.382562059 | -0.037205404 |

|           |              |              |              |
|-----------|--------------|--------------|--------------|
| YPL084W   | -0.190335379 | -0.871960955 | -0.191886044 |
| YPL085W   | 0.168721344  | 0.849398105  | 0.189247863  |
| YPL086C   | -0.038277212 | -0.705003149 | -0.032973849 |
| YPL087W   | 0.360061587  | 1.177856852  | 0.410280403  |
| YPL088W   | 0.228559707  | -0.646986228 | 0.265191153  |
| YPL089C   |              |              |              |
| YPL090C   | 6.454373921  | 2.531544245  | 2.217322819  |
| YPL091W   | 0.009098875  | 0.564197165  | 0.007227102  |
| YPL092W   | -2.40596621  | -0.084050682 | -2.580787637 |
| YPL093W   | 8.299621245  | 5.906524358  | 3.073201241  |
| YPL094C   | -2.937653816 | -0.992179011 | -3.075768966 |
| YPL095C   | -4.481298864 | -0.090530264 | -3.229206924 |
| YPL096C-A |              |              |              |
| YPL096W   | -2.989494269 | -0.091513152 | -3.067268889 |
| YPL097W   | -2.463018932 | -0.518540671 | -2.253073027 |
| YPL098C   | -1.869521867 | -0.037153255 | -1.389474992 |
| YPL099C   | -4.017613218 | -0.160987205 | -4.214828444 |
| YPL100W   | -2.578141397 | -1.478070482 | -2.481222225 |
| YPL101W   | -0.682325182 | 0.003835835  | -0.877947429 |
| YPL102C   | -3.581181305 | 1.189778711  | -2.977779868 |
| YPL103C   | -2.741110217 | -0.198666603 | -3.12912841  |
| YPL104W   | -2.247510594 | -8.758583117 | -1.05153018  |
| YPL105C   | -2.709361945 | 0.722428062  | -2.160574139 |
| YPL106C   | -7.413004905 | -1.491717956 | -6.246446255 |
| YPL107W   | -2.657908874 | -0.036079274 | -3.280498138 |
| YPL108W   | -0.93899938  | -0.261913092 | -1.188594958 |
| YPL109C   | -3.836362341 | -0.11868894  | -2.702579604 |
| YPL110C   | -3.76441087  | -0.06706415  | -2.878458204 |
| YPL111W   | -2.980467973 | -0.112618808 | -2.343417618 |
| YPL112C   | -0.20387246  | 0.13063587   | -0.206247549 |
| YPL113C   | -2.574777297 | -0.040573524 | -1.772859528 |
| YPL114W   | -3.773389021 | -1.825834247 | -3.256889836 |
| YPL115C   | -1.10225601  | 0.143927557  | -0.88744173  |
| YPL116W   | -3.204136759 | 1.474854531  | -2.742446009 |
| YPL117C   | -0.001975615 | 0.225001713  | -0.002069329 |
| YPL118W   | -1.626170973 | 0.003479223  | -2.130807258 |
| YPL119C   | -2.523743313 | 0.105720904  | -2.170763517 |
| YPL119C-A |              |              |              |
| YPL120W   | -2.945207614 | 0.002083784  | -2.613608976 |
| YPL121C   | -4.648280714 | 0.833690433  | -4.158501323 |
| YPL122C   | -0.307297869 | 1.247530933  | -0.274972268 |
| YPL123C   | -2.001648904 | -0.037796285 | -2.154807336 |
| YPL124W   | -3.725047993 | 0.061054015  | -1.682791206 |
| YPL125W   | -3.012014322 | -0.624371696 | -2.817104756 |
| YPL126W   | -4.173811169 | -1.932544677 | -2.997390579 |
| YPL127C   | -0.051373299 | -0.057906665 | -0.041902651 |
| YPL128C   | -3.596659955 | -0.333360777 | -2.658235234 |
| YPL129W   | 1.70984635   | 2.099568303  | 0.606940582  |
| YPL130W   | 0.041915737  | -0.047760222 | 0.056724696  |
| YPL131W   | 2.771810125  | 3.813150531  | 0.840817329  |
| YPL132W   | -0.177688769 | -1.494596254 | -0.165669558 |
| YPL133C   | -0.109351992 | 0.337271392  | -0.188406858 |
| YPL134C   | -0.029914524 | -0.00222991  | -0.042580386 |



|           |              |              |              |
|-----------|--------------|--------------|--------------|
| YPL135C-A |              |              |              |
| YPL135W   | -2.116302518 | -0.096633769 | -2.267276768 |
| YPL136W   | -2.287132131 | -0.167169778 | -2.353008559 |
| YPL137C   | -0.092021163 | -0.299109657 | -0.073156598 |
| YPL138C   | -4.126115294 | -0.161008689 | -3.813641338 |
| YPL139C   | -1.460567226 | 0.7975487    | -1.667816195 |
| YPL140C   | 0.193073297  | -0.141805972 | 0.197231641  |
| YPL141C   | -4.103574905 | -1.13441428  | -3.147525604 |
| YPL142C   | -14.06165143 | -10.8456093  | -2.778640969 |
| YPL143W   | -12.0707617  | -17.32519244 | -2.469415882 |
| YPL144W   | -0.993104667 | 0.992029325  | -0.978593087 |
| YPL145C   | -13.37265586 | -5.617726022 | -8.48795524  |
| YPL146C   | 0.008283988  | 0.882277019  | 0.004548327  |
| YPL147W   | -3.566085007 | -0.088837369 | -3.793577943 |
| YPL148C   | -0.007860998 | 1.515874488  | -0.007180125 |
| YPL149W   | -0.033097477 | -0.584201615 | -0.031315741 |
| YPL150W   | -0.43795043  | 0.033579756  | -0.648930758 |
| YPL151C   | -2.973841678 | -0.781106666 | -3.055217829 |
| YPL152W   | -4.504906231 | -2.413278378 | -4.021568984 |
| YPL152W-A |              |              |              |
| YPL153C   | -2.558441798 | 0.219962149  | -2.598219928 |
| YPL154C   | 0.564678868  | -1.956116216 | 0.610598532  |
| YPL155C   | -0.022994426 | 0.1187133    | -0.031746995 |
| YPL156C   | -3.815226331 | 0.128410141  | -4.183921996 |
| YPL157W   | -1.847561653 | -0.050946726 | -1.092872564 |
| YPL158C   | 0.155725751  | 0.122377238  | 0.181506272  |
| YPL159C   | 4.538816994  | 1.231253557  | 3.548592213  |
| YPL160W   | -0.016395822 | -1.661309704 | -0.019639994 |
| YPL161C   | -3.774835886 | -0.182505136 | -3.532865077 |
| YPL162C   | -6.128875734 | -0.01421797  | -4.525955653 |
| YPL163C   | -0.006356839 | 0.160947296  | -0.006116084 |
| YPL164C   | -1.937588973 | -0.003873262 | -1.774249153 |
| YPL165C   | 5.351164989  | 4.128228462  | 5.349720477  |
| YPL166W   | -2.13343504  | -0.033316169 | -1.755967296 |
| YPL167C   | 0.037449804  | -0.057176135 | 0.045077991  |
| YPL168W   | -3.234549913 | -2.01237972  | -3.377383016 |
| YPL169C   | -0.286271616 | 1.229657847  | -0.212801474 |
| YPL170W   | -2.791934668 | -0.217384495 | -2.472698342 |
| YPL171C   | -3.21714063  | 0.07604813   | -3.790362557 |
| YPL172C   | -2.464484079 | -0.013639977 | -2.760239588 |
| YPL173W   | 0.333390113  | -1.357782815 | 0.377938064  |
| YPL174C   | -3.195976368 | -0.752940337 | -2.911380369 |
| YPL175W   | -0.823098152 | 0.098254654  | -0.999697172 |
| YPL176C   | -7.52198102  | -3.063019823 | -6.057741016 |
| YPL177C   | -0.054725987 | 0.46520176   | -0.057574505 |
| YPL178W   | -4.046752391 | -0.398823257 | -2.453365165 |
| YPL179W   | -2.684266644 | -0.742353532 | -2.895277494 |
| YPL180W   | -0.680379744 | 0.027332996  | -0.583955583 |
| YPL181W   |              |              |              |
| YPL182C   | -4.851950013 | -1.293846065 | -4.026587088 |
| YPL183C   | -0.013888811 | -0.164916468 | -0.012396609 |
| YPL183W-A | -0.219909004 | -0.248740863 | -0.230735819 |
| YPL184C   | 0.576976651  | 0.354385731  | 0.744866476  |

|           |              |              |              |
|-----------|--------------|--------------|--------------|
| YPL185W   | -1.66583623  | -0.288232114 | -1.909091961 |
| YPL186C   | 0.034669724  | 0.307928492  | 0.046200418  |
| YPL187W   | -2.74006839  | -0.373975949 | -2.188820658 |
| YPL188W   | -1.320336205 | -0.037428033 | -1.626397868 |
| YPL189C-A |              |              |              |
| YPL189W   | -0.919948664 | -0.011128402 | -0.961499407 |
| YPL190C   | 0.484883992  | 1.128418574  | 0.580765622  |
| YPL191C   | 0.01742795   | 0.146353405  | 0.02049307   |
| YPL192C   | -0.143235251 | -2.024659853 | -0.155106606 |
| YPL193W   | -0.39748423  | 0.011025525  | -0.332532612 |
| YPL194W   | -0.122521934 | -0.116104025 | -0.174265146 |
| YPL195W   | -0.475028312 | -0.895360212 | -0.313258046 |
| YPL196W   | -0.008130182 | 0.002318003  | -0.010421715 |
| YPL197C   | 0.216853862  | 0.117085222  | 0.169694758  |
| YPL198W   | 0.030282116  | 0.606747821  | 0.052590139  |
| YPL199C   | -0.008138242 | -0.906151626 | -0.008711919 |
| YPL200W   | 0.356331791  | 0.059029315  | 0.412579844  |
| YPL201C   | -0.870643324 | -0.069021249 | -0.995748686 |
| YPL202C   | -4.360882977 | -4.232042555 | -2.012347952 |
| YPL203W   | 0.068764332  | -0.017025583 | 0.077283095  |
| YPL204W   | -0.028683188 | -0.081832549 | -0.017957277 |
| YPL205C   | -0.045749923 | 0.536308713  | -0.027589876 |
| YPL206C   | -0.031338501 | -0.218603359 | -0.030406879 |
| YPL207W   | -0.192833986 | -0.069006309 | -0.150597147 |
| YPL208W   | -0.002942402 | -0.049023387 | -0.003040267 |
| YPL209C   | -0.029182197 | -0.406449952 | -0.016612928 |
| YPL210C   | 0.330214989  | 0.350530146  | 0.36719665   |
| YPL211W   | -4.047093678 | -0.107946343 | -4.772801072 |
| YPL212C   | 0.011240875  | -0.048590223 | 0.014268233  |
| YPL213W   | 0.014449691  | 0.819947752  | 0.019190964  |
| YPL214C   | -0.506712567 | -0.925300689 | -0.552266189 |
| YPL215W   | 0.007495023  | -0.018751706 | 0.010051792  |
| YPL216W   | 0.082833188  | -0.42312073  | 0.085758088  |
| YPL217C   | -0.047016019 | -0.122132219 | -0.052766199 |
| YPL218W   | 2.217384384  | 2.340413158  | 1.893140323  |
| YPL219W   | 0.138204887  | -0.658045485 | 0.152383144  |
| YPL220W   | -0.009625572 | 0.038667112  | -0.012396297 |
| YPL221W   | -0.01603961  | -0.088848757 | -0.016430891 |
| YPL222C-A |              |              |              |
| YPL222W   | 0.062904923  | 0.488426394  | 0.084575567  |
| YPL223C   | 0.601843741  | 0.123438959  | 0.847077187  |
| YPL224C   | -0.061801207 | -1.254501893 | -0.051200719 |
| YPL225W   | -0.008722569 | -0.315512498 | -0.007572958 |
| YPL226W   | -0.120073689 | -0.305188137 | -0.177658205 |
| YPL227C   | -4.35873716  | 0.186172594  | -1.625256908 |
| YPL228W   | 0.723955628  | -0.056917429 | 0.570765411  |
| YPL229W   | 0.035350852  | -0.394084076 | 0.03377957   |
| YPL230W   | -0.192574714 | -1.900932795 | -0.190656119 |
| YPL231W   | -0.162133258 | -0.020026421 | -0.179961661 |
| YPL232W   | 1.433713689  | -0.249604797 | 1.43727815   |
| YPL233W   | 4.544445545  | 4.001188573  | 2.012058216  |
| YPL234C   | -0.851893122 | -3.187057637 | -0.550217088 |
| YPL235W   | 0.842466847  | 2.58174075   | 0.379588142  |

|           |              |              |              |
|-----------|--------------|--------------|--------------|
| YPL236C   | -0.003515515 | -0.016483903 | -0.004116398 |
| YPL237W   | -22.98667909 | -31.04278341 | -9.80743523  |
| YPL238C   | -21.29559761 | -38.37593637 | -8.014003285 |
| YPL239W   | 0.537353356  | -0.112736419 | 0.664922661  |
| YPL240C   | -0.008034397 | -0.04057565  | -0.009187981 |
| YPL241C   | 0.061187973  | -0.019795144 | 0.077227271  |
| YPL242C   | 0.190481295  | 0.358797661  | 0.142250094  |
| YPL243W   | -0.038118834 | 0.039979561  | -0.028088523 |
| YPL244C   | 0.020281434  | 1.440258565  | 0.015402876  |
| YPL245W   | 0.16820084   | 2.098636984  | 0.117294744  |
| YPL246C   | 3.039417404  | 0.171217127  | 2.32095361   |
| YPL247C   | 0.188339595  | -0.033582683 | 0.261498118  |
| YPL248C   | -0.063047664 | -0.03290444  | -0.08966076  |
| YPL249C   | -0.073420468 | 0.132077656  | -0.103003621 |
| YPL249C-A |              |              |              |
| YPL250C   | -0.490276337 | -0.147720803 | -0.549775029 |
| YPL250W-A |              |              |              |
| YPL251W   | 4.162413208  | 5.483282178  | 2.143923244  |
| YPL252C   | -0.357690941 | -0.072710871 | -0.33061368  |
| YPL253C   | -0.140550107 | 0.249871094  | -0.140462816 |
| YPL254W   | -0.221392458 | -0.339052331 | -0.181351543 |
| YPL255W   | 0.5922016    | 0.126001991  | 0.673771546  |
| YPL256C   | -0.014148284 | 0.03136357   | -0.021240032 |
| YPL257W   | -0.018229821 | -0.021978153 | -0.021490501 |
| YPL258C   | -0.007434504 | 1.010085555  | -0.011259837 |
| YPL259C   | -0.440988951 | -0.006300931 | -0.563473783 |
| YPL260W   | 1.744463632  | 0.410059531  | 1.787874269  |
| YPL261C   | 1.895566937  | 0.504547672  | 1.908575908  |
| YPL262W   | 1.631911968  | -0.215977223 | 1.413441381  |
| YPL263C   | -1.210189984 | 0.000942632  | -1.327529844 |
| YPL264C   | -0.025269553 | -0.091707037 | -0.032364903 |
| YPL265W   | 0.680829618  | 0.042593495  | 0.521104773  |
| YPL266W   | 0.046039644  | -0.053451276 | 0.046322333  |
| YPL267W   | 0.186099061  | 0.715805348  | 0.234228862  |
| YPL268W   | 0.00746548   | -0.089180644 | 0.007170749  |
| YPL269W   | 0.300641484  | -0.550790641 | 0.347753024  |
| YPL270W   | 0.566143207  | 0.557718918  | 0.689858503  |
| YPL271W   | 0.024032567  | -0.160951531 | 0.017495274  |
| YPL272C   | -3.427692714 | -4.237744702 | -2.673710169 |
| YPL273W   | -6.639277503 | -5.250084852 | -2.391321904 |
| YPL274W   | 0.125312374  | 1.128899104  | 0.125045487  |
| YPL277C   |              |              |              |
| YPL278C   |              |              |              |
| YPL279C   |              |              |              |
| YPL280W   |              |              |              |
| YPL281C   |              |              |              |
| YPL282C   |              |              |              |
| YPL283C   |              |              |              |
| YPL283W-A |              |              |              |
| YPL283W-B |              |              |              |
| YPR001W   | 0.04433493   | 0.008945776  | 0.048194659  |
| YPR002C-A |              |              |              |
| YPR002W   | 1.268045679  | 0.069582458  | 1.163383873  |

|           |              |              |              |
|-----------|--------------|--------------|--------------|
| YPR003C   | 0.0050719    | -0.872584152 | 0.004620236  |
| YPR004C   | 0.100749612  | -0.027297088 | 0.093459377  |
| YPR005C   |              |              |              |
| YPR006C   | -0.009221984 | 1.268218228  | -0.01103422  |
| YPR007C   | -0.608031345 | 0.56396864   | -0.646326312 |
| YPR008W   | -0.317033922 | -0.034301897 | -0.355131081 |
| YPR009W   | 0.074310046  | 0.591248397  | 0.08916365   |
| YPR010C   | -0.050665307 | 0.042263274  | -0.067538753 |
| YPR010C-A |              |              |              |
| YPR011C   | 0.031627544  | 1.276042599  | 0.04704799   |
| YPR012W   | 0.268959764  | 0.879600022  | 0.344299102  |
| YPR013C   | -0.514057614 | -0.037037039 | -0.383778601 |
| YPR014C   | 0.106578257  | -0.378589856 | 0.143420548  |
| YPR015C   | 0.059685533  | 0.564071748  | 0.084726499  |
| YPR016C   | 2.971709288  | 4.585549656  | 1.403134221  |
| YPR016W-A |              |              |              |
| YPR017C   | 0.09695498   | 0.231423614  | 0.146598871  |
| YPR018W   | -0.343770785 | 0.03884314   | -0.328942777 |
| YPR019W   | -0.094812109 | 0.139478365  | -0.102524064 |
| YPR020W   | -0.029864706 | 1.078957538  | -0.041585037 |
| YPR021C   | 0.837820778  | 2.210505648  | 0.39529343   |
| YPR022C   | -0.069309898 | 0.622466711  | -0.081400649 |
| YPR023C   | 0.775050422  | 0.650703026  | 1.083984081  |
| YPR024W   | -0.765786582 | -0.088436497 | -0.88768328  |
| YPR025C   | 1.146743514  | 0.172381278  | 1.530573914  |
| YPR026W   | 0.050496724  | 0.005672414  | 0.069346084  |
| YPR027C   | 0.085091309  | 1.16668858   | 0.114476689  |
| YPR028W   | -0.001817342 | 0.036691522  | -0.002014782 |
| YPR029C   | -0.396319592 | -0.797142175 | -0.490260055 |
| YPR030W   | -0.067947483 | 0.760577604  | -0.072782087 |
| YPR031W   | -0.039762489 | 0.33169068   | -0.044062631 |
| YPR032W   | 0.015499776  | 0.031762381  | 0.022566217  |
| YPR033C   | 1.612826293  | 0.227773921  | 1.539692565  |
| YPR034W   | 3.407559828  | 1.364201514  | 1.32901221   |
| YPR035W   | 0.035184698  | 1.413097719  | 0.045096844  |
| YPR036W   |              |              |              |
| YPR036W-A |              |              |              |
| YPR037C   | 0.205599557  | 1.20949368   | 0.239613061  |
| YPR038W   | -0.596598668 | -0.111176628 | -0.830147592 |
| YPR039W   | 0.888868878  | -0.008957527 | 1.144337892  |
| YPR040W   | 0.014299299  | 1.272401392  | 0.017229224  |
| YPR041W   | -22.55343148 | -19.48338632 | -19.6447778  |
| YPR042C   | 0.038868982  | 0.054848863  | 0.05414616   |
| YPR043W   | 1.933256282  | -0.563057691 | 1.078949953  |
| YPR044C   | -0.108110594 | -0.31997642  | -0.05250738  |
| YPR045C   | -0.043275972 | 0.258246604  | -0.051717369 |
| YPR046W   | 0.066888158  | 0.022426716  | 0.085224431  |
| YPR047W   | -0.087450921 | 0.39155017   | -0.096084652 |
| YPR048W   | 0.002239097  | 0.134814161  | 0.002891813  |
| YPR049C   | 0.003209531  | 0.774436876  | 0.004449276  |
| YPR050C   | -0.001607399 | -0.069621559 | -0.001488317 |
| YPR051W   | 0.627444511  | -0.017100346 | 0.791854212  |
| YPR052C   | 0.152744468  | 1.272327004  | 0.204654471  |

|           |              |              |              |
|-----------|--------------|--------------|--------------|
| YPR053C   | -0.010367545 | 1.932299446  | -0.008077646 |
| YPR054W   | 0.083874619  | -0.055329502 | 0.123258454  |
| YPR055W   | 0.4518999    | 0.129637042  | 0.540584587  |
| YPR056W   | 0.031477312  | 0.118546906  | 0.043027686  |
| YPR057W   | 0.789705634  | 1.615022774  | 0.931597072  |
| YPR058W   | -0.002450067 | 0.323137626  | -0.003088802 |
| YPR059C   | 0.330598363  | 0.047645276  | 0.475324958  |
| YPR060C   | 0.046206726  | 0.956109681  | 0.060466791  |
| YPR061C   | -0.012971618 | 0.240869458  | -0.019294551 |
| YPR062W   | 0.72776967   | 0.043961717  | 0.956628944  |
| YPR063C   | -1.129157832 | -0.008185152 | -1.084934388 |
| YPR064W   | -3.103249393 | 0.056686468  | -2.95794493  |
| YPR065W   | -1.456620639 | -0.137529021 | -1.591147238 |
| YPR066W   | 0.748404462  | 0.762575325  | 1.103747377  |
| YPR067W   | 0.153218251  | 1.073526471  | 0.193327284  |
| YPR068C   | 0.058549013  | 2.301256658  | 0.055911839  |
| YPR069C   | 1.152198793  | 1.584797121  | 1.164874521  |
| YPR070W   | -2.045246861 | 0.367902044  | -2.084836895 |
| YPR071W   | -0.011977067 | 0.343253756  | -0.01147124  |
| YPR072W   | -0.858146344 | -1.129401702 | -0.817781313 |
| YPR073C   | -0.22771046  | 0.009180706  | -0.350259    |
| YPR074C   | -0.000890431 | -0.050190645 | -0.001113421 |
| YPR074W-A |              |              |              |
| YPR075C   | 0.695953049  | 0.014806715  | 1.001396938  |
| YPR076W   | 0.082643054  | 0.754639435  | 0.08144479   |
| YPR077C   | 0.052675614  | 1.679718275  | 0.070800563  |
| YPR078C   | -1.097602573 | -0.093434608 | -1.216499248 |
| YPR079W   | 0.31946237   | 0.38555487   | 0.36523859   |
| YPR080W   |              |              |              |
| YPR081C   |              |              |              |
| YPR082C   | 0.466793181  | 1.660285252  | 0.498570451  |
| YPR083W   | -0.061169326 | -0.003856998 | -0.08817539  |
| YPR084W   | 0.004645232  | 1.008883925  | 0.006045301  |
| YPR085C   | 0.006099284  | 0.149030436  | 0.006295314  |
| YPR086W   | -2.972707078 | 0.205081997  | -2.905974144 |
| YPR087W   | 0.118824643  | 0.160991732  | 0.127924352  |
| YPR088C   | 0.055303474  | 0.378945774  | 0.069704267  |
| YPR089W   | 0.016835422  | -0.025698498 | 0.018902091  |
| YPR090W   | -0.4846311   | -0.011195312 | -0.617435463 |
| YPR091C   | -0.106779059 | -0.071409681 | -0.107079027 |
| YPR092W   | -0.041365215 | 0.864196294  | -0.045856358 |
| YPR093C   | -0.180684014 | -0.1191607   | -0.196262856 |
| YPR094W   | 0.098308565  | -0.29753635  | 0.125443131  |
| YPR095C   | -0.043007048 | 0.177692291  | -0.052956975 |
| YPR096C   | -0.193756427 | 0.28499453   | -0.198405908 |
| YPR097W   | -1.084550398 | 0.450311736  | -1.29994167  |
| YPR098C   | 0.111313459  | 0.136465457  | 0.158077031  |
| YPR099C   | 0.090163518  | 0.947096696  | 0.096542358  |
| YPR100W   | -0.284930865 | -0.027575212 | -0.324747962 |
| YPR101W   | -0.00365021  | -0.232083195 | -0.003013624 |
| YPR102C   |              |              |              |
| YPR103W   | 4.899962777  | 1.393724481  | 4.042944633  |
| YPR104C   | 1.415940063  | 0.063545391  | 1.31527348   |

|           |              |              |              |
|-----------|--------------|--------------|--------------|
| YPR105C   | 1.196275442  | 0.0032294    | 1.145045387  |
| YPR106W   | 0.337858942  | 0.424643604  | 0.236604434  |
| YPR107C   | 0.846476415  | 0.034609997  | 1.060202098  |
| YPR108W   | 5.714597717  | 3.402120522  | 5.89414117   |
| YPR108W-A |              |              |              |
| YPR109W   | 0.001471006  |              | 0.001350138  |
| YPR110C   | 0.103800085  | -0.025168706 | 0.106675923  |
| YPR111W   | 0.168820675  | 0.022346662  | 0.187886721  |
| YPR112C   | 0.038270386  | -0.223513693 | 0.043674285  |
| YPR113W   | 0.082262752  | 1.499825999  | 0.076341012  |
| YPR114W   | 0.026061607  | 0.275849969  | 0.027389958  |
| YPR115W   | 1.7562884    | 0.283965599  | 1.698442629  |
| YPR116W   | 1.340492078  | 0.157047326  | 1.189437699  |
| YPR117W   | 0.688989846  | 0.372105028  | 1.161703241  |
| YPR118W   | -0.038027702 | 0.407163834  | -0.047928678 |
| YPR119W   | 0.176212562  | 0.200323024  | 0.18489437   |
| YPR120C   | 0.029219874  | 0.291309799  | 0.039346957  |
| YPR121W   | 0.322787216  | -1.025310798 | 0.257360146  |
| YPR122W   | 0.26216938   | -0.140586046 | 0.235479677  |
| YPR123C   | 1.065468884  | 0.020992258  | 1.227910927  |
| YPR124W   | 0.357336267  | 0.209871286  | 0.363277693  |
| YPR125W   | -0.115917261 | 0.042829086  | -0.142071555 |
| YPR126C   | -0.079433427 | 0.434591795  | -0.078854767 |
| YPR127W   | 0.095839142  | 0.566004321  | 0.117279354  |
| YPR128C   | 0.273811808  | -0.161193802 | 0.290190222  |
| YPR129W   | 6.71297864   | 1.697164085  | 5.473716802  |
| YPR130C   | 2.009071232  | 1.476929381  | 1.744433679  |
| YPR131C   | 9.389569754  | 2.839471094  | 3.468423327  |
| YPR132W   | 9.834344416  | 2.380056318  | 3.328940825  |
| YPR133C   | -0.640294332 | 3.53290684   | -0.408964936 |
| YPR133W-A | 0.229001953  | 0.20515047   | 0.313356393  |
| YPR134W   | 0.074777835  | -0.861804114 | 0.078466626  |
| YPR135W   | 0.192183888  | -0.048782812 | 0.265594968  |
| YPR136C   | 7.202250909  | 8.239350835  | 2.057484128  |
| YPR137W   | 6.581106837  | 5.742450783  | 1.663766801  |
| YPR138C   | -0.078678211 | -2.192509153 | -0.068642979 |
| YPR139C   | -0.016798596 | 0.148762095  | -0.016147068 |
| YPR140W   | -0.028942917 | 0.152217363  | -0.018587611 |
| YPR141C   | 1.106837697  | 0.547829149  | 0.889338146  |
| YPR142C   | 4.757584057  | 4.342512712  | 2.285102364  |
| YPR143W   | 4.456771634  | 4.826931976  | 2.108585509  |
| YPR144C   | -0.245020552 | 0.019616987  | -0.282124254 |
| YPR145C-A |              |              |              |
| YPR145W   | 0.443676951  | -0.002101652 | 0.575733574  |
| YPR146C   | 0.053406372  | 0.740287822  | 0.063286649  |
| YPR147C   | 0.03109293   | 0.602714687  | 0.043661422  |
| YPR148C   | 0.463731786  | 1.324324935  | 0.482712035  |
| YPR149W   | 0.007733493  | 0.008787796  | 0.007965378  |
| YPR150W   |              | 0.007632358  |              |
| YPR151C   | -0.080644619 | 0.753672052  | -0.141456093 |
| YPR152C   | 0.009159663  | 0.773886254  | 0.01070995   |
| YPR153W   | 0.098450817  | 0.326262296  | 0.13578548   |
| YPR154W   | 1.013296445  | 0.486542553  | 0.975007418  |

|           |              |              |              |
|-----------|--------------|--------------|--------------|
| YPR155C   | 0.212942737  | 0.609876768  | 0.295835192  |
| YPR156C   | 0.963869847  | 0.246170616  | 0.989812681  |
| YPR157W   |              |              |              |
| YPR158W   | 0.052051192  | 0.039363403  | 0.062045347  |
| YPR159C-A |              |              |              |
| YPR159W   | 0.324811279  | 0.443012638  | 0.354520702  |
| YPR160C-A |              |              |              |
| YPR160W   | 0.658582055  | 0.004954877  | 0.906587196  |
| YPR160W-A |              |              |              |
| YPR161C   |              |              |              |
| YPR162C   | -0.046267819 | 0.239030693  | -0.052780271 |
| YPR163C   | 0.02372768   | -3.001513586 | 0.023129823  |
| YPR164W   | -0.067944887 | 0.182783972  | -0.094665715 |
| YPR165W   | 3.25822794   | 0.179885757  | 1.325368194  |
| YPR166C   | 0.28388888   | 1.66568578   | 0.365693753  |
| YPR167C   | 0.015432311  | 1.015720795  | 0.022260676  |
| YPR168W   | 0.633523097  | 0.146455524  | 0.917102252  |
| YPR169W   | 0.403116002  | -0.398629247 | 0.387499302  |
| YPR169W-A |              |              |              |
| YPR170C   | -2.49723165  | -0.200150246 | -2.35337088  |
| YPR170W-A |              |              |              |
| YPR170W-B |              |              |              |
| YPR171W   | 0.5921562    | 0.572363199  | 0.665075627  |
| YPR172W   | 1.376065422  | -0.019576104 | 1.28948442   |
| YPR173C   | 1.737813917  | 0.100406951  | 1.698038901  |
| YPR174C   | 0.064950084  | 0.040151115  | 0.065637719  |
| YPR175W   |              |              |              |
| YPR176C   | 0.080273177  | 0.00632677   | 0.084983556  |
| YPR177C   | 0.041263783  | -1.24822002  | 0.047358671  |
| YPR178W   | 0.017504213  | 0.258580306  | 0.015066104  |
| YPR179C   | -1.233379687 | -0.233581214 | -1.675499137 |
| YPR180W   | -0.049143227 | 1.378010924  | -0.06699147  |
| YPR181C   | -11.7400239  | -15.8541311  | -2.876741931 |
| YPR182W   | 0.206125152  | -0.011016561 | 0.238330467  |
| YPR183W   | 0.075643754  | 0.578378807  | 0.078811095  |
| YPR184W   | 0.027293069  | -0.052435839 | 0.03186098   |
| YPR185W   | 0.175651565  | 0.053357707  | 0.210458438  |
| YPR186C   | 1.191772603  | -0.288065584 | 1.314262889  |
| YPR187W   | 2.834448205  | 0.222528564  | 0.784031233  |
| YPR188C   | 0.058930881  | -0.087254832 | 0.081694323  |
| YPR189W   | 0.326410605  | -0.049724359 | 0.354783913  |
| YPR190C   | 7.711599933  | 4.495745942  | 4.035368574  |
| YPR191W   | 0.988863195  | 0.002171888  | 1.377032169  |
| YPR192W   | 0.102942488  | 0.071951088  | 0.116766988  |
| YPR193C   | 0.047744374  | 0.033033807  | 0.036665587  |
| YPR194C   | 0.309593722  | 0.218425951  | 0.260161687  |
| YPR195C   | 0.066855389  | 0.211954291  | 0.066131599  |
| YPR196W   | 1.430199816  | 0.10468462   | 1.29725389   |
| YPR197C   | 6.399917857  | 2.353705802  | 2.856094451  |
| YPR198W   | 0.178014803  | -0.040186805 | 0.142835822  |
| YPR199C   | 0.188617276  | 0.181718675  | 0.21090617   |
| YPR200C   | 0.21586075   | -0.299910498 | 0.235520929  |
| YPR201W   | 1.777051325  | 1.217574648  | 1.519405724  |

YPR202W  
YPR203W  
YPR204C-A  
YPR204W



z-score for Silvestrol

0.949171764  
-0.506385439  
1.218519449  
0.510410786  
-0.014571917  
0.15969668  
1.921973317  
0.089036018  
-0.038556238  
1.574398684  
-0.966849472  
-0.294676852  
0.380570108  
0.176555064

0.080671962  
0.270439423  
-1.480961018  
0.002731396

1.259519604  
-2.647030927  
0.015034925  
2.028504481  
0.066772317  
0.235252891  
0.429390943

-0.095949659  
-0.087588276  
0.048998824  
1.000662822  
-0.070616418

-0.020525343  
1.962687458  
-1.190901417

1.390672518  
-0.011472692  
-5.51277021  
0.217900671

0.066547107  
-0.003003204  
-1.476332765  
-1.383137647  
0.7976803

-0.825855289  
1.041680746  
-0.614482149  
1.188515904

1.228166569  
0.101123125  
-1.538213216

-2.130677905  
-1.405492871  
0.172495734  
-2.055235689  
0.705675275  
0.182224691

0.730012159  
0.29024512  
-0.017902713

0.600809506  
0.049904363

1.771670861  
0.719086985

-2.090029656

0.563175944  
1.046154804  
0.158882954

1.50107229

0.595847424  
-2.001946072  
0.175693862  
0.029897621  
0.045287128  
1.34936092  
-0.173247057  
-0.953466514  
-0.307651711

-0.842467557  
-0.419798264  
0.186226814  
-0.3146831  
-0.080695739  
-0.15308637  
1.016390244

1.847980452  
0.255626746  
-0.0074572  
-0.450062406  
0.337602171  
0.178219314  
0.855686239  
1.649811193

2.453678195  
0.038094359

0.03478033  
0.247563166  
0.17417777  
0.140989086  
-1.245872252  
-0.031902711  
0.731100687  
-0.10341905  
1.440353432  
0.181901326  
-0.018412302  
1.148148973  
0.131158083  
0.464543393  
-0.331975656  
-3.447479958  
-0.02062916  
-0.735353395  
-0.013357369  
0.094197561  
1.149236908  
0.093600344  
-0.045269782  
0.362423093  
-0.64302954  
0.100873702  
-1.172176204  
0.028991936  
-0.202446442  
-0.025997817  
-0.203287141  
0.431536158  
1.457410545  
1.296414176  
0.563514075  
1.40373463  
-2.365230622  
0.342365129  
-0.041608895  
1.393086867  
-0.155127425  
-0.104238152  
0.887356305

0.77129271  
0.551763395  
-0.062900327  
-0.174147336  
-0.390286555  
-0.062803773  
0.003096245  
0.072027952

1.541904029  
-0.130971182  
0.095326169  
-0.100538301  
0.945523939  
0.004378776  
-4.804416197  
0.084304027  
-4.941691789  
0.987749115

1.526796914  
-0.00699143

0.526692006  
0.223010454  
-0.15430629

-0.049095633  
-1.005132718  
0.031307458  
-0.2580415  
1.125248121  
0.361026484  
1.021286836  
-0.039556784  
0.304761216  
0.287035226  
1.143381082  
1.705778775  
0.102493123  
-0.080741951  
0.035106751  
-1.494513779  
-0.902441827  
0.004734053  
2.718280745  
0.320941255  
0.211098194  
0.012177611  
0.244224747  
0.632331476

-0.762919704  
0.076689283

-2.632239929  
0.059419079  
-0.111339463  
-0.010953735  
1.250537626  
0.265819795  
-0.017504828

-0.057452151  
2.821607787  
-0.191234146  
-0.070651453  
-0.01314918  
0.027050458  
-2.858415433  
-0.306065099  
0.01449407  
-0.011745618  
-0.04894851  
0.952843693  
0.270192559  
0.158699959  
0.006285564  
-1.018887152  
-0.070860126  
-1.817667068  
-1.495326474  
0.003852759  
-0.082942481  
-0.081146999  
0.012607343  
1.063007695  
-0.040113769  
0.006696848  
0.233069254  
0.128108631  
1.460295355  
-0.47006675  
-0.545927898  
0.000945871  
-0.345553214  
-0.100206008  
0.127382549

0.105234731  
0.984655481  
0.251426923  
0.006193472  
0.311557194

-0.083851079  
0.022330427  
-0.303891993  
-0.003616985  
-0.366326008  
0.000729347  
0.826323554  
-0.223435482  
0.140698364  
-1.199062293  
0.897512168  
0.153584778  
0.015116448  
-1.206636052

0.001537292

0.394455305  
-0.043331918

0.041693906  
0.324237921  
-0.734613107  
-0.068409787  
-0.293751632  
0.983773869  
1.293326392  
-0.576597532  
0.011078118  
0.099355963  
-0.423859775  
0.009131878  
0.943039914

0.842126847  
0.062019436  
0.000697825  
-0.261533085

0.026439228  
-1.296131108  
0.151894325  
-20.4016792  
-0.887123911  
-0.103504971  
-0.93186761  
1.206522849

0.063307319  
-0.104635999

0.021226381  
-0.517592343  
-0.001495383  
-0.15270497

0.010499453  
1.914873111  
1.613954426  
0.050038979  
-0.07555809  
0.1126451  
2.070469773  
-0.698622508  
0.008508602  
-0.044883208  
-1.239592904  
-2.418132848  
0.175090779  
-3.244995565  
0.091322791

0.758830563  
0.065672675

0.112727682  
1.378854983  
-0.102809585  
0.402424995

0.282584844  
-1.054420057

0.123531523  
-0.027592764  
0.086356722  
1.256570689  
-0.305544076  
0.001157445  
-0.630712396  
-1.545726696  
-0.859451325  
-0.061931606

1.595991685  
0.903475235  
1.616787109  
-4.620814875



-1.901371204  
-0.0107217  
-0.01615451  
-1.471512799

0.047569076  
0.030323915  
1.900545533  
0.062863385  
1.202798366  
0.368338059  
1.099909943  
-0.064109971  
-0.6328512  
3.144222  
0.219675576

0.511729884  
0.699827225  
0.003839827  
0.484978726  
-0.323815565  
-1.29409302  
-0.499003656  
0.024202946  
-1.456641511  
-0.20154251  
-0.001497237  
-0.245518264  
0.713072739  
0.225707835  
-2.736099944  
-1.425037335  
-0.024325697  
-1.23224986  
-1.652453637

0.346928967  
-1.637132751  
-0.927690129  
0.172368352  
0.784119315  
-0.208888115  
-0.107712922  
0.001611947  
0.356773364  
0.03838375  
-1.181454336  
0.103204425  
0.006786137  
0.879968688  
-0.431524104  
0.481244368

0.122004998  
-1.130478732  
0.53814334  
0.056092691  
-0.073881283  
0.238222143  
0.365168274

-0.937179807  
-0.038721933  
0.171318088  
-0.349159892  
0.901399986  
0.000175241  
1.036671004  
2.099398243  
2.326648934

-0.007312389  
-0.304425182  
-0.710061648  
-0.742307374  
-0.020090972

1.103572419  
-1.519050065  
-0.635465338  
-0.019220782

-0.153026057  
1.476855536  
0.197958405  
-0.015917855  
-0.147510008  
-0.005233326  
0.795110483  
0.221047111  
-0.009781031  
-0.762659148  
-0.179294913  
0.619782568  
-0.651621608  
-0.025210141  
-0.462528924  
0.056500895  
0.556640217  
-0.361990524  
-0.259297595  
0.665696321  
0.02052066

0.06868486  
0.799507528

-2.299063605  
-1.542803707  
-0.010416812  
-0.151311652  
-0.020325408  
-0.109156955  
-0.260392569

-0.761874849  
-0.023085788  
0.053396105

-0.018293837  
0.02159541  
-1.160962584  
-0.280049251  
-0.061006722  
-0.107782896  
-1.233305201  
-0.081059218  
0.010670524  
0.010841832  
1.542961733  
-2.28573893  
-2.599663393  
1.678229431  
-0.178209043  
0.377695746  
0.151998357  
0.176875317  
-0.020118879  
0.032259183  
0.175295337

-0.017912294  
0.455608926  
1.944815248  
-0.856492246  
0.001590983  
-0.451086643  
0.005772078  
1.208136433  
-0.021252017  
-2.334445894  
-0.438886592  
0.710213039  
1.880236007  
1.694508817  
-1.301258615  
-0.594451657

-3.549010692  
-0.075538492  
0.126671748

-0.026980953  
-0.046709947  
-2.570520061  
-3.36052213  
-5.425148433  
-1.697801416  
-4.39686716  
-3.355140884  
-1.988302727  
-2.904313464  
-2.353635508  
-3.670648478  
0.02983136  
-0.068164633  
-1.201599773  
-6.47071192  
-4.099050469  
-3.623752962  
-3.885231569  
0.341892376  
-4.3439003  
-3.075801968

-3.764417242  
-3.656469148

-0.201792084  
-2.723423985  
0.004997091

1.960948528  
-3.673972718

-0.116793279  
0.128500597  
-0.601343749  
-0.36142944

-1.64019384  
-4.477767309  
-2.083356115  
0.284009776  
0.157914432  
-1.654670411

0.003093605  
0.035937672  
1.519458602  
-0.071423309

1.024479807

0.720844609

0.176833297

1.225663777

0.218421473

-0.025128269

-0.09418041

0.801731979

2.291862815

0.244216677

1.943752755

1.824845181

1.156554429

2.192619278

0.012722158

0.091664527

0.061496835

0.056866448

-0.04634507

-1.795004322

0.315139958

0.08213848

1.419006424

2.050193709

0.334022242

1.96378093

0.010297701

2.285066195

1.303004766

-0.182210289

1.027110762

0.438931607

-0.027324379

1.130513195

0.849548406

2.020305713

0.791609273

0.007579974

0.033701511

0.289828705

1.526601048

0.809755431

0.514291224

0.428540144

0.709976964

-0.017910954  
0.506991803  
0.972337585  
0.126385289  
0.542365991  
0.052690628  
0.971940563  
1.417796946  
1.586014057  
1.136544549  
0.052357353  
0.537358215  
1.119581063  
0.893503611  
0.841996371  
-0.200736099  
0.390075905  
-0.034777156  
1.307210318  
0.105515133

2.578780999  
1.283195517  
0.923866887  
-3.460395542  
0.333454533  
2.306367646  
2.397489953  
-3.695398109  
-2.785398939

-2.444623611  
-2.859363729  
-3.979549694  
-3.391703849  
-0.354990884  
0.04834147  
-4.984087019  
-0.275848178  
0.265700454  
-3.887436474  
0.309599453  
-5.698860761  
-3.104267236

-3.262412492  
-3.295295256  
-2.802223649

0.144661695  
-0.091734469

-0.206424735  
-4.909922754  
-3.57484183  
-5.402348678  
-2.071338926  
0.027361999  
0.086699793  
0.0969531  
-4.467082942  
-1.911497052

0.836100301  
-3.823599448  
-0.07568855  
-1.898741591  
-3.292606725  
-0.04101419  
-3.107046584  
0.050595111  
-3.376101463  
-0.275178894  
-2.650589244  
-2.88659653  
0.040531844

-3.333463608  
-3.716644183  
-3.642011394

-4.061632553  
-3.552595909  
0.001373766  
-0.039592959  
-4.13277965  
-3.6605111  
-4.133066482  
-2.705707831  
-1.737508238  
0.096845628  
0.01097198  
0.738661917  
0.063843499  
-1.902079319  
-0.019950132

0.250512893

0.83043438  
-0.156277021  
0.084805431  
-0.005591727  
0.008802031  
0.487477037

0.675738121  
0.729305728  
-0.071792374

-0.015882348  
0.148605869  
-0.001042363  
-0.456599345  
-0.231584138  
-0.17752854

3.574413162  
-0.456576453  
0.037128579  
-0.419022348  
-0.466200434  
-0.156437523  
1.267166612  
1.778245171  
0.230063376  
0.000599392  
-1.411264069  
0.051392727  
-0.101147639  
-0.582708222  
-0.004635119

0.463225228  
-1.537858868  
0.014326265  
0.033634209

0.022931508  
1.46799736  
-0.381134784  
0.007374819  
0.34597132  
1.111161199  
0.051328329  
2.792180603



-0.469179009

0.003935333

-0.12746165

0.04907002

1.355678508

0.14069151

0.034588409

1.818226807

0.188744368

0.263179546

0.263318484

-0.105016026

-0.108609546

-1.406243912

0.06136993

0.132130652

0.009787933

0.267259402

-0.150263341

0.061212316

0.238930851

-0.10417116

0.003684209

-0.024969996

-0.116627774

1.515401796

0.968369974

-0.197172741

0.170693555

-0.20525187

-0.1525545

0.003706447

0.667957417

-0.004080682

-1.575579775

-0.007569255

-0.926489064

-0.137201806

2.06437326

-1.288175442

0.003325636

0.169851729

0.040386963

0.012161653

0.100279371

0.080183249

-0.094551473

0.439186702

-0.051638828

-0.163081549

0.11288658  
0.570896508  
-0.040408298  
0.73081842  
-0.003194546  
-0.00328743  
1.328902141  
-0.032866247  
-0.294904175  
1.632248702  
-0.024542606  
2.961130774  
-0.017851047  
0.204584677  
0.036363811  
0.192982991  
-0.246383636  
0.540776468  
1.202928816  
0.052489966  
-0.109861623  
0.045332793  
0.058791894  
-0.003345282  
0.092389484  
2.60110515  
-0.11176607  
0.275942709  
0.468968102

0.356373867  
0.185973433  
0.009267358  
0.109479475  
0.200124383  
0.667153091  
0.225236458  
0.028679397  
0.003200119  
-0.003534459  
-0.009202802  
-0.069789745  
-0.362138478  
0.007777911  
1.803341652  
0.025183526  
0.014037437  
0.052269535  
-0.969670146  
-0.048116791  
-1.186697977  
-0.280097565

0.043945394  
-0.202640316  
0.362503354  
-0.15878676  
-0.167583326  
0.186641912  
-0.054942209  
-0.642995622  
-0.117510664  
-0.312997983  
1.28163843  
-2.093329877  
-0.042275491  
2.226552737  
0.748271118  
-0.018076422  
2.726578545  
1.303459413  
2.289725352  
1.045186578  
-0.131163412  
-1.826074864  
0.932056551  
0.269287919  
0.025293149  
  
-1.879897574  
  
0.825052613  
  
-1.954684183  
0.047785484  
-0.021205331  
-0.019186045  
-1.61271165  
0.100385366  
-0.020458254  
0.960282756  
-0.332210212  
0.516082607  
0.019865227  
0.008722026  
-0.035832619  
-1.913943364  
-0.27824994  
0.145061213  
-0.82176416  
0.0394721  
1.421027196  
-0.472523207  
0.326383755  
0.181543871  
-0.044526213

-0.401180885

-6.008077417

-1.302939317

0.026327727

-0.076863527

-0.030973969

-0.094918782

1.704823569

-5.036229717

-0.675334539

2.635147782

2.292537607

1.11018654

0.04321653

-0.072080121

-0.023198532

-0.238554439

-0.055402848

0.876628955

-2.105021601

-0.18413323

-0.297512464

0.238244457

0.045096276

-1.657763596

0.02821083

0.005856183

0.004731971

0.039864345

-0.017182446

-2.703998323

0.048866266

0.392519656

0.015229696

-1.469483307

-0.052431316

0.01227381

-0.007849951

0.080441544

0.045633915

-0.016686148

1.870423023

0.021582349

1.893138176

1.674006157

-0.019147046

0.002698258

-0.102096823

0.098776533

-0.025716227

-0.06817058  
-0.584183219  
-0.011192269  
0.005760129

-0.605975461  
0.018292235  
0.257294388  
0.212715452

-0.016637838  
1.121796567  
-0.076116341

0.02843706  
0.060048521  
0.020179012  
-0.095488728  
-0.032351351  
-0.041648645  
0.866535424  
0.181883853

-0.540134894  
0.008157246

-0.040187798  
0.243073379  
-0.029443626  
0.170162943  
-0.155675041  
-0.745293972  
0.084464135  
0.03756425  
-1.353438207  
0.452956772  
0.686401188  
-0.030221945

-0.390093344  
0.14786009  
-0.387242015  
0.00756728  
0.011042002

-0.00458367

0.423913815  
0.032722902  
-0.031423671

0.365017896  
0.072070269  
-0.016361229  
0.635826933  
-15.7227527  
0.02458746  
-0.617130983  
-0.155843275  
-0.198894166  
0.600296884  
0.116470301  
-6.244461167  
-1.15933584  
-0.101968368  
-0.019025023  
-1.239972054  
-0.103858819  
-0.038703562  
0.072128972  
1.713716229  
0.000585957  
0.420235035  
0.061549567  
2.022907187  
0.360881038

-0.015980935  
-0.026092374  
0.869543541  
-0.008917076  
-1.265775639  
4.143156176  
-0.604745502  
-1.008902787  
-0.791210001  
0.199182451  
-1.203470225  
-0.002773278

0.081671313  
-0.932576772  
0.99910366  
-0.153124578  
-1.69942341  
0.03941967  
-0.024975346  
0.818620964

0.379349343  
0.364350559  
0.374553101

0.047943508

2.13749867  
-0.625480065  
2.423676031  
1.525639001  
0.817164304  
0.863764315  
0.068637003  
-1.237887596  
1.234646586  
0.12750864  
0.348699752  
0.015034145  
-1.400827256

-0.048495506  
0.808634705  
0.070060813  
0.696666052  
-0.006032322  
0.256135761  
-0.596944917  
0.023983668  
2.67761829  
-0.208572304  
-0.055834054  
-0.243437604

-0.032552116

-0.024756551  
0.060987444  
-0.155326449  
0.295807995  
0.057459137  
0.015434052  
-0.057614891  
-0.21038646  
0.056151826  
-0.062745042  
-0.174181324  
-0.159177509  
0.015479751  
0.083373005  
-0.246297048  
-0.030485089  
0.141067545  
0.004648255

-0.00904713  
0.015557508  
0.916348445  
-0.014381744  
0.287873363  
-1.162327499  
0.050313528  
0.104160928  
0.521782159

1.743866678  
-0.038837736  
0.057003402  
0.043029196  
0.1266685  
-0.694049556  
-0.127143544  
-0.039196341  
-0.033029031  
-1.116640565  
-0.085604083  
-0.172805294  
1.01106603  
0.811168373  
-1.219217865  
-0.004880021  
-0.076367279  
-0.755575756  
0.149968761  
0.163568332  
-1.194670174  
-0.080921649

0.262505056  
-0.376183054  
0.446633329  
0.199988726  
-0.275196326  
0.119335522  
-0.138076234  
-0.829367022  
-0.293440823  
0.023088639  
-0.002979341  
-0.764424982  
-0.22051329  
-0.863864142

-0.011900749  
1.878011803  
-0.097473153  
0.032720888



-0.116901279  
-0.117318447  
1.781922861  
-0.580698038  
-0.053017543  
-0.075349782  
-0.644183339  
-0.421689494  
  
-1.129491604  
-1.529021643  
-0.249325029  
0.326818505  
0.10961811  
0.00992492  
-1.452359229  
-0.268435944  
-0.089898375  
0.128126248  
0.512187039  
0.112871114  
1.864359925  
0.11786581  
-1.940340218  
-0.19576182  
-0.945945914  
-0.032496727  
-0.094841849  
1.529333305  
0.079285012  
-0.084769594  
-0.680467465  
0.357728738  
-1.086554156  
0.091122233  
-0.222516832  
0.089102233  
-0.023736746  
0.961510791  
0.766500612  
2.156884649  
-0.546068913  
-0.792128772  
-0.030935968  
0.675272286  
0.066430914  
-1.356296873  
-0.028237296  
0.258066618  
1.855693446  
-0.005485959  
-0.435385119  
-1.689899424

0.117922487  
0.74975536  
-0.772657485  
0.269899019  
0.006284859  
-1.322061368  
0.06972756  
0.32010793

0.099027758  
-0.369926898  
-0.790447627  
0.557588608  
0.024934091  
0.016217941  
1.187077237  
-0.017267287  
-1.275150165  
-0.017227778  
1.004340502  
0.268477264  
-0.00209529  
-1.717266051  
0.123070664  
0.037853123  
-0.211578399  
-0.418800551  
-0.027007859  
0.396563815  
0.026511984  
-1.441441868  
-1.120451321  
-0.06449738  
-1.152141977  
0.36308437  
-0.11565564  
0.144958218  
-1.857776951  
0.041326039  
-0.433779175  
0.047721042  
0.090085994  
2.473580047  
-0.002588227  
0.646668493  
-1.408059338  
-0.161967772  
-0.266682882  
0.164390487  
0.257537868  
0.239293089  
0.017576298  
-1.524850312

0.021796933  
-1.644462519  
0.276792687  
0.008127752  
-0.405577979  
0.23007473  
-1.352731709  
1.547268188  
-0.007136875  
-0.018169365  
0.311020517  
0.412185539  
0.943242814  
-0.13419981  
0.206516118  
-0.008266184  
0.059289695  
0.27497278  
-0.014862157  
-0.507623404  
1.566529637  
1.274258281  
-0.902010824  
0.041394532  
  
-0.385243227  
0.020499586  
0.145014166  
0.465222402  
0.546878968  
  
-0.167520809  
  
-4.978680562  
-0.17378335  
0.512805339  
-0.168950068  
-0.018456305  
-0.071595239  
0.179153923  
0.942016824  
0.113992161  
2.428207876  
-0.308960682  
0.807901144  
-0.833373026  
-0.750943105  
-0.028829418  
-0.025912486  
0.041905098  
-0.302292892  
0.197109707

2.283989902

-0.821408012

-2.211062556

0.20957365

-1.774611001

1.334778897

0.05486852

-0.168035777

0.596523938

-0.118511858

-0.086149778

-0.171671959

-0.046272729

0.000185902

-0.023055109

-0.021233187

-0.017177872

-1.288451926

-0.071786272

0.060130624

-0.009747288

0.150284559

-0.003623185

0.07742292

0.808036167

-0.177062323

-0.176735341

0.843334334

1.514562475

0.094230394

-0.213769921

-0.050302354

0.500109883

0.043298227

0.764518961

-1.195966722

-0.086341347

0.114968375

-0.793384832

0.020932221

-0.392311509

-0.054899753

0.004723117

0.266303437

0.039950472

0.0542433  
0.153599654  
0.003302399  
-0.41859304  
1.6971603  
-0.076840326  
1.828015979  
0.135862511  
0.008000201  
-1.274002857  
0.103895906  
-0.200900866  
-0.591233481  
0.043377182  
0.007385257  
-0.191232483  
2.064091467  
0.127242133  
-1.024344068  
  
0.746113437  
0.63806669  
-0.091797868  
-0.135610943  
0.301756501  
-0.322789889  
-2.197357207  
0.538901291  
0.03920924  
-0.203537776  
0.133331044  
  
-0.506808355  
-0.091061467  
1.190579647  
-0.037817733  
-0.282848783  
-0.255345525  
0.168044583  
0.188009713  
2.877585198  
-0.250000505  
-8.318852126  
-0.251167497  
-0.021634551  
-0.005104292  
  
-1.254556763  
0.415607227  
-0.921322869  
0.639459743  
-0.011215601  
0.013539127

-0.145167789  
-1.262489867  
-0.364742605  
-0.069451401  
0.303935373  
-0.216895684  
0.923290063  
0.150807114

0.171565467  
1.484240266  
0.369837944  
-0.086463501  
0.461282905  
-0.14674623  
0.010995243  
-0.0089466  
0.022223428  
1.830610062  
-0.00920518  
-0.086359691

-0.55182117  
-1.389095176  
0.662713894

0.097744045  
-0.078883403  
0.313384075  
-0.507745111  
0.449632357  
1.173207957  
-0.893599365  
0.082247986  
-0.049884858  
-0.301643259  
-0.337250159  
-0.256051111  
0.205423906  
-0.022472271  
0.003303973  
-0.031071551  
0.018042464  
-0.632201863  
-1.391268808  
0.034073552  
0.32836144  
-0.092889336  
-1.016690435  
-0.044265765  
0.10368785  
0.745094917  
0.164452736

-0.314409662  
-1.852687557  
0.157781641  
0.039668033  
-1.029630183  
0.517477293  
1.894638489  
-0.025364338  
-1.622171607  
0.000392037  
-0.706929708  
-1.848091132  
0.298809219  
-0.094316703  
1.054864327  
-0.026152272

-2.093934809  
-0.96966113

-0.163872175  
0.169163621  
-0.154663546  
-0.476720031  
-0.413730132  
-0.053272082  
0.013429722  
-0.016114204

-0.005907635  
0.160514844  
-0.627963394  
0.423901306  
0.489466378  
-1.973162241

-0.311823693  
0.007314663  
0.159154774  
-0.05406065  
-1.152549524  
-0.538017063  
-1.054888799  
0.02537107  
-0.00566671  
0.080493287  
-0.605345812  
0.367014773  
-1.027338076  
-0.319851373  
-1.291915495

0.056560724  
0.001417414  
-0.08775123

0.372903233  
0.18797977  
-0.076809594  
0.894741154  
0.213181572  
-0.115442616  
-0.249363804

1.643925607  
0.49263868

0.157228237  
-0.022966269  
-0.066862525  
-0.274999571  
0.294612114  
0.42142368  
0.364167066  
2.210097232  
2.380645624

0.164494074  
1.463245602  
1.289862083

-0.10132082  
0.645406002  
-1.048848026  
1.604584793  
-1.303994377  
0.379577622  
0.09095604

0.234922681  
0.029843926

0.755124339  
2.342296754

1.563012649  
3.021295859  
1.812337312



1.162186004  
0.223532965  
0.024078994  
0.045728245

-0.692199686  
0.255896827  
0.12490247  
0.185352049  
1.79120203  
0.398210381  
0.169478517  
0.167871274  
1.395733314

-0.319705918  
-1.010383488  
-0.113690441

1.033022309  
-0.012466396  
-0.039822656  
0.022426267  
-0.054463991

-1.238004536  
0.15539186  
0.398303336  
0.455806762  
1.141727485  
0.171736664  
0.997859532  
0.388658641  
-0.478072877  
-0.776424084

-0.055180345  
-0.130334487

0.252736297  
0.781786641  
0.203180712  
1.416658345  
0.031685965

0.497205013  
-0.009468788  
-0.005288461  
0.158323912  
0.458203147  
1.407329414  
1.212435424  
0.913253121  
-0.120074538  
-0.005453395  
0.182754253

-1.211836487  
-0.029486574  
-0.028861787  
-2.210995817  
-0.740138057  
2.897694036  
0.044936673

0.017340583  
0.827726487  
-14.1329315

-0.764507976  
-1.042955024

0.313100815  
3.039511595  
-0.086290072  
0.579569631  
1.301120667  
-1.099413314  
-0.624123808  
-2.311030241  
1.225275373  
-0.000903836  
-0.296696323  
0.897922597  
-0.120731135  
-0.047811497  
-0.06097319  
0.013584821  
-1.264994646  
-1.319519723  
-2.697016371  
-1.404856514  
-0.279055494  
0.02029711  
-0.515750299  
0.035774571  
0.06798736

-0.248159596  
-0.467769511  
-0.318174637  
-0.044567132

0.344002792  
-0.614306236  
-2.122733888  
2.331810986  
-0.260736989  
0.02695882  
0.575095009  
0.040063869  
0.229152821  
-0.159114934  
-1.680049916  
-0.114774106  
-2.208881036  
-0.50237812  
0.079163559  
0.175070348  
0.170030621  
0.143880531  
0.002754167  
-0.240991719  
2.612700877  
0.796800484  
0.045095199  
-0.563292779  
0.16089738  
0.227655708

-0.108180988

-0.709490561  
-0.170292185

-0.068061833  
-0.450339882  
-0.010798193  
-1.173345827  
-1.45446551  
0.003474146

0.42823548  
0.385368324  
-1.887529202

-0.232669253  
0.025883652

0.004421844  
-0.078030477  
-0.008555554  
-0.008729563  
-1.238824663  
0.24745897  
-0.00929551  
1.752638586  
2.337204243  
1.030515117  
0.528628511  
-2.250576229  
  
-0.088079898  
  
0.085233567  
-1.07126094  
  
0.08439958  
-0.150934638  
  
-0.592328569  
-0.005244225  
-1.721031652  
-0.022905681  
-1.294199327  
-0.550239974  
-0.035639191  
-0.274277311  
-0.899577105  
2.559066958  
-4.884234347  
0.544619327  
-1.728465941  
-0.751170416  
0.217753051  
-0.047578269  
-0.009702615  
-0.032005639  
-0.873139612  
0.292774614  
0.724473899  
-0.135002603  
0.368841989  
-0.064125689  
0.137029841  
-0.200180457  
-3.291161136  
  
-0.399153187

0.054639506  
0.013687833  
0.001326337

0.034286622  
0.006905603  
-0.00156424  
-0.090425171  
0.427060786  
0.007390855  
0.759128615

-0.152218208  
0.032941994

-5.493929067

-0.704110404  
-0.836371498  
-1.644084204  
0.168785734

-1.172529833  
-0.539631663  
0.167642825  
-0.004920554  
-0.958968152  
0.894515367

0.64645655  
-0.199515077

0.326182611  
-0.695275155

2.410146968  
-3.920557953  
0.024194805  
0.065594661  
1.72846867  
0.103542548  
0.90191358  
0.164909831

0.034957461  
0.523300708  
-0.225866991

-1.041545341  
-1.332578449  
0.004261972  
1.219694824

0.336195902

1.300766666

1.038724437

1.103708574

-0.395241428

0.037658443

0.084167687

-0.654163539

-1.310978484

0.507414664

0.029088544

0.04569478

0.138525376

-0.029982316

0.004924629

0.233242392

-1.669201021

-2.142470769

-1.245609425

0.486039231

-0.865001461

-1.373015349

-0.054866068

0.138050799

0.585439895

0.090569672

-0.847068736

0.170797805

0.979000639

0.16558402

0.26332738

-1.283918686

0.269237183

-0.089591864

-0.026779624

0.055457899

-0.357498147

-0.023275386

0.021942563

1.095563035

0.245502834  
-0.011054078  
-0.075008757  
1.482472318

-0.062433667  
0.073424394  
0.110520909  
0.029881732  
1.166588112  
-1.11374121  
-0.003665289  
-0.522624836  
0.060206609  
0.599918666

0.68659116  
0.560129258  
-0.012408067  
-0.017902537  
0.16020008  
-0.074559358  
0.05040178  
0.084993276  
-0.030029587  
-0.286527031  
0.011135049  
-0.100169866  
0.17466224  
-0.74843222  
0.03729162

0.042570005

-0.678828584

0.339696689  
2.781146307  
1.44101055  
0.718245473  
-0.396136668  
-0.014654211  
-0.169374029  
0.155872033  
0.139028681

1.972679038

0.051524699

0.592941668

-0.002949356

-0.615286714

1.403664058

0.056808523

-1.139344561

0.130314733

1.998909179

0.323833847

-0.084546032

-0.07934112

-0.097599227

-0.532781655

-0.079264992

0.010075531

1.702620964

-0.069609614

-0.008532261

-0.835968251

1.770460513

0.330076225

0.286641692

0.201222966

0.008997695

0.03761116

0.009732998

0.435038978

0.002085449

0.59603182

0.859028486

1.816548721

0.042010502

1.726158333

-0.808306941

0.068416572

-0.218428633

0.249862041

-0.105893647

1.068699945

0.013264638

0.162532182

-0.191629985

1.697183492

0.708445068



-0.104096191  
0.027685076  
0.710049873  
0.412938293  
-0.021705782  
0.26420257  
-0.169438816  
0.634727675  
1.974335726

1.179302721  
0.491153206  
2.112076007  
-0.084885657  
0.971241126  
1.259582805  
-2.793498895

0.583906808  
0.690009546  
0.422823557  
0.205648499  
0.0053467  
0.006974493  
0.132584807  
1.134209925  
0.431510849  
0.091124646  
-0.856949902  
-0.053434621  
0.045167906  
0.224051473  
0.650218282  
-0.110185977

-1.485869721

2.122959883  
-1.340371631  
-1.381456251  
0.229248189  
0.047753884  
0.393809631  
-0.957507331  
-0.402032778  
0.091867686

0.096712592  
-1.330555398

0.019235858  
-0.230191293  
-0.079530235  
2.60753023  
1.87601534  
0.971076589  
0.120867838

0.134735192  
0.512413745  
0.156989015  
0.00327447  
-0.290953546  
-0.049391158  
-0.013437022  
0.123804404  
0.515028733  
-0.037510583

0.107830633  
0.393887494  
-0.033539525  
-0.995876279  
-0.232574534  
-0.007480045  
0.037603935  
0.647950509  
1.728487866  
0.004244227  
-0.015351848  
-0.171251152  
0.004961352  
0.704965224  
0.957750157  
0.066556729  
-0.603239084  
-1.113971835  
-0.021588859  
-0.704149727  
-0.013316447  
-0.162410893  
0.008126227  
-0.885544249  
-0.024404938  
1.235305591  
-0.047421787  
-1.098665815  
0.989301145  
-0.751575824  
2.543283098  
-0.048494132  
-1.430653623  
-1.245938617

-0.107645232  
1.18919772  
1.24473672

1.209689767  
0.404593288

0.088194724

-0.054028128  
-0.091724491  
0.116065687  
-0.025004023  
-0.183863284  
-0.096323534  
-0.480414452  
1.038787964  
-0.022661194  
-2.85994859  
-0.053810643  
-0.005851928

0.01194399  
0.634241858  
-0.033679746

1.681854547  
-0.115553957  
0.241950421  
-0.38158784  
-0.194529553  
-0.069926921

0.010720178  
0.887443083  
-0.029328161  
-0.834356534

-1.026555521  
-0.100026639  
-0.050930435  
0.379397199  
-0.058407814  
-1.277840281  
0.022474664  
-0.022311134  
-2.287157772  
0.038865761  
0.034197939  
0.757989926  
-0.112113128  
0.137624025

0.147321399  
-1.348863538  
0.004450566  
0.087425795  
0.023747459  
-0.037530939  
0.033651283  
-0.671770688  
-0.011103015  
0.681602477  
-0.115923713  
-1.866594997  
0.244599403  
-0.007992013  
-0.042351999  
-0.220332845

-0.000882605  
-0.998151401  
-1.246058581  
0.128102703  
0.237462062  
-0.012695487  
2.119410415  
-0.032032259  
-0.152444287  
-1.195908603  
-0.186679924  
-0.018770587

0.007945608  
0.01931933  
0.001145094

0.57119507

0.199111661  
-0.060883217  
-1.599919209  
-1.159376792  
-1.063655332

-0.018417174  
-0.105280638  
  
0.655271513  
  
0.515479749  
-2.974759324  
-0.008640552  
-0.014870583  
-0.306989693  
0.224882527  
-0.014276708  
-0.867183186  
0.299291087  
-0.68605534  
0.730634752  
-0.327781006  
0.057056682  
0.066003791  
-1.51E-05  
0.002104389  
0.190661574  
0.507455308  
-0.083158659  
  
0.071540909  
0.28217553  
1.0414141  
0.570693241  
-1.27571589  
0.296549363  
-0.661417513  
1.237817265  
0.113771668  
-0.030683339  
  
-1.376494039  
0.292052328  
-0.004932482  
-0.218764299  
-0.062659743  
1.10278458  
0.10620436  
0.952008215  
-0.781752335  
0.011142593  
-0.124718835  
-0.014280316  
0.088978579  
0.00066953  
0.79037143  
1.343796731  
-0.064555326

-0.025581904  
-0.864486037  
0.147140822  
0.155419373  
0.065617608  
0.213627468  
0.196793587

0.110714821  
1.614148307  
0.041721561  
0.67475472  
0.607000002  
-0.080918778  
0.620891267  
1.288063329  
1.061071453  
-0.021022382  
0.823409901  
0.865248945  
0.000518948  
1.549092212  
0.025511484  
-0.01760442  
0.726177717  
0.961006463  
0.023741291  
0.018308931  
0.308248331  
0.005723358  
0.908708235  
0.065146485  
-0.553747678  
0.273659527  
-0.206186986  
0.299218306  
-0.116878995  
-0.004309249  
0.117929973  
1.269858546  
0.013050745  
-0.016757497  
0.436500376

0.059867371  
-0.019213483  
-0.372522775  
3.141672645  
0.227990281

0.86582799  
0.528498807  
0.008586834

-0.003320794  
-0.027210318  
0.991743397  
-0.040544472  
1.209599538  
0.019726975  
-0.003420571  
-0.105045803  
0.073544359  
0.07536301  
0.029538147  
2.533759946  
-0.029387454  
-0.032303502  
-0.993317617  
-2.246750361  
-0.312482386  
0.404786515  
-0.736221557  
0.793573855  
0.084117939  
-0.007737355  
-0.329132729

0.665567143  
1.976348774  
-0.333069053  
1.396214632  
-2.394151421  
1.783432267

-1.506156977  
0.893494987  
-0.215022817  
-1.062938219  
-0.708193521  
-0.802510315  
-1.596555053  
-0.002518109  
0.007116139  
0.033465205  
0.018336658  
-0.028635845  
1.234392654  
-0.120631341  
-2.302001805  
0.045287011  
-0.94673689  
-0.307067881  
-0.325089026  
-0.560989303  
-1.176794921  
0.116216289

-0.059022072  
-0.260283313  
0.1213509  
0.062934332  
2.787829017  
0.157460668  
0.328078663  
1.204171076  
0.073356571  
0.090751063  
0.562574872  
-0.078109399  
-0.007510033  
-0.027646052  
-0.515446276  
-14.0910055  
-0.021285256  
-0.061501893  
-0.047192976  
  
-0.390889828  
1.095220754  
-0.137596606  
-2.403507721  
-2.393522495  
-2.602530815  
-0.078388249  
0.314365205  
1.31763955  
0.002442662  
0.110004067  
  
-1.806795173  
1.329425339  
-0.954507728  
-0.317659862  
-0.056771115  
0.104127033  
-1.239130194  
-2.1194711  
-3.286285046  
0.058138431  
-0.022558585  
1.46151681  
-0.095847823  
-1.933742343  
1.383359169  
-1.904811564  
0.977694706  
1.452476638  
0.11452988  
-0.09256364  
0.724675175



1.795985495  
-0.119066365  
0.044674529  
-0.070203099  
-0.355682388

0.080441537  
-3.986568283  
-0.020687355  
-0.1703426  
0.185783007  
-0.523328041  
-0.717611326  
-1.681400258  
-0.73787185  
-2.329439403  
-1.132879872  
2.642050057  
0.478541284  
1.218663862  
0.109230898

2.736032618  
-0.471479416  
1.387969027  
-0.120975286  
-0.355735116  
-0.332517485  
0.051580224  
0.101324909

-0.14406767  
-0.002869496  
0.565386988  
0.011880333  
-0.100780023

-0.220493277  
1.261759842  
0.407393085  
-1.281188033  
-1.195591032  
0.250458018  
0.080295972  
0.087975835  
1.240144603  
-0.247431003  
-0.050278668  
-0.989566757  
0.014183422  
0.647273703  
0.059018804  
0.036674151

-0.401670804  
0.332510179  
-0.207483293  
-0.000576142  
1.525337331  
0.14624027  
-0.001135316  
-0.241725825  
-0.004836889  
1.252983288  
1.03495161  
-2.00389876  
0.001128071

0.004147162  
-0.042103419  
0.070079213  
-0.162220363  
0.301411239  
-4.564845238  
-0.156315886  
-0.019446279  
0.032004811  
-0.050126269  
1.894531064  
1.567153065  
-0.043724071

-0.176567739  
-0.102261693  
-0.228255764  
0.751097732  
0.065355004  
0.704560022  
0.003796859  
1.271527668  
0.102431968  
0.044856545  
-1.007395238  
-1.72532759

-0.191929069  
0.040316474  
-0.206847297  
-0.685226493  
-0.20769001  
1.589699188  
0.039110313  
-0.609689467  
-0.017694498  
0.033408877

-2.424326714

-0.201192409  
-0.011318733  
  
0.033688789  
0.082261177  
-0.008054521  
  
-0.100285157  
-0.001875025  
-0.020221164  
-0.645796305  
0.678992988  
0.299609364  
3.48233877  
-0.275040504  
0.04336198  
-1.162412061  
0.784540526  
0.206375955  
-2.276081726  
0.016403882  
0.205448429  
-0.383869858  
-0.244865197  
0.147306169  
-0.206620221  
0.222753413  
-0.022537393  
  
-0.789479489  
  
-0.040321969  
-1.737818606  
0.009302711  
-4.79565297  
1.282016926  
0.46746888  
-0.023409422  
0.188190085  
1.049940777  
1.439609358  
-5.009697918  
0.921440368  
-0.063005409  
0.058118919  
-0.016180961  
0.409571287  
-1.173113306  
-0.350694419  
-3.6350928  
-1.389244232  
0.147182144  
-0.127576804

1.543484466

-1.60002356  
-0.826980884

-0.06867795  
0.032904202

0.767866245  
0.071191768  
-0.083461541  
-0.154879101  
-0.693717396  
1.153945864  
0.655823212  
-3.793324611  
0.093650193

0.131717113  
-0.009431404

-0.667975077

1.750980749  
-0.633759043  
2.093726348  
-0.565608984  
0.009687959  
-0.810400754  
-0.080961406  
-0.805311617  
0.042432539  
-1.275871536  
-0.084734632

0.000548452  
-0.007657515  
0.574190317  
-4.224010927

-0.355270841  
-0.016522879  
0.234302627  
0.169171999  
-0.179041566  
-0.026827977  
-0.068688793

-3.50639752  
-0.045622378  
-0.156239682  
1.460066706  
2.099033919

0.015129664

-1.539288514

-0.000276412  
0.595476703  
0.078314448  
-1.903575701  
0.007827657  
0.060828071

-0.055602778  
0.980090688  
0.017687854  
0.405171923  
-0.025467331  
1.207588699  
-0.04409051  
0.067806491  
0.014866079  
-0.044129595  
-0.131195881  
1.684392691  
-0.053895173  
1.21686478  
0.031891105  
1.711354148

-0.132721532  
0.222871525  
0.223156585  
-2.002337222

-0.067047115

-1.247066843  
0.676455091  
-0.068343018

-0.580522248

-0.006422452

-0.082783728  
-7.697024108  
-0.1012198  
-1.575563967  
1.255240332  
-0.051228748

-0.00660135

-0.00724426  
-0.187171475  
0.174555202  
0.57043965  
-1.790444474  
-0.014324145  
-0.10022856  
-0.248742508  
-0.019188249  
-0.487804206  
0.115219734

-0.173930083

0.072754655  
-1.67861885  
-0.454719497  
-0.962774413  
0.436295511  
1.128800141

-1.579311858  
1.203976574  
0.123419171  
0.048317031  
-2.061479079  
1.676776064

0.642005468

-0.609878352

0.463933787

-0.484744032  
-2.32917214  
-0.167012245  
-0.055469161  
0.147599401  
-0.007072431

-0.032655434  
-0.137387927  
-0.017136202  
-0.014937555  
-0.020414339  
-0.31120716  
-0.001886215  
2.307460659

0.283395687

0.577039479  
-2.30903814  
-1.858321  
-0.035794452  
-0.080029212  
0.623627177  
0.189440663

0.050142411  
0.118294522

0.708527811  
-0.816125097  
-0.077898163  
-0.019016696  
-1.181820845  
0.675685122  
-0.562986836  
0.321701923  
-0.228532857  
-0.096335657  
0.242964625  
-0.266233037  
-0.133377883  
1.311053572  
0.157658572  
0.116558874

-0.439642663  
-1.449885093  
2.296924578

0.080242589  
-0.016309669  
-0.22696717  
-0.004045406  
-1.632082059

0.064119875  
-0.039766323  
-0.036907868

0.820753514  
-0.004854457  
1.470768976  
-1.546664998  
-0.650498122  
-0.651763201

-0.624226558  
0.09116011  
0.007640285  
1.952573943  
1.613473658

0.095892523  
0.010550657  
-0.113774957

0.250371988  
-0.343948077  
1.397801244

0.031369133  
-0.181019596  
-0.060972367  
-0.940774348  
-0.391701443  
-0.0657273  
-4.048776284  
-0.046028253  
-0.048003455  
-0.800554617  
-0.033019544  
-0.414242679  
0.019503085  
0.538004707  
0.461104737

0.088999209  
0.020919216  
1.530371004



1.404065264  
-0.238055719  
-1.244342564

0.271758673  
-0.169493328  
0.877377232  
0.389991471

-0.024717842

-0.46650154

0.052701061  
0.036090489  
0.153101586  
0.023266869  
-0.167347472

-0.012228013  
-1.660757045  
-2.086955646  
0.127714151

0.266826263

-0.229063561  
0.180113404  
-0.034702265

1.014356822  
0.159240663

0.485115658

0.061363372  
0.025598658  
-0.155707875

0.199745243  
0.827022456

1.02030601  
-0.005844981

0.849408259  
1.118908695

0.536057349  
-0.078601727  
1.535215961  
0.358399602  
0.094855928  
0.746294566  
0.295418617  
-0.044766879  
-1.730475028  
0.145711824  
-0.116540077  
0.297711388

-0.04350464  
0.888437368  
0.169429763  
0.96187283  
0.475268811  
1.373719941  
0.057899402  
1.091313192

1.581360264  
0.815895292  
0.448734209  
-0.773272088  
-0.322669022  
-1.328862607  
-0.090482586  
-0.035668784  
0.236835415

-0.025329228

-0.002017059  
0.096065079  
1.800490548  
-0.010591595

-0.077166211  
-0.022507302  
0.249206131  
-0.093616982  
-0.032695866  
0.094141838

1.760339197  
0.016956019  
1.297069354  
0.00095709

-0.065283474

-0.100960856  
0.221063107  
0.852521633  
-0.056003669  
-0.492036489  
0.009210904  
0.471113179  
0.210621386  
0.142022857  
0.100279702  
0.02550467  
-0.08767694  
-2.004369523  
0.210423698  
-1.181093596  
1.158368274  
-1.021525715  
-0.011900862  
-0.006251303

0.12169929  
1.886053112

0.874460939  
0.795916309  
-0.293858748

-0.102063429  
-1.350454889  
-0.053431394  
4.194293804  
0.078126864  
-1.606555727  
-0.754574892  
2.015269867

1.665969268  
0.03884299

1.542009444  
-0.384780402  
-6.390671614  
-0.004490683  
-0.215136697  
0.099336921  
0.128316193  
0.533409899  
-0.004920488  
0.041497293  
0.190520931  
0.048876038  
-0.001661072  
0.903606367  
-0.046418758  
  
-0.197327461  
0.29807068  
-0.015974454  
  
0.017191341  
0.016283538  
-0.219071567  
  
-0.787831619  
-0.050959264  
1.009894468  
2.172757605  
-1.327194602  
0.27174341  
0.053034177  
0.895773634  
0.685196576  
0.11142049  
  
0.82481542  
1.199529001  
0.192692989  
2.059695874  
-0.095035237  
0.004371551  
0.006786693  
-0.013574229  
0.29095222  
-0.258741053  
-0.127966104  
  
0.000217614  
-0.025187874  
-0.072959088  
-0.164715297  
0.045551101  
-0.030604552

0.254024843  
0.139301601  
-0.003316408  
0.290111808  
0.070839624  
-0.016289472  
-0.097217692  
-0.133297722

-0.013687077  
0.738006158  
0.146475793  
-0.171585701  
0.037274128  
0.034958705  
2.555994232  
-0.045199727  
0.203227393

1.216160781  
-0.153831889  
-0.511224958  
-0.61507591  
-0.32465279

-0.289582031

-0.003573219  
0.000494073  
0.204388261  
-0.29810407  
-0.135743645  
-0.173304595  
0.065812795  
-0.001815871  
-0.000850848  
0.245754473

-1.495992232  
-0.027279929

-0.236258528

-0.012355845  
0.063213061  
0.869175724  
0.089876185  
-0.028022878

0.049177082  
-0.076372062  
-0.034797187  
0.023905955  
-0.195979963  
0.023239105  
0.035638449  
-0.283653111  
1.75605251  
0.018892359  
0.068005586  
-0.05261808

-0.120667216  
0.24170024  
0.063604187

0.727736702  
-0.000551657

-0.061776321

-0.029108316  
0.035932577  
0.693130889  
0.076981775  
-0.322391019  
-0.015925913  
0.852085536  
0.038712515

-1.237336972  
-0.077791221  
0.001942544  
-1.247728039  
-0.135410943  
0.121314485

0.256288245  
-0.033189224  
0.56655016

0.087225062  
-0.031897996  
-0.031347383  
1.719971897  
0.000590528  
1.029515768  
-0.573658464  
2.099911246

1.518440047  
-0.488007402

0.043612619  
-0.021415872  
1.818311207  
-0.435238871  
0.011123063  
-0.11519875  
0.029733915  
-0.158403255  
-0.443972498  
0.366904463  
0.061579808  
0.039856914

-0.273702849  
-0.044159315  
0.133070383  
0.060462719  
-1.037240904

0.162134998  
0.004330067  
-0.139364281  
-0.038584372  
-0.682713139  
0.013097075  
-0.032296018  
-0.022296264  
0.300996647  
-0.250153831  
1.205512805  
0.40588182  
0.001833132  
0.075738092  
1.89641658  
0.005909639  
-0.018742421  
0.639346438  
0.014763836  
-0.020986548  
-0.261073312

-0.015117353  
-0.43572301  
0.640120208  
0.050715942

0.125310399  
-2.732798127  
-0.002491299  
1.746649188

-0.063464239  
0.001039161  
-0.427772163

1.072638519  
-0.241868588  
0.103241231

-0.147947315  
-0.107906056  
0.619660369  
-0.011576925  
-0.834750191  
-0.030974867  
1.18367767  
-0.672938101  
-0.420173473  
0.030393408  
-1.702388905  
0.633102989  
0.099669915  
-1.333860956  
0.022214145

-1.282549104  
-0.262401355  
-0.409779642  
-0.13472768  
-0.785284545  
-1.520978269  
-0.053357994  
0.961440183  
-1.659848861  
0.133232084  
-0.433599184

-0.040370788  
0.059692005  
0.598308377  
-0.051785363  
-1.828472511  
-0.02132532  
-0.009112331  
0.050472687  
-0.020258602  
1.539644471  
0.060358375  
0.048557957  
0.565097761  
-1.344698595  
-0.027688056  
0.035214026



-0.150439134  
-0.803883205  
0.224497709  
-0.072250015  
-0.219379916  
-0.025712505  
-0.197457036  
-0.066117144  
0.697640094  
0.653385946  
0.647141012  
-2.177439358  
-0.013215523  
-0.004027906  
1.283281205  
-1.765684495  
-1.493280246  
-0.684834007  
0.005019195  
0.381966132

-0.008913097  
-1.165142884  
-0.673088737  
0.064244565  
-0.882501773

-1.025458504  
-0.000642424  
-0.015208325  
1.558704159

0.041102698  
4.764597911  
-2.199818726  
0.776486268  
-0.175524287  
-0.407088314  
-0.243639061  
-1.820221037  
-2.09512267  
0.029116324  
0.030225706  
-0.534642081  
-1.397783001  
-0.518006075  
0.956891878  
-1.265377197  
-2.225032451  
-2.262239871  
1.315298675  
0.077166758

1.792945723  
0.019811687  
-0.002452065  
-0.158131508  
-0.033663205  
0.99673017  
-1.318759448  
-0.019550129  
0.02532964  
-0.087288589  
-1.150297845  
-0.173322331  
0.294672998  
0.072704337  
0.224173857  
0.119667356  
-0.047197484  
-1.087240134  
-1.479791665  
-0.967089782  
0.072593225  
0.005587452  
-0.827975369  
-0.068614286  
-0.063147765  
-3.913721947  
-0.083993243  
-0.104970407  
0.87405676  
0.070278051  
-0.448996566  
-0.192628451  
  
-0.038132237  
-0.8328535  
1.480223619  
1.081610807  
-1.039321455  
-0.045909148  
0.029084449  
  
-0.140405636  
0.144822701  
0.021326979  
0.159008885  
-0.066059419  
0.769081832  
-0.126995156  
0.015038578  
  
-0.134702759  
0.041929225

0.072509182  
-2.510661911  
-1.15115856  
1.105797139  
-0.005875741  
0.094447772  
-1.427448653  
-1.706005977  
-0.960832088  
-0.058782538  
0.671368603  
-2.154606364

0.204514549  
0.093248471  
0.277428227  
0.276379988

0.025457278  
0.920683744  
-2.832593584  
0.429880594  
0.000890948  
-0.103240634  
0.739324927  
-0.162518371  
0.070266959  
0.010886728  
0.211225393  
0.627965718  
0.392526324  
-0.087516198  
0.157765854  
0.917663288  
0.023771377  
0.006854813  
-0.23606221  
-1.573508723  
0.479008034  
0.077767328  
0.031049836

-0.026205623  
1.052037902  
-0.065325858

-0.025047067  
2.046877808  
-0.061243552  
0.136074184  
-0.761993839  
-4.867489396  
-0.603823253  
0.104505799  
2.319082774  
0.601062125  
0.914483019  
0.767575163

1.20597043  
0.023292782  
0.358792577  
-0.122340517  
-0.013397806  
0.071258181  
-1.418479005  
-0.001413517  
-0.099200118  
-0.036602197  
-0.408801908  
1.953842594  
-0.007425649  
-0.470906279  
1.746609575  
0.012017214  
-0.42919467  
-0.944569164  
-5.199801064  
0.052694991  
-0.812886277  
0.052292515  
-0.755757818  
0.013840405

0.072500436  
0.005008536  
0.443142826  
0.042255896  
0.008193056  
-0.013369928  
0.008723293  
-0.041285776  
-0.513370302  
-0.152000576  
-0.28519896  
0.697053572

0.021366009

-0.267193106

0.170025605  
0.348920496  
-0.166424185  
-0.864633361  
-0.625731975  
-0.032837663  
0.994158129  
1.52271966  
-0.002786777  
-0.07430569  
-0.030005543  
0.636021127

-0.586750252  
0.228430153  
0.002020312  
-0.040673238  
0.734613605  
-0.0039741  
0.390444508  
-0.82061351  
0.017097036  
-0.015543027  
1.846730172

-0.155113873

-0.508247495  
0.547258254  
-0.453774175  
0.00831039  
-0.389116388  
-0.042603362  
-0.03388678  
0.110510395  
-1.557028837  
0.069879928  
0.008859785  
-0.028498456  
1.11940142  
1.376187009  
0.033140781  
0.908733618  
-0.164736733

0.208440442  
-0.082847885  
-0.007766628

-2.099807787

-0.213462932  
0.011744212

0.002322429  
1.195482251

0.155745638  
0.039492597  
1.03676308  
0.061004819  
1.724333766  
-0.325828649  
-0.25393931

-0.049691505  
0.225455198  
0.334850284

-0.013038249  
0.137048402  
0.016519291  
0.104345401  
-0.057251182  
-0.033295049  
-1.292069528  
-0.098794543  
0.649723879  
2.035199129  
-0.170120444  
0.994673806  
-0.167694961  
-2.519320129  
-0.427595588  
0.057040245  
-0.000286967  
-0.160359085

-0.178990342  
-0.00737304  
-0.841692001  
0.063350622  
-0.073340764

-2.76633867

-0.0134291  
-0.448753299  
-0.756727688  
-0.033365675  
-0.00888633  
-0.097791562  
-0.503420569  
0.382555713  
1.790678504  
-0.005192009  
-1.201799889  
2.350960392  
-0.582924121  
-0.075387403  
0.033225407  
-0.110089956  
0.023914651  
-0.831743421  
-0.071359714  
-0.17202499  
-0.516545832  
-0.008099002  
-0.385327192  
-0.985673442  
0.23140575  
-1.869026996  
-0.0856617  
0.716443531  
-0.442136811  
-0.086332834  
-0.153341058  
0.669979505  
0.664894317  
-1.478449959  
0.436882047  
0.433773625  
1.130283753  
-1.960640151  
0.002985087  
1.751765387  
0.02397334  
0.104586391  
-0.469695162

-0.103033355  
-0.690323321  
-0.68201396

-0.361868777  
0.105066002  
-0.236360011  
-0.145899534

-0.083125423  
-0.333457398  
0.07777289  
-0.010523139  
-1.894739165  
0.006818956  
0.005924985  
-2.024520927  
-0.065433394  
0.094873853  
0.035180627  
-1.141126953  
-0.871186708  
0.003396965  
-0.327309313  
-0.148940462  
1.109246009  
0.879865216  
-0.107858904  
-0.893871274  
-1.048100972  
-1.766011511  
0.531945827  
  
0.188951846  
1.934264047  
-0.143894102  
0.132583857  
-0.061021052  
-0.162299588  
  
-0.000496455  
0.032933107  
-0.042963192  
0.06759344  
0.080333266  
  
-0.039863889  
-0.078951793  
0.434664161  
0.025520599  
-0.000347867  
-3.16563964  
-3.61023203  
1.3992665  
0.237911633  
-0.052016201  
0.098568506  
0.46273686  
-0.632372055  
-0.061966163  
-0.135910547  
-0.026004605



-0.158684688  
0.234127458  
0.448700738  
0.205416721  
0.316588646  
0.054984113  
-0.128843745  
0.126341629  
-1.690927897  
0.156694691  
-0.499328043  
0.211818225  
0.818666285  
-0.784746138  
0.10363215  
-0.872563488  
-3.15449462

0.152163128  
-0.050292885  
-0.007431165  
-0.008498293  
0.109601726  
1.121655125  
2.126153024

0.006378484  
-0.172671688  
0.355256019  
0.236138032  
0.62126665  
-0.059229028  
0.331822289  
1.049079812  
-0.062977937  
-0.063720755

0.884825336  
0.134783459  
-0.025811401  
0.009646624  
0.06869774  
-1.861695536  
0.337914282  
-1.294907624  
-0.112076839  
0.094360169  
0.518267156

-0.03091298  
-0.191073081  
-0.12459293  
-0.101432774

-0.223669214  
-0.012142635  
2.418408782  
0.104047147  
0.009927139  
-0.026451808  
0.64780568  
0.164265492  
2.448375613  
1.863707156

-0.231254746  
-5.02197729

0.044261941  
0.057100065  
0.190666363  
-0.016267594  
0.134483391

-0.094522733  
0.244685676  
-0.482101043  
0.142156832  
-0.892866163  
0.092584927  
0.029498933  
-0.114591996  
0.034658785  
-0.004278895  
0.404988692  
2.152562773  
1.08581986  
0.018698952  
0.015931554  
1.071304593  
-0.068737915  
-0.717078263  
-0.092096963  
0.513477789  
-0.095321498  
-0.439260358  
1.014428285  
0.019443151  
0.557680664  
0.112267046  
0.25232938  
1.680418768  
0.755067807  
-0.002098234

-0.000352351  
0.048969299

0.774234377

-0.301958051  
-0.451987572  
-0.225507371  
-0.005320125  
0.206867685  
-0.091710145  
0.852055348  
-0.200298556  
0.044172567  
0.008476259  
0.280117946  
0.032340492  
-1.15741264  
-1.065261021  
-0.190317701  
0.046570848  
0.095430256  
0.028119247  
1.728981887  
0.809912356  
-0.108910365  
-0.616601849  
-0.038342239  
-0.1226435  
2.470178852  
0.411379095  
0.223244499  
-0.184531337  
1.167862441  
-0.105977099  
-0.112148864  
0.004424333  
-0.001713597  
-0.033812483  
-0.40683769  
1.434115557  
-0.083441301  
-0.089786109  
-0.094425983  
-1.268777631  
-0.200988971  
-0.026004216  
-0.571257083  
0.749121411  
0.044199966  
0.038363419  
1.2035064  
-1.12329384  
-0.199288744

0.041184211  
0.09052171  
-1.315706796  
-2.272335093  
1.205710983  
-0.199918032  
-1.108125842  
0.25222723  
2.035647978  
1.421017157  
2.02118313  
-1.214100551  
-0.497410989  
-0.057125068  
0.000814066  
-0.522265117  
0.092313442  
-1.463950972  
1.08771238  
-0.285206065  
-0.118310188  
-0.069378409  
0.038737944  
-1.726015706  
-0.947740393  
0.164634444  
-0.609684728  
  
-1.63267787  
0.159289627  
-3.315166008  
0.004576966  
0.012780029  
0.972799448  
0.355609655  
-0.222432348  
-0.250486472  
-0.011815258  
-0.071400707  
-1.579691189  
-0.169730067  
-0.179293703  
-0.020198498  
0.686937605  
-2.021284762  
-0.999826853  
1.547679835  
-1.383738201  
  
-0.033489513  
0.089884302  
-0.131672697  
-0.169299405

-1.29782794  
-0.049889435  
-0.106629001  
0.063695901  
0.785769796  
-0.000353262  
-1.36383776  
-0.06878005  
-0.155946737  
0.249645472  
0.059940994  
-0.79497775  
-1.501769922

0.001203596  
-0.035693051  
-3.452407506  
0.310380687  
-0.021488585  
-0.801116241  
3.714797762  
-0.543633647  
-0.011469356  
0.020046677  
-0.344826989  
-0.062370227  
-0.055967568  
-0.0040688

0.733914613  
0.025990582

0.021241953  
0.083311616  
1.01071785  
-0.724474248  
2.754825051  
0.442687019  
-1.587362154  
0.062759421  
0.341011978  
0.014144003  
1.67485705  
-2.616211417  
-1.74194052  
-0.438967069  
-2.054932425  
-1.977780744  
0.14410789  
0.083584249  
-0.066370779  
2.243474101  
0.111593899

0.141481682  
0.023639462  
-0.121418105  
0.279931145  
-0.090638303  
0.30735047  
-2.015702031  
-0.104372986  
0.318467553  
-0.149177299  
-0.036112517  
0.328450555  
1.1237771  
-0.019666784  
0.087089784  
-0.080457238  
-0.005744358  
-0.446827437  
0.030633673  
-0.645029635

-1.231150376  
-0.036922391  
-0.113554546  
1.713152352  
0.169809655  
0.015697854  
0.330388207  
0.112402915  
1.668769666  
-0.087749994  
0.002678519  
-0.108534276  
-0.20628793  
1.38714202  
0.188121892  
1.548638068  
-0.774434028  
-0.280469199  
-0.135325444  
-0.053019717  
0.062047319  
-0.048620606  
1.73291739  
0.891110406  
-12.54815418  
0.362906959

-0.022766037  
0.024117656  
0.923969199  
0.297262028  
-0.08913829  
-0.818913159  
2.386230284  
-0.194236311  
-0.81226933  
-0.579097307  
0.973235698  
-1.320940098  
0.678135662  
1.178121994  
-0.100729169  
-1.097143366  
0.074809528  
0.148502461  
-1.87082011  
0.114111409  
-0.097878777  
1.772370153  
-0.372497243  
0.230578098  
-0.077201917  
-0.724057273  
-0.165614429  
-0.200534541  
0.186623885  
0.089756183  
-0.04969998  
-2.140210324  
-1.143241228  
0.069447548  
0.94928863  
0.952680325  
-0.127775288  
-1.195730667  
-0.067891537  
0.021595363  
-1.483046243  
-0.320936412  
-0.687353999  
0.005618544  
-0.071028389  
-0.922738434  
-0.001383825  
-1.817062494  
1.071412587  
1.896907703  
0.859148902  
0.015638941  
-0.081841013

-1.280303539  
-1.634061701  
-0.521089709  
-0.371609284

-0.890794119  
-0.050028141  
-0.206759289  
-0.692530158  
-0.54593117  
-3.241571696  
-0.023926773  
0.44581819  
0.229527309  
1.062981037  
-1.903736113  
-1.106326171  
0.030179027  
-0.711340386  
2.007703659

0.00904973  
-1.697551227  
-0.017667707  
-0.272838567  
-0.015391385  
2.637659879  
-0.657004137  
-1.223149657  
0.050625233  
-0.041501494  
0.000462695  
-0.14835127  
0.419112987  
1.379991046  
0.922282415  
0.06016759  
-0.036992628  
-0.369953361  
-1.150875129  
-1.092953194  
-0.22969425

-0.069815796  
-0.031779348  
0.029125468  
-0.002679263

0.046682409  
-1.706534622  
0.059131466  
0.08930293  
-0.052754164



0.233736416  
-0.103703348  
0.564867264

-0.420457207  
-0.106090103  
0.973350592  
0.017650163  
0.015272966  
1.088470124  
-0.201738473  
-0.033510746  
1.227869973  
0.052684856  
-0.010364992  
1.253299433

0.685449104  
-0.044311087  
0.651039059

0.027544355  
-0.075878626  
0.367548244  
0.105190271  
0.606414958

-1.055019396

0.233977792  
-0.98481975  
-0.014385538  
0.255731966

-0.554126294  
0.054610849  
0.028971211  
0.033465093  
0.076507982  
-0.761712666  
0.910960121  
0.042169914  
-0.044994581  
0.806250496  
-1.400595546  
-0.192449863  
-0.023705049  
0.839341599  
-0.185953484  
-1.519261532  
1.836695949  
2.027284978  
-0.270471731  
-0.050407482  
-0.912798279  
-0.135613555  
-0.062461943  
-0.022851508  
0.011888725  
0.517997907  
0.004948422  
-0.077991058  
0.755891588  
0.395217679  
1.164961445  
0.033560712  
1.444506171  
2.662673955  
3.192525032  
0.938549385  
0.11780427  
0.556541047  
0.934519697  
0.210069543  
1.296345122  
-0.043575415  
0.314165056  
0.260015401  
-0.125793677  
0.019641341  
-0.15583673  
0.084864244  
-0.05311145  
1.758550949  
0.03736347  
0.95174261  
0.057152756

-0.085796117  
2.089254116

-1.467057219  
-1.291627364  
1.832334638  
0.059765749  
0.114990873  
-1.318788605  
-0.16443234  
0.036612839  
-0.09242062  
-0.242753229  
0.036551819  
0.011269412  
0.023533309  
-0.929614521  
-1.84E-05  
-0.059574905  
0.162318541  
0.914461975  
0.209046956  
0.393530388  
-0.00795192  
0.406083457

0.012929674  
-0.222696894  
-0.851721721  
1.091829664  
-0.261902474

0.100820416  
-0.068842847  
0.007558469  
-0.450353747

0.271758376  
0.032953331  
0.103496967  
-0.03376163  
1.103992304  
0.65264841  
-0.320443494  
-0.034506522

-0.215573016  
-4.721479238  
0.925417322  
-0.034851459  
-0.053586177  
0.674838839  
-0.023648238

0.460901737  
-0.014269304  
0.070474304  
-0.151058449  
0.294642929  
1.7749104  
-0.176355351  
-1.69064134  
-0.587207877  
-0.005834149  
-1.492028925  
-0.200472363  
-0.097120349  
-0.641396145  
  
-0.933221398  
-0.281993253  
  
-1.11982014  
-0.145185639  
-0.818747177  
-1.952425271  
-0.764218756  
0.014343254  
-0.073972237  
-2.27048592  
-0.758172772  
1.943595319  
-0.852623709  
-1.300566514  
0.036047809  
  
-0.082514682  
0.031828975  
  
0.21664821  
-1.840750807  
0.718530623  
-1.308004257  
  
-0.258968135  
-0.105267025  
0.08875311  
-2.53638032  
-0.016982657  
-0.8475482  
-0.955928189  
-1.217419939  
-0.259401151  
-0.637235951  
1.351597822  
0.530228008

-0.059216053  
0.894558224  
0.347518731  
0.58715876  
-0.235183551  
0.167713201  
1.084274569  
-1.086796763  
0.052045481  
-0.081963118  
-0.904677995

0.745715241  
0.048376544

-0.0021325  
0.106000972  
-0.070164553  
0.867487022  
-0.510726298  
-0.190783371  
0.07963907  
0.043894533  
-0.000722943

1.209871133  
0.261051853  
-0.021330125  
1.127739242  
-0.016349389

-0.23519133  
0.757890441  
-0.006764859  
0.361143593  
-0.157983084  
-0.090380226  
1.027636546  
1.830708131  
-0.037236752  
0.957479956  
0.497693198  
-0.076447922  
-0.059184222  
-1.273280869

0.155175489  
-0.323836872

-1.248763463  
-0.1218857

-0.007728387  
-0.999196815  
0.073778385  
0.003988104  
-4.556805306  
0.488154792  
0.131774398  
-1.801693789  
-2.90669463  
-0.73933876  
-0.430920499  
-0.183060852  
-0.057513395  
-0.004787844  
0.05329589  
-0.009960846  
0.000377234

0.049815414  
-0.082313623  
0.033163362  
-0.028836243  
2.22273142  
-0.188313053  
-0.23257832  
-0.154646334  
0.009323803  
-0.123437949  
0.054616761  
-0.11662309  
-1.829256932  
-0.187450437  
-0.013371209  
0.065822252  
0.065492475

0.039945062  
0.145084273  
-0.035489148  
-0.193081237  
0.391059336  
0.042832424  
-0.021094996

0.623331189  
0.013192392  
-0.113031831  
-0.560246794

-0.048062865  
0.645798578  
1.396053408

0.065199368  
-0.11480973  
0.023758601  
-1.291468366

0.923468924  
0.585946032  
-1.064209135  
-0.233314173  
1.218720625  
-0.058265612  
0.063165741  
-0.051668407  
-0.04422798  
-0.898989234  
0.017955997  
-1.291857195  
1.060650724  
0.284019373  
-1.294045934  
0.0798241  
0.053746931  
-0.007645887

-0.318161966  
-1.250930681  
-0.083703294  
-1.735945497  
-0.179629198  
0.069922028  
-0.609868228  
0.064383522  
-0.669610723  
-0.08156017  
-2.849509536  
0.361682077  
-0.349080786  
-0.128980455  
1.108647988  
-1.877289106  
-1.919435628  
0.270354343  
0.19944553  
0.025206737  
0.052960839  
-0.909134807  
-0.162180393  
-0.00151983  
0.038625861

2.43865261  
0.001006186  
0.064467489  
0.036461963  
-0.270235709  
-0.005430673

-0.18625144  
-0.020405033  
0.189004019

-0.029675202  
0.196599695  
1.611454665  
-0.003950791

-0.067003645  
-1.059574146  
-0.876373664  
-1.689278747  
-1.125993506  
0.231755314  
-5.162280265  
-0.690549684  
0.067280105  
0.056023486  
-0.103191614  
-0.207168423  
-0.02657498  
1.356488172  
0.00634138  
2.214514178  
-0.150083297  
1.266153048  
-0.071267584  
0.763613699

0.272402608  
0.100390069  
1.798301943

0.056394772  
-0.037727573  
-0.048185838  
-0.072723643  
0.007335813  
-0.199825452



0.05437974  
0.06946766  
-0.288898207  
-0.182260435  
0.099802333

0.046594628  
-0.282079782  
-0.16965447  
-0.044784051  
0.004338957  
-0.000180157  
0.070062646  
0.055122656

0.176138076

0.519990923  
0.697825285  
0.077492549

-0.00766124  
0.09093069  
-1.330688082  
-0.006157775  
-0.000485072  
0.312099946  
0.086291593  
-0.052747774  
-0.496903864  
-0.132631703  
-0.887578098  
-0.003960794  
0.174342606  
0.834438128  
0.294882181  
1.47903468  
0.65990547  
-0.209961275  
-1.016142003  
-0.276229968

0.05527409  
-0.049306884  
0.035802677  
0.119584054  
-0.516441119  
1.032330103  
0.33888872  
0.336861665  
0.249655356  
0.03225852

-0.854244763  
-0.701398112  
-2.094174987

-1.894313694

0.021690472  
0.003533305  
-0.047930189  
1.229964515  
-1.439719647  
0.001907307  
-1.794281704

0.378333815  
-0.015124001  
0.057886992

1.242240429  
1.064637997  
0.17928925  
-0.235932655  
0.815158236  
-0.432349698  
-1.903136149  
-0.047672927  
-0.21052714  
0.784743018  
-0.030293481  
0.034395455  
-0.096991621  
-4.03E-05  
-0.952106143  
0.923483273

0.606018162  
0.53003171  
-0.012588166  
0.081099083  
2.485160266  
1.611159704  
-0.066852344  
0.115472765  
0.151620275  
0.005435583  
-0.26321659  
0.425213915  
0.021502192  
-0.003161257  
0.959587732  
0.026127209

-0.082427207

-1.411126093

-0.392590453

-0.846578921

-0.558671983

-0.201943594

0.280743328

-0.051200339

-0.089474997

-2.297253429

-0.007715661

0.025365755

-0.252362548

0.009045947

-0.714166828

-1.202342661

0.31829157

0.034643742

0.342445966

-2.956230659

0.167029003

1.590751922

-0.046836297

-0.027301138

-0.52283739

0.010812477

0.02090323

0.120411869

-1.838609145

-0.156641332

0.37207899

0.130499992

-0.22580087

0.023829202

-0.461885078

0.132751273

0.81691744

0.045245673

-0.00248078

-0.163405823

-0.043418039

-2.034513716

-1.457817321

0.022401039  
0.281673695  
-0.043893871  
0.058442808  
-4.317955911  
-1.521029845  
-0.462512255  
-0.082239508  
1.302076627  
0.054350655

-0.54639656  
0.04766231  
1.410895359  
-1.095982966  
-0.726892635  
0.273302785  
0.020425755  
0.06515058  
1.014062754  
-0.022149981  
0.077596795  
-0.002854666  
-0.007634167  
-1.464791885  
0.018284815  
-0.38357947  
0.166369962  
-1.359802258  
-1.384434246  
-0.20982732  
-0.061729474  
-0.640247175  
2.338919147  
0.170731123  
-0.358155281  
-0.038505743  
1.390812365  
0.328340933  
-1.661588187  
-0.007484945  
-0.009010655  
1.258181535  
-0.00685963  
0.353091571  
0.895561605  
-0.667509405  
1.208834548  
-0.273930217  
-0.048661429  
-0.445250958  
-1.646128405  
-0.034615853

0.383216737  
-1.536783318  
1.268087129  
0.007404894  
0.123782715  
0.00909786

0.798000711  
0.275125861  
1.619585561  
-0.247950863  
-0.06854663  
0.031260302  
0.817638437  
-0.005401697  
-0.30502455  
0.056537755  
-0.139603275  
-0.538165103  
-0.949884579  
-0.267160877  
-1.711673025  
0.145329292  
0.218678855  
-0.007774039

0.03098362  
-0.33055523  
-1.606685871  
0.127542756  
-0.064846909  
0.007640282  
-0.028326699  
0.377758761  
0.145487849  
0.47258008  
1.252641559  
0.024367682  
-0.038255166  
-2.389240313  
0.004300849  
-1.331706596  
1.854296598  
0.950835574  
0.07943833  
-0.266773282

1.889798562  
0.124836576  
0.080882955  
-0.290696636  
-18.53459441  
0.170331664

0.150363159  
0.424278416  
-0.091184187  
0.073270863  
-0.475252533  
0.245898628  
-0.252291406  
-0.035747241  
-0.159302845  
-0.014512915  
-0.981018749

-1.126073373  
0.133212201  
-0.61000575

-0.033191579  
-0.058081714  
-0.160946103  
2.743887911  
0.501358259  
-1.605702779  
-0.016727461  
0.252955107  
-0.566910019  
0.015587439  
-0.071738267  
0.118452606  
-0.213171964  
0.134015023  
0.113964184  
-0.545210861  
-0.001322234  
0.130362553  
0.166953787

0.008682059  
-0.048466508  
0.027056301  
-0.935958908  
0.008757021  
0.079596856  
-0.04397772

-0.320786009  
0.047320647  
0.034693199  
-0.04742189  
-0.192273834  
-0.040478723  
-5.049933224  
-0.468424156  
-0.22249202

-0.194074529  
-0.047016984  
-1.891440458  
-0.432065839

-0.160676749  
-0.269941693  
0.193429729  
0.011133036  
-0.634223437  
0.202704783  
-0.676395078  
-0.030866642  
0.167729329  
1.729196268  
0.001845592  
-1.290215337  
1.558003726

0.310996191  
0.469951986  
-0.055861136  
-0.13385936

-0.014647439  
-1.466425061  
0.006489152  
-0.602955506  
-2.192641581  
0.113345095  
-0.801092432  
-0.389007109  
-0.362139962  
-0.475817535  
-2.804351356  
-0.468476438  
-0.105456041  
-0.218370261  
0.889037934  
-0.154745969  
-0.690728248  
0.131671753

-1.487100116  
1.523022103  
0.003709344  
-0.385447244  
0.020786161  
-0.382132181  
-0.042733387  
-1.699473764  
0.22143958  
0.834252309

-0.085015907  
-0.769038722

0.39664767  
-0.086380915  
-1.055641732  
-0.222644931  
0.169490373  
-1.648548964

-0.115559302  
0.56065299  
1.331923889  
-0.832411293  
0.189552213  
-0.027973347  
0.534219561  
-0.064056682  
-0.015742776

1.270792362  
-11.11070022  
-0.003840705  
-0.119125383  
0.042442931  
0.005744874  
0.879221509  
-3.041937027  
0.242361641  
-1.162990145  
-0.159109932  
0.124731499  
-0.090970298  
2.024789999

0.026255319  
-0.030311297  
2.06000903  
0.00385733  
-0.020084293  
0.440681444  
-0.102420969  
0.019744805  
-0.110308644  
-0.159123234  
-0.572822827  
-0.091319192  
0.004483238  
-0.065788883  
0.142416162  
0.952265691  
0.234489624



-0.029051453  
1.500566509  
1.567380358  
1.365802972  
0.006803487  
0.192720629  
-0.231737483  
0.046839835  
-3.161628292  
-0.073064109  
0.073293828  
0.459250023  
-0.103193111  
-0.022407773  
0.012819314  
0.7052254  
1.229395456  
0.019146292  
-0.033597864  
-0.253463299  
0.002409442

0.040110874  
-0.026199314  
-2.190062254  
1.296285638  
0.102512778  
0.024938436  
-0.596528501  
0.828842662  
-0.257840635

-0.024924202  
0.298876456  
0.70728858  
0.196527244  
-0.072402376  
-1.027393051  
-0.327694696

-0.18654649

-0.24467968  
0.028663879  
1.965387306  
-0.381791775  
-2.529100369  
-0.118660901  
-0.002582853  
-1.158577534  
-0.610511592

0.04387398  
1.476649973  
0.293652713  
-0.022693769  
0.89794956  
-0.40137787  
0.135894332  
0.925117029

-0.14155846

0.001658442  
0.566881325  
0.115203312  
0.002096007  
0.135690915

1.007026241  
0.578127642  
0.543163685  
0.034976177  
0.563477241  
-0.021771207  
-0.773601841  
-0.744642314

0.053679902  
-0.039635025

2.67464676  
-0.006828504  
-0.007016097  
2.13408723  
-1.009874928

0.979697245  
0.128603531  
-0.097525273  
0.115004336  
-0.169816342

0.034906483  
-1.063347684  
1.377122037  
0.019198835  
-0.273075838  
0.159471499  
0.595794806  
-0.011438361  
0.043826215  
-0.030386878  
-0.015452923

2.965900546  
-5.47052127  
-0.121837116  
0.640942552  
0.090160911  
-2.37039214  
-0.986436683

-0.602235519  
1.013824488  
0.151384036  
0.016456134  
-0.085570111  
-0.344060754  
0.259245338  
0.617262436  
-0.018708611  
-0.038817227  
0.004341197  
0.034609333  
-0.211690991  
-0.029281674  
-0.196119397

-1.0473378  
-0.05871547  
0.289964502  
-0.027149296  
-0.033755473  
0.357516135  
0.351516488  
-6.161065617  
0.098421394  
-1.19224183  
-1.36508003  
0.009282435  
0.052580799  
-1.171483497

-0.290820698  
-2.105724932  
-0.560669832  
-0.409794911  
-0.03631002  
0.025153378

0.180437225  
-0.119128836  
0.201145818  
0.221041609  
0.135153928

0.412917861  
0.235750441  
-1.2916782

0.554038062  
0.670401587  
-0.059188254  
0.030612475  
-0.472885776  
1.109881006  
0.000240522  
-0.054724987  
1.083356601  
-0.060930637  
0.175790409  
1.302179397  
-0.542962526  
-0.834104955  
-0.046508715  
-0.026772789  
0.051923405  
-8.47E-05

-0.224414525  
-0.333772907  
-0.027461121  
-0.139170423  
-0.165719195  
-0.984368904  
-0.776740034  
0.570845634

1.788372334  
0.210925798  
0.116986331  
-0.005457597  
-0.003624383  
0.67201803

-1.584170579

-0.228801563  
-2.39451491  
-0.333857157  
-0.019486833  
0.804017565  
-0.05643085  
1.413572224  
-0.039823982  
-0.495213436

-0.005176922  
-0.378470961

-0.519383905  
-0.78055375  
0.395219598  
0.177351365

0.065485626  
-0.777326877  
0.011424945

-2.165386712  
0.17583679  
0.005909526  
-0.376950014  
0.014794845  
-0.025244372  
-0.088190742

-0.145424781  
0.070468611  
-0.663182376  
1.761918943  
-0.544036247  
0.113049397  
-0.177574458  
-0.00844463  
-0.045557001  
0.526524003  
-0.118452949

-0.001482193  
-1.35542518  
-0.692107468  
-0.075332423  
-0.224372002  
-1.407068225  
-0.591645216  
0.340109896  
-0.210926933  
-0.049237249  
0.06335324  
0.016827978  
0.020999487  
-0.121942238  
-1.113883838  
-0.018659435  
-0.048376618  
-0.172433645  
-0.095269001  
-1.235385147  
-0.234635392

0.008329845  
-0.015378142  
2.703945768  
-1.296306419  
0.099246296  
0.952508322  
0.241821852  
-0.985351651  
0.018022355  
-0.088408096  
0.734339095  
0.007054975  
-1.793490042  
-1.550525842  
-1.20626951  
0.280364624  
0.609223175  
0.052558179  
-0.019229515  
0.014134953  
-0.094542057  
-0.987044825  
2.307760214  
0.80734853

0.03893514  
0.142072547  
-1.146438776  
-0.436599665  
-0.125428116  
0.342726194  
0.049774655  
-0.223574243  
0.023013581  
-2.430813101  
0.499948486  
-0.083784215  
-0.062690362  
0.564232504  
0.228206387  
-0.107445546  
0.002113462  
-0.06451076  
-0.154713291  
-0.575806065  
0.066266125  
1.195600156  
-0.035217035  
0.384322961  
-1.034585844  
0.397001519  
0.029990649  
-1.091040161

-0.122639817  
0.024099697  
0.262723198  
0.005236992  
-2.243412537  
-0.998414325  
-0.024921097  
-0.00481618  
-0.006809529  
1.086793794  
0.058395708  
0.038557871  
0.811355501  
0.363532829  
-0.012496181

-0.355045794  
-0.001331968  
-0.003752406  
0.301618105  
-0.027752556  
0.039568007  
-0.009489164  
0.081298945  
-0.028183266  
-2.489286118  
-2.819033748  
-1.383639768  
2.248796047  
-1.010085367  
-0.20029843  
-1.988271786  
-0.695372797  
-0.0891615  
-0.351397593  
-0.003761509  
0.001607277  
0.080447146  
-1.452677953  
-0.028890986  
2.017354088  
-0.14071558  
0.0255413  
0.038926318  
-0.002873673  
-0.489321456  
-1.189430171  
0.922353053  
0.30708373  
0.009959092  
-0.078041949  
-0.009776086  
-0.051168881

0.03066987  
-0.023436374  
1.107235255  
-0.020826279  
-0.652060912  
-0.089342334  
0.117181532  
-0.056651485  
0.208419114  
0.153748853  
-0.054305132  
0.602505359  
1.589599754  
0.005826855  
-0.006819344  
-0.613484105  
-2.615233891  
-0.001260788  
0.027817169  
0.798041655  
0.163607396  
-0.312679543

0.004785361  
0.192714244

1.208171324

-0.102594901  
1.205526335

0.136548137  
-1.043555127  
-1.774161984  
-0.44690827  
0.010940037  
0.275750637  
-1.944436378  
0.077192662  
-0.402235263  
-0.048783931  
-0.66323989  
-1.976245148  
-1.656906521  
0.177306504  
0.205541296  
-3.070963559  
-0.324496654  
-0.76663918  
-0.012047775  
-0.154142266  
-0.033664131



2.12875777  
-0.442637967  
0.044740644  
0.080876384  
-0.870208755  
-0.036005798  
0.007039001  
-0.072111911  
-0.002950554  
0.222636371  
0.000607381

-0.74863197  
-1.953422298  
-0.008076353  
0.511252233  
0.020046644  
0.005767381  
-0.101645486  
-0.571356604  
-0.245943111

-1.975273505  
0.685232706  
-1.844060628  
2.031311632  
-0.324298289  
-0.070798853  
-3.798072218  
-1.700202413  
1.177487079  
0.03069254  
-0.026222447  
-1.188511945  
2.033121549  
0.058889712  
-0.126608509  
2.230812018  
-0.912475035  
0.539325016  
-0.220574657  
0.01069148  
-0.808055661  
-0.105943173  
-0.659723562  
-0.24901013  
0.204736965  
1.09689364  
0.027506706  
0.330974347  
-0.003642751  
0.976346458

0.107242563

0.066320365  
-0.022739418  
0.027440319  
0.116016404  
1.43116635  
0.336194895  
0.769497821  
0.139996921  
1.404314261  
0.41057237  
0.043784795  
-0.348159479  
0.012592489  
-0.079502594

-0.008848687  
0.388362463  
0.153228502  
-0.09041147  
-1.156409323  
-2.158128738

0.138048902  
2.329435688  
0.520115787  
0.17111116  
1.127324534  
0.588878474  
-0.135552477  
-0.589846851  
-0.009682657  
-0.658132199  
-0.08587409  
-0.041887723  
0.670527241  
0.459570966  
0.000970875  
0.907063219  
0.083339723  
-0.365580925

0.233007898  
0.64069875

1.552685989  
-1.040478085  
-0.001574874  
0.471626813  
-0.088352662  
-0.173413533

-0.292957824  
-0.133672878  
-1.170870324  
0.051526538  
-0.101786519

0.032222364  
-0.04236125  
1.110610228  
-0.213988911  
1.156773894  
1.061013756  
-0.033400247  
-0.239530251  
0.071007819  
-1.832177748  
1.277681352  
-0.034522975  
-0.211968871  
1.341261952  
-0.302489873  
0.217726388  
-0.096646855  
-0.507504414  
-0.035821747  
0.823893493  
-0.495419818

-0.074098551  
0.214077291  
0.646536752

-1.130604413  
0.209443917  
-0.024669007  
0.304506165  
-0.03133051

0.358716097  
0.043379567  
0.00733864

0.953264815

-0.773886336  
1.356351748  
0.461921768  
-0.40006557  
0.529860363  
0.07914977  
0.051666582  
-1.065478199

-0.028622064  
-1.458469418  
0.007230655

0.06243468  
0.748709997  
0.658171138  
-2.546373289  
-0.049890791  
1.336305088  
0.351987521  
-1.210532049  
0.080693237  
0.343757042  
0.112876031  
-0.158569603  
-1.550828797  
-1.52233987  
0.857365285  
-0.033058043  
0.089457736  
1.157964266  
1.075914733  
-0.286500038  
0.238043275  
0.566731938  
0.447813739  
0.999155801  
-2.287378659  
-1.033101653  
-1.329094186  
-0.084478887  
0.549184989

-0.000420121  
0.302665627  
-0.008533688  
0.672611732  
-1.834158243  
0.140660531  
-0.051619513  
-1.31389886  
-0.400869583  
1.013685192  
0.6970859  
1.376881903

0.120206096

-0.147379521  
-0.244172414

-0.72708416

0.367683306  
0.982522303  
-0.025319841  
1.726237521  
0.088289716  
0.011943104  
0.177462833

-0.015046607

0.704642316  
-1.462878456

-0.018884524

-3.359913828  
-1.44673844

0.464288626

1.36570308  
0.068985274  
0.252227121  
-0.048200007  
-0.519884625  
-0.06124421  
0.159431106  
0.0747042  
-0.028448528

0.042223033  
-0.096012837  
-0.02364171

1.71095079  
0.053881136  
0.762830227  
0.016565893  
-1.565877611  
0.888073444  
1.009856429  
-0.443246351  
0.393700845

0.043265346  
0.051376126  
-1.305054597  
0.020131629  
0.103611343

0.153633079  
0.049862533  
-1.084089851  
-0.719000719  
0.052872268  
-0.10966321  
-0.152877975

0.879089041  
0.089081642

-0.017803533  
-1.405800813  
-1.340844278  
0.140430357  
-0.087625365  
-0.147125278  
-0.083173498  
-0.095679558  
-0.429883609  
0.455159323  
0.127398287  
-0.920569009  
2.805846064  
-0.098936572  
-1.034143552  
-0.129266521  
0.123014162  
1.531289334  
1.34771698  
0.427411204  
-0.433507996  
0.176556461  
-2.706998185  
1.040290201  
0.019949862  
-0.22978076  
0.936497595  
-0.083828445  
0.158229009  
0.187499794  
0.700203058  
0.010861994  
0.161850066  
0.004998604  
-0.169797896  
1.412882444  
0.12570486  
0.361491876

0.075877526

0.096341054  
-0.469223386  
-0.002081106  
-2.726750699  
0.441291409  
1.318263435  
-0.383599891  
0.083849356  
0.542958895  
-0.218975449  
-0.090392183  
-1.105057691  
-0.610613713  
-1.239931312  
0.894498849  
0.036625216  
1.58491706  
0.001097003  
0.204683386  
-0.264532641  
-0.725997494  
1.729553409

-1.553563256  
1.60857342  
-0.004040471  
0.016369696  
-0.205926754  
-0.942971375  
0.005732067  
0.466657125  
-0.096130303  
-0.250522996  
0.097802375

0.363643316  
0.358792273  
0.117151722  
-0.062898344  
0.010578184  
-0.101215099  
0.179426137  
0.080308807  
2.738179027  
3.040332185  
-0.13294707  
-2.070191138  
0.254660155  
-1.711829516  
0.290757794  
-0.865151168  
2.158442976  
1.788881387

0.121619168  
-0.908687356  
-0.211402979  
-0.040670366  
0.008723967  
-1.442568284  
-0.12731325  
-0.031068118  
-3.039848209  
-0.032386325  
-0.956717338  
1.404884167  
0.024597988  
0.889015265  
-0.757651946  
-0.138487904  
-0.008877002  
-0.266499183  
0.279834166  
1.375646051  
1.269121339  
-0.510089873  
-0.038260554  
1.371941691  
-0.007536343  
-0.363857748  
-0.069920537  
-1.483043737  
-0.130175355  
-0.640942892  
0.052297924  
1.23215533  
0.004403313  
0.198507274  
-0.61742487  
0.905954271

1.070723682  
0.148548864  
-0.474177094  
-0.064169848  
-0.096840495  
-0.332513507  
0.241453171  
-1.088024174  
-0.124202658  
-0.198586907  
0.004415653  
-0.074977359  
1.644553235  
0.170407105



-1.074839722  
-1.161982478  
-0.229334683  
0.016912668  
0.012875267  
-0.255835984

0.433279511  
-0.246908052  
-1.370156179

-0.347712574  
0.468996777  
-0.722014837  
-0.069748476  
0.028729716  
-0.221145106

0.139022047  
-1.008812679  
-0.43042675  
-0.295263191  
-0.048295349  
0.437481904  
0.089612424  
0.936236061  
0.434641813  
0.286756792  
-2.041779611  
-3.371081473  
0.021903103  
2.292076713  
1.911012488  
-0.190406627  
-1.427949687  
1.537669731  
-0.055633602  
-0.272940523  
0.105540055  
0.045914639  
0.009662377  
-0.007380362  
-1.184809977  
0.125023785  
0.100319482  
-0.006420068  
-0.791975576  
-1.663753593  
0.191651255  
0.8003564  
-1.067529771  
-0.047668401

-0.024695625  
0.067331762  
-1.053184748  
-0.24967741

0.11534736  
-0.094466612  
-0.033354324  
-0.021642403  
-1.821907563  
-0.402119311  
-0.229606445  
0.752319261  
-1.652550049  
0.045980252  
0.193239959  
-0.916588537  
0.070719244  
-0.069037107  
0.004485374  
0.008077353  
0.002819902  
-0.072985874  
0.072005966  
0.873663494  
0.836641014  
1.780570228  
-0.072949571  
-0.04972912  
0.655758821  
-4.6127994  
-4.129310962

3.511948177  
-0.131554374  
1.03531638  
2.094195872  
-0.000239249  
-0.063126131  
0.319574096  
-0.797326928  
-1.701162813  
-0.000989161  
0.030354304  
-2.186039076  
0.059371417  
0.869131881  
0.090921321  
-0.174670181  
-0.015478757  
-0.689466259  
0.049162555  
-0.003181061

-0.655421097  
-0.080751117  
  
-0.246382585  
-0.012200166  
0.041692642  
-1.088398644  
-0.010555109  
0.100772421  
1.521727736  
0.103713502  
0.034414583  
-0.296387356  
-0.029355555  
  
-0.029519697  
1.013377155  
-0.295879097  
0.114587529  
-0.602400246  
0.077837549  
-0.163443772  
0.143675779  
-0.018264784  
0.5212069  
0.844553101  
-0.079786234  
2.915395591  
-1.347063667  
-0.00857255  
0.237610454  
-0.032755279  
-0.488858505  
0.834760591  
0.955840906  
-0.016247273  
-3.649718884  
-0.778051385  
-0.081510826  
  
0.130042281  
-0.008986287  
  
-0.023055775  
0.647826508  
-0.022576642  
  
-0.160926498  
-0.279034981  
1.429852965  
0.0049121  
-1.526684504  
0.221744641

0.183866439  
0.10670137  
-0.586298647

1.15E-05  
-1.276798473  
-0.570127407  
-2.241834013  
-0.28587228  
0.649462493

-0.386401585  
0.015195259  
-0.03337163  
0.309904969  
0.063816731  
0.392208815  
-0.130934009  
-0.001405841  
-0.003650236  
-2.456869982  
-0.000366725  
-0.26685858  
-0.057809748  
-0.06135162  
0.018212572  
0.109372568  
0.016618186  
-0.065934075  
-0.010525556  
-0.001108794  
0.062550439  
-0.206329362  
0.006803738  
-1.354707032  
2.439823844  
-0.152388446  
1.736630098  
-0.065014104  
1.24099451  
-0.149549167  
-1.985007301

-0.094360001  
-1.701485973  
-0.015335438  
0.017583073  
1.030645979  
0.118912031  
-0.020734115  
-0.32068215  
-0.029197249

-0.224253766  
-0.137034198  
-2.58088163  
0.006815764  
0.498596052

0.048180736  
2.180361695  
1.047240229  
0.029430742  
-0.479078352

-0.043645698  
-0.045801214  
-0.08173344  
0.017456297  
-0.015962378  
-0.399688269  
0.108314455  
0.041247388  
-0.793580187  
0.743676322  
-1.033510644  
0.946186477  
-1.717156098  
0.013300704  
1.035588452  
-1.664269109  
2.19830324  
0.331765675  
0.788104472  
0.14447694  
0.796950443  
0.144938826  
1.458874582

0.002074357  
-0.203131308  
-0.629805097  
-0.00368444  
0.050025855  
0.679140041  
1.39949631

-0.005633765  
0.117652257  
-0.016756351  
-1.247523817  
-0.044634053  
2.037440148  
1.970973248

-0.381285797  
-0.291356219

0.036660485  
1.855742703  
1.2241469  
0.184930451  
-0.516950148  
-0.752116169  
0.025981318  
0.347325329  
2.340028192

0.72975424  
1.40280574  
-0.074188448  
0.027740529  
2.664186054  
3.185066583  
0.175197839  
-0.077282318  
-0.020473651  
-1.006179325  
-0.196014815  
0.414917144  
-0.021710291  
0.305025305  
0.461645527  
0.716069816  
0.562747772  
0.045653769  
-0.345701003  
0.226309122  
-0.364800935  
0.089490788  
-0.040818988  
-0.031174747  
-0.019331827  
-0.006499527  
0.569829169  
-0.001478292  
0.081630283  
0.547305311

-1.170148385

-0.879064834  
0.952735273  
-0.607323953  
1.342135906  
-0.710288274

0.86968169  
0.448133461  
-0.090157942  
2.187080284  
-1.038826765  
-0.065235764

-0.093893956  
-0.474340649  
-0.02761322  
-0.16888969  
-1.422505893  
0.005183903  
1.166133017  
-0.226788878  
-4.097829174  
0.697937236  
-1.25697152  
-0.044530493  
-0.331532253  
-0.083612099  
-0.051280628  
-0.08854747  
0.143462461  
-0.027936847  
-1.57591517  
0.146818546  
1.442316418  
0.250707124  
0.005473632  
0.109561975

0.002052059  
0.891490431  
1.11852583  
-0.04068831  
0.036415572  
-0.583968164  
-1.387842185  
-0.047231594  
-0.246381747  
0.745279368  
-0.06337115  
1.156703706  
-1.393498881  
0.585153989  
-0.003174058

-0.103527495  
-0.17198478  
-0.237791441  
-0.148815374  
0.884438669  
-0.152381191  
-0.870118878  
-2.143137631  
-3.544358379  
1.015338095  
-3.565709573  
0.484414534  
-0.094504614  
1.459798692  
-0.552752311  
0.050029813  
-0.802480855  
-2.154354603

0.228143919  
-1.875996828  
0.171362187  
0.173440968  
-0.030136087  
0.142636886  
0.962633389  
-1.99002598  
-0.170806371  
-0.010499462  
0.171209295  
-0.003546744  
4.127114074  
-0.027421554  
-0.065494318  
-2.101243534  
0.777407528  
-0.192528244  
0.106080318  
-0.01527687  
-1.47970923  
-0.685892342  
0.122289927  
-2.466767833  
0.472784995  
-0.241788721  
-0.800710122  
0.026647411

-1.073750522  
-0.147197981  
-0.260987161  
0.457505602



-0.330321554  
0.410341458  
-0.298739362  
-0.046104071

-0.011631031  
1.351553621  
0.172093138  
-2.192463897  
0.009682874  
-0.165136839  
-0.59044647  
0.002941978  
0.091622756  
1.053722657  
-0.970027564  
0.068347272  
-0.07893912  
-1.952893993  
-0.018392428  
-0.051231744  
0.451327617  
-0.212104779  
-0.05389171  
-0.050653919  
-0.231385047  
0.389786955  
-0.127302816  
-0.058373644  
1.088991319  
-1.008485517  
-0.022718812  
-0.429057901  
-0.137069304  
1.998178825  
-0.694348562  
0.052050614  
-0.091016196

0.656688491  
0.173736668  
-1.03932273  
-0.273928819  
-0.451549188  
0.089732742  
-0.049084643  
-0.285212378  
-1.881994068  
-0.022228554  
-0.212047314  
1.7715306  
-2.058443164  
1.163248357

-0.019301386  
-13.24463122  
-14.44171165  
-0.141749738  
-0.046401528  
-0.022761483  
0.267947574  
0.02800282  
1.093814366  
1.463483107  
0.130744467  
-0.047996277  
-0.046793758  
0.195921116

-0.165647824

2.824259757  
-0.067206647  
0.236752437  
-0.277731516  
0.143357526  
0.043622598  
-0.025909278  
1.540829285  
-0.008051017  
0.420263782  
0.508010301  
-0.218063937  
0.001075279  
-0.117457137  
0.032600922  
-0.052797334  
0.900930242  
-0.082914934  
-0.603829309  
0.679593313  
-0.128248017  
-3.305576681  
-1.890965229  
1.126494803

0.009724581

0.06383927

-0.790379295  
-0.024713942

1.579751405  
0.697647002  
-0.038423868  
0.7094312  
0.050803183

1.898194789  
1.125988117  
-0.027650642  
-0.530776634  
0.800727107  
2.165131586

0.349919526  
0.042541359  
0.157450946  
1.571022523  
1.04294186  
0.75302481  
0.910072044  
-0.102513679  
0.230079598  
0.007789806  
1.569592094  
0.042798594  
-0.986090454  
0.84938079  
0.405863713  
0.046243042  
0.217445496  
0.532064163  
1.811192118

1.409587099  
-0.154698652  
-0.010954664  
1.53311632  
-16.97066787  
0.07640682  
-0.387700411  
-0.155406818  
0.33032007  
0.028574626  
0.507601352  
0.174113655  
1.07357859  
-0.06446375  
-0.023284209  
1.704725641

1.534216161  
-0.075048163  
0.155078119  
0.162046842  
1.905204195  
0.485410481  
0.068503027  
1.251178978  
0.349146168  
0.057786209  
-0.00786458  
0.056987035  
-0.150230551  
1.124646575  
1.354551141  
2.197603091  
1.60223201  
0.384072015  
0.335946611  
-1.076277506  
0.012765279  
-0.062759798

0.021305171  
0.74369771  
2.25768603  
-0.103555817  
0.440801579

1.773310323  
-0.005559851  
1.312960606  
0.153820246  
0.252618483  
0.173320639  
0.477621669  
-0.029198922  
-0.014263184  
-0.071610288  
1.077852086  
-0.129434911  
-0.35297299  
0.234083053  
0.31172925  
0.60140581  
0.193795562  
1.014101381  
-0.031428655  
-0.191608609

1.149957901  
0.059027617

0.003091102  
0.2973802  
0.043348629  
3.509009667

-0.027469262  
0.02487042  
-0.26159404  
1.391860016  
0.289909945  
0.274612802  
0.139350328  
0.627404917  
0.521624544  
0.210192729  
0.392272535  
-0.850150254  
-0.1209087  
0.024192751  
0.213360813  
0.052123281  
0.451129373  
0.692625369  
-0.168375093  
1.38385597  
1.282386265  
1.048875298  
0.805652752  
1.270277371  
0.280719053  
-0.848679749  
-0.071029057  
2.353754927  
1.451746523  
-1.912859446  
0.135605176  
0.099615655  
0.440177779  
2.085740566  
2.28371558  
0.017740162

-0.002602762  
0.877242439  
0.846346106  
1.37852872  
0.009051294  
0.005580693  
1.304274838  
0.904867674  
0.449987963  
0.468157764

0.847284173  
0.252796369  
  
0.046921423  
  
0.483533552  
  
0.006820756  
  
0.296758447  
-3.136892939  
0.239880229  
0.073173168  
2.145666591  
1.465148752  
0.212012303  
-0.361261447  
  
-0.188619971  
  
0.642845272  
-0.016426001  
0.098108841  
0.040576199  
  
0.006698021  
-1.213872898  
0.222563432  
-0.317311147  
1.653250966  
-3.884851009  
-0.013352301  
0.602596577  
-0.056203898  
0.063930997  
-0.333985592  
0.061553195  
-0.111299581  
-0.052516724  
2.352558749  
0.003024442  
0.081613646  
0.025368516  
0.18355044  
0.209659629  
0.094953537  
1.050389431  
-0.028627802  
0.203192362  
-0.344084668  
1.041044715
